# Supplementary material for: Circulating metabolites and coronary heart disease: a bidirectional Mendelian randomization
Source: Front Cardiovasc Med. 2024 May 21;11:1371805. doi: 10.3389/fcvm.2024.1371805 (PMC11148779; doi:10.3389/fcvm.2024.1371805)
Supplement: Supplementary file 1 [file Table1.xlsx]

## Sheet: Sheet1
Supplementary Table S1. Compilation of Identification Numbers (IDs) for Each of the 1,400 Blood Metabolites.
ID	Metabolites
GCST90199621	Carnitine levels
GCST90199622	Benzoate levels
GCST90199623	Maltotriose levels
GCST90199624	Hippurate levels
GCST90199625	Methionine sulfoxide levels
GCST90199626	Xanthurenate levels
GCST90199627	N-alpha-acetylornithine levels
GCST90199628	3-methylhistidine levels
GCST90199629	Glycerophosphorylcholine (GPC) levels
GCST90199630	Phenylacetate levels
GCST90199631	3-methyl-2-oxovalerate levels
GCST90199632	Tartarate levels
GCST90199633	Suberate (C8-DC) levels
GCST90199634	5-hydroxylysine levels
GCST90199635	3-phenylpropionate hydrocinnamate levels
GCST90199636	Kynurenine levels
GCST90199637	N-acetylglutamate levels
GCST90199638	Glycerol 3-phosphate levels
GCST90199639	Imidazole lactate levels
GCST90199640	4-guanidinobutanoate levels
GCST90199641	Glucuronate levels
GCST90199642	Ribitol levels
GCST90199643	Glycodeoxycholate levels
GCST90199644	Theobromine levels
GCST90199645	Quinate levels
GCST90199646	Gentisate levels
GCST90199647	Theophylline levels
GCST90199648	1,5-anhydroglucitol (1,5-ag) levels
GCST90199649	1-stearoyl-2-arachidonoyl-GPI (18:0/20:4) levels
GCST90199650	Indolelactate levels
GCST90199651	Docosahexaenoate DHA; 22:6n3 levels
GCST90199652	1-stearoyl-2-oleoyl-GPS (18:0/18:1) levels
GCST90199653	1-myristoyl-2-palmitoyl-gpc (14:0/16:0) levels
GCST90199654	Paraxanthine levels in elite athletes
GCST90199655	4-methyl-2-oxopentanoate levels
GCST90199656	3-indoxyl sulfate levels
GCST90199657	Sphingosine 1-phosphate levels
GCST90199658	Alpha-hydroxyisocaproate levels
GCST90199659	1-stearoyl-GPI (18:0) levels
GCST90199660	1,2-dipalmitoyl-gpc (16:0/16:0) levels
GCST90199661	Maleate levels
GCST90199662	Isovalerate (i5:0) levels
GCST90199663	4-acetylphenol sulfate levels
GCST90199664	Phenyllactate (PLA) levels in elite athletes
GCST90199665	N-acetylaspartate (naa) levels
GCST90199666	Palmitoylcarnitine levels (Metabolon platform)
GCST90199667	Erythritol levels in elite athletes
GCST90199668	Hexanoylcarnitine levels (Biocrates platform)
GCST90199669	Acetylcarnitine levels (Biocrates platform)
GCST90199670	Iminodiacetate (IDA) levels
GCST90199671	Cysteine s-sulfate levels
GCST90199672	Oxalate (ethanedioate) levels
GCST90199673	DHEAS levels
GCST90199674	3-hydroxymyristate levels
GCST90199675	Homoarginine levels
GCST90199676	1-oleoylglycerol (18:1) levels
GCST90199677	3-methyl-2-oxobutyrate levels
GCST90199678	Tartronate (hydroxymalonate) levels
GCST90199679	2,3-dihydroxypyridine levels
GCST90199680	3-hydroxyoctanoate levels
GCST90199681	2-hydroxyoctanoate levels
GCST90199682	Homocitrulline levels
GCST90199683	Indoleacetate levels
GCST90199684	1-linoleoylglycerol (18:2) levels
GCST90199685	2-linoleoylglycerol (18:2) levels
GCST90199686	Indolepropionate levels
GCST90199687	Threonate levels
GCST90199688	N-acetylglycine levels
GCST90199689	Glycolithocholate levels
GCST90199690	EDTA levels
GCST90199691	1-methylhistidine levels
GCST90199692	Citramalate levels
GCST90199693	3-hydroxydecanoate levels
GCST90199694	1,3-dimethylurate levels
GCST90199695	Galactonate levels
GCST90199696	Trigonelline levels
GCST90199697	Dodecanedioate levels
GCST90199698	Isobutyrylcarnitine (c4) levels
GCST90199699	3-methylxanthine levels
GCST90199700	3-hydroxylaurate levels
GCST90199701	Pyridoxate levels
GCST90199702	5-hydroxyhexanoate levels
GCST90199703	Gamma-glutamylvaline levels
GCST90199704	3-hydroxysebacate levels
GCST90199705	Propionylglycine levels
GCST90199706	Butyrylglycine levels
GCST90199707	Pro-hydroxy-pro levels
GCST90199708	Propionylcarnitine (c3) levels
GCST90199709	Adrenate (22:4n6) levels
GCST90199710	Docosatrienoate (22:3n3) levels
GCST90199711	Docosadienoate (22:2n6) levels
GCST90199712	3-carboxy-4-methyl-5-propyl-2-furanpropanoate (cmpf) levels
GCST90199713	Docosapentaenoate n3 DPA; 22:5n3 levels
GCST90199714	3-hydroxy-2-ethylpropionate levels
GCST90199715	Myristoleate (14:1n5) levels
GCST90199716	10-undecenoate (11:1n1) levels
GCST90199717	1-methyl-4-imidazoleacetate levels
GCST90199718	Sebacate (C10-DC) levels
GCST90199719	Tauro-beta-muricholate levels
GCST90199720	Octanoylcarnitine (c8) levels
GCST90199721	Stearidonate (18:4n3) levels
GCST90199722	Decanoylcarnitine (C10) levels
GCST90199723	5-dodecenoate (12:1n7) levels
GCST90199724	N-acetylisoleucine levels
GCST90199725	Campesterol levels
GCST90199726	N-acetylthreonine levels
GCST90199727	1-oleoyl-GPC (18:1) levels
GCST90199728	10-nonadecenoate (19:1n9) levels
GCST90199729	Piperine levels
GCST90199730	Carnitine C14 levels
GCST90199731	10-heptadecenoate (17:1n7) levels
GCST90199732	1-stearoyl-gpc (18:0) levels
GCST90199733	1-palmitoyl-GPC (16:0) levels
GCST90199734	Hyocholate levels
GCST90199735	N-acetylhistidine levels
GCST90199736	Alpha-hydroxyisovalerate levels
GCST90199737	N-acetylproline levels
GCST90199738	Stachydrine levels
GCST90199739	Salicyluric glucuronide levels
GCST90199740	P-cresol sulfate levels
GCST90199741	Gamma-glutamylglycine levels
GCST90199742	1-linoleoyl-gpc (18:2) levels
GCST90199743	Stearoylcarnitine levels
GCST90199744	Eicosenoate (20:1) levels
GCST90199745	Aconitate [cis or trans] levels
GCST90199746	Erythronate levels
GCST90199747	Isovalerylcarnitine (C5) levels
GCST90199748	Linolenate [alpha or gamma; (18:3n3 or 6)] levels
GCST90199749	Gamma-glutamylthreonine levels
GCST90199750	Laurylcarnitine levels
GCST90199751	Gamma-glutamylmethionine levels
GCST90199752	Epiandrosterone sulfate levels
GCST90199753	Gamma-glutamyltryptophan levels
GCST90199754	7-methylxanthine levels
GCST90199755	3,7-dimethylurate levels
GCST90199756	1,7-dimethyluric acid levels
GCST90199757	1,3,7-trimethylurate levels
GCST90199758	N4-acetylcytidine levels
GCST90199759	Indolebutyrate levels
GCST90199760	5-acetylamino-6-amino-3-methyluracil levels
GCST90199761	N1-methylinosine levels
GCST90199762	N6-carbamoylthreonyladenosine levels
GCST90199763	1-methylxanthine levels
GCST90199764	N2,n2-dimethylguanosine levels
GCST90199765	4-hydroxyhippurate levels
GCST90199766	3-(3-amino-3-carboxypropyl)uridine levels
GCST90199767	5,6-dihydrouridine levels
GCST90199768	Phenylacetylglutamine levels
GCST90199769	3-hydroxydodecanedioate levels
GCST90199770	1-arachidonylglycerol (20:4) levels
GCST90199771	7-methylguanine levels
GCST90199772	1-stearoyl-GPE (18:0) levels
GCST90199773	Phenol sulfate levels
GCST90199774	Oleoylcarnitine levels
GCST90199775	Gamma-glutamylisoleucine levels
GCST90199776	Malonylcarnitine levels
GCST90199777	1-palmitoleoyl-GPC (16:1) levels
GCST90199778	N-methyl-2-pyridone-5-carboxamide levels
GCST90199779	Gamma-glutamyl-2-aminobutyrate levels
GCST90199780	1-stearoyl-GPG (18:0) levels
GCST90199781	Hexanoylglycine levels
GCST90199782	Glutamine degradant levels
GCST90199783	5-methyluridine (ribothymidine) levels
GCST90199784	Cysteine-glutathione disulfide levels
GCST90199785	Isovalerylglycine levels
GCST90199786	2-hydroxy-3-methylvalerate levels
GCST90199787	Homostachydrine levels
GCST90199788	1-arachidonoyl-gpc (20:4n6) levels
GCST90199789	2-palmitoyl-GPC (16:0) levels
GCST90199790	2-palmitoleoyl-GPC (16:1) levels
GCST90199791	1-arachidonoyl-GPE (20:4n6) levels
GCST90199792	1-palmitoyl-GPE (16:0) levels
GCST90199793	1-linoleoyl-GPE (18:2) levels
GCST90199794	1-oleoyl-GPE (18:1) levels
GCST90199795	2-hydroxypalmitate levels
GCST90199796	Docosapentaenoate (n6 DPA; 22:5n6) levels
GCST90199797	Gulonate levels
GCST90199798	Isobutyrylglycine levels
GCST90199799	Glutarylcarnitine (c5-dc) levels
GCST90199800	Carnitine C5:1 levels
GCST90199801	Hydroquinone sulfate levels
GCST90199802	Beta-hydroxyisovaleroylcarnitine levels
GCST90199803	Catechol sulfate levels
GCST90199804	7-alpha-hydroxy-3-oxo-4-cholestenoate (7-hoca) levels
GCST90199805	Octadecanedioate levels
GCST90199806	Tetradecanedioate (C14-DC) levels
GCST90199807	Hexadecanedioate (C16-DC) levels
GCST90199808	Glycerophosphoethanolamine levels
GCST90199809	Taurolithocholate 3-sulfate levels
GCST90199810	1-palmitoyl-GPI (16:0) levels
GCST90199811	Glycolithocholate sulfate levels
GCST90199812	3-(3-hydroxyphenyl)propionate levels
GCST90199813	Deoxycarnitine levels
GCST90199814	Alpha-hydroxycaproate levels
GCST90199815	1-ribosyl-imidazoleacetate levels
GCST90199816	3,4-dihydroxybutyrate levels
GCST90199817	Indoleacetylglutamine levels
GCST90199818	Mannitol/sorbitol levels
GCST90199819	Tryptophan betaine levels
GCST90199820	Dihomo-linolenate (20:3n3 or n6) levels
GCST90199821	1-linoleoyl-GPI (18:2) levels
GCST90199822	1-oleoyl-GPI (18:1) levels
GCST90199823	O-cresol sulfate levels
GCST90199824	4-vinylphenol sulfate levels
GCST90199825	Pyrraline levels
GCST90199826	N6-acetyllysine levels
GCST90199827	Thymol sulfate levels
GCST90199828	N-acetylserine levels
GCST90199829	3-methyladipate levels
GCST90199830	4-ethylphenylsulfate levels
GCST90199831	1-stearoyl-2-oleoyl-GPE (18:0/18:1) levels
GCST90199832	Dimethylarginine (sdma + adma) levels
GCST90199833	Hexanoylglutamine levels
GCST90199834	Gamma-glutamylalanine levels
GCST90199835	5alpha-androstan-3beta,17beta-diol disulfate levels
GCST90199836	N-methylproline levels
GCST90199837	Carotenoid levels (cryptoxanthin)
GCST90199838	5alpha-pregnan-3beta,20alpha-diol disulfate levels
GCST90199839	Taurocholenate sulfate levels
GCST90199840	Pregnenediol disulfate (C21H34O8S2) levels
GCST90199841	Glycocholenate sulfate levels
GCST90199842	Androstenediol (3beta,17beta) disulfate (1) levels
GCST90199843	Chiro-inositol levels
GCST90199844	1-palmitoyl-2-linoleoyl-GPE (16:0/18:2) levels
GCST90199845	Sphinganine-1-phosphate levels
GCST90199846	Glycosyl-N-stearoyl-sphingosine (d18:1/18:0) levels
GCST90199847	4-allylphenol sulfate levels
GCST90199848	Succinylcarnitine levels
GCST90199849	21-hydroxypregnenolone disulfate levels
GCST90199850	5alpha-androstan-3alpha,17alpha-diol monosulfate levels
GCST90199851	Androstenediol (3beta,17beta) disulfate (2) levels
GCST90199852	5alpha-androstan-3beta,17alpha-diol disulfate levels
GCST90199853	5alpha-pregnan-3beta,20beta-diol monosulfate (1) levels
GCST90199854	5alpha-pregnan-3beta,20alpha-diol monosulfate (2) levels
GCST90199855	5alpha-androstan-3beta,17beta-diol monosulfate (2) levels
GCST90199856	Androstenediol (3alpha, 17alpha) monosulfate (3) levels
GCST90199857	5alpha-pregnan-diol disulfate levels
GCST90199858	5alpha-androstan-3alpha,17beta-diol monosulfate (1) levels
GCST90199859	5alpha-androstan-3alpha,17beta-diol disulfate levels
GCST90199860	Andro steroid monosulfate C19H28O6S (1) levels
GCST90199861	Pregnenediol sulfate (C21H34O5S) levels
GCST90199862	4-hydroxycoumarin levels
GCST90199863	16a-hydroxy DHEA 3-sulfate levels
GCST90199864	Gamma-CEHC levels
GCST90199865	2-hydroxyglutarate levels
GCST90199866	N-acetyl-beta-alanine levels
GCST90199867	Tridecenedioate (C13:1-DC) levels
GCST90199868	N-acetyl-3-methylhistidine levels
GCST90199869	2-hydroxyhippurate levels
GCST90199870	4-cholesten-3-one levels
GCST90199871	Androstenediol (3beta,17beta) monosulfate (2) levels
GCST90199872	Androstenediol (3beta,17beta) monosulfate (1) levels
GCST90199873	Pregnenolone sulfate levels
GCST90199874	S-methylmethionine levels
GCST90199875	13-HODE + 9-HODE levels
GCST90199876	Palmitoyl sphingomyelin (d18:1/16:0) levels
GCST90199877	Indole-3-carboxylate levels
GCST90199878	Sphingomyelin (d18:1/18:1, d18:2/18:0) levels
GCST90199879	Ergothioneine levels
GCST90199880	Cis-4-decenoylcarnitine (C10:1) levels
GCST90199881	5-(galactosylhydroxy)-L-lysine levels
GCST90199882	2s,3R-dihydroxybutyrate levels
GCST90199883	Cysteinylglycine disulfide levels
GCST90199884	2,3-dihydroxyisovalerate levels
GCST90199885	Alpha-ketoglutaramate levels
GCST90199886	3-methylglutaconate levels
GCST90199887	(16 or 17)-methylstearate (a19:0 or i19:0) levels
GCST90199888	Cinnamoylglycine levels
GCST90199889	2R,3R-dihydroxybutyrate levels
GCST90199890	4-hydroxyglutamate levels
GCST90199891	S-methylcysteine levels
GCST90199892	Isoursodeoxycholate levels
GCST90199893	Cis-4-decenoate (10:1n6) levels
GCST90199894	4-oxo-retinoic acid levels
GCST90199895	1-lignoceroyl-GPC (24:0) levels
GCST90199896	Sulfate levels
GCST90199897	4-hydroxy-2-oxoglutaric acid levels
GCST90199898	Glycoursodeoxycholate levels
GCST90199899	1-(1-enyl-palmitoyl)-GPC (p-16:0) levels
GCST90199900	Argininate levels
GCST90199901	1-methyl-5-imidazoleacetate levels
GCST90199902	Hydantoin-5-propionate levels
GCST90199903	2-oxoarginine levels
GCST90199904	Pantoate levels
GCST90199905	Formiminoglutamate levels
GCST90199906	1-(1-enyl-palmitoyl)-GPE (p-16:0) levels
GCST90199907	S-methylcysteine sulfoxide levels
GCST90199908	2-o-methylascorbic acid levels
GCST90199909	Eicosanedioate (C20-DC) levels
GCST90199910	1-(1-enyl-stearoyl)-GPE (p-18:0) levels
GCST90199911	Beta-citrylglutamate levels
GCST90199912	N-oleoyltaurine levels
GCST90199913	Docosadioate (C22-DC) levels
GCST90199914	Oleoyl-linoleoyl-glycerol (18:1/18:2) [2] levels
GCST90199915	Imidazole propionate levels
GCST90199916	Carnitine C18:2 levels
GCST90199917	Pregnanediol-3-glucuronide levels
GCST90199918	Carboxyethyl-gaba levels
GCST90199919	Alliin levels
GCST90199920	Trimethylamine n-oxide levels
GCST90199921	Dihydroferulate levels
GCST90199922	Prolylglycine levels
GCST90199923	N-palmitoylglycine levels
GCST90199924	N-methyltaurine levels
GCST90199925	Succinimide levels
GCST90199926	N-acetylcarnosine levels
GCST90199927	Histidine betaine (hercynine) levels
GCST90199928	2-stearoyl-GPE (18:0) levels
GCST90199929	Margaroylcarnitine (C17) levels
GCST90199930	(R)-3-hydroxybutyrylcarnitine levels
GCST90199931	Lanthionine levels
GCST90199932	Mannonate levels
GCST90199933	3b-hydroxy-5-cholenoic acid levels
GCST90199934	2-hydroxydecanoate levels
GCST90199935	Glycohyocholate levels
GCST90199936	3-methyl catechol sulfate (2) levels
GCST90199937	2-aminooctanoate levels
GCST90199938	3-methyl catechol sulfate (1) levels
GCST90199939	4-methylcatechol sulfate levels
GCST90199940	Guaiacol sulfate levels
GCST90199941	Gamma-CEHC glucuronide levels
GCST90199942	Dimethyl sulfone levels
GCST90199943	2-piperidinone levels
GCST90199944	Indolin-2-one levels
GCST90199945	Sphingomyelin (d18:1/14:0, d16:1/16:0) levels
GCST90199946	3-acetylphenol sulfate levels
GCST90199947	Sphingomyelin (d18:2/16:0, d18:1/16:1) levels
GCST90199948	S-allylcysteine levels
GCST90199949	6-oxopiperidine-2-carboxylate levels
GCST90199950	2-aminophenol sulfate levels
GCST90199951	N-acetylalliin levels
GCST90199952	2-aminoheptanoate levels
GCST90199953	3-methoxytyramine sulfate levels
GCST90199954	N2,N5-diacetylornithine levels
GCST90199955	Ferulic acid 4-sulfate levels
GCST90199956	1H-indole-7-acetic acid levels
GCST90199957	3-(3-hydroxyphenyl)propionate sulfate levels
GCST90199958	1-linolenoyl-GPC (18:3) levels
GCST90199959	O-sulfo-l-tyrosine levels
GCST90199960	N-formylanthranilic acid levels
GCST90199961	Methionine sulfone levels
GCST90199962	Acisoga levels
GCST90199963	17alpha-hydroxypregnanolone glucuronide levels
GCST90199964	Etiocholanolone glucuronide levels
GCST90199965	Fructosyllysine levels
GCST90199966	1-(1-enyl-oleoyl)-GPE (p-18:1) levels
GCST90199967	N-acetyltaurine levels
GCST90199968	1-palmitoyl-GPG (16:0) levels
GCST90199969	1-oleoyl-GPG (18:1) levels
GCST90199970	Octadecenedioylcarnitine (C18:1-DC) levels
GCST90199971	3-methylglutarylcarnitine (2) levels
GCST90199972	Sphingomyelin (d18:1/24:1, d18:2/24:0) levels
GCST90199973	Methyl glucopyranoside (alpha + beta) levels
GCST90199974	9-hydroxystearate levels
GCST90199975	Sphingomyelin (d18:2/14:0, d18:1/14:1) levels
GCST90199976	1-dihomo-linolenylglycerol (20:3) levels
GCST90199977	4-hydroxychlorothalonil levels
GCST90199978	Vanillactate levels
GCST90199979	Carnitine C14:1 levels
GCST90199980	N-formylphenylalanine levels
GCST90199981	2-acetamidophenol sulfate levels
GCST90199982	4-vinylguaiacol sulfate levels
GCST90199983	5alpha-androstan-3alpha,17beta-diol monosulfate (2) levels
GCST90199984	Vanillic alcohol sulfate levels
GCST90199985	Methyl-4-hydroxybenzoate sulfate levels
GCST90199986	Eugenol sulfate levels
GCST90199987	2-methoxyresorcinol sulfate levels
GCST90199988	Tyramine O-sulfate levels
GCST90199989	4-methylguaiacol sulfate levels
GCST90199990	3-hydroxypyridine sulfate levels
GCST90199991	Arabonate/xylonate levels
GCST90199992	Octadecanedioylcarnitine (C18-DC) levels
GCST90199993	Phenylacetylcarnitine levels
GCST90199994	Ethylparaben sulfate levels
GCST90199995	Sphingomyelin (d18:1/20:2, d18:2/20:1, d16:1/22:2) levels
GCST90199996	Sphingomyelin (d18:1/20:1, d18:2/20:0) levels
GCST90199997	Behenoyl sphingomyelin (d18:1/22:0) levels
GCST90199998	Propyl 4-hydroxybenzoate sulfate levels
GCST90199999	4-methoxyphenol sulfate levels
GCST90200000	Umbelliferone sulfate levels
GCST90200001	Sphingomyelin (d18:1/20:0, d16:1/22:0) levels
GCST90200002	6-hydroxyindole sulfate levels
GCST90200003	P-cresol glucuronide levels
GCST90200004	N-carbamoylalanine levels
GCST90200005	Citraconate/glutaconate levels
GCST90200006	1,2,3-benzenetriol sulfate (2) levels
GCST90200007	3-methoxycatechol sulfate (2) levels
GCST90200008	C-glycosyltryptophan levels
GCST90200009	3-methoxycatechol sulfate (1) levels
GCST90200010	Sphingomyelin (d18:1/22:1, d18:2/22:0, d16:1/24:1) levels
GCST90200011	Arabitol/xylitol levels
GCST90200012	3-hydroxyhexanoate levels
GCST90200013	Sphingomyelin (d18:1/22:2, d18:2/22:1, d16:1/24:2) levels
GCST90200014	3beta-hydroxy-5-cholestenoate levels
GCST90200015	N-acetylkynurenine (2) levels
GCST90200016	Dopamine 4-sulfate levels
GCST90200017	Sphingomyelin (d17:1/16:0, d18:1/15:0, d16:1/17:0) levels
GCST90200018	Adipoylcarnitine (C6-DC) levels
GCST90200019	Dopamine 3-o-sulfate levels
GCST90200020	Lignoceroyl sphingomyelin (d18:1/24:0) levels
GCST90200021	N-acetylglucosamine/n-acetylgalactosamine levels
GCST90200022	Glycochenodeoxycholate 3-sulfate levels
GCST90200023	Trans 3,4-methyleneheptanoate levels
GCST90200024	Taurodeoxycholic acid 3-sulfate levels
GCST90200025	Phenol glucuronide levels
GCST90200026	Glycodeoxycholate 3-sulfate levels
GCST90200027	4-hydroxyphenylacetoylcarnitine levels
GCST90200028	1-stearoyl-2-oleoyl-gpc (18:0/18:1) levels
GCST90200029	Linoleoyl ethanolamide levels
GCST90200030	1,2-dilinoleoyl-GPC (18:2/18:2) levels
GCST90200031	Nonanoylcarnitine (C9) levels
GCST90200032	2-hydroxybutyrate/2-hydroxyisobutyrate levels
GCST90200033	Sphingomyelin (d18:2/23:0, d18:1/23:1, d17:1/24:1) levels
GCST90200034	Tricosanoyl sphingomyelin (d18:1/23:0) levels
GCST90200035	Palmitoyl dihydrosphingomyelin (d18:0/16:0) levels
GCST90200036	1-palmitoleoylglycerol (16:1) levels
GCST90200037	1-stearoyl-2-linoleoyl-gpc (18:0/18:2) levels
GCST90200038	1-palmitoyl-2-palmitoleoyl-gpc (16:0/16:1) levels
GCST90200039	1-stearoyl-2-linoleoyl-GPE (18:0/18:2) levels
GCST90200040	Sphingomyelin (d18:2/24:1, d18:1/24:2) levels
GCST90200041	1-palmitoyl-2-stearoyl-gpc (16:0/18:0) levels
GCST90200042	Oleate/vaccenate (18:1) levels
GCST90200043	1-palmitoyl-2-docosahexaenoyl-gpc (16:0/22:6) levels
GCST90200044	1-(1-enyl-stearoyl)-2-oleoyl-GPE (p-18:0/18:1) levels
GCST90200045	1-stearoyl-2-arachidonoyl-GPE (18:0/20:4) levels
GCST90200046	1-stearoyl-2-docosahexaenoyl-gpc (18:0/22:6) levels
GCST90200047	Sphingomyelin (d18:1/17:0, d17:1/18:0, d19:1/16:0) levels
GCST90200048	1-(1-enyl-palmitoyl)-2-arachidonoyl-GPE (p-16:0/20:4) levels
GCST90200049	Myristoyl dihydrosphingomyelin (d18:0/14:0) levels
GCST90200050	5-hydroxyindole sulfate levels
GCST90200051	1-palmitoyl-2-dihomo-linolenoyl-GPC (16:0/20:3n3 or 6) levels
GCST90200052	1-(1-enyl-palmitoyl)-2-arachidonoyl-gpc (p-16:0/20:4) levels
GCST90200053	Sphingomyelin (d18:1/21:0, d17:1/22:0, d16:1/23:0) levels
GCST90200054	1-palmitoyl-2-arachidonoyl-GPE (16:0/20:4) levels
GCST90200055	Lactosyl-N-palmitoyl-sphingosine (d18:1/16:0) levels
GCST90200056	Sphingomyelin (d18:0/18:0, d19:0/17:0) levels
GCST90200057	1-(1-enyl-palmitoyl)-2-oleoyl-gpc (p-16:0/18:1) levels
GCST90200058	1-(1-enyl-stearoyl)-2-arachidonoyl-GPE (p-18:0/20:4) levels
GCST90200059	Behenoyl dihydrosphingomyelin (d18:0/22:0) levels
GCST90200060	1-(1-enyl-palmitoyl)-2-linoleoyl-GPC (p-16:0/18:2) levels
GCST90200061	1-(1-enyl-palmitoyl)-2-oleoyl-GPE (p-16:0/18:1) levels
GCST90200062	1-palmitoyl-2-arachidonoyl-GPI (16:0/20:4) levels
GCST90200063	1-palmitoyl-2-docosahexaenoyl-GPE (16:0/22:6) levels
GCST90200064	N-palmitoyl-sphinganine (d18:0/16:0) levels
GCST90200065	1-stearoyl-2-docosahexaenoyl-GPE (18:0/22:6) levels
GCST90200066	Gamma-tocopherol/beta-tocopherol levels
GCST90200067	1-stearoyl-2-linoleoyl-GPI (18:0/18:2) levels
GCST90200068	1,2-dilinoleoyl-GPE (18:2/18:2) levels
GCST90200069	Phenylacetylglutamate levels
GCST90200070	1-(1-enyl-palmitoyl)-2-palmitoleoyl-GPC (P-16:0/16:1) levels
GCST90200071	Palmitoylcholine levels
GCST90200072	Thioproline levels
GCST90200073	1-linoleoyl-2-arachidonoyl-GPC (18:2/20:4n6) levels
GCST90200074	1-linoleoyl-GPG (18:2) levels
GCST90200075	1-(1-enyl-palmitoyl)-2-linoleoyl-GPE (p-16:0/18:2) levels
GCST90200076	1-(1-enyl-stearoyl)-2-linoleoyl-GPE (p-18:0/18:2) levels
GCST90200077	1-stearoyl-2-oleoyl-GPI (18:0/18:1) levels
GCST90200078	1-myristoyl-2-arachidonoyl-GPC (14:0/20:4) levels
GCST90200079	1-oleoyl-2-arachidonoyl-GPE (18:1/20:4) levels
GCST90200080	1-palmitoyl-2-oleoyl-GPI (16:0/18:1) levels
GCST90200081	1-oleoyl-2-docosahexaenoyl-GPC (18:1/22:6) levels
GCST90200082	1-oleoyl-2-linoleoyl-GPE (18:1/18:2) levels
GCST90200083	1-(1-enyl-palmitoyl)-2-palmitoyl-GPC (P-16:0/16:0) levels
GCST90200084	Oleoylcholine levels
GCST90200085	Glycosyl-N-palmitoyl-sphingosine (d18:1/16:0) levels
GCST90200086	Arachidonoylcholine levels
GCST90200087	2-methylserine levels
GCST90200088	(S)-3-hydroxybutyrylcarnitine levels
GCST90200089	Methylsuccinoylcarnitine levels
GCST90200090	Dihomo-linolenoyl-choline levels
GCST90200091	Docosahexaenoylcholine levels
GCST90200092	Glycocholate glucuronide (1) levels
GCST90200093	Caffeic acid sulfate levels
GCST90200094	Ascorbic acid 2-sulfate levels
GCST90200095	1-linoleoyl-2-linolenoyl-GPC (18:2/18:3) levels
GCST90200096	Catechol glucuronide levels
GCST90200097	Furaneol sulfate levels
GCST90200098	Ceramide (d18:1/24:1) levels
GCST90200099	N-oleoylserine levels
GCST90200100	Perfluorooctanesulfonate (PFOS) levels
GCST90200101	Pimeloylcarnitine/3-methyladipoylcarnitine (C7-DC) levels
GCST90200102	1-palmitoleoyl-2-linolenoyl-GPC (16:1/18:3) levels
GCST90200103	Linoleoyl-arachidonoyl-glycerol (18:2/20:4) [1] levels
GCST90200104	Hexadecadienoate (16:2n6) levels
GCST90200105	Glycosyl-N-behenoyl-sphingadienine (d18:2/22:0) levels
GCST90200106	4-hydroxyphenylacetylglutamine levels
GCST90200107	Gamma-glutamyl-alpha-lysine levels
GCST90200108	N-palmitoyl-sphingadienine (d18:2/16:0) levels
GCST90200109	Linoleoyl-arachidonoyl-glycerol (18:2/20:4) [2] levels
GCST90200110	Palmitoleoylcarnitine (C16:1) levels
GCST90200111	N-stearoyl-sphingadienine (d18:2/18:0) levels
GCST90200112	2,3-dihydroxy-2-methylbutyrate levels
GCST90200113	Stearoylcholine levels
GCST90200114	Glycosyl-N-tricosanoyl-sphingadienine (d18:2/23:0) levels
GCST90200115	N-palmitoyl-heptadecasphingosine (d17:1/16:0) levels
GCST90200116	Ceramide (d18:1/14:0, d16:1/16:0) levels
GCST90200117	Glycosyl-N-(2-hydroxynervonoyl)-sphingosine (d18:1/24:1(2OH)) levels
GCST90200118	Glycosyl ceramide (d18:2/24:1, d18:1/24:2) levels
GCST90200119	Glycosyl ceramide (d18:1/23:1, d17:1/24:1) levels
GCST90200120	Sphingadienine levels
GCST90200121	Ceramide (d18:1/17:0, d17:1/18:0) levels
GCST90200122	Nisinate (24:6n3) levels
GCST90200123	Sphingomyelin (d18:0/20:0, d16:0/22:0) levels
GCST90200124	Sphingomyelin (d18:2/24:2) levels
GCST90200125	Sphingomyelin (d17:2/16:0, d18:2/15:0) levels
GCST90200126	Sphingomyelin (d18:2/23:1) levels
GCST90200127	Behenoylcarnitine (C22) levels
GCST90200128	Sphingomyelin (d18:2/18:1) levels
GCST90200129	Sphingomyelin (d18:2/21:0, d16:2/23:0) levels
GCST90200130	Linoleoylcholine levels
GCST90200131	Sphingomyelin (d18:1/19:0, d19:1/18:0) levels
GCST90200132	Linolenoylcarnitine (C18:3) levels
GCST90200133	Heneicosapentaenoate (21:5n3) levels
GCST90200134	Sphingomyelin (d18:1/25:0, d19:0/24:1, d20:1/23:0, d19:1/24:0) levels
GCST90200135	Arachidoylcarnitine (C20) levels
GCST90200136	Cerotoylcarnitine (C26) levels
GCST90200137	Lignoceroylcarnitine (C24) levels
GCST90200138	Docosatrienoate (22:3n6) levels
GCST90200139	Dihomo-linolenoylcarnitine (C20:3n3 or 6) levels
GCST90200140	Carotene diol (2) levels
GCST90200141	Ethyl alpha-glucopyranoside levels
GCST90200142	Carotene diol (1) levels
GCST90200143	Nervonoylcarnitine (C24:1) levels
GCST90200144	Dihomo-linoleoylcarnitine (C20:2) levels
GCST90200145	Glycosyl ceramide (d18:1/20:0, d16:1/22:0) levels
GCST90200146	Docosahexaenoylcarnitine (C22:6) levels
GCST90200147	N,N,N-trimethyl-5-aminovalerate levels
GCST90200148	Eicosenoylcarnitine (C20:1) levels
GCST90200149	Ximenoylcarnitine (C26:1) levels
GCST90200150	Arachidonoylcarnitine (C20:4) levels
GCST90200151	5-dodecenoylcarnitine (C12:1) levels
GCST90200152	2-butenoylglycine levels
GCST90200153	(N(1) + N(8))-acetylspermidine levels
GCST90200154	Hydroxy-cmpf levels
GCST90200155	2-furoylcarnitine levels
GCST90200156	Cortolone glucuronide (1) levels
GCST90200157	Carotene diol (3) levels
GCST90200158	3-hydroxyoleoylcarnitine levels
GCST90200159	Dodecenedioate (C12:1-DC) levels
GCST90200160	Trans-2-hexenoylglycine levels
GCST90200161	2-hydroxyarachidate levels
GCST90200162	3-hydroxyphenylacetoylglutamine levels
GCST90200163	Heptenedioate (C7:1-DC) levels
GCST90200164	Hexadecenedioate (C16:1-DC) levels
GCST90200165	Octadecenedioate (C18:1-DC) levels
GCST90200166	Dihydroferulic acid sulfate levels
GCST90200167	Glutamine conjugate of C7H12O2 levels
GCST90200168	Hydroxyasparagine levels
GCST90200169	Sphingomyelin (d17:1/14:0, d16:1/15:0) levels
GCST90200170	Octadecadienedioate (C18:2-DC) levels
GCST90200171	Perfluorooctanoate (PFOA) levels
GCST90200172	3-carboxy-4-methyl-5-pentyl-2-furanpropionate (3-CMPFP) levels
GCST90200173	Glutamine conjugate of C6H10O2 (2) levels
GCST90200174	3-hydroxybutyroylglycine levels
GCST90200175	Glycine conjugate of C10H14O2 (1) levels
GCST90200176	Glutamine conjugate of C6H10O2 (1) levels
GCST90200177	N-methylhydroxyproline levels
GCST90200178	Glucuronide of C10H18O2 (7) levels
GCST90200179	Glyco-beta-muricholate levels
GCST90200180	Glucuronide of C12H22O4 (1) levels
GCST90200181	N,n,n-trimethyl-alanylproline betaine (tmap) levels
GCST90200182	Glycine conjugate of C10H12O2 levels
GCST90200183	N-acetyl-2-aminooctanoate levels
GCST90200184	3-formylindole levels
GCST90200185	Gamma-glutamylcitrulline levels
GCST90200186	8-methoxykynurenate levels
GCST90200187	Tetradecadienoate (14:2) levels
GCST90200188	3-amino-2-piperidone levels
GCST90200189	Glucuronide of piperine metabolite C17H21NO3 (3) levels
GCST90200190	Dodecadienoate (12:2) levels
GCST90200191	N-lactoyl tyrosine levels
GCST90200192	N,N-dimethylalanine levels
GCST90200193	Ethyl beta-glucopyranoside levels
GCST90200194	N-lactoyl phenylalanine levels
GCST90200195	N-acetyl-isoputreanine levels
GCST90200196	2,2'-Methylenebis(6-tert-butyl-p-cresol) levels
GCST90200197	N-lactoyl isoleucine levels
GCST90200198	2-hydroxysebacate levels
GCST90200199	Ascorbic acid 3-sulfate levels
GCST90200200	N-lactoyl valine levels
GCST90200201	6-bromotryptophan levels
GCST90200202	Delta-CEHC levels
GCST90200203	Indoleacetoylcarnitine levels
GCST90200204	N-acetyl leucine levels
GCST90200205	3-indoleglyoxylic acid levels
GCST90200206	Sulfate of piperine metabolite C18H21NO3 (1) levels
GCST90200207	Methyl vanillate sulfate levels
GCST90200208	Glucuronide of piperine metabolite C17H21NO3 (4) levels
GCST90200209	Sulfate of piperine metabolite C16H19NO3 (3) levels
GCST90200210	Sulfate of piperine metabolite C16H19NO3 (2) levels
GCST90200211	3-hydroxypyridine glucuronide levels
GCST90200212	Glucuronide of piperine metabolite C17H21NO3 (5) levels
GCST90200213	2-naphthol sulfate levels
GCST90200214	11beta-hydroxyandrosterone glucuronide levels
GCST90200215	4-ethylcatechol sulfate levels
GCST90200216	Sulfate of piperine metabolite C18H21NO3 (3) levels
GCST90200217	(2,4 or 2,5)-dimethylphenol sulfate levels
GCST90200218	11beta-hydroxyetiocholanolone glucuronide levels
GCST90200219	Cholic acid glucuronide levels
GCST90200220	4-allylcatechol sulfate levels
GCST90200221	Glycoursodeoxycholic acid sulfate (1) levels
GCST90200222	Dihydrocaffeate sulfate (2) levels
GCST90200223	4-methylhexanoylglutamine levels
GCST90200224	2-ketocaprylate levels
GCST90200225	3-hydroxy-2-methylpyridine sulfate levels
GCST90200226	5-hydroxy-2-methylpyridine sulfate levels
GCST90200227	3-ethylcatechol sulfate (2) levels
GCST90200228	3-hydroxyhexanoylcarnitine (1) levels
GCST90200229	2,6-dihydroxybenzoic acid levels
GCST90200230	3-ethylcatechol sulfate (1) levels
GCST90200231	Lithocholate sulfate (1) levels
GCST90200232	4-acetylcatechol sulfate (1) levels
GCST90200233	2,3-dihydroxy-5-methylthio-4-pentenoate (dmtpa) levels
GCST90200234	Picolinoylglycine levels
GCST90200235	Succinoyltaurine levels
GCST90200236	Undecenoylcarnitine (C11:1) levels
GCST90200237	Palmitoyl-sphingosine-phosphoethanolamine (d18:1/16:0) levels
GCST90200238	Pregnenetriol disulfate levels
GCST90200239	Tetradecadienedioate (C14:2-DC) levels
GCST90200240	Hydroxy-N6,N6,N6-trimethyllysine levels
GCST90200241	Pregnenetriol sulfate levels
GCST90200242	Taurochenodeoxycholic acid 3-sulfate levels
GCST90200243	Hydroxypalmitoyl sphingomyelin (d18:1/16:0(OH)) levels
GCST90200244	5-hydroxymethyl-2-furoylcarnitine levels
GCST90200245	Eicosenedioate (C20:1-DC) levels
GCST90200246	3-hydroxydecanoylcarnitine levels
GCST90200247	Levulinoylcarnitine levels
GCST90200248	Cis 3,4-methyleneheptanoate levels
GCST90200249	Branched-chain, straight-chain, or cyclopropyl 12:1 fatty acid levels
GCST90200250	Deoxycholic acid 12-sulfate levels
GCST90200251	Branched-chain, straight-chain, or cyclopropyl 10:1 fatty acid (1) levels
GCST90200252	3,5-dichloro-2,6-dihydroxybenzoic acid levels
GCST90200253	Vanillic acid glycine levels
GCST90200254	(S)-a-amino-omega-caprolactam levels
GCST90200255	3-bromo-5-chloro-2,6-dihydroxybenzoic acid levels
GCST90200256	Dibutyl sulfosuccinate levels
GCST90200257	Metabolonic lactone sulfate levels
GCST90200258	2-hydroxy-4-(methylthio)butanoic acid levels
GCST90200259	Pentose acid levels
GCST90200260	Branched chain 14:0 dicarboxylic acid levels
GCST90200261	S-carboxyethylcysteine levels
GCST90200262	N-succinyl-phenylalanine levels
GCST90200263	(2 or 3)-decenoate (10:1n7 or n8) levels
GCST90200264	Bilirubin degradation product, C17H20N2O5 (2) levels
GCST90200265	Bilirubin degradation product, C16H18N2O5 (4) levels
GCST90200266	Cis-3,4-methyleneheptanoylcarnitine levels
GCST90200267	Tetrahydrocortisol glucuronide levels
GCST90200268	N-acetyl-2-aminoadipate levels
GCST90200269	Bilirubin degradation product, C17H20N2O5 (1) levels
GCST90200270	2-methoxyhydroquinone sulfate (1) levels
GCST90200271	Bilirubin degradation product, C16H18N2O5 (3) levels
GCST90200272	3-hydroxyoctanoylcarnitine (1) levels
GCST90200273	2-methoxyhydroquinone sulfate (2) levels
GCST90200274	Cis-3,4-methyleneheptanoylglycine levels
GCST90200275	Bilirubin degradation product, C16H18N2O5 (2) levels
GCST90200276	2,4-di-tert-butylphenol levels
GCST90200277	Bilirubin degradation product, C16H18N2O5 (1) levels
GCST90200278	3-hydroxyoctanoylcarnitine (2) levels
GCST90200279	Pantothenate levels
GCST90200280	5-oxoproline levels
GCST90200281	Phosphoethanolamine levels
GCST90200282	Picolinate levels
GCST90200283	3-ureidopropionate levels
GCST90200284	Erucate (22:1n9) levels
GCST90200285	Eicosenedioate (C20:1-DC) levels
GCST90200286	Allantoin levels
GCST90200287	N-acetylvaline levels
GCST90200288	N-acetylleucine levels
GCST90200289	N-acetylmethionine levels
GCST90200290	Glycerate levels
GCST90200291	Sarcosine levels
GCST90200292	Trans-4-hydroxyproline levels
GCST90200293	Thyroxine levels
GCST90200294	Pipecolate levels
GCST90200295	Gamma-glutamyltyrosine levels
GCST90200296	Methyl indole-3-acetate levels
GCST90200297	Ursodeoxycholate levels
GCST90200298	3-hydroxy-3-methylglutarate levels
GCST90200299	Oleoyl ethanolamide levels
GCST90200300	4-hydroxyphenylpyruvate levels
GCST90200301	Gamma-glutamylglutamine levels
GCST90200302	Alpha-tocopherol levels
GCST90200303	N-acetyl-L-alanine levels
GCST90200304	Citrate levels
GCST90200305	2-aminobutyrate levels
GCST90200306	Butyrate/isobutyrate (4:0) levels
GCST90200307	Urate levels
GCST90200308	3-hydroxyisobutyrate levels
GCST90200309	Vanillylmandelate (VMA) levels
GCST90200310	3-aminoisobutyrate levels
GCST90200311	4-acetamidobutanoate levels
GCST90200312	2-hydroxystearate levels
GCST90200313	N1-methyladenosine levels
GCST90200314	N-acetylneuraminate levels
GCST90200315	Gamma-glutamylhistidine levels
GCST90200316	N-acetylglucosaminylasparagine levels
GCST90200317	Homovanillate (hva) levels
GCST90200318	Acetoacetate levels
GCST90200319	Cys-gly, oxidized levels
GCST90200320	Dihomo-linoleate (20:2n6) levels
GCST90200321	Cholate levels
GCST90200322	Beta-hydroxyisovalerate levels
GCST90200323	Creatine levels
GCST90200324	Anthranilate levels
GCST90200325	Glycerol levels
GCST90200326	Gamma-glutamylleucine levels
GCST90200327	Choline levels
GCST90200328	3-methoxytyrosine levels
GCST90200329	3-phosphoglycerate levels
GCST90200330	1-palmitoyl-2-linoleoyl-gpc (16:0/18:2) levels
GCST90200331	1-palmitoyl-2-oleoyl-GPE (16:0/18:1) levels
GCST90200332	1-palmitoyl-2-linoleoyl-GPI (16:0/18:2) levels
GCST90200333	Taurocholic acid levels
GCST90200334	Taurodeoxycholate levels
GCST90200335	Stearoyl sphingomyelin (d18:1/18:0) levels
GCST90200336	Ceramide (d18:1/16:0) levels
GCST90200337	Taurochenodeoxycholate levels
GCST90200338	4-hydroxyphenylacetate levels
GCST90200339	5,6-dihydrothymine levels
GCST90200340	1-palmitoyl-2-oleoyl-gpc (16:0/18:1) levels
GCST90200341	N-stearoyl-sphingosine (d18:1/18:0) levels
GCST90200342	Glycochenodeoxycholate levels
GCST90200343	N-formylmethionine levels
GCST90200344	N6,n6,n6-trimethyllysine levels
GCST90200345	S-adenosylhomocysteine (SAH) levels
GCST90200346	4-acetaminophen sulfate levels
GCST90200347	2-hydroxyhippurate (salicylurate) levels
GCST90200348	Quinolinate levels
GCST90200349	Eicosapentaenoate (EPA; 20:5n3) levels
GCST90200350	Laurate (12:0) levels
GCST90200351	N-acetylputrescine levels
GCST90200352	Methylsuccinate levels
GCST90200353	9,10-DiHOME levels
GCST90200354	Linoleate (18:2n6) levels
GCST90200355	Adenosine 5'-diphosphate (ADP) levels
GCST90200356	Adenosine 5'-monophosphate (AMP) levels
GCST90200357	Adenosine 3',5'-cyclic monophosphate (camp) levels
GCST90200358	Arachidonate (20:4n6) levels
GCST90200359	5-methylthioadenosine (mta) levels
GCST90200360	Cortisone levels
GCST90200361	Beta-alanine levels
GCST90200362	Succinate levels
GCST90200363	Phosphocholine levels
GCST90200364	Cysteinylglycine levels
GCST90200365	Phenylpyruvate levels
GCST90200366	Creatinine levels
GCST90200367	3-Hydroxybutyrate levels
GCST90200368	Cholesterol levels
GCST90200369	2-hydroxyphenylacetate levels
GCST90200370	Aspartate levels
GCST90200371	3-(4-hydroxyphenyl)lactate levels
GCST90200372	Arginine levels
GCST90200373	Gluconate levels
GCST90200374	Sphinganine levels
GCST90200375	Gamma-glutamylglutamate levels
GCST90200376	Flavin adenine dinucleotide (FAD) levels
GCST90200377	Histidine levels
GCST90200378	Cortisol levels (plasma)
GCST90200379	Hypotaurine levels
GCST90200380	Glutarate (C5-DC) levels
GCST90200381	S-1-pyrroline-5-carboxylate levels
GCST90200382	Cystine levels
GCST90200383	Cystathionine levels
GCST90200384	Guanidinoacetate levels
GCST90200385	Sphingosine levels
GCST90200386	Deoxycholate levels
GCST90200387	Glycocholate levels
GCST90200388	Palmitoleate (16:1n7) levels
GCST90200389	Leucine levels
GCST90200390	Stearate (18:0) levels
GCST90200391	Methionine levels
GCST90200392	Orotate levels
GCST90200393	Phosphate levels (UKB data field 30810)
GCST90200394	Inosine levels
GCST90200395	Inosine 5'-monophosphate (IMP) levels
GCST90200396	Phenylalanine levels
GCST90200397	Palmitate (16:0) levels
GCST90200398	Malate levels
GCST90200399	Isoleucine levels
GCST90200400	Nicotinamide levels
GCST90200401	Myo-inositol levels
GCST90200402	Lysine levels
GCST90200403	Citrulline levels
GCST90200404	Ornithine levels
GCST90200405	Retinol (Vitamin A) levels
GCST90200406	1-methylnicotinamide levels
GCST90200407	Uridine levels
GCST90200408	Plasma lactate levels
GCST90200409	Pristanate levels
GCST90200410	Phytanate levels
GCST90200411	Plasma free proline levels
GCST90200412	Glutamate levels
GCST90200413	2'-deoxyuridine levels
GCST90200414	Myristate (14:0) levels
GCST90200415	Serine levels
GCST90200416	Trans-urocanate levels
GCST90200417	Urea levels
GCST90200418	Pyridoxal levels
GCST90200419	Glutamine levels
GCST90200420	Taurine levels
GCST90200421	Salicylate levels
GCST90200422	Serotonin levels
GCST90200423	Spermidine levels
GCST90200424	Dimethylglycine levels
GCST90200425	Betaine levels
GCST90200426	Xylose levels
GCST90200427	Tyrosine levels
GCST90200428	Caprate (10:0) levels
GCST90200429	Cytidine levels
GCST90200430	Pyruvate levels
GCST90200431	Alanine levels
GCST90200432	Threonine levels
GCST90200433	Cytosine levels
GCST90200434	12,13-DiHOME levels
GCST90200435	Mannose levels
GCST90200436	Caffeine levels
GCST90200437	Fructose levels
GCST90200438	Alpha-ketobutyrate levels
GCST90200439	Cysteine levels
GCST90200440	Blood sugar levels
GCST90200441	Tryptophan levels
GCST90200442	Valine levels
GCST90200443	Pseudouridine levels
GCST90200444	Dihydroorotate levels
GCST90200445	Caprylate (8:0) levels
GCST90200446	Arachidate (20:0) levels
GCST90200447	Maltose levels in coronary artery disease
GCST90200448	N-stearoyl-sphinganine (d18:0/18:0) levels
GCST90200449	Sucrose levels
GCST90200450	Caproate (6:0) levels
GCST90200451	Nonadecanoate (19:0) levels
GCST90200452	Plasma free asparagine levels
GCST90200453	X-07765 levels
GCST90200454	Kynurenate levels
GCST90200455	Alpha-ketoglutarate levels
GCST90200456	X-11308 levels
GCST90200457	Pentadecanoate (15:0) levels
GCST90200458	X-11315 levels
GCST90200459	Margarate (17:0) levels
GCST90200460	X-11372 levels
GCST90200461	X-10458 levels
GCST90200462	X-11299 levels
GCST90200463	X-11478 levels
GCST90200464	X-11849 levels
GCST90200465	X-11787 levels
GCST90200466	X-11632 levels
GCST90200467	X-11852 levels
GCST90200468	X-11847 levels
GCST90200469	X-11483 levels
GCST90200470	X-11470 levels
GCST90200471	X-11381 levels
GCST90200472	X-11850 levels
GCST90200473	X-11795 levels
GCST90200474	X-11444 levels
GCST90200475	X-11858 levels
GCST90200476	X-11843 levels
GCST90200477	X-12127 levels
GCST90200478	X-12221 levels
GCST90200479	X-12283 levels
GCST90200480	X-12410 levels
GCST90200481	X-12104 levels
GCST90200482	X-12193 levels
GCST90200483	X-12216 levels
GCST90200484	X-12306 levels
GCST90200485	X-12100 levels
GCST90200486	X-12261 levels
GCST90200487	X-11880 levels
GCST90200488	X-12117 levels
GCST90200489	X-12407 levels
GCST90200490	X-12101 levels
GCST90200491	X-12026 levels
GCST90200492	X-12411 levels
GCST90200493	X-12013 levels
GCST90200494	X-12007 levels
GCST90200495	X-12462 levels
GCST90200496	X-12714 levels
GCST90200497	X-12740 levels
GCST90200498	X-12730 levels
GCST90200499	X-12701 levels
GCST90200500	X-12816 levels
GCST90200501	X-12731 levels
GCST90200502	X-12707 levels
GCST90200503	X-12729 levels
GCST90200504	X-12830 levels
GCST90200505	X-12818 levels
GCST90200506	X-12812 levels
GCST90200507	X-12822 levels
GCST90200508	X-12738 levels
GCST90200509	X-12544 levels
GCST90200510	X-12680 levels
GCST90200511	X-12906 levels
GCST90200512	X-13684 levels
GCST90200513	X-13507 levels
GCST90200514	X-12851 levels
GCST90200515	X-12849 levels
GCST90200516	X-12847 levels
GCST90200517	X-13553 levels
GCST90200518	X-12839 levels
GCST90200519	X-13729 levels
GCST90200520	X-13007 levels
GCST90200521	X-13844 levels
GCST90200522	X-13728 levels
GCST90200523	X-12844 levels
GCST90200524	X-13695 levels
GCST90200525	X-13723 levels
GCST90200526	X-14056 levels
GCST90200527	X-13866 levels
GCST90200528	X-17146 levels
GCST90200529	X-16397 levels
GCST90200530	X-17335 levels
GCST90200531	X-16964 levels
GCST90200532	X-16935 levels
GCST90200533	X-15486 levels
GCST90200534	X-16580 levels
GCST90200535	X-17325 levels
GCST90200536	X-17328 levels
GCST90200537	X-16087 levels
GCST90200538	X-17010 levels
GCST90200539	X-14939 levels
GCST90200540	X-15461 levels
GCST90200541	X-15523 levels
GCST90200542	X-15728 levels
GCST90200543	X-15503 levels
GCST90200544	X-16124 levels
GCST90200545	X-17438 levels
GCST90200546	X-17354 levels
GCST90200547	X-17654 levels
GCST90200548	X-17676 levels
GCST90200549	X-17367 levels
GCST90200550	X-17357 levels
GCST90200551	X-18886 levels
GCST90200552	X-18887 levels
GCST90200553	X-17653 levels
GCST90200554	X-17346 levels
GCST90200555	X-17690 levels
GCST90200556	X-18345 levels
GCST90200557	X-17685 levels
GCST90200558	X-18888 levels
GCST90200559	X-18901 levels
GCST90200560	X-17351 levels
GCST90200561	X-18779 levels
GCST90200562	X-21286 levels
GCST90200563	X-21355 levels
GCST90200564	X-21319 levels
GCST90200565	X-21258 levels
GCST90200566	X-21364 levels
GCST90200567	X-21353 levels
GCST90200568	X-19438 levels
GCST90200569	X-18913 levels
GCST90200570	X-18921 levels
GCST90200571	X-21339 levels
GCST90200572	X-19299 levels
GCST90200573	X-18935 levels
GCST90200574	X-21310 levels
GCST90200575	X-21283 levels
GCST90200576	X-21285 levels
GCST90200577	X-21312 levels
GCST90200578	X-18922 levels
GCST90200579	X-21442 levels
GCST90200580	X-21796 levels
GCST90200581	X-21441 levels
GCST90200582	X-21752 levels
GCST90200583	X-21807 levels
GCST90200584	X-21736 levels
GCST90200585	X-21829 levels
GCST90200586	X-21471 levels
GCST90200587	X-21733 levels
GCST90200588	X-21742 levels
GCST90200589	X-21821 levels
GCST90200590	X-21470 levels
GCST90200591	X-21383 levels
GCST90200592	X-21607 levels
GCST90200593	X-21834 levels
GCST90200594	X-21467 levels
GCST90200595	X-22776 levels
GCST90200596	X-23655 levels
GCST90200597	X-22834 levels
GCST90200598	X-22771 levels
GCST90200599	X-23639 levels
GCST90200600	X-23648 levels
GCST90200601	X-23654 levels
GCST90200602	X-22520 levels
GCST90200603	X-23641 levels
GCST90200604	X-23276 levels
GCST90200605	X-21845 levels
GCST90200606	X-22509 levels
GCST90200607	X-23644 levels
GCST90200608	X-22162 levels
GCST90200609	X-23587 levels
GCST90200610	X-23593 levels
GCST90200611	X-23636 levels
GCST90200612	X-23678 levels
GCST90200613	X-23680 levels
GCST90200614	X-23780 levels
GCST90200615	X-23974 levels
GCST90200616	X-23659 levels
GCST90200617	X-23665 levels
GCST90200618	X-23782 levels
GCST90200619	X-24295 levels
GCST90200620	X-24243 levels
GCST90200621	X-23739 levels
GCST90200622	X-23997 levels
GCST90200623	X-24241 levels
GCST90200624	X-24328 levels
GCST90200625	X-24456 levels
GCST90200626	X-24418 levels
GCST90200627	X-24344 levels
GCST90200628	X-24556 levels
GCST90200629	X-24337 levels
GCST90200630	X-24546 levels
GCST90200631	X-24306 levels
GCST90200632	X-24307 levels
GCST90200633	X-24334 levels
GCST90200634	X-24518 levels
GCST90200635	X-24494 levels
GCST90200636	X-24544 levels
GCST90200637	X-24531 levels
GCST90200638	X-24811 levels
GCST90200639	X-24757 levels
GCST90200640	X-24978 levels
GCST90200641	X-24970 levels
GCST90200642	X-24795 levels
GCST90200643	X-24951 levels
GCST90200644	X-24728 levels
GCST90200645	X-24565 levels
GCST90200646	X-24801 levels
GCST90200647	X-24736 levels
GCST90200648	X-24585 levels
GCST90200649	X-24588 levels
GCST90200650	X-25109 levels
GCST90200651	X-24947 levels
GCST90200652	X-24949 levels
GCST90200653	X-24812 levels
GCST90200654	X-25217 levels
GCST90200655	X-25828 levels
GCST90200656	X-25371 levels
GCST90200657	X-25419 levels
GCST90200658	X-25265 levels
GCST90200659	X-25172 levels
GCST90200660	X-25957 levels
GCST90200661	X-25422 levels
GCST90200662	X-25790 levels
GCST90200663	X-25420 levels
GCST90200664	X-25810 levels
GCST90200665	X-25433 levels
GCST90200666	X-25343 levels
GCST90200667	X-25271 levels
GCST90200668	X-25520 levels
GCST90200669	X-25519 levels
GCST90200670	X-26111 levels
GCST90200671	X-26109 levels
GCST90200672	X-26054 levels
GCST90200673	Carnitine C4 levels
GCST90200674	Androsterone sulfate levels
GCST90200675	N-acetyltyrosine levels
GCST90200676	N-acetyl-L-glutamine levels
GCST90200677	N-acetylphenylalanine levels
GCST90200678	N-acetylasparagine levels
GCST90200679	N-acetylarginine levels
GCST90200680	5-acetylamino-6-formylamino-3-methyluracil levels
GCST90200681	Orotidine levels
GCST90200682	3-methylcytidine levels
GCST90200683	N-acetylcitrulline levels
GCST90200684	N-acetyl-aspartyl-glutamate (naag) levels
GCST90200685	1-stearoyl-2-arachidonoyl-gpc (18:0/20:4) levels
GCST90200686	Bilirubin (E,E) levels
GCST90200687	Bilirubin (E,Z or Z,E) levels
GCST90200688	Androsterone glucuronide levels
GCST90200689	N6-methyllysine levels
GCST90200690	N-acetyl-1-methylhistidine levels
GCST90200691	N-delta-acetylornithine levels
GCST90200692	1-palmitoyl-2-arachidonoyl-gpc (16:0/20:4n6) levels
GCST90200693	Glycochenodeoxycholate glucuronide (1) levels
GCST90200694	2'-o-methylcytidine levels
GCST90200695	2'-o-methyluridine levels
GCST90200696	N6,N6-dimethyllysine levels
GCST90200697	N2-acetyl,N6,N6-dimethyllysine levels
GCST90200698	N2-acetyl,N6-methyllysine levels
GCST90200699	Deoxycholic acid glucuronide levels
GCST90200700	Decadienedioic acid (C10:2-DC) levels
GCST90200701	Bilirubin degradation product, C17H18N2O4 (1) levels
GCST90200702	Bilirubin degradation product, C17H18N2O4 (2) levels
GCST90200703	Bilirubin degradation product, C17H18N2O4 (3) levels
GCST90200704	Bilirubin (z,z) levels
GCST90200705	Ethylmalonate levels
GCST90200706	Biliverdin levels
GCST90200707	Glycine levels
GCST90200708	X-12112 levels
GCST90200709	X-12798 levels
GCST90200710	X-13431 levels
GCST90200711	X-19141 levels
GCST90200712	Spermidine to 5-methylthioadenosine (MTA) ratio
GCST90200713	Spermidine to ornithine ratio
GCST90200714	Alpha-ketoglutarate to alpha-ketobutyrate ratio
GCST90200715	Alpha-ketoglutarate to glutamate ratio
GCST90200716	Adenosine 5'-diphosphate (ADP) to phosphoethanolamine ratio
GCST90200717	3-phosphoglycerate to adenosine 5'-diphosphate (ADP) ratio
GCST90200718	Alpha-ketoglutarate to succinate ratio
GCST90200719	Adenosine 3',5'-cyclic monophosphate (cAMP) to adenosine 5'-monophosphate (AMP) ratio
GCST90200720	Adenosine 5'-diphosphate (ADP) to pantothenate ratio
GCST90200721	Adenosine 5'-diphosphate (ADP) to phosphate ratio
GCST90200722	S-adenosylhomocysteine (SAH) to leucine ratio
GCST90200723	S-adenosylhomocysteine (SAH) to 5-methyluridine (ribothymidine) ratio
GCST90200724	Cholate to taurocholate ratio
GCST90200725	Adenosine 5'-diphosphate (ADP) to creatine ratio
GCST90200726	N-acetylputrescine to (N(1) + N(8))-acetylspermidine ratio
GCST90200727	Adenosine 3',5'-cyclic monophosphate (cAMP) to taurocholate ratio
GCST90200728	Adenosine 5'-diphosphate (ADP) to Adenosine 5'-monophosphate (AMP) ratio
GCST90200729	3-phosphoglycerate to phosphate ratio
GCST90200730	Adenosine 5'-diphosphate (ADP) to fructose ratio
GCST90200731	Adenosine 5'-diphosphate (ADP) to mannose ratio
GCST90200732	Adenosine 5'-diphosphate (ADP) to tyrosine ratio
GCST90200733	Adenosine 5'-diphosphate (ADP) to N-acetylglucosamine to N-acetylgalactosamine ratio
GCST90200734	Adenosine 5'-monophosphate (AMP) to palmitate (16:0) ratio
GCST90200735	Arginine to ornithine ratio
GCST90200736	Adenosine 5'-diphosphate (ADP) to arginine ratio
GCST90200737	Adenosine 5'-diphosphate (ADP) to 2'-deoxyuridine ratio
GCST90200738	Adenosine 5'-monophosphate (AMP) to inosine 5'-monophosphate (IMP) ratio
GCST90200739	Adenosine 5'-monophosphate (AMP) to proline ratio
GCST90200740	Arachidonate (20:4n6) to oleate to vaccenate (18:1) ratio
GCST90200741	Adenosine 5'-monophosphate (AMP) to alanine ratio
GCST90200742	Aspartate to citrate ratio
GCST90200743	Arginine to citrulline ratio
GCST90200744	Arginine to glutamate ratio
GCST90200745	Adenosine 5'-monophosphate (AMP) to phenylalanine ratio
GCST90200746	Adenosine 5'-diphosphate (ADP) to gluconate ratio
GCST90200747	Adenosine 5'-monophosphate (AMP) to phosphate ratio
GCST90200748	Aspartate to glutamate ratio
GCST90200749	Arachidonate (20:4n6) to pyruvate ratio
GCST90200750	Aspartate to asparagine ratio
GCST90200751	Cortisone to cortisol ratio
GCST90200752	Succinate to acetoacetate ratio
GCST90200753	Aspartate to citrulline ratio
GCST90200754	Sphingosine to phosphate ratio
GCST90200755	Inosine 5'-monophosphate (IMP) to phosphate ratio
GCST90200756	Glycine to pyridoxal ratio
GCST90200757	Glycine to alanine ratio
GCST90200758	Glycine to serine ratio
GCST90200759	Histidine to trans-urocanate ratio
GCST90200760	Methionine to methionine sulfoxide ratio
GCST90200761	Citrulline to dimethylarginine (SDMA + ADMA) ratio
GCST90200762	Palmitate (16:0) to myristate (14:0) ratio
GCST90200763	Phosphate to N-acetylneuraminate ratio
GCST90200764	Phosphate to uridine ratio
GCST90200765	Phosphate to alanine ratio
GCST90200766	Phosphate to phosphoethanolamine ratio
GCST90200767	Phosphate to glucose ratio
GCST90200768	Phosphate to 2'-deoxyuridine ratio
GCST90200769	Phosphate to mannose ratio
GCST90200770	Phenylalanine to tyrosine ratio
GCST90200771	Phosphate to fructose ratio
GCST90200772	Phosphate to citrate ratio
GCST90200773	Serine to alpha-tocopherol ratio
GCST90200774	Uridine to pseudouridine ratio
GCST90200775	Serine to pyruvate ratio
GCST90200776	Glutamate to glutamine ratio
GCST90200777	Uridine to cytidine ratio
GCST90200778	Pyruvate to 3-methyl-2-oxobutyrate ratio
GCST90200779	Pyruvate to N-acetylneuraminate ratio
GCST90200780	Alanine to pyruvate ratio
GCST90200781	Glucose to maltose ratio
GCST90200782	Mannose to trans-4-hydroxyproline ratio
GCST90200783	Mannose to S-methylcysteine ratio
GCST90200784	Glutamate to cysteine ratio
GCST90200785	Cysteine to 5-oxoproline ratio
GCST90200786	Cysteine to alanine ratio
GCST90200787	Glutamine to asparagine ratio
GCST90200788	5-oxoproline to citrate ratio
GCST90200789	Alpha-tocopherol to sulfate ratio
GCST90200790	Thyroxine to taurocholate ratio
GCST90200791	Creatine to carnitine ratio
GCST90200792	Carnitine to palmitoylcarnitine (C16) ratio
GCST90200793	Glycolithocholate to glycolithocholate sulfate ratio
GCST90200794	Oleoyl-linoleoyl-glycerol (18:1 to 18:2) [2] to linoleoyl-arachidonoyl-glycerol (18:2 to 20:4) [1] ratio
GCST90200795	Oleoyl-linoleoyl-glycerol (18:1 to 18:2) [2] to linoleoyl-arachidonoyl-glycerol (18:2 to 20:4) [2] ratio
GCST90200796	Spermidine to (N(1) + N(8))-acetylspermidine ratio
GCST90200797	Spermidine to N-acetylputrescine ratio
GCST90200798	Dopamine 4-sulfate to dopamine 3-O-sulfate ratio
GCST90200799	Spermidine to adenosine 5'-diphosphate (ADP) ratio
GCST90200800	Spermidine to histidine ratio
GCST90200801	5-methylthioadenosine (MTA) to phosphate ratio
GCST90200802	Histidine to pyruvate ratio
GCST90200803	Spermidine to phosphate ratio
GCST90200804	Spermidine to pyruvate ratio
GCST90200805	Spermidine to carnitine ratio
GCST90200806	Spermidine to ergothioneine ratio
GCST90200807	Carnitine to ergothioneine ratio
GCST90200808	Spermidine to choline ratio
GCST90200809	Spermidine to taurocholate ratio
GCST90200810	Alpha-ketoglutarate to kynurenine ratio
GCST90200811	Choline to taurocholate ratio
GCST90200812	Glutamate to kynurenine ratio
GCST90200813	Ornithine to glutamate ratio
GCST90200814	Alpha-ketoglutarate to ornithine ratio
GCST90200815	3-hydroxyisobutyrate to adenosine 5'-diphosphate (ADP) ratio
GCST90200816	Alpha-ketoglutarate to aspartate ratio
GCST90200817	3-hydroxyisobutyrate to phosphate ratio
GCST90200818	Adenosine 5'-diphosphate (ADP) to glycerate ratio
GCST90200819	3-phosphoglycerate to glycerate ratio
GCST90200820	Adenosine 5'-diphosphate (ADP) to valine ratio
GCST90200821	Adenosine 5'-diphosphate (ADP) to glycine ratio
GCST90200822	Phosphate to valine ratio
GCST90200823	Adenosine 5'-diphosphate (ADP) to N-palmitoyl-sphingosine (d18:1 to 16:0) ratio
GCST90200824	Adenosine 5'-diphosphate (ADP) to sulfate ratio
GCST90200825	Phosphate to sulfate ratio
GCST90200826	Glycine to phosphate ratio
GCST90200827	Phosphate to N-palmitoyl-sphingosine (d18:1 to 16:0) ratio
GCST90200828	Cholate to bilirubin (Z,Z) ratio
GCST90200829	Bilirubin (Z,Z) to taurocholate ratio
GCST90200830	Cholate to adenosine 3',5'-cyclic monophosphate (cAMP) ratio
GCST90200831	Cholate to phosphate ratio
GCST90200832	Adenosine 5'-diphosphate (ADP) to citrate ratio
GCST90200833	Cholate to adenosine 5'-monophosphate (AMP) ratio
GCST90200834	Adenosine 5'-diphosphate (ADP) to glycerol 3-phosphate ratio
GCST90200835	Adenosine 5'-diphosphate (ADP) to glycerol ratio
GCST90200836	Glycerol to glycerol 3-phosphate ratio
GCST90200837	Adenosine 5'-diphosphate (ADP) to glutamate ratio
GCST90200838	Phosphate to glutamate ratio
GCST90200839	Adenosine 5'-diphosphate (ADP) to aspartate ratio
GCST90200840	Adenosine 5'-diphosphate (ADP) to flavin adenine dinucleotide (FAD) ratio
GCST90200841	Adenosine 5'-diphosphate (ADP) to oxalate (ethanedioate) ratio
GCST90200842	Citrate to oxalate (ethanedioate) ratio
GCST90200843	Adenosine 5'-monophosphate (AMP) to flavin adenine dinucleotide (FAD) ratio
GCST90200844	Aspartate to phosphate ratio
GCST90200845	Adenosine 5'-monophosphate (AMP) to citrate ratio
GCST90200846	Phenylalanine to phosphate ratio
GCST90200847	Phosphate to tryptophan ratio
GCST90200848	Adenosine 5'-monophosphate (AMP) to glutamine ratio
GCST90200849	Adenosine 5'-monophosphate (AMP) to threonine ratio
GCST90200850	Adenosine 5'-monophosphate (AMP) to tryptophan ratio
GCST90200851	Adenosine 5'-monophosphate (AMP) to glycine ratio
GCST90200852	Adenosine 5'-monophosphate (AMP) to arginine ratio
GCST90200853	Adenosine 5'-monophosphate (AMP) to tyrosine ratio
GCST90200854	Arginine to phosphate ratio
GCST90200855	Phosphate to threonine ratio
GCST90200856	Phosphate to glutamine ratio
GCST90200857	Adenosine 5'-monophosphate (AMP) to aspartate ratio
GCST90200858	Phosphate to tyrosine ratio
GCST90200859	Adenosine 5'-monophosphate (AMP) to asparagine ratio
GCST90200860	Adenosine 5'-monophosphate (AMP) to serine ratio
GCST90200861	Histidine to phosphate ratio
GCST90200862	Adenosine 5'-monophosphate (AMP) to methionine ratio
GCST90200863	Phosphate to serine ratio
GCST90200864	Methionine to phosphate ratio
GCST90200865	Adenosine 5'-monophosphate (AMP) to histidine ratio
GCST90200866	phosphate to asparagine ratio
GCST90200867	Adenosine 5'-monophosphate (AMP) to isoleucine ratio
GCST90200868	Isoleucine to phosphate ratio
GCST90200869	Adenosine 5'-monophosphate (AMP) to valine ratio
GCST90200870	Adenosine 5'-monophosphate (AMP) to acetoacetate ratio
GCST90200871	Adenosine 5'-monophosphate (AMP) to cysteine ratio
GCST90200872	Phosphate to cysteine ratio
GCST90200873	Cortisol to 4-cholesten-3-one ratio
GCST90200874	Cysteinylglycine to taurine ratio
GCST90200875	Cysteinylglycine to glutamate ratio
GCST90200876	Cortisone to 4-cholesten-3-one ratio
GCST90200877	Taurine to glutamate ratio
GCST90200878	Glutarate (C5-DC) to caprylate (8:0) ratio
GCST90200879	Adenosine 5'-monophosphate (AMP) to glutamate ratio
GCST90200880	Glutarate (C5-DC) to salicylate ratio
GCST90200881	Aspartate to N-acetylglucosamine to N-acetylgalactosamine ratio
GCST90200882	Aspartate to mannose ratio
GCST90200883	Phosphate to acetoacetate ratio
GCST90200884	Mannose to N-acetylglucosamine to N-acetylgalactosamine ratio
GCST90200885	Phenylpyruvate to citrate ratio
GCST90200886	Phenylpyruvate to 4-hydroxyphenylpyruvate ratio
GCST90200887	Cholesterol to cortisol ratio
GCST90200888	Citrate to 4-hydroxyphenylpyruvate ratio
GCST90200889	Cholesterol to taurocholate ratio
GCST90200890	Cortisol to taurocholate ratio
GCST90200891	Salicylate to caprylate (8:0) ratio
GCST90200892	Hypotaurine to taurine ratio
GCST90200893	Taurine to cysteine ratio
GCST90200894	Inosine to theophylline ratio
GCST90200895	Hypotaurine to cysteine ratio
GCST90200896	Inosine to EDTA ratio
GCST90200897	Theophylline to EDTA ratio
GCST90200898	Citrulline to phosphate ratio
GCST90200899	Citrulline to ornithine ratio
GCST90200900	Phosphate to oleoyl-linoleoyl-glycerol (18:1 to 18:2) [2] ratio
GCST90200901	Ornithine to phosphate ratio
GCST90200902	Phosphate to linoleoyl-arachidonoyl-glycerol (18:2 to 20:4) [2] ratio
GCST90200903	Phosphate to glycerol ratio
GCST90200904	Phosphate to linoleoyl-arachidonoyl-glycerol (18:2 to 20:4) [1] ratio
GCST90200905	Glucose to glycerol ratio
GCST90200906	2'-deoxyuridine to cytidine ratio
GCST90200907	Retinol (Vitamin A) to linoleoyl-arachidonoyl-glycerol (18:2 to 20:4) [1] ratio
GCST90200908	Retinol (Vitamin A) to linoleoyl-arachidonoyl-glycerol (18:2 to 20:4) [2] ratio
GCST90200909	Uridine to 2'-deoxyuridine ratio
GCST90200910	Retinol (Vitamin A) to oleoyl-linoleoyl-glycerol (18:1 to 18:2) [2] ratio
GCST90200911	Tryptophan to pyruvate ratio
GCST90200912	tryptophan to tyrosine ratio
GCST90200913	Glucose to sucrose ratio
GCST90200914	Tyrosine to pyruvate ratio
GCST90200915	Glucose to fructose ratio
GCST90200916	Fructose to sucrose ratio
GCST90200917	Alpha-ketobutyrate to 3-methyl-2-oxobutyrate ratio
GCST90200918	N-palmitoyl-sphingosine (d18:1 to 16:0) to N-palmitoyl-sphinganine (d18:0 to 16:0) ratio
GCST90200919	Caffeine to theophylline ratio
GCST90200920	Mannose to glycerol ratio
GCST90200921	Mannose to mannitol to sorbitol ratio
GCST90200922	Alpha-ketobutyrate to pyruvate ratio
GCST90200923	Glycerol to mannitol to sorbitol ratio
GCST90200924	Alpha-tocopherol to glycerol ratio
GCST90200925	Caffeine to theobromine ratio
GCST90200926	N-stearoyl-sphingosine (d18:1 to 18:0) to N-palmitoyl-sphinganine (d18:0 to 16:0) ratio
GCST90200927	Theophylline to theobromine ratio
GCST90200928	N-palmitoyl-sphingosine (d18:1 to 16:0) to N-stearoyl-sphingosine (d18:1 to 18:0) ratio
GCST90200929	Glycerol to carnitine ratio
GCST90200930	Carnitine to acetylcarnitine (C2) ratio
GCST90200931	Glycerol to sulfate ratio
GCST90200932	Glycerol to palmitoylcarnitine (C16) ratio
GCST90200933	Alpha-ketoglutarate to proline ratio
GCST90200934	Acetylcarnitine (C2) to propionylcarnitine (C3) ratio
GCST90200935	Carnitine to propionylcarnitine (C3) ratio
GCST90200936	Succinate to proline ratio
GCST90200937	Alpha-ketoglutarate to trans-4-hydroxyproline ratio
GCST90200938	Alpha-ketoglutarate to alanine ratio
GCST90200939	Proline to trans-4-hydroxyproline ratio
GCST90200940	Adenosine 5'-diphosphate (ADP) to EDTA ratio
GCST90200941	Succinate to trans-4-hydroxyproline ratio
GCST90200942	Glutamate to pyruvate ratio
GCST90200943	Phosphate to EDTA ratio
GCST90200944	Alpha-ketoglutarate to pyruvate ratio
GCST90200945	Adenosine 5'-monophosphate (AMP) to EDTA ratio
GCST90200946	Glutamate to alanine ratio
GCST90200947	Adenosine 5'-diphosphate (ADP) to glucose ratio
GCST90200948	Adenosine 5'-diphosphate (ADP) to mannitol to sorbitol ratio
GCST90200949	Adenosine 5'-diphosphate (ADP) to N-acetylneuraminate ratio
GCST90200950	Glucose to mannitol to sorbitol ratio
GCST90200951	Mannose to fructose ratio
GCST90200952	Adenosine 5'-diphosphate (ADP) to cytidine ratio
GCST90200953	Glucose-to-mannose ratio
GCST90200954	Cytidine to N-acetylneuraminate ratio
GCST90200955	Adenosine 5'-diphosphate (ADP) to choline phosphate ratio
GCST90200956	Cytidine to N-acetylglucosamine to N-acetylgalactosamine ratio
GCST90200957	N-acetylneuraminate to N-acetylglucosamine to N-acetylgalactosamine ratio
GCST90200958	Adenosine 5'-diphosphate (ADP) to choline ratio
GCST90200959	Choline phosphate to choline ratio
GCST90200960	Choline phosphate to phosphoethanolamine ratio
GCST90200961	Adenosine 5'-diphosphate (ADP) to ornithine ratio
GCST90200962	Adenosine 5'-diphosphate (ADP) to glutamine ratio
GCST90200963	Inosine 5'-monophosphate (IMP) to urate ratio
GCST90200964	Adenosine 5'-diphosphate (ADP) to 5-oxoproline ratio
GCST90200965	Glutamate to 5-oxoproline ratio
GCST90200966	Adenosine 5'-diphosphate (ADP) to uridine ratio
GCST90200967	Phosphate to urate ratio
GCST90200968	Phosphate to 5-oxoproline ratio
GCST90200969	Adenosine 5'-monophosphate (AMP) to N-palmitoyl-sphingosine (d18:1 to 16:0) ratio
GCST90200970	Adenosine 5'-monophosphate (AMP) to leucine ratio
GCST90200971	Leucine to phosphate ratio
GCST90200972	Leucine to N-palmitoyl-sphingosine (d18:1 to 16:0) ratio
GCST90200973	Proline to glutamate ratio
GCST90200974	Phosphate to proline ratio
GCST90200975	Arachidonate (20:4n6) to caffeine ratio
GCST90200976	Adenosine 5'-monophosphate (AMP) to urate ratio
GCST90200977	Arachidonate (20:4n6) to paraxanthine ratio
GCST90200978	Caffeine to paraxanthine ratio
GCST90200979	Arachidonate (20:4n6) to linoleate (18:2n6) ratio
GCST90200980	Phosphoethanolamine to choline ratio
GCST90200981	Caffeine to linoleate (18:2n6) ratio
GCST90200982	Paraxanthine to linoleate (18:2n6) ratio
GCST90200983	Cholesterol to linoleoyl-arachidonoyl-glycerol (18:2 to 20:4) [1] ratio
GCST90200984	Cholesterol to benzoate ratio
GCST90200985	Cholesterol to oleoyl-linoleoyl-glycerol (18:1 to 18:2) [2] ratio
GCST90200986	Cholesterol to linoleoyl-arachidonoyl-glycerol (18:2 to 20:4) [2] ratio
GCST90200987	Benzoate to oleoyl-linoleoyl-glycerol (18:1 to 18:2) [2] ratio
GCST90200988	Benzoate to linoleoyl-arachidonoyl-glycerol (18:2 to 20:4) [1] ratio
GCST90200989	Histidine to asparagine ratio
GCST90200990	Benzoate to linoleoyl-arachidonoyl-glycerol (18:2 to 20:4) [2] ratio
GCST90200991	Histidine to alanine ratio
GCST90200992	Alanine to asparagine ratio
GCST90200993	Salicylate to oxalate (ethanedioate) ratio
GCST90200994	Glutamine to alanine ratio
GCST90200995	Salicylate to taurocholate ratio
GCST90200996	Citrate to taurocholate ratio
GCST90200997	Histidine to glutamine ratio
GCST90200998	Salicylate to citrate ratio
GCST90200999	Taurocholate to oxalate (ethanedioate) ratio
GCST90201000	Serine to threonine ratio
GCST90201001	Serine to alpha-ketobutyrate ratio
GCST90201002	Maltose to sucrose ratio
GCST90201003	Glucose to N-palmitoyl-sphingosine (d18:1 to 16:0) ratio
GCST90201004	Glucose to N-stearoyl-sphingosine (d18:1 to 18:0) ratio
GCST90201005	Fructose to maltose ratio
GCST90201006	Alpha-ketobutyrate to 3-methyl-2-oxovalerate ratio
GCST90201007	Glucose to N-palmitoyl-sphinganine (d18:0 to 16:0) ratio
GCST90201008	Threonine to alpha-ketobutyrate ratio
GCST90201009	Threonine to pyruvate ratio
GCST90201010	Alpha-ketobutyrate to 4-methyl-2-oxopentanoate ratio
GCST90201011	3-methyl-2-oxovalerate to 4-methyl-2-oxopentanoate ratio
GCST90201012	3-methyl-2-oxovalerate to 3-methyl-2-oxobutyrate ratio
GCST90201013	Androsterone glucuronide to etiocholanolone glucuronide ratio
GCST90201014	Glucuronate to androsterone glucuronide ratio
GCST90201015	Bilirubin (Z,Z) to androsterone glucuronide ratio
GCST90201016	Bilirubin (Z,Z) to etiocholanolone glucuronide ratio
GCST90201017	4-methyl-2-oxopentanoate to 3-methyl-2-oxobutyrate ratio
GCST90201018	Bilirubin (Z,Z) to glucuronate ratio
GCST90201019	Glucuronate to etiocholanolone glucuronide ratio
GCST90201020	Paraxanthine to 5-acetylamino-6-formylamino-3-methyluracil ratio

## Sheet: Sheet2
Supplementary Table S2: Mendelian Randomization Estimates and Sensitivity Analysis Results in Coronary Heart Disease Analysis.
SNP	effect_allele.exposure	other_allele.exposure	effect_allele.outcome	other_allele.outcome	beta.exposure	beta.outcome	eaf.exposure	eaf.outcome	remove	palindromic	ambiguous	id.outcome	chr	pos	se.outcome	samplesize.outcome	pval.outcome	outcome	originalname.outcome	outcome.deprecated	mr_keep.outcome	data_source.outcome	chr.exposure	pos.exposure	se.exposure	pval.exposure	id.exposure	exposure	samplesize.exposure	action	mr_keep	units.outcome	units.exposure	rsq.exposure	effective_n.exposure	rsq.outcome	effective_n.outcome	steiger_dir	steiger_pval	R2	F	FMean	F_pow_beta_se
rs10006723	T	G	T	G	0.170956	-0.059542	0.052858	0.038845	FALSE	FALSE	FALSE	ieu-a-7	4	102673734	0.0287961	184305	0.0386678	Coronary heart disease || id:ieu-a-7	Coronary heart disease	Coronary heart disease || ||	TRUE	igd	4	101752577	0.0345341	7.40711e-07	GCST90199621	Carnitine levels	8192	2	TRUE			0.00298326	8192	2.31973e-05	184305	TRUE	1.01139e-05	0.00292634	24.0371	29.788	24.506
rs10826332	A	T	A	T	-0.142187	0.027913	0.0770596	0.095613	FALSE	TRUE	FALSE	ieu-a-7	10	61380266	0.0157673	184305	0.0766761	Coronary heart disease || id:ieu-a-7	Coronary heart disease	Coronary heart disease || ||	TRUE	igd	10	59620508	0.0286481	6.9336e-07	GCST90199621	Carnitine levels	8192	2	TRUE			0.00299875	8192	1.70043e-05	184305	TRUE	7.16794e-06	0.00287574	23.6203	29.788	24.6336
rs10900223	C	T	C	T	-0.105448	0.005874	0.250122	0.233197	FALSE	FALSE	FALSE	ieu-a-7	10	46021631	0.0108986	184305	0.58991	Coronary heart disease || id:ieu-a-7	Coronary heart disease	Coronary heart disease || ||	TRUE	igd	10	45526183	0.0176162	2.15271e-09	GCST90199621	Carnitine levels	8192	2	TRUE			0.00435585	8192	1.57613e-06	184305	TRUE	9.392e-09	0.00417109	34.3043	29.788	35.8304
rs112819917	A	G	A	G	-0.438422	0.05399	0.00817656	0.011479	FALSE	FALSE	FALSE	ieu-a-7	6	58636718	0.0461505	184305	0.242054	Coronary heart disease || id:ieu-a-7	Coronary heart disease	Coronary heart disease || ||	TRUE	igd	6	58310440	0.0855532	2.98241e-07	GCST90199621	Carnitine levels	8192	2	TRUE			0.00319623	8192	7.42571e-06	184305	TRUE	1.84144e-06	0.00311759	25.613	29.788	26.2611
rs115168226	G	A	G	A	-0.446554	-0.057295	0.00618191	0.012256	FALSE	FALSE	FALSE	ieu-a-7	4	39616991	0.0570318	184305	0.315082	Coronary heart disease || id:ieu-a-7	Coronary heart disease	Coronary heart disease || ||	TRUE	igd	4	39615371	0.097039	4.18852e-06	GCST90199621	Carnitine levels	8192	2	TRUE			0.00257899	8192	5.47601e-06	184305	TRUE	1.75935e-05	0.00245023	20.1167	29.788	21.1766
rs1171617	T	G	T	G	0.443332	0.011763	0.770118	0.764249	FALSE	FALSE	FALSE	ieu-a-7	10	61467182	0.0124314	184305	0.344028	Coronary heart disease || id:ieu-a-7	Coronary heart disease	Coronary heart disease || ||	TRUE	igd	10	59707424	0.0179927	4.75726e-134	GCST90199621	Carnitine levels	8192	2	TRUE			0.0690122	8192	4.85805e-06	184305	TRUE	2.14511e-123	0.0695906	612.576	29.788	607.107
rs11871125	T	C	T	C	0.072665	-0.012078	0.394949	0.350769	FALSE	FALSE	FALSE	ieu-a-7	17	19432393	0.0109812	184305	0.271384	Coronary heart disease || id:ieu-a-7	Coronary heart disease	Coronary heart disease || ||	TRUE	igd	17	19529080	0.0157893	4.1814e-06	GCST90199621	Carnitine levels	8192	2	TRUE			0.0025794	8192	6.5638e-06	184305	TRUE	1.91878e-05	0.00252356	20.7202	29.788	21.1799
rs13026148	A	G	A	G	-0.0706059	0.001529	0.378223	0.350711	FALSE	FALSE	FALSE	ieu-a-7	2	215514568	0.0101893	184305	0.880718	Coronary heart disease || id:ieu-a-7	Coronary heart disease	Coronary heart disease || ||	TRUE	igd	2	214649844	0.0158653	8.57356e-06	GCST90199621	Carnitine levels	8192	2	TRUE			0.00241242	8192	1.22178e-07	184305	TRUE	1.54851e-05	0.00234474	19.2485	29.788	19.8055
rs13247874	T	C	T	C	-0.103668	-0.008875	0.190234	0.171285	FALSE	FALSE	FALSE	ieu-a-7	7	73010442	0.0127822	184305	0.487479	Coronary heart disease || id:ieu-a-7	Coronary heart disease	Coronary heart disease || ||	TRUE	igd	7	73596112	0.0195859	1.20324e-07	GCST90199621	Carnitine levels	8192	2	TRUE			0.00340907	8192	2.61572e-06	184305	TRUE	4.83604e-07	0.00331106	27.2077	29.788	28.0158
rs138190991	A	T	A	T	-0.212246	0.009338	0.0301671	0.027487	FALSE	TRUE	FALSE	ieu-a-7	10	61744076	0.0330413	184305	0.777471	Coronary heart disease || id:ieu-a-7	Coronary heart disease	Coronary heart disease || ||	TRUE	igd	10	59984318	0.0448917	2.26798e-06	GCST90199621	Carnitine levels	8192	2	TRUE			0.00272194	8192	4.33372e-07	184305	TRUE	4.98023e-06	0.00263596	21.6456	29.788	22.3536
rs149235996	G	A	G	A	-0.56909	0.103855	0.0120372	0.011372	FALSE	FALSE	FALSE	ieu-a-7	5	150719909	0.062524	184305	0.0967052	Coronary heart disease || id:ieu-a-7	Coronary heart disease	Coronary heart disease || ||	TRUE	igd	5	151340348	0.0700396	4.46387e-16	GCST90199621	Carnitine levels	8192	2	TRUE			0.00799657	8192	1.497e-05	184305	TRUE	3.03496e-14	0.00770297	63.577	29.788	66.0199
rs1511808	T	C	T	C	-0.0697692	0.000587	0.615503	0.589436	FALSE	FALSE	FALSE	ieu-a-7	4	189345908	0.0094235	184305	0.950331	Coronary heart disease || id:ieu-a-7	Coronary heart disease	Coronary heart disease || ||	TRUE	igd	4	188424754	0.0157378	9.28299e-06	GCST90199621	Carnitine levels	8192	2	TRUE			0.00239395	8192	2.10533e-08	184305	TRUE	1.53884e-05	0.00230399	18.9133	29.788	19.6535
rs1765260	A	G	A	G	-0.0999797	-0.003252	0.153343	0.169866	FALSE	FALSE	FALSE	ieu-a-7	15	79866347	0.0120577	184305	0.787388	Coronary heart disease || id:ieu-a-7	Coronary heart disease	Coronary heart disease || ||	TRUE	igd	15	79574005	0.0211507	2.27832e-06	GCST90199621	Carnitine levels	8192	2	TRUE			0.00272087	8192	3.94675e-07	184305	TRUE	4.93898e-06	0.00259552	21.3127	29.788	22.3447
rs2512510	A	G	A	G	-0.0870239	-0.003905	0.216759	0.197506	FALSE	FALSE	FALSE	ieu-a-7	11	80113567	0.0119262	184305	0.743343	Coronary heart disease || id:ieu-a-7	Coronary heart disease	Coronary heart disease || ||	TRUE	igd	11	80402523	0.0186419	3.03877e-06	GCST90199621	Carnitine levels	8192	2	TRUE			0.00265374	8192	5.81708e-07	184305	TRUE	6.86039e-06	0.00257146	21.1145	29.788	21.792
rs2625939	T	C	T	C	0.0859678	-0.011387	0.228206	0.190683	FALSE	FALSE	FALSE	ieu-a-7	12	95017410	0.0126823	184305	0.369257	Coronary heart disease || id:ieu-a-7	Coronary heart disease	Coronary heart disease || ||	TRUE	igd	12	94623634	0.0183528	2.81073e-06	GCST90199621	Carnitine levels	8192	2	TRUE			0.00267191	8192	4.3741e-06	184305	TRUE	1.10293e-05	0.00260334	21.377	29.788	21.9415
rs55775057	A	G	A	G	-0.0960378	-0.025967	0.150493	0.129001	FALSE	FALSE	FALSE	ieu-a-7	11	20167908	0.014995	184305	0.083324	Coronary heart disease || id:ieu-a-7	Coronary heart disease	Coronary heart disease || ||	TRUE	igd	11	20146362	0.0215564	8.38207e-06	GCST90199621	Carnitine levels	8192	2	TRUE			0.00241767	8192	1.62709e-05	184305	TRUE	6.3292e-05	0.00235829	19.3601	29.788	19.8487
rs72836546	T	C	T	C	-0.0906795	-0.011198	0.23482	0.21632	FALSE	FALSE	FALSE	ieu-a-7	6	14093319	0.0118209	184305	0.343482	Coronary heart disease || id:ieu-a-7	Coronary heart disease	Coronary heart disease || ||	TRUE	igd	6	14093088	0.0180707	5.22043e-07	GCST90199621	Carnitine levels	8192	2	TRUE			0.00306515	8192	4.86906e-06	184305	TRUE	2.45369e-06	0.00295493	24.2726	29.788	25.1807
rs73006619	C	A	C	A	-0.168203	-0.027601	0.0466597	0.041524	FALSE	FALSE	FALSE	ieu-a-7	19	20680913	0.0345665	184305	0.424585	Coronary heart disease || id:ieu-a-7	Coronary heart disease	Coronary heart disease || ||	TRUE	igd	19	20498107	0.0368665	5.05538e-06	GCST90199621	Carnitine levels	8192	2	TRUE			0.00253523	8192	3.45943e-06	184305	TRUE	1.72712e-05	0.00251702	20.6664	29.788	20.8163
rs73025372	G	A	G	A	0.157569	0.045185	0.0515375	0.059821	FALSE	FALSE	FALSE	ieu-a-7	3	15314364	0.0213345	184305	0.0341806	Coronary heart disease || id:ieu-a-7	Coronary heart disease	Coronary heart disease || ||	TRUE	igd	3	15272857	0.0346167	5.31831e-06	GCST90199621	Carnitine levels	8192	2	TRUE			0.00252342	8192	2.43378e-05	184305	TRUE	5.94555e-05	0.00242725	19.9276	29.788	20.7191
rs7537155	A	G	A	G	-0.0900652	0.005266	0.199113	0.24121	FALSE	FALSE	FALSE	ieu-a-7	1	19206621	0.0132917	184305	0.691966	Coronary heart disease || id:ieu-a-7	Coronary heart disease	Coronary heart disease || ||	TRUE	igd	1	18880127	0.019229	2.81588e-06	GCST90199621	Carnitine levels	8192	2	TRUE			0.0026715	8192	8.51663e-07	184305	TRUE	6.82518e-06	0.00258711	21.2434	29.788	21.9382
rs76187828	G	A	G	A	-0.117619	0.006705	0.0930578	0.082763	FALSE	FALSE	FALSE	ieu-a-7	10	34051881	0.0178302	184305	0.70688	Coronary heart disease || id:ieu-a-7	Coronary heart disease	Coronary heart disease || ||	TRUE	igd	10	33762953	0.0264472	8.69448e-06	GCST90199621	Carnitine levels	8192	2	TRUE			0.00240915	8192	7.67277e-07	184305	TRUE	1.93633e-05	0.00233516	19.1698	29.788	19.7786
rs76638161	T	C	T	C	0.192728	0.010837	0.0318954	0.02598	FALSE	FALSE	FALSE	ieu-a-7	11	109094318	0.0389898	184305	0.781056	Coronary heart disease || id:ieu-a-7	Coronary heart disease	Coronary heart disease || ||	TRUE	igd	11	109223591	0.0434891	9.35172e-06	GCST90199621	Carnitine levels	8192	2	TRUE			0.00239224	8192	4.19164e-07	184305	TRUE	1.89408e-05	0.00229388	18.83	29.788	19.6394
rs7705826	G	T	G	T	0.199276	0.018348	0.833702	0.795587	FALSE	FALSE	FALSE	ieu-a-7	5	131732456	0.0123618	184305	0.137744	Coronary heart disease || id:ieu-a-7	Coronary heart disease	Coronary heart disease || ||	TRUE	igd	5	132396764	0.0204928	2.37787e-22	GCST90199621	Carnitine levels	8192	2	TRUE			0.011414	8192	1.1953e-05	184305	TRUE	3.92216e-20	0.0110113	91.1865	29.788	94.56
rs78428648	A	G	A	G	0.179162	0.007815	0.0377174	0.055348	FALSE	FALSE	FALSE	ieu-a-7	8	116049077	0.0197029	184305	0.691632	Coronary heart disease || id:ieu-a-7	Coronary heart disease	Coronary heart disease || ||	TRUE	igd	8	115036848	0.0400467	7.68304e-06	GCST90199621	Carnitine levels	8192	2	TRUE			0.00243789	8192	8.53621e-07	184305	TRUE	1.75664e-05	0.00233006	19.1277	29.788	20.0151
rs78562549	T	G	T	G	0.394897	0.048633	0.00740514	0.010776	FALSE	FALSE	FALSE	ieu-a-7	2	36295898	0.0494984	184305	0.325846	Coronary heart disease || id:ieu-a-7	Coronary heart disease	Coronary heart disease || ||	TRUE	igd	2	36068755	0.0881915	7.54445e-06	GCST90199621	Carnitine levels	8192	2	TRUE			0.00244213	8192	5.23775e-06	184305	TRUE	2.95721e-05	0.00229247	18.8184	29.788	20.05
rs79717472	G	A	G	A	-0.218081	-0.026771	0.0280471	0.028103	FALSE	FALSE	FALSE	ieu-a-7	9	123616161	0.0298162	184305	0.369256	Coronary heart disease || id:ieu-a-7	Coronary heart disease	Coronary heart disease || ||	TRUE	igd	9	120853883	0.0461728	2.32235e-06	GCST90199621	Carnitine levels	8192	2	TRUE			0.00271643	8192	4.37412e-06	184305	TRUE	9.24916e-06	0.00259298	21.2917	29.788	22.3081
rs11070230	G	A	G	A	-0.230238	-0.010281	0.971915	0.932433	FALSE	FALSE	FALSE	ieu-a-7	15	40017333	0.0351389	184305	0.769843	Coronary heart disease || id:ieu-a-7	Coronary heart disease	Coronary heart disease || ||	TRUE	igd	15	39725132	0.0500968	4.30982e-06	GCST90199622	Benzoate levels	7306	2	TRUE			0.00288349	7306	4.64474e-07	184305	TRUE	8.67432e-06	0.00289392	21.1985	29.788	21.122
rs11166865	A	C	A	C	-0.0846751	0.010586	0.700507	0.647907	FALSE	FALSE	FALSE	ieu-a-7	8	139967699	0.0103381	184305	0.305845	Coronary heart disease || id:ieu-a-7	Coronary heart disease	Coronary heart disease || ||	TRUE	igd	8	138955456	0.018635	5.52263e-06	GCST90199622	Benzoate levels	7306	2	TRUE			0.00281881	7306	5.68915e-06	184305	TRUE	2.09867e-05	0.00300843	22.0399	29.788	20.6468
rs113989462	G	C	G	C	0.298062	0.1053	0.0159655	0.008734	FALSE	TRUE	FALSE	ieu-a-7	3	10160922	0.0708449	184305	0.137188	Coronary heart disease || id:ieu-a-7	Coronary heart disease	Coronary heart disease || ||	TRUE	igd	3	10119238	0.0656385	5.5997e-06	GCST90199622	Benzoate levels	7306	2	TRUE			0.00281521	7306	1.19868e-05	184305	TRUE	3.16847e-05	0.00279149	20.4461	29.788	20.6203
rs11625375	T	C	T	C	-0.204178	0.005286	0.965631	0.92436	FALSE	FALSE	FALSE	ieu-a-7	14	86275400	0.0294088	184305	0.857355	Coronary heart disease || id:ieu-a-7	Coronary heart disease	Coronary heart disease || ||	TRUE	igd	14	85809056	0.045214	6.30756e-06	GCST90199622	Benzoate levels	7306	2	TRUE			0.0027842	7306	1.75294e-07	184305	TRUE	1.12589e-05	0.00276711	20.267	29.788	20.3926
rs11749139	G	T	G	T	-0.191343	0.015979	0.0382593	0.043021	FALSE	FALSE	FALSE	ieu-a-7	5	75987967	0.0252864	184305	0.527439	Coronary heart disease || id:ieu-a-7	Coronary heart disease	Coronary heart disease || ||	TRUE	igd	5	76692142	0.0427947	7.77842e-06	GCST90199622	Benzoate levels	7306	2	TRUE			0.00272959	7306	2.16667e-06	184305	TRUE	2.04903e-05	0.00269433	19.7325	29.788	19.9915
rs141054369	T	C	T	C	-0.413333	-0.044506	0.00796594	0.008029	FALSE	FALSE	FALSE	ieu-a-7	2	199028695	0.074598	184305	0.550767	Coronary heart disease || id:ieu-a-7	Coronary heart disease	Coronary heart disease || ||	TRUE	igd	2	198163971	0.0922709	7.47975e-06	GCST90199622	Benzoate levels	7306	2	TRUE			0.0027398	7306	1.9313e-06	184305	TRUE	1.91502e-05	0.00270019	19.7756	29.788	20.0665
rs2749463	C	G	C	G	-0.10725	-0.016397	0.844828	0.806635	FALSE	TRUE	FALSE	ieu-a-7	14	49487736	0.0116699	184305	0.160001	Coronary heart disease || id:ieu-a-7	Coronary heart disease	Coronary heart disease || ||	TRUE	igd	14	49018533	0.022653	2.19626e-06	GCST90199622	Benzoate levels	7306	2	TRUE			0.00305951	7306	1.07117e-05	184305	TRUE	1.26329e-05	0.00301583	22.0942	29.788	22.4152
rs62192967	T	A	T	A	-0.163284	0.008064	0.0543493	0.051447	FALSE	TRUE	FALSE	ieu-a-7	2	242527179	0.0245119	184305	0.742168	Coronary heart disease || id:ieu-a-7	Coronary heart disease	Coronary heart disease || ||	TRUE	igd	2	241587764	0.0362749	6.7542e-06	GCST90199622	Benzoate levels	7306	2	TRUE			0.00276637	7306	5.87238e-07	184305	TRUE	1.37316e-05	0.00274058	20.0722	29.788	20.2617
rs62209511	T	C	T	C	-0.194544	0.011654	0.0387693	0.02762	FALSE	FALSE	FALSE	ieu-a-7	21	24741470	0.032433	184305	0.719351	Coronary heart disease || id:ieu-a-7	Coronary heart disease	Coronary heart disease || ||	TRUE	igd	21	23369148	0.0425626	4.85941e-06	GCST90199622	Benzoate levels	7306	2	TRUE			0.00285219	7306	7.00556e-07	184305	TRUE	1.03262e-05	0.00282086	20.6618	29.788	20.892
rs6468762	A	G	A	G	0.319567	0.023819	0.0144798	0.030773	FALSE	FALSE	FALSE	ieu-a-7	8	102230186	0.0262488	184305	0.364179	Coronary heart disease || id:ieu-a-7	Coronary heart disease	Coronary heart disease || ||	TRUE	igd	8	101217958	0.068531	3.1148e-06	GCST90199622	Benzoate levels	7306	2	TRUE			0.00296823	7306	4.4678e-06	184305	TRUE	1.11471e-05	0.00291462	21.3506	29.788	21.7445
rs72638543	T	C	T	C	0.185887	0.029949	0.0417238	0.047627	FALSE	FALSE	FALSE	ieu-a-7	1	6995522	0.0254037	184305	0.238429	Coronary heart disease || id:ieu-a-7	Coronary heart disease	Coronary heart disease || ||	TRUE	igd	1	6935462	0.0404404	4.29519e-06	GCST90199622	Benzoate levels	7306	2	TRUE			0.00288438	7306	7.54111e-06	184305	TRUE	1.90728e-05	0.00276314	20.2379	29.788	21.1284
rs73801273	T	C	T	C	0.243319	-0.027974	0.0261245	0.023267	FALSE	FALSE	FALSE	ieu-a-7	5	166964701	0.0350531	184305	0.424844	Coronary heart disease || id:ieu-a-7	Coronary heart disease	Coronary heart disease || ||	TRUE	igd	5	167537696	0.0511669	1.98052e-06	GCST90199622	Benzoate levels	7306	2	TRUE			0.00308653	7306	3.45559e-06	184305	TRUE	6.62581e-06	0.00301254	22.0701	29.788	22.6138
rs9863931	T	C	T	C	-0.108363	0.007856	0.132697	0.161111	FALSE	FALSE	FALSE	ieu-a-7	3	65014778	0.0125411	184305	0.531038	Coronary heart disease || id:ieu-a-7	Coronary heart disease	Coronary heart disease || ||	TRUE	igd	3	65029103	0.0240017	6.33735e-06	GCST90199622	Benzoate levels	7306	2	TRUE			0.00278296	7306	2.12911e-06	184305	TRUE	1.68293e-05	0.00270286	19.7952	29.788	20.3835
rs9943251	A	G	A	G	0.0830144	-0.009485	0.315014	0.341766	FALSE	FALSE	FALSE	ieu-a-7	1	151917115	0.0096559	184305	0.325953	Coronary heart disease || id:ieu-a-7	Coronary heart disease	Coronary heart disease || ||	TRUE	igd	1	151944639	0.0176575	2.58422e-06	GCST90199622	Benzoate levels	7306	2	TRUE			0.003017	7306	5.23546e-06	184305	TRUE	1.00317e-05	0.00297405	21.7873	29.788	22.1029
rs112191400	T	C	T	C	-0.162748	-0.023413	0.0864496	0.093177	FALSE	FALSE	FALSE	ieu-a-7	17	73097801	0.0185786	184305	0.207593	Coronary heart disease || id:ieu-a-7	Coronary heart disease	Coronary heart disease || ||	TRUE	igd	17	75101706	0.0365529	8.49127e-06	GCST90199623	Maltotriose levels	4641	2	TRUE			0.00425512	4641	8.61692e-06	184305	TRUE	2.71233e-05	0.00418366	19.4896	29.788	19.8238
rs113410972	A	G	A	G	0.141264	0.02907	0.135389	0.127953	FALSE	FALSE	FALSE	ieu-a-7	3	134044730	0.0159194	184305	0.0678391	Coronary heart disease || id:ieu-a-7	Coronary heart disease	Coronary heart disease || ||	TRUE	igd	3	134325888	0.0309121	4.88054e-06	GCST90199623	Maltotriose levels	4641	2	TRUE			0.00448158	4641	1.80924e-05	184305	TRUE	2.40584e-05	0.00467194	21.7749	29.788	20.8836
rs117257402	T	C	T	C	0.523098	0.117173	0.00954654	0.011235	FALSE	FALSE	FALSE	ieu-a-7	7	83411832	0.0608327	184305	0.0540854	Coronary heart disease || id:ieu-a-7	Coronary heart disease	Coronary heart disease || ||	TRUE	igd	7	83782516	0.106839	9.77447e-07	GCST90199623	Maltotriose levels	4641	2	TRUE			0.00514095	4641	2.01298e-05	184305	TRUE	5.92047e-06	0.00517459	24.1298	29.788	23.9721
rs1230433	A	G	A	G	-0.105534	0.001959	0.655467	0.669983	FALSE	FALSE	FALSE	ieu-a-7	13	46769432	0.0104337	184305	0.851067	Coronary heart disease || id:ieu-a-7	Coronary heart disease	Coronary heart disease || ||	TRUE	igd	13	46195297	0.021612	1.04432e-06	GCST90199623	Maltotriose levels	4641	2	TRUE			0.0051138	4641	1.91276e-07	184305	TRUE	1.67819e-06	0.00503033	23.4537	29.788	23.8449
rs12340914	G	A	G	A	0.0942204	-0.014194	0.413842	0.412277	FALSE	FALSE	FALSE	ieu-a-7	9	18511074	0.0094919	184305	0.134815	Coronary heart disease || id:ieu-a-7	Coronary heart disease	Coronary heart disease || ||	TRUE	igd	9	18511076	0.0211623	8.49668e-06	GCST90199623	Maltotriose levels	4641	2	TRUE			0.00425489	4641	1.21329e-05	184305	TRUE	3.19083e-05	0.00430694	20.0663	29.788	19.8228
rs1254839	G	A	G	A	-0.107757	-0.009883	0.322023	0.315223	FALSE	FALSE	FALSE	ieu-a-7	14	62420606	0.0099633	184305	0.321228	Coronary heart disease || id:ieu-a-7	Coronary heart disease	Coronary heart disease || ||	TRUE	igd	14	61953888	0.0223276	1.39183e-06	GCST90199623	Maltotriose levels	4641	2	TRUE			0.00499583	4641	5.33871e-06	184305	TRUE	4.09169e-06	0.00507017	23.6404	29.788	23.292
rs1360005	C	T	C	T	0.097467	-0.003952	0.510903	0.513358	FALSE	FALSE	FALSE	ieu-a-7	10	97071060	0.0094876	184305	0.677011	Coronary heart disease || id:ieu-a-7	Coronary heart disease	Coronary heart disease || ||	TRUE	igd	10	95311303	0.0207116	2.52725e-06	GCST90199623	Maltotriose levels	4641	2	TRUE			0.00475111	4641	9.41431e-07	184305	TRUE	4.68675e-06	0.00474765	22.1294	29.788	22.1456
rs141782806	C	T	C	T	-0.367335	0.018787	0.0169583	0.01289	FALSE	FALSE	FALSE	ieu-a-7	21	24163807	0.0528018	184305	0.721988	Coronary heart disease || id:ieu-a-7	Coronary heart disease	Coronary heart disease || ||	TRUE	igd	21	22791486	0.0795794	3.91306e-06	GCST90199623	Maltotriose levels	4641	2	TRUE			0.00457203	4641	6.86886e-07	184305	TRUE	6.82002e-06	0.00449893	20.9648	29.788	21.307
rs1426466	C	T	C	T	-0.114917	0.000274	0.801944	0.766519	FALSE	FALSE	FALSE	ieu-a-7	12	107772567	0.0108986	184305	0.979943	Coronary heart disease || id:ieu-a-7	Coronary heart disease	Coronary heart disease || ||	TRUE	igd	12	107378790	0.0260009	9.88191e-06	GCST90199623	Maltotriose levels	4641	2	TRUE			0.00419317	4641	3.42947e-09	184305	TRUE	1.31448e-05	0.00419499	19.5425	29.788	19.534
rs147666382	A	G	A	G	-0.2699	-0.017504	0.0362508	0.023105	FALSE	FALSE	FALSE	ieu-a-7	2	210567895	0.0389941	184305	0.653513	Coronary heart disease || id:ieu-a-7	Coronary heart disease	Coronary heart disease || ||	TRUE	igd	2	209703171	0.0550729	9.54593e-07	GCST90199623	Maltotriose levels	4641	2	TRUE			0.00515066	4641	1.09331e-06	184305	TRUE	1.88634e-06	0.00509	23.7333	29.788	24.0176
rs150000891	T	G	T	G	-0.322444	-0.120488	0.0219792	0.02124	FALSE	FALSE	FALSE	ieu-a-7	9	1931505	0.0498471	184305	0.0156426	Coronary heart disease || id:ieu-a-7	Coronary heart disease	Coronary heart disease || ||	TRUE	igd	9	1931505	0.0705527	4.87109e-06	GCST90199623	Maltotriose levels	4641	2	TRUE			0.00448235	4641	3.17002e-05	184305	TRUE	3.60811e-05	0.00446991	20.829	29.788	20.8873
rs150215008	T	C	T	C	-0.229438	-0.042671	0.044205	0.034012	FALSE	FALSE	FALSE	ieu-a-7	8	101007007	0.0302626	184305	0.158533	Coronary heart disease || id:ieu-a-7	Coronary heart disease	Coronary heart disease || ||	TRUE	igd	8	99994779	0.0505115	5.56468e-06	GCST90199623	Maltotriose levels	4641	2	TRUE			0.00442791	4641	1.07874e-05	184305	TRUE	2.03081e-05	0.00444833	20.728	29.788	20.6324
rs3741902	C	T	C	T	-0.113786	-0.003902	0.201663	0.191304	FALSE	FALSE	FALSE	ieu-a-7	12	6030302	0.0116177	184305	0.736972	Coronary heart disease || id:ieu-a-7	Coronary heart disease	Coronary heart disease || ||	TRUE	igd	12	5921136	0.025745	9.88314e-06	GCST90199623	Maltotriose levels	4641	2	TRUE			0.00419317	4641	6.12071e-07	184305	TRUE	1.63996e-05	0.00416889	19.4204	29.788	19.534
rs3935534	C	G	C	G	-0.105364	-0.000221	0.682113	0.650772	FALSE	TRUE	FALSE	ieu-a-7	15	61679072	0.0101665	184305	0.982657	Coronary heart disease || id:ieu-a-7	Coronary heart disease	Coronary heart disease || ||	TRUE	igd	15	61386873	0.0225011	2.83227e-06	GCST90199623	Maltotriose levels	4641	2	TRUE			0.00470441	4641	2.56395e-09	184305	TRUE	3.88867e-06	0.00481442	22.4421	29.788	21.9269
rs6006574	C	G	C	G	0.285259	0.027691	0.0282214	0.033988	FALSE	TRUE	FALSE	ieu-a-7	22	44301759	0.0290362	184305	0.34025	Coronary heart disease || id:ieu-a-7	Coronary heart disease	Coronary heart disease || ||	TRUE	igd	22	43905879	0.0623725	4.7969e-06	GCST90199623	Maltotriose levels	4641	2	TRUE			0.00448863	4641	4.93473e-06	184305	TRUE	1.27881e-05	0.00446328	20.798	29.788	20.9167
rs72552153	A	G	A	G	-0.451935	-0.06871	0.0123004	0.010956	FALSE	FALSE	FALSE	ieu-a-7	11	123498206	0.0591924	184305	0.245727	Coronary heart disease || id:ieu-a-7	Coronary heart disease	Coronary heart disease || ||	TRUE	igd	11	123627498	0.0933029	1.27418e-06	GCST90199623	Maltotriose levels	4641	2	TRUE			0.00503207	4641	7.31093e-06	184305	TRUE	4.27563e-06	0.00496279	23.1372	29.788	23.4618
rs72670481	T	C	T	C	-0.287487	-0.008636	0.0444222	0.042631	FALSE	FALSE	FALSE	ieu-a-7	1	68721141	0.0293708	184305	0.768732	Coronary heart disease || id:ieu-a-7	Coronary heart disease	Coronary heart disease || ||	TRUE	igd	1	68255458	0.0506395	1.36972e-08	GCST90199623	Maltotriose levels	4641	2	TRUE			0.00689964	4641	4.69095e-07	184305	TRUE	2.79408e-08	0.00701669	32.7805	29.788	32.2298
rs75049736	G	A	G	A	-0.274871	-0.025819	0.0334302	0.046241	FALSE	FALSE	FALSE	ieu-a-7	5	65619384	0.0249605	184305	0.300952	Coronary heart disease || id:ieu-a-7	Coronary heart disease	Coronary heart disease || ||	TRUE	igd	5	66323556	0.0590191	3.20362e-06	GCST90199623	Maltotriose levels	4641	2	TRUE			0.00465396	4641	5.80547e-06	184305	TRUE	9.26433e-06	0.0048827	22.762	29.788	21.6907
rs75183407	T	C	T	C	-0.330457	0.071766	0.0230852	0.018417	FALSE	FALSE	FALSE	ieu-a-7	12	130264458	0.0410005	184305	0.0800553	Coronary heart disease || id:ieu-a-7	Coronary heart disease	Coronary heart disease || ||	TRUE	igd	12	129779913	0.0688133	1.56907e-06	GCST90199623	Maltotriose levels	4641	2	TRUE			0.0049466	4641	1.66234e-05	184305	TRUE	8.0351e-06	0.0049255	22.9625	29.788	23.0614
rs7525374	G	A	G	A	0.0950368	-0.008135	0.525656	0.533291	FALSE	FALSE	FALSE	ieu-a-7	1	4754057	0.0100763	184305	0.419471	Coronary heart disease || id:ieu-a-7	Coronary heart disease	Coronary heart disease || ||	TRUE	igd	1	4693997	0.0212325	7.60482e-06	GCST90199623	Maltotriose levels	4641	2	TRUE			0.00430017	4641	3.53654e-06	184305	TRUE	1.78203e-05	0.00450411	20.9891	29.788	20.0346
rs78910814	C	T	C	T	-0.253193	0.009469	0.036	0.036875	FALSE	FALSE	FALSE	ieu-a-7	15	82411209	0.0267072	184305	0.722928	Coronary heart disease || id:ieu-a-7	Coronary heart disease	Coronary heart disease || ||	TRUE	igd	15	82118868	0.055947	6.0231e-06	GCST90199623	Maltotriose levels	4641	2	TRUE			0.00439554	4641	6.82054e-07	184305	TRUE	1.03188e-05	0.00444952	20.7336	29.788	20.4809
rs79441497	G	A	G	A	0.282649	-0.002621	0.0274713	0.035242	FALSE	FALSE	FALSE	ieu-a-7	2	140730955	0.0266236	184305	0.921578	Coronary heart disease || id:ieu-a-7	Coronary heart disease	Coronary heart disease || ||	TRUE	igd	2	139973386	0.0627987	6.76728e-06	GCST90199623	Maltotriose levels	4641	2	TRUE			0.00434787	4641	5.25857e-08	184305	TRUE	9.59273e-06	0.00426881	19.8879	29.788	20.2579
rs9855944	A	G	A	G	0.0992769	-0.00605	0.360843	0.345985	FALSE	FALSE	FALSE	ieu-a-7	3	141418907	0.010022	184305	0.546062	Coronary heart disease || id:ieu-a-7	Coronary heart disease	Coronary heart disease || ||	TRUE	igd	3	141700065	0.0216311	4.44236e-06	GCST90199623	Maltotriose levels	4641	2	TRUE			0.00452009	4641	1.97728e-06	184305	TRUE	9.23413e-06	0.00454624	21.1863	29.788	21.0639
rs10106654	C	A	C	A	0.0933587	0.003305	0.15585	0.171026	FALSE	FALSE	FALSE	ieu-a-7	8	96903985	0.0123455	184305	0.788924	Coronary heart disease || id:ieu-a-7	Coronary heart disease	Coronary heart disease || ||	TRUE	igd	8	95891757	0.0209933	8.70498e-06	GCST90199624	Hippurate levels	8260	2	TRUE			0.0023891	8260	3.8886e-07	184305	TRUE	1.76079e-05	0.00229333	18.9818	29.788	19.7764
rs1038161	A	T	A	T	-0.0698072	0.015807	0.396795	0.34884	FALSE	TRUE	FALSE	ieu-a-7	12	76045411	0.0099644	184305	0.112662	Coronary heart disease || id:ieu-a-7	Coronary heart disease	Coronary heart disease || ||	TRUE	igd	12	75651631	0.0156983	8.71615e-06	GCST90199624	Hippurate levels	8260	2	TRUE			0.00238881	8260	1.36539e-05	184305	TRUE	5.82166e-05	0.00233271	19.3086	29.788	19.774
rs10818729	C	T	C	T	-0.0744274	-0.000888	0.678724	0.653845	FALSE	FALSE	FALSE	ieu-a-7	9	125371916	0.0097472	184305	0.92741	Coronary heart disease || id:ieu-a-7	Coronary heart disease	Coronary heart disease || ||	TRUE	igd	9	122609637	0.0165535	6.91823e-06	GCST90199624	Hippurate levels	8260	2	TRUE			0.00244202	8260	4.50333e-08	184305	TRUE	1.19887e-05	0.00241583	19.9983	29.788	20.2156
rs114849156	A	G	A	G	0.19722	-0.039484	0.0321241	0.034437	FALSE	FALSE	FALSE	ieu-a-7	4	107710215	0.0292046	184305	0.176382	Coronary heart disease || id:ieu-a-7	Coronary heart disease	Coronary heart disease || ||	TRUE	igd	4	106789058	0.043393	5.49424e-06	GCST90199624	Hippurate levels	8260	2	TRUE			0.00249518	8260	9.91752e-06	184305	TRUE	3.12202e-05	0.0024187	20.0221	29.788	20.6568
rs117019913	A	G	A	G	0.204165	0.058174	0.0285926	0.026262	FALSE	FALSE	FALSE	ieu-a-7	14	51330211	0.039849	184305	0.144328	Coronary heart disease || id:ieu-a-7	Coronary heart disease	Coronary heart disease || ||	TRUE	igd	14	50863493	0.0459125	8.71489e-06	GCST90199624	Hippurate levels	8260	2	TRUE			0.00238884	8260	1.15634e-05	184305	TRUE	5.2068e-05	0.00231552	19.1659	29.788	19.7743
rs1271526	T	C	T	C	0.0916728	0.002261	0.824509	0.804107	FALSE	FALSE	FALSE	ieu-a-7	10	122598339	0.01259	184305	0.857476	Coronary heart disease || id:ieu-a-7	Coronary heart disease	Coronary heart disease || ||	TRUE	igd	10	120838827	0.0200283	4.71341e-06	GCST90199624	Hippurate levels	8260	2	TRUE			0.00253057	8260	1.74992e-07	184305	TRUE	9.05448e-06	0.00243199	20.1323	29.788	20.9504
rs12782560	T	C	T	C	0.224836	-0.031553	0.0246989	0.022557	FALSE	FALSE	FALSE	ieu-a-7	10	31310057	0.0373375	184305	0.39807	Coronary heart disease || id:ieu-a-7	Coronary heart disease	Coronary heart disease || ||	TRUE	igd	10	31021128	0.049354	5.2242e-06	GCST90199624	Hippurate levels	8260	2	TRUE			0.00250681	8260	3.87487e-06	184305	TRUE	1.87139e-05	0.00243544	20.161	29.788	20.7533
rs138633790	A	G	A	G	-0.220573	0.040917	0.0243022	0.017481	FALSE	FALSE	FALSE	ieu-a-7	13	112533374	0.0485534	184305	0.399383	Coronary heart disease || id:ieu-a-7	Coronary heart disease	Coronary heart disease || ||	TRUE	igd	13	111879060	0.0497508	9.26909e-06	GCST90199624	Hippurate levels	8260	2	TRUE			0.00237464	8260	3.85331e-06	184305	TRUE	3.16897e-05	0.00230726	19.0974	29.788	19.6564
rs1505993	T	C	T	C	-0.24093	0.012369	0.0219714	0.026204	FALSE	FALSE	FALSE	ieu-a-7	5	40519388	0.0279315	184305	0.657887	Coronary heart disease || id:ieu-a-7	Coronary heart disease	Coronary heart disease || ||	TRUE	igd	5	40519286	0.0524855	4.42373e-06	GCST90199624	Hippurate levels	8260	2	TRUE			0.0025452	8260	1.06402e-06	184305	TRUE	1.0974e-05	0.00249472	20.6529	29.788	21.0719
rs16909710	T	C	T	C	-0.19262	-0.013436	0.0418998	0.043943	FALSE	FALSE	FALSE	ieu-a-7	12	14264871	0.0257882	184305	0.602358	Coronary heart disease || id:ieu-a-7	Coronary heart disease	Coronary heart disease || ||	TRUE	igd	12	14111937	0.0384132	5.31941e-07	GCST90199624	Hippurate levels	8260	2	TRUE			0.00303561	8260	1.47287e-06	184305	TRUE	1.62624e-06	0.0029789	24.6732	29.788	25.1444
rs2886306	T	C	T	C	0.0716047	-0.008522	0.645165	0.603962	FALSE	FALSE	FALSE	ieu-a-7	9	136021780	0.0112908	184305	0.450384	Coronary heart disease || id:ieu-a-7	Coronary heart disease	Coronary heart disease || ||	TRUE	igd	9	133146393	0.016209	9.98048e-06	GCST90199624	Hippurate levels	8260	2	TRUE			0.0023576	8260	3.09101e-06	184305	TRUE	3.13295e-05	0.00234753	19.4315	29.788	19.5151
rs3779084	G	A	G	A	0.0853795	-0.00596	0.212634	0.206929	FALSE	FALSE	FALSE	ieu-a-7	7	50568735	0.0112538	184305	0.596391	Coronary heart disease || id:ieu-a-7	Coronary heart disease	Coronary heart disease || ||	TRUE	igd	7	50501037	0.0186386	4.63251e-06	GCST90199624	Hippurate levels	8260	2	TRUE			0.00253457	8260	1.52181e-06	184305	TRUE	1.24436e-05	0.00244088	20.2061	29.788	20.9836
rs56266656	G	A	G	A	0.222284	0.036579	0.0243576	0.018949	FALSE	FALSE	FALSE	ieu-a-7	13	31860488	0.0434283	184305	0.399629	Coronary heart disease || id:ieu-a-7	Coronary heart disease	Coronary heart disease || ||	TRUE	igd	13	31286351	0.0498262	8.15059e-06	GCST90199624	Hippurate levels	8260	2	TRUE			0.00240426	8260	3.84932e-06	184305	TRUE	2.8135e-05	0.0023484	19.4387	29.788	19.9022
rs62326335	G	C	G	C	-0.0890288	-0.005229	0.236388	0.236089	FALSE	TRUE	FALSE	ieu-a-7	4	172887866	0.011218	184305	0.641125	Coronary heart disease || id:ieu-a-7	Coronary heart disease	Coronary heart disease || ||	TRUE	igd	4	171966715	0.0182274	1.03783e-06	GCST90199624	Hippurate levels	8260	2	TRUE			0.00288061	8260	1.17889e-06	184305	TRUE	2.87771e-06	0.00286147	23.6978	29.788	23.8568
rs6443435	C	T	C	T	0.0729509	-0.002433	0.555966	0.560663	FALSE	FALSE	FALSE	ieu-a-7	3	176920514	0.0095473	184305	0.798849	Coronary heart disease || id:ieu-a-7	Coronary heart disease	Coronary heart disease || ||	TRUE	igd	3	177202726	0.0155727	2.80605e-06	GCST90199624	Hippurate levels	8260	2	TRUE			0.00265037	8260	3.52363e-07	184305	TRUE	5.95658e-06	0.00262758	21.7557	29.788	21.9449
rs7073480	C	T	C	T	0.121973	-0.010373	0.886196	0.856422	FALSE	FALSE	FALSE	ieu-a-7	10	13214160	0.0143019	184305	0.468276	Coronary heart disease || id:ieu-a-7	Coronary heart disease	Coronary heart disease || ||	TRUE	igd	10	13172160	0.0241952	4.62648e-07	GCST90199624	Hippurate levels	8260	2	TRUE			0.00306803	8260	2.85422e-06	184305	TRUE	1.76236e-06	0.00300085	24.8556	29.788	25.4138
rs72770519	A	G	A	G	-0.0980699	0.012019	0.162015	0.15039	FALSE	FALSE	FALSE	ieu-a-7	16	22798358	0.0143606	184305	0.402624	Coronary heart disease || id:ieu-a-7	Coronary heart disease	Coronary heart disease || ||	TRUE	igd	16	22787037	0.0209321	2.79769e-06	GCST90199624	Hippurate levels	8260	2	TRUE			0.00265105	8260	3.80065e-06	184305	TRUE	1.0434e-05	0.00261152	21.6224	29.788	21.9506
rs72782456	G	A	G	A	-0.132885	0.004938	0.0718974	0.076951	FALSE	FALSE	FALSE	ieu-a-7	16	65592609	0.0176705	184305	0.7799	Coronary heart disease || id:ieu-a-7	Coronary heart disease	Coronary heart disease || ||	TRUE	igd	16	65558706	0.0298174	8.32618e-06	GCST90199624	Hippurate levels	8260	2	TRUE			0.00239935	8260	4.23713e-07	184305	TRUE	1.70681e-05	0.00235663	19.507	29.788	19.8615
rs76464474	T	G	T	G	0.398426	0.065189	0.00903651	0.044471	FALSE	FALSE	FALSE	ieu-a-7	5	124306426	0.0341667	184305	0.0563949	Coronary heart disease || id:ieu-a-7	Coronary heart disease	Coronary heart disease || ||	TRUE	igd	5	124970733	0.0814489	9.99571e-07	GCST90199624	Hippurate levels	8260	2	TRUE			0.00288931	8260	1.97516e-05	184305	TRUE	1.14392e-05	0.00284304	23.5448	29.788	23.929
rs1020048	C	A	C	A	-0.102991	0.012542	0.809931	0.78755	FALSE	FALSE	FALSE	ieu-a-7	9	86666993	0.0120544	184305	0.298132	Coronary heart disease || id:ieu-a-7	Coronary heart disease	Coronary heart disease || ||	TRUE	igd	9	84052078	0.0198761	2.19934e-07	GCST90199625	Methionine sulfoxide levels	8243	2	TRUE			0.00324746	8243	5.87364e-06	184305	TRUE	1.22676e-06	0.00326579	27.0015	29.788	26.8495
rs1116046	T	A	T	A	-0.132929	-0.007936	0.0777355	0.062847	FALSE	TRUE	FALSE	ieu-a-7	5	101578769	0.0217668	184305	0.715417	Coronary heart disease || id:ieu-a-7	Coronary heart disease	Coronary heart disease || ||	TRUE	igd	5	102243065	0.0291497	5.11035e-06	GCST90199625	Methionine sulfoxide levels	8243	2	TRUE			0.00251708	8243	7.21243e-07	184305	TRUE	1.16518e-05	0.00253364	20.9327	29.788	20.7956
rs112196227	T	A	T	A	0.131339	-0.02367	0.0757631	0.067178	FALSE	TRUE	FALSE	ieu-a-7	6	97126139	0.0193097	184305	0.22027	Coronary heart disease || id:ieu-a-7	Coronary heart disease	Coronary heart disease || ||	TRUE	igd	6	96678263	0.0291534	6.63451e-06	GCST90199625	Methionine sulfoxide levels	8243	2	TRUE			0.00245675	8243	8.15285e-06	184305	TRUE	3.29599e-05	0.00241579	19.9567	29.788	20.2959
rs112256623	A	G	A	G	-0.222873	0.006416	0.0237401	0.030375	FALSE	FALSE	FALSE	ieu-a-7	17	44985177	0.0267485	184305	0.810436	Coronary heart disease || id:ieu-a-7	Coronary heart disease	Coronary heart disease || ||	TRUE	igd	17	46907811	0.0498876	7.91375e-06	GCST90199625	Methionine sulfoxide levels	8243	2	TRUE			0.00241601	8243	3.12174e-07	184305	TRUE	1.56586e-05	0.00230246	19.0184	29.788	19.9586
rs113966925	T	C	T	C	0.214979	0.010443	0.0264921	0.022262	FALSE	FALSE	FALSE	ieu-a-7	7	129795602	0.0358667	184305	0.770928	Coronary heart disease || id:ieu-a-7	Coronary heart disease	Coronary heart disease || ||	TRUE	igd	7	130155762	0.0483488	8.73154e-06	GCST90199625	Methionine sulfoxide levels	8243	2	TRUE			0.00239332	8243	4.59976e-07	184305	TRUE	1.80289e-05	0.00238384	19.6922	29.788	19.7706
rs114314137	G	A	G	A	-0.37398	0.001023	0.0085003	0.012596	FALSE	FALSE	FALSE	ieu-a-7	3	112859254	0.0577118	184305	0.985857	Coronary heart disease || id:ieu-a-7	Coronary heart disease	Coronary heart disease || ||	TRUE	igd	3	113140407	0.0844596	9.51482e-06	GCST90199625	Methionine sulfoxide levels	8243	2	TRUE			0.00237349	8243	1.70486e-09	184305	TRUE	1.51507e-05	0.00235751	19.4742	29.788	19.6064
rs114588795	G	C	G	C	0.384825	-0.057239	0.00783813	0.011732	FALSE	TRUE	FALSE	ieu-a-7	2	208441884	0.0600212	184305	0.340262	Coronary heart disease || id:ieu-a-7	Coronary heart disease	Coronary heart disease || ||	TRUE	igd	2	207577160	0.0865739	8.78741e-06	GCST90199625	Methionine sulfoxide levels	8243	2	TRUE			0.00239184	8243	4.93447e-06	184305	TRUE	3.33042e-05	0.00230331	19.0254	29.788	19.7584
rs12323117	C	T	C	T	-0.107817	0.033489	0.11287	0.126653	FALSE	FALSE	FALSE	ieu-a-7	13	21569227	0.0142726	184305	0.0189566	Coronary heart disease || id:ieu-a-7	Coronary heart disease	Coronary heart disease || ||	TRUE	igd	13	20995088	0.0242782	8.95865e-06	GCST90199625	Methionine sulfoxide levels	8243	2	TRUE			0.00238739	8243	2.98712e-05	184305	TRUE	0.00011458	0.00232793	19.2293	29.788	19.7216
rs142260529	T	C	T	C	0.289855	-0.015177	0.0147077	0.017425	FALSE	FALSE	FALSE	ieu-a-7	11	21722067	0.0602167	184305	0.80101	Coronary heart disease || id:ieu-a-7	Coronary heart disease	Coronary heart disease || ||	TRUE	igd	11	21700521	0.0644979	6.9889e-06	GCST90199625	Methionine sulfoxide levels	8243	2	TRUE			0.00244471	8243	3.44672e-07	184305	TRUE	1.40801e-05	0.00243501	20.1159	29.788	20.1962
rs146902454	C	T	C	T	-0.222442	-0.045362	0.0354437	0.040135	FALSE	FALSE	FALSE	ieu-a-7	20	50370942	0.0256557	184305	0.0770424	Coronary heart disease || id:ieu-a-7	Coronary heart disease	Coronary heart disease || ||	TRUE	igd	20	51754403	0.0421167	1.2809e-07	GCST90199625	Methionine sulfoxide levels	8243	2	TRUE			0.00337347	8243	1.6962e-05	184305	TRUE	1.60002e-06	0.00338322	27.9758	29.788	27.8949
rs162588	A	G	A	G	0.0843917	0.010068	0.212029	0.197589	FALSE	FALSE	FALSE	ieu-a-7	3	364098	0.0120577	184305	0.403725	Coronary heart disease || id:ieu-a-7	Coronary heart disease	Coronary heart disease || ||	TRUE	igd	3	322415	0.0189141	8.12626e-06	GCST90199625	Methionine sulfoxide levels	8243	2	TRUE			0.00240991	8243	3.78289e-06	184305	TRUE	2.78257e-05	0.00237977	19.6585	29.788	19.908
rs3138108	T	C	T	C	0.0870865	0.001694	0.230257	0.229045	FALSE	FALSE	FALSE	ieu-a-7	2	228666906	0.0119958	184305	0.887699	Coronary heart disease || id:ieu-a-7	Coronary heart disease	Coronary heart disease || ||	TRUE	igd	2	227802190	0.0182194	1.75401e-06	GCST90199625	Methionine sulfoxide levels	8243	2	TRUE			0.00276472	8243	1.08202e-07	184305	TRUE	3.40366e-06	0.00268838	22.2146	29.788	22.8472
rs390784	T	G	T	G	0.076227	-0.002306	0.464723	0.486942	FALSE	FALSE	FALSE	ieu-a-7	19	44488189	0.0093235	184305	0.804652	Coronary heart disease || id:ieu-a-7	Coronary heart disease	Coronary heart disease || ||	TRUE	igd	19	43984037	0.0154744	8.39336e-07	GCST90199625	Methionine sulfoxide levels	8243	2	TRUE			0.00293585	8243	3.31916e-07	184305	TRUE	1.88266e-06	0.00289082	23.8923	29.788	24.2655
rs4862595	T	C	T	C	0.0750216	0.00342	0.6944	0.657579	FALSE	FALSE	FALSE	ieu-a-7	4	186846963	0.0098189	184305	0.727609	Coronary heart disease || id:ieu-a-7	Coronary heart disease	Coronary heart disease || ||	TRUE	igd	4	185925809	0.0167234	7.25667e-06	GCST90199625	Methionine sulfoxide levels	8243	2	TRUE			0.00243604	8243	6.58255e-07	184305	TRUE	1.5969e-05	0.00238872	19.7326	29.788	20.1244
rs57419073	A	G	A	G	-0.125118	-0.013058	0.0856622	0.094989	FALSE	FALSE	FALSE	ieu-a-7	22	48915877	0.0158368	184305	0.409637	Coronary heart disease || id:ieu-a-7	Coronary heart disease	Coronary heart disease || ||	TRUE	igd	22	48520065	0.0275801	5.71868e-06	GCST90199625	Methionine sulfoxide levels	8243	2	TRUE			0.00249106	8243	3.68879e-06	184305	TRUE	1.99266e-05	0.00245225	20.2587	29.788	20.5801
rs66676945	T	C	T	C	0.0997286	0.024904	0.18189	0.151539	FALSE	FALSE	FALSE	ieu-a-7	5	158409505	0.0132146	184305	0.0594853	Coronary heart disease || id:ieu-a-7	Coronary heart disease	Coronary heart disease || ||	TRUE	igd	5	158982497	0.0200715	6.74151e-07	GCST90199625	Methionine sulfoxide levels	8243	2	TRUE			0.00298676	8243	1.92703e-05	184305	TRUE	7.87323e-06	0.00295999	24.4657	29.788	24.6877
rs6706818	G	A	G	A	0.076177	0.009662	0.297934	0.33595	FALSE	FALSE	FALSE	ieu-a-7	2	56574432	0.0100372	184305	0.335739	Coronary heart disease || id:ieu-a-7	Coronary heart disease	Coronary heart disease || ||	TRUE	igd	2	56347297	0.0168437	6.10924e-06	GCST90199625	Methionine sulfoxide levels	8243	2	TRUE			0.0024758	8243	5.02776e-06	184305	TRUE	2.40522e-05	0.00242759	20.0545	29.788	20.4537
rs72924553	G	A	G	A	0.29059	-0.017957	0.0147202	0.013975	FALSE	FALSE	FALSE	ieu-a-7	18	28703261	0.0438042	184305	0.681852	Coronary heart disease || id:ieu-a-7	Coronary heart disease	Coronary heart disease || ||	TRUE	igd	18	31123298	0.0641031	5.81041e-06	GCST90199625	Methionine sulfoxide levels	8243	2	TRUE			0.00248738	8243	9.11808e-07	184305	TRUE	1.37265e-05	0.00244943	20.2353	29.788	20.5496
rs74981086	A	G	A	G	-0.207867	0.018787	0.0321797	0.0269	FALSE	FALSE	FALSE	ieu-a-7	9	26798493	0.034599	184305	0.587135	Coronary heart disease || id:ieu-a-7	Coronary heart disease	Coronary heart disease || ||	TRUE	igd	9	26798495	0.044132	2.47574e-06	GCST90199625	Methionine sulfoxide levels	8243	2	TRUE			0.00268483	8243	1.59976e-06	184305	TRUE	7.00433e-06	0.0026914	22.2397	29.788	22.1852
rs76954145	T	C	T	C	-0.192677	0.034454	0.0434198	0.039522	FALSE	FALSE	FALSE	ieu-a-7	10	103476350	0.0269104	184305	0.200431	Coronary heart disease || id:ieu-a-7	Coronary heart disease	Coronary heart disease || ||	TRUE	igd	10	101716593	0.0380845	4.2103e-07	GCST90199625	Methionine sulfoxide levels	8243	2	TRUE			0.00309625	8243	8.89411e-06	184305	TRUE	2.84038e-06	0.00308389	25.493	29.788	25.5955
rs7708674	T	C	T	C	-0.13605	0.022798	0.0742635	0.087197	FALSE	FALSE	FALSE	ieu-a-7	5	60558879	0.0158434	184305	0.150161	Coronary heart disease || id:ieu-a-7	Coronary heart disease	Coronary heart disease || ||	TRUE	igd	5	61263052	0.0295137	4.032e-06	GCST90199625	Methionine sulfoxide levels	8243	2	TRUE			0.00257188	8243	1.12346e-05	184305	TRUE	2.55237e-05	0.00254501	21.027	29.788	21.2496
rs78631663	C	T	C	T	0.256598	0.003659	0.0180649	0.017873	FALSE	FALSE	FALSE	ieu-a-7	8	4938197	0.0426603	184305	0.931649	Coronary heart disease || id:ieu-a-7	Coronary heart disease	Coronary heart disease || ||	TRUE	igd	8	5080675	0.0575554	8.26193e-06	GCST90199625	Methionine sulfoxide levels	8243	2	TRUE			0.00240607	8243	3.99158e-08	184305	TRUE	1.41141e-05	0.0023359	19.2953	29.788	19.8762
rs78762284	A	G	A	G	0.1179	0.002339	0.14571	0.11438	FALSE	FALSE	FALSE	ieu-a-7	12	111144765	0.0170611	184305	0.890955	Coronary heart disease || id:ieu-a-7	Coronary heart disease	Coronary heart disease || ||	TRUE	igd	12	110706960	0.0220764	9.26651e-08	GCST90199625	Methionine sulfoxide levels	8243	2	TRUE			0.00344898	8243	1.0198e-07	184305	TRUE	2.06564e-07	0.00346061	28.6179	29.788	28.5214
rs7990044	G	A	G	A	0.0695317	-0.004592	0.510057	0.505859	FALSE	FALSE	FALSE	ieu-a-7	13	88706198	0.0092551	184305	0.619782	Coronary heart disease || id:ieu-a-7	Coronary heart disease	Coronary heart disease || ||	TRUE	igd	13	88053943	0.0154663	6.93449e-06	GCST90199625	Methionine sulfoxide levels	8243	2	TRUE			0.00244652	8243	1.3357e-06	184305	TRUE	1.75691e-05	0.00241635	19.9614	29.788	20.2112
rs10518870	G	A	G	A	0.0728152	-0.00766	0.559125	0.521622	FALSE	FALSE	FALSE	ieu-a-7	15	57017888	0.0094278	184305	0.416511	Coronary heart disease || id:ieu-a-7	Coronary heart disease	Coronary heart disease || ||	TRUE	igd	15	56725690	0.0159215	4.79876e-06	GCST90199626	Xanthurenate levels	7965	2	TRUE			0.00261975	7965	3.58181e-06	184305	TRUE	1.63172e-05	0.00261396	20.8695	29.788	20.9159
rs10901595	T	C	T	C	-0.0850013	0.002048	0.205555	0.185138	FALSE	FALSE	FALSE	ieu-a-7	10	128020936	0.0123097	184305	0.867863	Coronary heart disease || id:ieu-a-7	Coronary heart disease	Coronary heart disease || ||	TRUE	igd	10	126332367	0.0190317	7.95847e-06	GCST90199626	Xanthurenate levels	7965	2	TRUE			0.00249881	7965	1.50187e-07	184305	TRUE	1.44513e-05	0.00235979	18.8354	29.788	19.9478
rs115107012	A	G	A	G	0.355674	0.034985	0.00953162	0.011769	FALSE	FALSE	FALSE	ieu-a-7	5	107770777	0.0589773	184305	0.553051	Coronary heart disease || id:ieu-a-7	Coronary heart disease	Coronary heart disease || ||	TRUE	igd	5	108435076	0.0792725	7.23249e-06	GCST90199626	Xanthurenate levels	7965	2	TRUE			0.00252166	7965	1.90924e-06	184305	TRUE	1.9547e-05	0.00238859	19.0659	29.788	20.1307
rs117446717	G	A	G	A	0.337234	-0.051649	0.0107723	0.017671	FALSE	FALSE	FALSE	ieu-a-7	6	87426076	0.0433577	184305	0.233564	Coronary heart disease || id:ieu-a-7	Coronary heart disease	Coronary heart disease || ||	TRUE	igd	6	86716358	0.0755884	8.14081e-06	GCST90199626	Xanthurenate levels	7965	2	TRUE			0.0024934	7965	7.69938e-06	184305	TRUE	3.7301e-05	0.0024238	19.3476	29.788	19.9046
rs117776343	C	A	C	A	-0.254301	-0.006039	0.0229805	0.021798	FALSE	FALSE	FALSE	ieu-a-7	14	91510791	0.0390213	184305	0.877009	Coronary heart disease || id:ieu-a-7	Coronary heart disease	Coronary heart disease || ||	TRUE	igd	14	91044447	0.0519299	9.73115e-07	GCST90199626	Xanthurenate levels	7965	2	TRUE			0.00300247	7965	1.29955e-07	184305	TRUE	1.93269e-06	0.00290395	23.1915	29.788	23.9807
rs13038820	A	G	A	G	-0.108314	-0.00488	0.152841	0.132362	FALSE	FALSE	FALSE	ieu-a-7	20	37241830	0.0166309	184305	0.769194	Coronary heart disease || id:ieu-a-7	Coronary heart disease	Coronary heart disease || ||	TRUE	igd	20	38613187	0.0216513	5.65531e-07	GCST90199626	Xanthurenate levels	7965	2	TRUE			0.00313301	7965	4.67171e-07	184305	TRUE	1.32882e-06	0.00303811	24.2662	29.788	25.0266
rs1339135	G	A	G	A	-0.102275	-0.007877	0.142632	0.164955	FALSE	FALSE	FALSE	ieu-a-7	1	164860682	0.0123564	184305	0.52381	Coronary heart disease || id:ieu-a-7	Coronary heart disease	Coronary heart disease || ||	TRUE	igd	1	164891445	0.0221736	3.97938e-06	GCST90199626	Xanthurenate levels	7965	2	TRUE			0.00266459	7965	2.20498e-06	184305	TRUE	1.16555e-05	0.00255831	20.4241	29.788	21.2749
rs148768795	A	G	A	G	-0.343757	-0.033459	0.0102144	0.013082	FALSE	FALSE	FALSE	ieu-a-7	6	150715047	0.0687744	184305	0.626611	Coronary heart disease || id:ieu-a-7	Coronary heart disease	Coronary heart disease || ||	TRUE	igd	6	150393911	0.0773679	8.86512e-06	GCST90199626	Xanthurenate levels	7965	2	TRUE			0.00247303	7965	1.28422e-06	184305	TRUE	2.14627e-05	0.00238939	19.0723	29.788	19.7416
rs150456440	A	G	A	G	-0.207866	0.058944	0.0283656	0.025195	FALSE	FALSE	FALSE	ieu-a-7	16	1837444	0.0483904	184305	0.223189	Coronary heart disease || id:ieu-a-7	Coronary heart disease	Coronary heart disease || ||	TRUE	igd	16	1787443	0.0469472	9.52642e-06	GCST90199626	Xanthurenate levels	7965	2	TRUE			0.00245586	7965	8.05054e-06	184305	TRUE	4.40619e-05	0.00238173	19.011	29.788	19.6041
rs189750460	C	T	C	T	0.201137	0.061045	0.0313286	0.024546	FALSE	FALSE	FALSE	ieu-a-7	5	45640856	0.0377612	184305	0.105963	Coronary heart disease || id:ieu-a-7	Coronary heart disease	Coronary heart disease || ||	TRUE	igd	5	45640754	0.044222	5.40694e-06	GCST90199626	Xanthurenate levels	7965	2	TRUE			0.00259122	7965	1.41798e-05	184305	TRUE	3.7561e-05	0.00245545	19.6009	29.788	20.6875
rs2762353	G	A	G	A	0.108263	0.013465	0.556451	0.554028	FALSE	FALSE	FALSE	ieu-a-7	6	25794431	0.0093887	184305	0.151524	Coronary heart disease || id:ieu-a-7	Coronary heart disease	Coronary heart disease || ||	TRUE	igd	6	25794203	0.0156013	3.93898e-12	GCST90199626	Xanthurenate levels	7965	2	TRUE			0.00601095	7965	1.116e-05	184305	TRUE	8.30078e-11	0.00578574	46.3399	29.788	48.1547
rs354710	T	C	T	C	0.0973775	0.004846	0.587063	0.54576	FALSE	FALSE	FALSE	ieu-a-7	2	143887084	0.0098123	184305	0.6214	Coronary heart disease || id:ieu-a-7	Coronary heart disease	Coronary heart disease || ||	TRUE	igd	2	143129515	0.0160404	1.27297e-09	GCST90199626	Xanthurenate levels	7965	2	TRUE			0.00460686	7965	1.3234e-06	184305	TRUE	5.27407e-09	0.00459744	36.7785	29.788	36.8542
rs41294573	T	C	T	C	0.148756	0.004377	0.0615182	0.056461	FALSE	FALSE	FALSE	ieu-a-7	10	6025235	0.0209912	184305	0.834826	Coronary heart disease || id:ieu-a-7	Coronary heart disease	Coronary heart disease || ||	TRUE	igd	10	5983272	0.0320487	3.45762e-06	GCST90199626	Xanthurenate levels	7965	2	TRUE			0.00269822	7965	2.3591e-07	184305	TRUE	6.80582e-06	0.0025551	20.3984	29.788	21.5441
rs4148325	T	C	T	C	0.160369	0.002402	0.326316	0.327243	FALSE	FALSE	FALSE	ieu-a-7	2	234673309	0.0100578	184305	0.811246	Coronary heart disease || id:ieu-a-7	Coronary heart disease	Coronary heart disease || ||	TRUE	igd	2	233764663	0.0164451	1.81218e-22	GCST90199626	Xanthurenate levels	7965	2	TRUE			0.0118014	7965	3.09462e-07	184305	TRUE	2.55197e-21	0.0113075	91.0712	29.788	95.0972
rs4654393	A	G	A	G	-0.0716015	0.013425	0.43716	0.400247	FALSE	FALSE	FALSE	ieu-a-7	1	29534437	0.0095918	184305	0.161625	Coronary heart disease || id:ieu-a-7	Coronary heart disease	Coronary heart disease || ||	TRUE	igd	1	29207925	0.0157954	5.8138e-06	GCST90199626	Xanthurenate levels	7965	2	TRUE			0.00257387	7965	1.0629e-05	184305	TRUE	3.30738e-05	0.0025229	20.1406	29.788	20.5486
rs4952404	T	C	T	C	0.0900816	-0.016482	0.209216	0.249903	FALSE	FALSE	FALSE	ieu-a-7	2	40560630	0.0104739	184305	0.115574	Coronary heart disease || id:ieu-a-7	Coronary heart disease	Coronary heart disease || ||	TRUE	igd	2	40333490	0.0193387	3.1916e-06	GCST90199626	Xanthurenate levels	7965	2	TRUE			0.00271743	7965	1.34358e-05	184305	TRUE	2.25474e-05	0.00268507	21.4387	29.788	21.6979
rs55953511	A	G	A	G	0.260906	-0.008872	0.0251338	0.023495	FALSE	FALSE	FALSE	ieu-a-7	2	88577419	0.0429992	184305	0.836534	Coronary heart disease || id:ieu-a-7	Coronary heart disease	Coronary heart disease || ||	TRUE	igd	2	88277900	0.0506967	2.65512e-07	GCST90199626	Xanthurenate levels	7965	2	TRUE			0.00331505	7965	2.30988e-07	184305	TRUE	5.92551e-07	0.00333581	26.652	29.788	26.4855
rs610480	G	A	G	A	0.0847289	0.01237	0.764105	0.716873	FALSE	FALSE	FALSE	ieu-a-7	6	140217063	0.0117046	184305	0.290582	Coronary heart disease || id:ieu-a-7	Coronary heart disease	Coronary heart disease || ||	TRUE	igd	6	139895926	0.0185433	4.89465e-06	GCST90199626	Xanthurenate levels	7965	2	TRUE			0.00261502	7965	6.06026e-06	184305	TRUE	2.07805e-05	0.002588	20.6617	29.788	20.878
rs62344716	A	G	A	G	-0.150456	0.011381	0.065916	0.054354	FALSE	FALSE	FALSE	ieu-a-7	4	170992853	0.0219157	184305	0.603545	Coronary heart disease || id:ieu-a-7	Coronary heart disease	Coronary heart disease || ||	TRUE	igd	4	170071702	0.0311209	1.33435e-06	GCST90199626	Xanthurenate levels	7965	2	TRUE			0.00292661	7965	1.46325e-06	184305	TRUE	3.74392e-06	0.00278757	22.2595	29.788	23.373
rs74323113	T	G	T	G	0.240073	-0.053351	0.0231871	0.022616	FALSE	FALSE	FALSE	ieu-a-7	4	111394314	0.0378937	184305	0.159157	Coronary heart disease || id:ieu-a-7	Coronary heart disease	Coronary heart disease || ||	TRUE	igd	4	110473158	0.0515337	3.18436e-06	GCST90199626	Xanthurenate levels	7965	2	TRUE			0.00271797	7965	1.07551e-05	184305	TRUE	1.93536e-05	0.00261081	20.8443	29.788	21.7022
rs75152214	A	G	A	G	-0.1598	0.009575	0.0494948	0.046076	FALSE	FALSE	FALSE	ieu-a-7	11	64311113	0.029499	184305	0.745494	Coronary heart disease || id:ieu-a-7	Coronary heart disease	Coronary heart disease || ||	TRUE	igd	11	64543641	0.0360557	9.33471e-06	GCST90199626	Xanthurenate levels	7965	2	TRUE			0.0024607	7965	5.7165e-07	184305	TRUE	1.94437e-05	0.00240269	19.1787	29.788	19.6429
rs76961499	T	C	T	C	-0.174429	-0.00299	0.0443616	0.03631	FALSE	FALSE	FALSE	ieu-a-7	10	125699989	0.0322614	184305	0.926157	Coronary heart disease || id:ieu-a-7	Coronary heart disease	Coronary heart disease || ||	TRUE	igd	10	123940473	0.0379757	4.36543e-06	GCST90199626	Xanthurenate levels	7965	2	TRUE			0.00264241	7965	4.66062e-08	184305	TRUE	7.6077e-06	0.00257969	20.5952	29.788	21.0972
rs80253618	A	G	A	G	0.145764	-0.006351	0.114498	0.128702	FALSE	FALSE	FALSE	ieu-a-7	4	170861556	0.0137306	184305	0.64369	Coronary heart disease || id:ieu-a-7	Coronary heart disease	Coronary heart disease || ||	TRUE	igd	4	169940405	0.0245961	3.09841e-09	GCST90199626	Xanthurenate levels	7965	2	TRUE			0.00439117	7965	1.16084e-06	184305	TRUE	1.17337e-08	0.00430842	34.4564	29.788	35.1211
rs8058114	A	G	A	G	0.0980895	-0.008986	0.167555	0.17955	FALSE	FALSE	FALSE	ieu-a-7	16	12697629	0.012036	184305	0.455308	Coronary heart disease || id:ieu-a-7	Coronary heart disease	Coronary heart disease || ||	TRUE	igd	16	12603772	0.0207577	2.29605e-06	GCST90199626	Xanthurenate levels	7965	2	TRUE			0.00279636	7965	3.02437e-06	184305	TRUE	7.7422e-06	0.00268403	21.4305	29.788	22.3299
rs10168931	A	G	A	G	0.203073	0.026637	0.237802	0.208943	FALSE	FALSE	FALSE	ieu-a-7	2	73877219	0.0119979	184305	0.0264101	Coronary heart disease || id:ieu-a-7	Coronary heart disease	Coronary heart disease || ||	TRUE	igd	2	73650092	0.02127	1.32992e-21	GCST90199627	N-alpha-acetylornithine levels	5606	2	TRUE			0.0160053	5606	2.67434e-05	184305	TRUE	2.29875e-19	0.0149492	85.0466	29.788	91.1527
rs117299913	C	T	C	T	0.27471	-0.011088	0.0263158	0.022038	FALSE	FALSE	FALSE	ieu-a-7	6	124931853	0.0462613	184305	0.810577	Coronary heart disease || id:ieu-a-7	Coronary heart disease	Coronary heart disease || ||	TRUE	igd	6	124610707	0.0585098	2.66467e-06	GCST90199627	N-alpha-acetylornithine levels	5606	2	TRUE			0.00391822	5606	3.11701e-07	184305	TRUE	4.63377e-06	0.00386735	21.7568	29.788	22.0441
rs117413891	T	C	T	C	0.333876	-0.017765	0.016178	0.016145	FALSE	FALSE	FALSE	ieu-a-7	16	13576687	0.0402075	184305	0.65861	Coronary heart disease || id:ieu-a-7	Coronary heart disease	Coronary heart disease || ||	TRUE	igd	16	13482830	0.0723372	3.92063e-06	GCST90199627	N-alpha-acetylornithine levels	5606	2	TRUE			0.00378705	5606	1.05921e-06	184305	TRUE	7.90364e-06	0.00354848	19.9565	29.788	21.3033
rs117790062	T	C	T	C	0.207108	0.016675	0.0408473	0.034598	FALSE	FALSE	FALSE	ieu-a-7	8	114366307	0.0270418	184305	0.537473	Coronary heart disease || id:ieu-a-7	Coronary heart disease	Coronary heart disease || ||	TRUE	igd	8	113354078	0.0466507	9.01451e-06	GCST90199627	N-alpha-acetylornithine levels	5606	2	TRUE			0.00350473	5606	2.06313e-06	184305	TRUE	2.00174e-05	0.00336105	18.8988	29.788	19.7096
rs13184558	C	T	C	T	0.215007	-0.01924	0.038115	0.032713	FALSE	FALSE	FALSE	ieu-a-7	5	26807885	0.0304701	184305	0.527753	Coronary heart disease || id:ieu-a-7	Coronary heart disease	Coronary heart disease || ||	TRUE	igd	5	26807776	0.0481609	8.03104e-06	GCST90199627	N-alpha-acetylornithine levels	5606	2	TRUE			0.00354386	5606	2.16336e-06	184305	TRUE	1.81477e-05	0.00338965	19.0602	29.788	19.9304
rs13296886	G	C	G	C	-0.158395	0.007007	0.0835143	0.077264	FALSE	TRUE	FALSE	ieu-a-7	9	84338045	0.0181072	184305	0.698776	Coronary heart disease || id:ieu-a-7	Coronary heart disease	Coronary heart disease || ||	TRUE	igd	9	81723130	0.0335323	2.31636e-06	GCST90199627	N-alpha-acetylornithine levels	5606	2	TRUE			0.00396581	5606	8.1251e-07	184305	TRUE	4.57296e-06	0.0038406	21.6057	29.788	22.3129
rs149122905	G	A	G	A	0.414825	-0.002392	0.010359	0.01169	FALSE	FALSE	FALSE	ieu-a-7	5	101365626	0.0493746	184305	0.961361	Coronary heart disease || id:ieu-a-7	Coronary heart disease	Coronary heart disease || ||	TRUE	igd	5	102029922	0.0905551	4.62956e-06	GCST90199627	N-alpha-acetylornithine levels	5606	2	TRUE			0.00373063	5606	1.27345e-08	184305	TRUE	6.75413e-06	0.00352822	19.8421	29.788	20.9848
rs17360657	C	T	C	T	0.238255	0.013538	0.0336427	0.023704	FALSE	FALSE	FALSE	ieu-a-7	6	36516027	0.0353225	184305	0.70152	Coronary heart disease || id:ieu-a-7	Coronary heart disease	Coronary heart disease || ||	TRUE	igd	6	36548250	0.0504986	2.38105e-06	GCST90199627	N-alpha-acetylornithine levels	5606	2	TRUE			0.00395645	5606	7.97028e-07	184305	TRUE	4.68076e-06	0.00369099	20.7609	29.788	22.26
rs4960616	C	T	C	T	-0.187249	-0.006155	0.06269	0.085106	FALSE	FALSE	FALSE	ieu-a-7	7	154591150	0.0164115	184305	0.70763	Coronary heart disease || id:ieu-a-7	Coronary heart disease	Coronary heart disease || ||	TRUE	igd	7	154799440	0.037458	5.76543e-07	GCST90199627	N-alpha-acetylornithine levels	5606	2	TRUE			0.00443935	5606	7.6318e-07	184305	TRUE	1.19722e-06	0.00412051	23.1869	29.788	24.9891
rs6507370	C	T	C	T	0.0923915	0.00573	0.373838	0.407623	FALSE	FALSE	FALSE	ieu-a-7	18	38168639	0.0097515	184305	0.5568	Coronary heart disease || id:ieu-a-7	Coronary heart disease	Coronary heart disease || ||	TRUE	igd	18	40588675	0.0189886	1.14088e-06	GCST90199627	N-alpha-acetylornithine levels	5606	2	TRUE			0.00420677	5606	1.87341e-06	184305	TRUE	2.75097e-06	0.00399636	22.4854	29.788	23.6744
rs6846979	G	A	G	A	0.101172	0.001052	0.216337	0.212962	FALSE	FALSE	FALSE	ieu-a-7	4	47757815	0.0116818	184305	0.928244	Coronary heart disease || id:ieu-a-7	Coronary heart disease	Coronary heart disease || ||	TRUE	igd	4	47755798	0.0223797	6.1633e-06	GCST90199627	N-alpha-acetylornithine levels	5606	2	TRUE			0.00363357	5606	4.40027e-08	184305	TRUE	9.2095e-06	0.00347065	19.5173	29.788	20.4368
rs758072	T	G	T	G	0.171213	-0.002572	0.0731357	0.108795	FALSE	FALSE	FALSE	ieu-a-7	2	242083872	0.0148874	184305	0.862838	Coronary heart disease || id:ieu-a-7	Coronary heart disease	Coronary heart disease || ||	TRUE	igd	2	241144457	0.0359573	1.92102e-06	GCST90199627	N-alpha-acetylornithine levels	5606	2	TRUE			0.00402947	5606	1.61947e-07	184305	TRUE	3.20003e-06	0.00397419	22.3602	29.788	22.6725
rs76075534	T	C	T	C	-0.205346	0.050747	0.0424259	0.044125	FALSE	FALSE	FALSE	ieu-a-7	14	26681540	0.029663	184305	0.0871204	Coronary heart disease || id:ieu-a-7	Coronary heart disease	Coronary heart disease || ||	TRUE	igd	14	26212334	0.0457631	7.21786e-06	GCST90199627	N-alpha-acetylornithine levels	5606	2	TRUE			0.00358002	5606	1.588e-05	184305	TRUE	3.73048e-05	0.00342615	19.2661	29.788	20.1345
rs77300395	T	C	T	C	0.268952	0.000213	0.0258012	0.023406	FALSE	FALSE	FALSE	ieu-a-7	10	19824623	0.0435011	184305	0.996093	Coronary heart disease || id:ieu-a-7	Coronary heart disease	Coronary heart disease || ||	TRUE	igd	10	19535694	0.0583612	4.05768e-06	GCST90199627	N-alpha-acetylornithine levels	5606	2	TRUE			0.00377538	5606	1.30085e-10	184305	TRUE	5.73847e-06	0.00363636	20.4525	29.788	21.2374
rs77556524	G	C	G	C	-0.335972	-0.010219	0.016622	0.017473	FALSE	TRUE	FALSE	ieu-a-7	5	174210355	0.0394916	184305	0.795818	Coronary heart disease || id:ieu-a-7	Coronary heart disease	Coronary heart disease || ||	TRUE	igd	5	174783352	0.0714166	2.54621e-06	GCST90199627	N-alpha-acetylornithine levels	5606	2	TRUE			0.00393367	5606	3.63308e-07	184305	TRUE	4.50584e-06	0.00369012	20.756	29.788	22.1313
rs80205778	A	G	A	G	0.467453	-0.069866	0.00948461	0.013477	FALSE	FALSE	FALSE	ieu-a-7	11	60940544	0.0413427	184305	0.0910416	Coronary heart disease || id:ieu-a-7	Coronary heart disease	Coronary heart disease || ||	TRUE	igd	11	61173072	0.0945412	7.63638e-07	GCST90199627	N-alpha-acetylornithine levels	5606	2	TRUE			0.00434355	5606	1.54951e-05	184305	TRUE	4.7235e-06	0.00410569	23.1032	29.788	24.4475
rs8084246	A	G	A	G	0.101796	-0.010386	0.281514	0.305957	FALSE	FALSE	FALSE	ieu-a-7	18	11772230	0.0100785	184305	0.30277	Coronary heart disease || id:ieu-a-7	Coronary heart disease	Coronary heart disease || ||	TRUE	igd	18	11772231	0.02024	4.91927e-07	GCST90199627	N-alpha-acetylornithine levels	5606	2	TRUE			0.00449352	5606	5.76196e-06	184305	TRUE	1.81028e-06	0.00419189	23.5902	29.788	25.2953
rs9981625	C	G	C	G	-0.0899526	0.015492	0.372672	0.362626	FALSE	TRUE	FALSE	ieu-a-7	21	44775278	0.0112365	184305	0.167979	Coronary heart disease || id:ieu-a-7	Coronary heart disease	Coronary heart disease || ||	TRUE	igd	21	43355398	0.0201886	8.36509e-06	GCST90199627	N-alpha-acetylornithine levels	5606	2	TRUE			0.00353005	5606	1.03137e-05	184305	TRUE	3.33066e-05	0.00378337	21.2825	29.788	19.8525
rs10014780	G	A	G	A	-0.0956574	-0.013473	0.159583	0.161839	FALSE	FALSE	FALSE	ieu-a-7	4	67340650	0.0131255	184305	0.304667	Coronary heart disease || id:ieu-a-7	Coronary heart disease	Coronary heart disease || ||	TRUE	igd	4	66474932	0.0209224	4.83094e-06	GCST90199628	3-methylhistidine levels	8289	2	TRUE			0.00251607	8289	5.71692e-06	184305	TRUE	2.06715e-05	0.00245442	20.3898	29.788	20.9033
rs10181994	T	A	T	A	0.0821837	0.004259	0.691427	0.677553	FALSE	TRUE	FALSE	ieu-a-7	2	127483083	0.0103142	184305	0.67966	Coronary heart disease || id:ieu-a-7	Coronary heart disease	Coronary heart disease || ||	TRUE	igd	2	126725507	0.0169317	1.21096e-06	GCST90199628	3-methylhistidine levels	8289	2	TRUE			0.00283491	8289	9.25148e-07	184305	TRUE	3.16075e-06	0.00288208	23.9528	29.788	23.5597
rs10966648	T	C	T	C	-0.0937684	-0.00344	0.745054	0.719306	FALSE	FALSE	FALSE	ieu-a-7	9	2512056	0.0107618	184305	0.749233	Coronary heart disease || id:ieu-a-7	Coronary heart disease	Coronary heart disease || ||	TRUE	igd	9	2512056	0.0178574	1.51321e-07	GCST90199628	3-methylhistidine levels	8289	2	TRUE			0.00331617	8289	5.54389e-07	184305	TRUE	4.03505e-07	0.00334025	27.7734	29.788	27.5725
rs114734560	T	C	T	C	-0.35764	-0.025938	0.0102702	0.015599	FALSE	FALSE	FALSE	ieu-a-7	1	34209995	0.0545225	184305	0.634267	Coronary heart disease || id:ieu-a-7	Coronary heart disease	Coronary heart disease || ||	TRUE	igd	1	33744394	0.076823	3.23383e-06	GCST90199628	3-methylhistidine levels	8289	2	TRUE			0.00260842	8289	1.22797e-06	184305	TRUE	8.46025e-06	0.00260027	21.6046	29.788	21.6725
rs117090299	C	T	C	T	-0.295449	-0.004124	0.0137094	0.010721	FALSE	FALSE	FALSE	ieu-a-7	7	85843948	0.0626565	184305	0.947522	Coronary heart disease || id:ieu-a-7	Coronary heart disease	Coronary heart disease || ||	TRUE	igd	7	86214632	0.0654447	6.34695e-06	GCST90199628	3-methylhistidine levels	8289	2	TRUE			0.00245331	8289	2.35057e-08	184305	TRUE	1.07966e-05	0.00236058	19.6084	29.788	20.3806
rs117771460	A	G	A	G	0.264482	-0.016199	0.0170496	0.015704	FALSE	FALSE	FALSE	ieu-a-7	19	40150159	0.0484154	184305	0.73794	Coronary heart disease || id:ieu-a-7	Coronary heart disease	Coronary heart disease || ||	TRUE	igd	19	39659519	0.0597176	9.47246e-06	GCST90199628	3-methylhistidine levels	8289	2	TRUE			0.00236137	8289	6.07403e-07	184305	TRUE	2.03344e-05	0.0023446	19.4753	29.788	19.615
rs11872731	A	G	A	G	0.135492	0.014403	0.0719668	0.123635	FALSE	FALSE	FALSE	ieu-a-7	18	4592009	0.0159509	184305	0.366548	Coronary heart disease || id:ieu-a-7	Coronary heart disease	Coronary heart disease || ||	TRUE	igd	18	4592009	0.0304621	8.67197e-06	GCST90199628	3-methylhistidine levels	8289	2	TRUE			0.00238163	8289	4.42386e-06	184305	TRUE	3.15658e-05	0.00245218	20.3712	29.788	19.7837
rs12138831	T	G	T	G	-0.223214	0.011749	0.0257563	0.034798	FALSE	FALSE	FALSE	ieu-a-7	1	79110645	0.0257426	184305	0.6481	Coronary heart disease || id:ieu-a-7	Coronary heart disease	Coronary heart disease || ||	TRUE	igd	1	78644960	0.0486608	4.4935e-06	GCST90199628	3-methylhistidine levels	8289	2	TRUE			0.00253271	8289	1.13022e-06	184305	TRUE	1.13069e-05	0.00250048	20.7734	29.788	21.0419
rs12553086	G	T	G	T	0.14967	-0.019177	0.0669778	0.062861	FALSE	FALSE	FALSE	ieu-a-7	9	134626272	0.0196812	184305	0.329866	Coronary heart disease || id:ieu-a-7	Coronary heart disease	Coronary heart disease || ||	TRUE	igd	9	131750885	0.0307172	1.1018e-06	GCST90199628	3-methylhistidine levels	8289	2	TRUE			0.00285671	8289	5.15138e-06	184305	TRUE	5.06991e-06	0.00279977	23.2668	29.788	23.7414
rs13234372	A	G	A	G	-0.0821865	0.019607	0.309524	0.314448	FALSE	FALSE	FALSE	ieu-a-7	7	109887100	0.0100307	184305	0.0506186	Coronary heart disease || id:ieu-a-7	Coronary heart disease	Coronary heart disease || ||	TRUE	igd	7	110247043	0.0166991	8.58358e-07	GCST90199628	3-methylhistidine levels	8289	2	TRUE			0.00291441	8289	2.07309e-05	184305	TRUE	1.05058e-05	0.00288718	23.9953	29.788	24.2223
rs138750865	T	C	T	C	0.229043	-0.004693	0.0259304	0.018024	FALSE	FALSE	FALSE	ieu-a-7	19	40688520	0.0507683	184305	0.926349	Coronary heart disease || id:ieu-a-7	Coronary heart disease	Coronary heart disease || ||	TRUE	igd	19	40182613	0.0483745	2.19298e-06	GCST90199628	3-methylhistidine levels	8289	2	TRUE			0.00269793	8289	4.63643e-08	184305	TRUE	4.02141e-06	0.00265011	22.0198	29.788	22.4182
rs17670800	A	G	A	G	0.0880673	-0.001222	0.205669	0.194386	FALSE	FALSE	FALSE	ieu-a-7	8	70813658	0.0119708	184305	0.918692	Coronary heart disease || id:ieu-a-7	Coronary heart disease	Coronary heart disease || ||	TRUE	igd	8	69901423	0.0190393	3.73616e-06	GCST90199628	3-methylhistidine levels	8289	2	TRUE			0.0025752	8289	5.6541e-08	184305	TRUE	6.7456e-06	0.00253413	21.0537	29.788	21.3957
rs1857803	C	T	C	T	-0.0823134	0.00213	0.265217	0.275806	FALSE	FALSE	FALSE	ieu-a-7	5	101969987	0.0104272	184305	0.838139	Coronary heart disease || id:ieu-a-7	Coronary heart disease	Coronary heart disease || ||	TRUE	igd	5	102634283	0.017447	2.38263e-06	GCST90199628	3-methylhistidine levels	8289	2	TRUE			0.00267878	8289	2.26408e-07	184305	TRUE	4.86353e-06	0.00264078	21.9421	29.788	22.2587
rs2518573	G	T	G	T	0.0801615	-0.006456	0.738791	0.712995	FALSE	FALSE	FALSE	ieu-a-7	6	52998856	0.0103664	184305	0.533426	Coronary heart disease || id:ieu-a-7	Coronary heart disease	Coronary heart disease || ||	TRUE	igd	6	53134058	0.017558	4.98237e-06	GCST90199628	3-methylhistidine levels	8289	2	TRUE			0.00250896	8289	2.10445e-06	184305	TRUE	1.45818e-05	0.00248011	20.6038	29.788	20.844
rs2797978	C	T	C	T	0.120013	-0.015803	0.0929542	0.085601	FALSE	FALSE	FALSE	ieu-a-7	1	101930893	0.0165733	184305	0.340327	Coronary heart disease || id:ieu-a-7	Coronary heart disease	Coronary heart disease || ||	TRUE	igd	1	101465337	0.0263768	5.36565e-06	GCST90199628	3-methylhistidine levels	8289	2	TRUE			0.0024919	8289	4.93318e-06	184305	TRUE	2.12734e-05	0.00242876	20.1761	29.788	20.702
rs4142196	A	C	A	C	-0.0772398	-0.005518	0.739059	0.708324	FALSE	FALSE	FALSE	ieu-a-7	13	77266434	0.0102903	184305	0.591797	Coronary heart disease || id:ieu-a-7	Coronary heart disease	Coronary heart disease || ||	TRUE	igd	13	76692299	0.0173893	8.92094e-06	GCST90199628	3-methylhistidine levels	8289	2	TRUE			0.00237513	8289	1.56018e-06	184305	TRUE	2.31637e-05	0.00230109	19.1131	29.788	19.7296
rs72879030	C	G	C	G	-0.116576	0.001809	0.106939	0.110235	FALSE	TRUE	FALSE	ieu-a-7	2	47434200	0.0151807	184305	0.905145	Coronary heart disease || id:ieu-a-7	Coronary heart disease	Coronary heart disease || ||	TRUE	igd	2	47207061	0.0252142	3.77474e-06	GCST90199628	3-methylhistidine levels	8289	2	TRUE			0.00257283	8289	7.7048e-08	184305	TRUE	6.92632e-06	0.00259577	21.5671	29.788	21.3761
rs72997812	A	G	A	G	0.0913382	-0.002848	0.174747	0.165044	FALSE	FALSE	FALSE	ieu-a-7	11	112661438	0.0126171	184305	0.821415	Coronary heart disease || id:ieu-a-7	Coronary heart disease	Coronary heart disease || ||	TRUE	igd	11	112790715	0.0202172	6.24738e-06	GCST90199628	3-methylhistidine levels	8289	2	TRUE			0.00245695	8289	2.76457e-07	184305	TRUE	1.23855e-05	0.0024062	19.9883	29.788	20.4109
rs73035811	A	G	A	G	0.121144	0.017033	0.0916234	0.077463	FALSE	FALSE	FALSE	ieu-a-7	3	15098421	0.0183896	184305	0.354327	Coronary heart disease || id:ieu-a-7	Coronary heart disease	Coronary heart disease || ||	TRUE	igd	3	15056914	0.0268809	6.58475e-06	GCST90199628	3-methylhistidine levels	8289	2	TRUE			0.00244487	8289	4.65482e-06	184305	TRUE	2.50339e-05	0.0024429	20.2939	29.788	20.3103
rs7516441	A	G	A	G	0.109101	0.00119	0.117381	0.107676	FALSE	FALSE	FALSE	ieu-a-7	1	60140247	0.016921	184305	0.943934	Coronary heart disease || id:ieu-a-7	Coronary heart disease	Coronary heart disease || ||	TRUE	igd	1	59674575	0.0246539	9.63078e-06	GCST90199628	3-methylhistidine levels	8289	2	TRUE			0.00235757	8289	2.68355e-08	184305	TRUE	1.61413e-05	0.00246637	20.4894	29.788	19.5833
rs75256283	A	T	A	T	0.156459	0.016352	0.0592049	0.049515	FALSE	TRUE	FALSE	ieu-a-7	4	114254914	0.0270049	184305	0.544834	Coronary heart disease || id:ieu-a-7	Coronary heart disease	Coronary heart disease || ||	TRUE	igd	4	113333758	0.0328215	1.87007e-06	GCST90199628	3-methylhistidine levels	8289	2	TRUE			0.00273462	8289	1.98941e-06	184305	TRUE	5.75264e-06	0.00272699	22.6604	29.788	22.724
rs752834	A	G	A	G	0.0925549	0.015415	0.194184	0.177549	FALSE	FALSE	FALSE	ieu-a-7	2	111798658	0.012679	184305	0.224067	Coronary heart disease || id:ieu-a-7	Coronary heart disease	Coronary heart disease || ||	TRUE	igd	2	111041081	0.0194528	1.95589e-06	GCST90199628	3-methylhistidine levels	8289	2	TRUE			0.00272428	8289	8.02013e-06	184305	TRUE	1.08319e-05	0.00268088	22.2762	29.788	22.6378
rs75782963	A	G	A	G	0.209933	-0.066767	0.0271103	0.02159	FALSE	FALSE	FALSE	ieu-a-7	9	80063225	0.0353942	184305	0.0592434	Coronary heart disease || id:ieu-a-7	Coronary heart disease	Coronary heart disease || ||	TRUE	igd	9	77448309	0.0472735	8.96138e-06	GCST90199628	3-methylhistidine levels	8289	2	TRUE			0.00237409	8289	1.93072e-05	184305	TRUE	7.78335e-05	0.00232482	19.3107	29.788	19.7209
rs7746774	G	A	G	A	-0.10469	-0.012627	0.144171	0.144823	FALSE	FALSE	FALSE	ieu-a-7	6	139351479	0.0150754	184305	0.40226	Coronary heart disease || id:ieu-a-7	Coronary heart disease	Coronary heart disease || ||	TRUE	igd	6	139030342	0.021704	1.41037e-06	GCST90199628	3-methylhistidine levels	8289	2	TRUE			0.00279973	8289	3.80652e-06	184305	TRUE	5.56163e-06	0.00270461	22.4739	29.788	23.2665
rs9910668	C	A	C	A	0.0739981	0.005843	0.675224	0.670073	FALSE	FALSE	FALSE	ieu-a-7	17	78057063	0.0102784	184305	0.569712	Coronary heart disease || id:ieu-a-7	Coronary heart disease	Coronary heart disease || ||	TRUE	igd	17	80083264	0.0163504	6.01742e-06	GCST90199628	3-methylhistidine levels	8289	2	TRUE			0.00246556	8289	1.75343e-06	184305	TRUE	1.65234e-05	0.00240161	19.9501	29.788	20.4826
rs10816075	T	C	T	C	0.0973711	-0.00089	0.164771	0.210869	FALSE	FALSE	FALSE	ieu-a-7	9	9247320	0.0112756	184305	0.937087	Coronary heart disease || id:ieu-a-7	Coronary heart disease	Coronary heart disease || ||	TRUE	igd	9	9247320	0.0205632	2.18817e-06	GCST90199629	Glycerophosphorylcholine (GPC) levels	8212	2	TRUE			0.00272365	8212	3.3804e-08	184305	TRUE	3.94109e-06	0.00260962	21.481	29.788	22.4222
rs112211203	T	G	T	G	0.234246	0.009124	0.0220984	0.018448	FALSE	FALSE	FALSE	ieu-a-7	5	55824398	0.0381631	184305	0.811044	Coronary heart disease || id:ieu-a-7	Coronary heart disease	Coronary heart disease || ||	TRUE	igd	5	56528571	0.0515822	5.59308e-06	GCST90199629	Glycerophosphorylcholine (GPC) levels	8212	2	TRUE			0.0025056	8212	3.10135e-07	184305	TRUE	1.12394e-05	0.00237154	19.5166	29.788	20.6227
rs112779076	C	T	C	T	0.15285	0.021594	0.0536218	0.046801	FALSE	FALSE	FALSE	ieu-a-7	2	167215209	0.0247737	184305	0.383398	Coronary heart disease || id:ieu-a-7	Coronary heart disease	Coronary heart disease || ||	TRUE	igd	2	166358699	0.0344046	8.88357e-06	GCST90199629	Glycerophosphorylcholine (GPC) levels	8212	2	TRUE			0.00239835	8212	4.1224e-06	184305	TRUE	3.11398e-05	0.00237119	19.5138	29.788	19.7378
rs116900994	T	C	T	C	0.163415	-0.00728	0.0468293	0.038757	FALSE	FALSE	FALSE	ieu-a-7	12	78752661	0.0307721	184305	0.812984	Coronary heart disease || id:ieu-a-7	Coronary heart disease	Coronary heart disease || ||	TRUE	igd	12	78358881	0.036324	6.83363e-06	GCST90199629	Glycerophosphorylcholine (GPC) levels	8212	2	TRUE			0.00245914	8212	3.0368e-07	184305	TRUE	1.35564e-05	0.00238398	19.6192	29.788	20.2393
rs117568432	T	G	T	G	0.114159	0.020451	0.0959356	0.079603	FALSE	FALSE	FALSE	ieu-a-7	15	66183436	0.0180757	184305	0.257883	Coronary heart disease || id:ieu-a-7	Coronary heart disease	Coronary heart disease || ||	TRUE	igd	15	65891098	0.0257192	9.05148e-06	GCST90199629	Glycerophosphorylcholine (GPC) levels	8212	2	TRUE			0.00239398	8212	6.9455e-06	184305	TRUE	4.00193e-05	0.00226063	18.6018	29.788	19.7018
rs11773889	T	C	T	C	-0.0874834	0.007613	0.221719	0.20594	FALSE	FALSE	FALSE	ieu-a-7	7	36338589	0.0117177	184305	0.515885	Coronary heart disease || id:ieu-a-7	Coronary heart disease	Coronary heart disease || ||	TRUE	igd	7	36298980	0.0185441	2.38644e-06	GCST90199629	Glycerophosphorylcholine (GPC) levels	8212	2	TRUE			0.00270347	8212	2.29031e-06	184305	TRUE	7.48594e-06	0.00264132	21.7426	29.788	22.2556
rs117793976	C	G	C	G	-0.352368	-0.077806	0.0095729	0.009471	FALSE	TRUE	FALSE	ieu-a-7	6	75817822	0.0706765	184305	0.270951	Coronary heart disease || id:ieu-a-7	Coronary heart disease	Coronary heart disease || ||	TRUE	igd	6	75108106	0.0785058	7.17504e-06	GCST90199629	Glycerophosphorylcholine (GPC) levels	8212	2	TRUE			0.00244783	8212	6.57568e-06	184305	TRUE	3.15054e-05	0.00235445	19.3756	29.788	20.146
rs11783515	G	A	G	A	-0.0742076	-0.002284	0.676129	0.659182	FALSE	FALSE	FALSE	ieu-a-7	8	59320389	0.0100665	184305	0.820509	Coronary heart disease || id:ieu-a-7	Coronary heart disease	Coronary heart disease || ||	TRUE	igd	8	58407830	0.0165155	7.01584e-06	GCST90199629	Glycerophosphorylcholine (GPC) levels	8212	2	TRUE			0.00245303	8212	2.7932e-07	184305	TRUE	1.37732e-05	0.00241173	19.8482	29.788	20.1889
rs12800817	A	G	A	G	0.192118	-0.025607	0.0394753	0.03007	FALSE	FALSE	FALSE	ieu-a-7	11	94020022	0.032886	184305	0.43618	Coronary heart disease || id:ieu-a-7	Coronary heart disease	Coronary heart disease || ||	TRUE	igd	11	94286856	0.0392089	9.59083e-07	GCST90199629	Glycerophosphorylcholine (GPC) levels	8212	2	TRUE			0.00291578	8212	3.28974e-06	184305	TRUE	3.64198e-06	0.00279898	23.0441	29.788	24.0086
rs141866706	C	T	C	T	-0.348062	0.103527	0.0108575	0.016474	FALSE	FALSE	FALSE	ieu-a-7	14	74258364	0.0487891	184305	0.0338439	Coronary heart disease || id:ieu-a-7	Coronary heart disease	Coronary heart disease || ||	TRUE	igd	14	73791661	0.0740522	2.59877e-06	GCST90199629	Glycerophosphorylcholine (GPC) levels	8212	2	TRUE			0.00268366	8212	2.44297e-05	184305	TRUE	3.20474e-05	0.00260215	21.4194	29.788	22.0921
rs143156137	T	C	T	C	0.270431	-0.032419	0.0166342	0.01386	FALSE	FALSE	FALSE	ieu-a-7	3	182440463	0.0452055	184305	0.473283	Coronary heart disease || id:ieu-a-7	Coronary heart disease	Coronary heart disease || ||	TRUE	igd	3	182722675	0.059272	5.05379e-06	GCST90199629	Glycerophosphorylcholine (GPC) levels	8212	2	TRUE			0.00252913	8212	2.79051e-06	184305	TRUE	1.60356e-05	0.00239254	19.6899	29.788	20.8168
rs149395329	C	T	C	T	0.186141	-0.036209	0.035363	0.018069	FALSE	FALSE	FALSE	ieu-a-7	12	44912263	0.0491704	184305	0.461489	Coronary heart disease || id:ieu-a-7	Coronary heart disease	Coronary heart disease || ||	TRUE	igd	12	44518480	0.0419148	8.95637e-06	GCST90199629	Glycerophosphorylcholine (GPC) levels	8212	2	TRUE			0.00239643	8212	2.94233e-06	184305	TRUE	2.77539e-05	0.00236389	19.4535	29.788	19.7219
rs16973477	G	A	G	A	0.0952092	0.025831	0.151329	0.197331	FALSE	FALSE	FALSE	ieu-a-7	16	71887381	0.0116634	184305	0.02678	Coronary heart disease || id:ieu-a-7	Coronary heart disease	Coronary heart disease || ||	TRUE	igd	16	71853478	0.0213323	8.07672e-06	GCST90199629	Glycerophosphorylcholine (GPC) levels	8212	2	TRUE			0.0024204	8212	2.66127e-05	184305	TRUE	9.32205e-05	0.00232836	19.1604	29.788	19.9197
rs2015026	C	T	C	T	-0.0725261	-0.006375	0.372436	0.351052	FALSE	FALSE	FALSE	ieu-a-7	10	97759583	0.0100057	184305	0.524036	Coronary heart disease || id:ieu-a-7	Coronary heart disease	Coronary heart disease || ||	TRUE	igd	10	95999826	0.0160143	5.93109e-06	GCST90199629	Glycerophosphorylcholine (GPC) levels	8212	2	TRUE			0.00249199	8212	2.20258e-06	184305	TRUE	1.72702e-05	0.00245883	20.2367	29.788	20.5103
rs3738976	T	C	T	C	-0.0972846	-0.002682	0.151338	0.176002	FALSE	FALSE	FALSE	ieu-a-7	2	45158238	0.01215	184305	0.825295	Coronary heart disease || id:ieu-a-7	Coronary heart disease	Coronary heart disease || ||	TRUE	igd	2	44931099	0.0213799	5.35738e-06	GCST90199629	Glycerophosphorylcholine (GPC) levels	8212	2	TRUE			0.00251559	8212	2.64382e-07	184305	TRUE	1.06034e-05	0.00243109	20.0079	29.788	20.7051
rs4715365	T	C	T	C	0.16235	0.02343	0.0518449	0.088198	FALSE	FALSE	FALSE	ieu-a-7	6	52791760	0.0159737	184305	0.142435	Coronary heart disease || id:ieu-a-7	Coronary heart disease	Coronary heart disease || ||	TRUE	igd	6	52926962	0.0350163	3.5449e-06	GCST90199629	Glycerophosphorylcholine (GPC) levels	8212	2	TRUE			0.00261147	8212	1.16734e-05	184305	TRUE	2.32302e-05	0.00259131	21.33	29.788	21.4963
rs4980965	C	T	C	T	0.0708155	-0.000101	0.448602	0.426271	FALSE	FALSE	FALSE	ieu-a-7	12	833418	0.0097743	184305	0.991755	Coronary heart disease || id:ieu-a-7	Coronary heart disease	Coronary heart disease || ||	TRUE	igd	12	724252	0.0158191	7.58431e-06	GCST90199629	Glycerophosphorylcholine (GPC) levels	8212	2	TRUE			0.00243496	8212	5.79347e-10	184305	TRUE	1.20923e-05	0.00248092	20.419	29.788	20.0398
rs557700	C	T	C	T	0.0756793	-0.016362	0.705143	0.677488	FALSE	FALSE	FALSE	ieu-a-7	15	48083026	0.0100741	184305	0.104342	Coronary heart disease || id:ieu-a-7	Coronary heart disease	Coronary heart disease || ||	TRUE	igd	15	47790829	0.016833	6.92818e-06	GCST90199629	Glycerophosphorylcholine (GPC) levels	8212	2	TRUE			0.00245595	8212	1.43127e-05	184305	TRUE	4.87519e-05	0.00238162	19.5998	29.788	20.213
rs665474	T	A	T	A	0.0744593	0.004557	0.281624	0.266574	FALSE	TRUE	FALSE	ieu-a-7	11	29437330	0.0106705	184305	0.669333	Coronary heart disease || id:ieu-a-7	Coronary heart disease	Coronary heart disease || ||	TRUE	igd	11	29415783	0.0168561	9.99158e-06	GCST90199629	Glycerophosphorylcholine (GPC) levels	8212	2	TRUE			0.0023711	8212	9.89591e-07	184305	TRUE	2.31642e-05	0.00224331	18.459	29.788	19.513
rs6981994	C	T	C	T	0.271135	0.030801	0.0174872	0.008704	FALSE	FALSE	FALSE	ieu-a-7	8	135673205	0.0657861	184305	0.639642	Coronary heart disease || id:ieu-a-7	Coronary heart disease	Coronary heart disease || ||	TRUE	igd	8	134660962	0.0585165	3.59568e-06	GCST90199629	Glycerophosphorylcholine (GPC) levels	8212	2	TRUE			0.00260818	8212	1.1894e-06	184305	TRUE	9.22084e-06	0.00252615	20.7922	29.788	21.4691
rs71468473	T	C	T	C	0.102458	-0.000863	0.166274	0.164689	FALSE	FALSE	FALSE	ieu-a-7	12	131698243	0.0127301	184305	0.945951	Coronary heart disease || id:ieu-a-7	Coronary heart disease	Coronary heart disease || ||	TRUE	igd	12	131213698	0.0206861	7.30718e-07	GCST90199629	Glycerophosphorylcholine (GPC) levels	8212	2	TRUE			0.00297917	8212	2.49359e-08	184305	TRUE	1.36855e-06	0.00291051	23.9651	29.788	24.5321
rs74420163	T	C	T	C	0.18549	0.010439	0.0368812	0.027748	FALSE	FALSE	FALSE	ieu-a-7	4	19055363	0.0345578	184305	0.762595	Coronary heart disease || id:ieu-a-7	Coronary heart disease	Coronary heart disease || ||	TRUE	igd	4	19053740	0.0409257	5.8326e-06	GCST90199629	Glycerophosphorylcholine (GPC) levels	8212	2	TRUE			0.00249586	8212	4.951e-07	184305	TRUE	1.24145e-05	0.00244431	20.1169	29.788	20.5423
rs74814187	T	C	T	C	0.158928	-0.010117	0.0546213	0.054159	FALSE	FALSE	FALSE	ieu-a-7	1	177074798	0.0211107	184305	0.631771	Coronary heart disease || id:ieu-a-7	Coronary heart disease	Coronary heart disease || ||	TRUE	igd	1	177105662	0.0336247	2.28402e-06	GCST90199629	Glycerophosphorylcholine (GPC) levels	8212	2	TRUE			0.00271369	8212	1.24614e-06	184305	TRUE	6.08781e-06	0.00260855	21.4722	29.788	22.34
rs75158623	A	T	A	T	0.144058	-0.001867	0.0607305	0.058916	FALSE	TRUE	FALSE	ieu-a-7	3	2697584	0.020447	184305	0.927247	Coronary heart disease || id:ieu-a-7	Coronary heart disease	Coronary heart disease || ||	TRUE	igd	3	2655900	0.0320058	6.76327e-06	GCST90199629	Glycerophosphorylcholine (GPC) levels	8212	2	TRUE			0.00246152	8212	4.52373e-08	184305	TRUE	1.17027e-05	0.00236756	19.4838	29.788	20.259
rs75275697	A	G	A	G	0.269422	0.021119	0.0162096	0.015061	FALSE	FALSE	FALSE	ieu-a-7	14	40244174	0.0426842	184305	0.62076	Coronary heart disease || id:ieu-a-7	Coronary heart disease	Coronary heart disease || ||	TRUE	igd	14	39774970	0.060459	8.3392e-06	GCST90199629	Glycerophosphorylcholine (GPC) levels	8212	2	TRUE			0.00241297	8212	1.32825e-06	184305	TRUE	2.08081e-05	0.00231511	19.0511	29.788	19.8584
rs77692382	T	C	T	C	0.124343	0.008656	0.249324	0.21904	FALSE	FALSE	FALSE	ieu-a-7	1	40406715	0.01147	184305	0.45045	Coronary heart disease || id:ieu-a-7	Coronary heart disease	Coronary heart disease || ||	TRUE	igd	1	39941043	0.0177226	2.28252e-12	GCST90199629	Glycerophosphorylcholine (GPC) levels	8212	2	TRUE			0.00596003	8212	3.09011e-06	184305	TRUE	2.0593e-11	0.00578748	47.7918	29.788	49.2252
rs9487777	C	G	C	G	-0.273645	-0.034171	0.0187874	0.024266	FALSE	TRUE	FALSE	ieu-a-7	6	112306520	0.0326307	184305	0.295005	Coronary heart disease || id:ieu-a-7	Coronary heart disease	Coronary heart disease || ||	TRUE	igd	6	111985317	0.0563802	1.21261e-06	GCST90199629	Glycerophosphorylcholine (GPC) levels	8212	2	TRUE			0.00286111	8212	5.95015e-06	184305	TRUE	5.89409e-06	0.0027608	22.7289	29.788	23.5571
rs9510701	T	C	T	C	0.173788	-0.001454	0.040562	0.040883	FALSE	FALSE	FALSE	ieu-a-7	13	23898693	0.0244054	184305	0.952493	Coronary heart disease || id:ieu-a-7	Coronary heart disease	Coronary heart disease || ||	TRUE	igd	13	23324554	0.0386321	6.84247e-06	GCST90199629	Glycerophosphorylcholine (GPC) levels	8212	2	TRUE			0.00245884	8212	1.92586e-08	184305	TRUE	1.14817e-05	0.00235075	19.3451	29.788	20.2369
rs1057157	C	T	C	T	0.0763559	-0.011649	0.356179	0.349369	FALSE	FALSE	FALSE	ieu-a-7	22	42779018	0.0098721	184305	0.238003	Coronary heart disease || id:ieu-a-7	Coronary heart disease	Coronary heart disease || ||	TRUE	igd	22	42383012	0.0171254	8.24826e-06	GCST90199630	Phenylacetate levels	7059	2	TRUE			0.00280907	7059	7.55479e-06	184305	TRUE	3.37283e-05	0.00267392	18.9205	29.788	19.8794
rs112192402	A	G	A	G	0.227703	-0.043616	0.0311454	0.030907	FALSE	FALSE	FALSE	ieu-a-7	12	68843244	0.0347424	184305	0.20933	Coronary heart disease || id:ieu-a-7	Coronary heart disease	Coronary heart disease || ||	TRUE	igd	12	68449464	0.0474027	1.55855e-06	GCST90199630	Phenylacetate levels	7059	2	TRUE			0.00325907	7059	8.55137e-06	184305	TRUE	7.8137e-06	0.0031291	22.1514	29.788	23.0744
rs117291585	T	C	T	C	0.241913	0.009014	0.0241775	0.022203	FALSE	FALSE	FALSE	ieu-a-7	20	58844539	0.0357168	184305	0.800752	Coronary heart disease || id:ieu-a-7	Coronary heart disease	Coronary heart disease || ||	TRUE	igd	20	60269481	0.052514	4.09221e-06	GCST90199630	Phenylacetate levels	7059	2	TRUE			0.00299809	7059	3.45587e-07	184305	TRUE	7.8269e-06	0.00276141	19.5412	29.788	21.2211
rs150248294	A	G	A	G	-0.377677	0.047793	0.0102142	0.012827	FALSE	FALSE	FALSE	ieu-a-7	12	57247522	0.0461353	184305	0.300234	Coronary heart disease || id:ieu-a-7	Coronary heart disease	Coronary heart disease || ||	TRUE	igd	12	56853738	0.080216	2.49851e-06	GCST90199630	Phenylacetate levels	7059	2	TRUE			0.00313139	7059	5.82273e-06	184305	TRUE	9.91749e-06	0.00288414	20.4123	29.788	22.1676
rs1604572	G	C	G	C	-0.0886552	0.015306	0.317746	0.298551	FALSE	TRUE	FALSE	ieu-a-7	3	131391712	0.010097	184305	0.129544	Coronary heart disease || id:ieu-a-7	Coronary heart disease	Coronary heart disease || ||	TRUE	igd	3	131672868	0.0174741	3.90507e-07	GCST90199630	Phenylacetate levels	7059	2	TRUE			0.00363427	7059	1.24681e-05	184305	TRUE	2.80451e-06	0.00340773	24.1305	29.788	25.7406
rs16943430	A	G	A	G	-0.199229	-0.05056	0.034759	0.048405	FALSE	FALSE	FALSE	ieu-a-7	18	24857568	0.022713	184305	0.0260118	Coronary heart disease || id:ieu-a-7	Coronary heart disease	Coronary heart disease || ||	TRUE	igd	18	27277604	0.0444659	7.44695e-06	GCST90199630	Phenylacetate levels	7059	2	TRUE			0.00283659	7059	2.68857e-05	184305	TRUE	7.27022e-05	0.00266341	18.8459	29.788	20.0748
rs180982609	C	T	C	T	-0.500304	-0.027101	0.0051231	0.012391	FALSE	FALSE	FALSE	ieu-a-7	6	91676104	0.063481	184305	0.669441	Coronary heart disease || id:ieu-a-7	Coronary heart disease	Coronary heart disease || ||	TRUE	igd	6	90966386	0.112894	9.35214e-06	GCST90199630	Phenylacetate levels	7059	2	TRUE			0.00277523	7059	9.88895e-07	184305	TRUE	2.00033e-05	0.00255153	18.0522	29.788	19.6393
rs188124348	C	T	C	T	0.358611	-0.003289	0.0125871	0.009112	FALSE	FALSE	FALSE	ieu-a-7	16	80574125	0.0732727	184305	0.964197	Coronary heart disease || id:ieu-a-7	Coronary heart disease	Coronary heart disease || ||	TRUE	igd	16	80540228	0.0731176	9.36257e-07	GCST90199630	Phenylacetate levels	7059	2	TRUE			0.00339708	7059	1.09323e-08	184305	TRUE	1.57391e-06	0.0031967	22.6314	29.788	24.0549
rs189587	A	G	A	G	0.0806004	-0.010423	0.432367	0.43032	FALSE	FALSE	FALSE	ieu-a-7	4	78500085	0.0094789	184305	0.271504	Coronary heart disease || id:ieu-a-7	Coronary heart disease	Coronary heart disease || ||	TRUE	igd	4	77578931	0.0164433	9.50008e-07	GCST90199630	Phenylacetate levels	7059	2	TRUE			0.00339313	7059	6.56046e-06	184305	TRUE	4.30097e-06	0.00318878	22.5752	29.788	24.0268
rs2632709	C	A	C	A	0.104046	-0.005322	0.148365	0.155015	FALSE	FALSE	FALSE	ieu-a-7	4	42373582	0.0128213	184305	0.678077	Coronary heart disease || id:ieu-a-7	Coronary heart disease	Coronary heart disease || ||	TRUE	igd	4	42371565	0.0228286	5.17192e-06	GCST90199630	Phenylacetate levels	7059	2	TRUE			0.00293492	7059	9.34873e-07	184305	TRUE	1.13002e-05	0.00273568	19.3587	29.788	20.7727
rs3809205	C	T	C	T	0.182025	-0.006596	0.0434628	0.051295	FALSE	FALSE	FALSE	ieu-a-7	12	22197751	0.0205296	184305	0.747989	Coronary heart disease || id:ieu-a-7	Coronary heart disease	Coronary heart disease || ||	TRUE	igd	12	22044817	0.0399238	5.13238e-06	GCST90199630	Phenylacetate levels	7059	2	TRUE			0.00293698	7059	5.60103e-07	184305	TRUE	1.03248e-05	0.00275494	19.4953	29.788	20.7873
rs3856733	G	C	G	C	-0.0881978	-0.002323	0.300579	0.317237	FALSE	TRUE	FALSE	ieu-a-7	3	42147693	0.0103587	184305	0.822559	Coronary heart disease || id:ieu-a-7	Coronary heart disease	Coronary heart disease || ||	TRUE	igd	3	42106201	0.0180229	9.89884e-07	GCST90199630	Phenylacetate levels	7059	2	TRUE			0.00338201	7059	2.7287e-07	184305	TRUE	1.9701e-06	0.00327072	23.1572	29.788	23.9478
rs59532339	T	A	T	A	0.461097	0.01412	0.0235728	0.05229	FALSE	TRUE	FALSE	ieu-a-7	16	20579672	0.0232855	184305	0.544258	Coronary heart disease || id:ieu-a-7	Coronary heart disease	Coronary heart disease || ||	TRUE	igd	16	20568350	0.0539542	1.2734e-17	GCST90199630	Phenylacetate levels	7059	2	TRUE			0.0102434	7059	1.9951e-06	184305	TRUE	1.51132e-16	0.00978736	69.7521	29.788	73.0355
rs6566598	C	T	C	T	-0.206029	0.018406	0.966004	0.862571	FALSE	FALSE	FALSE	ieu-a-7	18	69937404	0.0203395	184305	0.365497	Coronary heart disease || id:ieu-a-7	Coronary heart disease	Coronary heart disease || ||	TRUE	igd	18	72270169	0.0456208	6.2986e-06	GCST90199630	Phenylacetate levels	7059	2	TRUE			0.00288176	7059	4.44328e-06	184305	TRUE	2.08247e-05	0.002788	19.73	29.788	20.3953
rs7196912	T	C	T	C	0.225688	-0.004821	0.0315558	0.044897	FALSE	FALSE	FALSE	ieu-a-7	16	20600612	0.0234473	184305	0.837096	Coronary heart disease || id:ieu-a-7	Coronary heart disease	Coronary heart disease || ||	TRUE	igd	16	20589290	0.0462149	1.04254e-06	GCST90199630	Phenylacetate levels	7059	2	TRUE			0.00336797	7059	2.2938e-07	184305	TRUE	2.03366e-06	0.00311315	22.0381	29.788	23.8481
rs72825080	C	T	C	T	-0.15323	0.035629	0.0592908	0.053464	FALSE	FALSE	FALSE	ieu-a-7	2	102051291	0.0277229	184305	0.198728	Coronary heart disease || id:ieu-a-7	Coronary heart disease	Coronary heart disease || ||	TRUE	igd	2	101434829	0.0342299	7.58803e-06	GCST90199630	Phenylacetate levels	7059	2	TRUE			0.00283155	7059	8.96177e-06	184305	TRUE	3.41276e-05	0.00261915	18.5319	29.788	20.039
rs73057725	A	G	A	G	0.222167	-0.064847	0.0350404	0.0322	FALSE	FALSE	FALSE	ieu-a-7	7	5434107	0.0406279	184305	0.110462	Coronary heart disease || id:ieu-a-7	Coronary heart disease	Coronary heart disease || ||	TRUE	igd	7	5394476	0.0444899	5.92485e-07	GCST90199630	Phenylacetate levels	7059	2	TRUE			0.00352115	7059	1.38227e-05	184305	TRUE	4.4113e-06	0.00333785	23.6341	29.788	24.9365
rs7526830	C	T	C	T	0.11933	-0.005861	0.113773	0.110879	FALSE	FALSE	FALSE	ieu-a-7	1	168644383	0.0152524	184305	0.70078	Coronary heart disease || id:ieu-a-7	Coronary heart disease	Coronary heart disease || ||	TRUE	igd	1	168675145	0.0256291	3.22345e-06	GCST90199630	Phenylacetate levels	7059	2	TRUE			0.00306253	7059	8.01188e-07	184305	TRUE	7.02468e-06	0.00287153	20.3227	29.788	21.6787
rs76151544	G	A	G	A	-0.249151	-0.026133	0.0227109	0.020133	FALSE	FALSE	FALSE	ieu-a-7	7	15801860	0.0425723	184305	0.539314	Coronary heart disease || id:ieu-a-7	Coronary heart disease	Coronary heart disease || ||	TRUE	igd	7	15762235	0.0549946	5.88542e-06	GCST90199630	Phenylacetate levels	7059	2	TRUE			0.00290004	7059	2.04452e-06	184305	TRUE	1.51972e-05	0.00275558	19.4998	29.788	20.5251
rs76318294	G	T	G	T	-0.131138	0.012459	0.084973	0.075746	FALSE	FALSE	FALSE	ieu-a-7	1	230554357	0.0199756	184305	0.532817	Coronary heart disease || id:ieu-a-7	Coronary heart disease	Coronary heart disease || ||	TRUE	igd	1	230418611	0.029682	9.95725e-06	GCST90199630	Phenylacetate levels	7059	2	TRUE			0.00275836	7059	2.11073e-06	184305	TRUE	2.51101e-05	0.00267425	18.9228	29.788	19.5196
rs76379382	T	C	T	C	-0.160195	-0.013799	0.054898	0.047256	FALSE	FALSE	FALSE	ieu-a-7	15	65289551	0.025382	184305	0.58668	Coronary heart disease || id:ieu-a-7	Coronary heart disease	Coronary heart disease || ||	TRUE	igd	15	64997213	0.0358753	7.99391e-06	GCST90199630	Phenylacetate levels	7059	2	TRUE			0.00281748	7059	1.60365e-06	184305	TRUE	1.9074e-05	0.00266295	18.8426	29.788	19.9392
rs76447789	G	A	G	A	-0.443571	-0.100214	0.00680658	0.009017	FALSE	FALSE	FALSE	ieu-a-7	3	25461745	0.0698911	184305	0.151612	Coronary heart disease || id:ieu-a-7	Coronary heart disease	Coronary heart disease || ||	TRUE	igd	3	25420254	0.0992982	7.93008e-06	GCST90199630	Phenylacetate levels	7059	2	TRUE			0.00281966	7059	1.11552e-05	184305	TRUE	4.02186e-05	0.00266023	18.8233	29.788	19.9546
rs78580580	C	A	C	A	-0.294915	-0.026855	0.017728	0.034371	FALSE	FALSE	FALSE	ieu-a-7	12	104844152	0.0288939	184305	0.352664	Coronary heart disease || id:ieu-a-7	Coronary heart disease	Coronary heart disease || ||	TRUE	igd	12	104450374	0.0614523	1.59391e-06	GCST90199630	Phenylacetate levels	7059	2	TRUE			0.00325299	7059	4.68709e-06	184305	TRUE	5.94283e-06	0.00302911	21.4414	29.788	23.0312
rs8001043	C	T	C	T	-0.0811984	0.020146	0.693867	0.666278	FALSE	FALSE	FALSE	ieu-a-7	13	35327976	0.0105727	184305	0.0567192	Coronary heart disease || id:ieu-a-7	Coronary heart disease	Coronary heart disease || ||	TRUE	igd	13	34753839	0.0177149	4.57013e-06	GCST90199630	Phenylacetate levels	7059	2	TRUE			0.00296829	7059	1.96999e-05	184305	TRUE	3.62954e-05	0.00280099	19.8221	29.788	21.0096
rs116943713	G	A	G	A	0.209966	-0.00314	0.0274457	0.029144	FALSE	FALSE	FALSE	ieu-a-7	14	29087388	0.0306689	184305	0.918452	Coronary heart disease || id:ieu-a-7	Coronary heart disease	Coronary heart disease || ||	TRUE	igd	14	28618182	0.0460722	5.18093e-06	GCST90199631	3-methyl-2-oxovalerate levels	8257	2	TRUE			0.00250964	8257	5.68762e-08	184305	TRUE	9.19678e-06	0.00235351	19.4741	29.788	20.7692
rs12716450	T	C	T	C	0.295968	0.01468	0.0128564	0.009524	FALSE	FALSE	FALSE	ieu-a-7	5	92814399	0.0714032	184305	0.837109	Coronary heart disease || id:ieu-a-7	Coronary heart disease	Coronary heart disease || ||	TRUE	igd	5	93478693	0.065473	6.17051e-06	GCST90199631	3-methyl-2-oxovalerate levels	8257	2	TRUE			0.0024693	8257	2.29342e-07	184305	TRUE	1.19853e-05	0.00222341	18.3951	29.788	20.4345
rs142461926	G	A	G	A	-0.220081	0.034401	0.026332	0.019565	FALSE	FALSE	FALSE	ieu-a-7	14	26044660	0.0454575	184305	0.449186	Coronary heart disease || id:ieu-a-7	Coronary heart disease	Coronary heart disease || ||	TRUE	igd	14	25575454	0.0468793	2.67075e-06	GCST90199631	3-methyl-2-oxovalerate levels	8257	2	TRUE			0.00266273	8257	3.1074e-06	184305	TRUE	9.25397e-06	0.00248365	20.5536	29.788	22.0396
rs145992024	T	C	T	C	-0.347476	0.047667	0.0102986	0.01671	FALSE	FALSE	FALSE	ieu-a-7	12	24437927	0.0453315	184305	0.293019	Coronary heart disease || id:ieu-a-7	Coronary heart disease	Coronary heart disease || ||	TRUE	igd	12	24284993	0.0734813	2.2589e-06	GCST90199631	3-methyl-2-oxovalerate levels	8257	2	TRUE			0.00270149	8257	5.9993e-06	184305	TRUE	1.05183e-05	0.00246129	20.368	29.788	22.3612
rs34372879	C	T	C	T	-0.0947061	0.00724	0.148723	0.136556	FALSE	FALSE	FALSE	ieu-a-7	6	41492155	0.0145051	184305	0.617683	Coronary heart disease || id:ieu-a-7	Coronary heart disease	Coronary heart disease || ||	TRUE	igd	6	41524417	0.0213272	8.96987e-06	GCST90199631	3-methyl-2-oxovalerate levels	8257	2	TRUE			0.00238306	8257	1.35177e-06	184305	TRUE	2.24441e-05	0.00227109	18.7905	29.788	19.7192
rs56107485	C	A	C	A	-0.154962	0.024733	0.0606153	0.053877	FALSE	FALSE	FALSE	ieu-a-7	6	156838561	0.0219537	184305	0.259912	Coronary heart disease || id:ieu-a-7	Coronary heart disease	Coronary heart disease || ||	TRUE	igd	6	156517427	0.0310005	5.77179e-07	GCST90199631	3-methyl-2-oxovalerate levels	8257	2	TRUE			0.00301775	8257	6.88657e-06	184305	TRUE	3.24965e-06	0.00273468	22.6367	29.788	24.9869
rs58693102	A	G	A	G	-0.187799	0.043431	0.0331267	0.023899	FALSE	FALSE	FALSE	ieu-a-7	21	41766824	0.0345719	184305	0.209024	Coronary heart disease || id:ieu-a-7	Coronary heart disease	Coronary heart disease || ||	TRUE	igd	21	40394897	0.0414491	5.87507e-06	GCST90199631	3-methyl-2-oxovalerate levels	8257	2	TRUE			0.00248062	8257	8.56282e-06	184305	TRUE	3.03977e-05	0.00225925	18.6923	29.788	20.5285
rs58729469	T	C	T	C	0.101193	0.000908	0.159259	0.146336	FALSE	FALSE	FALSE	ieu-a-7	11	36071833	0.0136828	184305	0.947091	Coronary heart disease || id:ieu-a-7	Coronary heart disease	Coronary heart disease || ||	TRUE	igd	11	36050283	0.0201862	5.35894e-07	GCST90199631	3-methyl-2-oxovalerate levels	8257	2	TRUE			0.00303497	8257	2.3894e-08	184305	TRUE	1.01949e-06	0.00274219	22.699	29.788	25.13
rs6055350	C	G	C	G	-0.215685	-0.001298	0.962906	0.951988	FALSE	TRUE	FALSE	ieu-a-7	20	839515	0.0271189	184305	0.961825	Coronary heart disease || id:ieu-a-7	Coronary heart disease	Coronary heart disease || ||	TRUE	igd	20	858872	0.0396894	5.50013e-08	GCST90199631	3-methyl-2-oxovalerate levels	8257	2	TRUE			0.0035647	8257	1.243e-08	184305	TRUE	1.13804e-07	0.00332321	27.5245	29.788	29.5319
rs62524533	A	G	A	G	-0.110404	0.02024	0.101178	0.111399	FALSE	FALSE	FALSE	ieu-a-7	8	135052332	0.0154936	184305	0.191434	Coronary heart disease || id:ieu-a-7	Coronary heart disease	Coronary heart disease || ||	TRUE	igd	8	134040089	0.0244676	6.41459e-06	GCST90199631	3-methyl-2-oxovalerate levels	8257	2	TRUE			0.00246037	8257	9.25934e-06	184305	TRUE	3.44381e-05	0.00221697	18.3417	29.788	20.3604
rs6754181	C	T	C	T	0.0910083	-0.009468	0.840543	0.812257	FALSE	FALSE	FALSE	ieu-a-7	2	29966380	0.0124683	184305	0.447634	Coronary heart disease || id:ieu-a-7	Coronary heart disease	Coronary heart disease || ||	TRUE	igd	2	29743514	0.0204779	8.82143e-06	GCST90199631	3-methyl-2-oxovalerate levels	8257	2	TRUE			0.00238691	8257	3.12873e-06	184305	TRUE	2.80542e-05	0.00222022	18.3687	29.788	19.7511
rs7660693	C	T	C	T	0.0791272	2e-05	0.497027	0.488749	FALSE	FALSE	FALSE	ieu-a-7	4	89228383	0.009216	184305	0.998268	Coronary heart disease || id:ieu-a-7	Coronary heart disease	Coronary heart disease || ||	TRUE	igd	4	88307231	0.0148481	9.86958e-08	GCST90199631	3-methyl-2-oxovalerate levels	8257	2	TRUE			0.00342848	8257	2.5553e-11	184305	TRUE	1.88948e-07	0.00313045	25.923	29.788	28.3994
rs77291466	C	T	C	T	-0.12259	0.026137	0.0806922	0.078623	FALSE	FALSE	FALSE	ieu-a-7	5	59621825	0.0177302	184305	0.140441	Coronary heart disease || id:ieu-a-7	Coronary heart disease	Coronary heart disease || ||	TRUE	igd	5	60325998	0.0272328	6.74582e-06	GCST90199631	3-methyl-2-oxovalerate levels	8257	2	TRUE			0.00244875	8257	1.17909e-05	184305	TRUE	4.18997e-05	0.00222963	18.4467	29.788	20.264
rs77876488	T	C	T	C	-0.177185	0.000901	0.0472576	0.047806	FALSE	FALSE	FALSE	ieu-a-7	18	10810831	0.0229943	184305	0.968744	Coronary heart disease || id:ieu-a-7	Coronary heart disease	Coronary heart disease || ||	TRUE	igd	18	10810833	0.0350913	4.43549e-07	GCST90199631	3-methyl-2-oxovalerate levels	8257	2	TRUE			0.00307892	8257	8.33061e-09	184305	TRUE	8.26931e-07	0.00282703	23.4033	29.788	25.495
rs10004542	G	A	G	A	0.0814848	0.00301	0.340258	0.34272	FALSE	FALSE	FALSE	ieu-a-7	4	4720455	0.0096929	184305	0.756152	Coronary heart disease || id:ieu-a-7	Coronary heart disease	Coronary heart disease || ||	TRUE	igd	4	4718728	0.0176888	4.09376e-06	GCST90199632	Tartarate levels	7099	2	TRUE			0.00298116	7099	5.2323e-07	184305	TRUE	8.27221e-06	0.00298103	21.2196	29.788	21.2205
rs10247649	G	A	G	A	-0.0826258	-0.006	0.344838	0.385925	FALSE	FALSE	FALSE	ieu-a-7	7	95216247	0.0095821	184305	0.531204	Coronary heart disease || id:ieu-a-7	Coronary heart disease	Coronary heart disease || ||	TRUE	igd	7	95586935	0.0178465	3.65988e-06	GCST90199632	Tartarate levels	7099	2	TRUE			0.00301121	7099	2.12739e-06	184305	TRUE	9.87013e-06	0.00308479	21.9605	29.788	21.4351
rs10945808	T	C	T	C	-0.130904	0.01669	0.0976838	0.11587	FALSE	FALSE	FALSE	ieu-a-7	6	162720194	0.0152644	184305	0.274221	Coronary heart disease || id:ieu-a-7	Coronary heart disease	Coronary heart disease || ||	TRUE	igd	6	162299162	0.0285309	4.47212e-06	GCST90199632	Tartarate levels	7099	2	TRUE			0.00295743	7099	6.48661e-06	184305	TRUE	1.79299e-05	0.00302077	21.5033	29.788	21.0511
rs115272033	C	T	C	T	-0.170179	-0.01213	0.0492451	0.045387	FALSE	FALSE	FALSE	ieu-a-7	6	31850807	0.0239307	184305	0.612239	Coronary heart disease || id:ieu-a-7	Coronary heart disease	Coronary heart disease || ||	TRUE	igd	6	31883030	0.0381431	8.13534e-06	GCST90199632	Tartarate levels	7099	2	TRUE			0.00279698	7099	1.39405e-06	184305	TRUE	1.88448e-05	0.0027119	19.2987	29.788	19.9058
rs116626434	A	G	A	G	-0.149526	-0.000425	0.0721524	0.055775	FALSE	FALSE	FALSE	ieu-a-7	1	83641377	0.0256362	184305	0.986773	Coronary heart disease || id:ieu-a-7	Coronary heart disease	Coronary heart disease || ||	TRUE	igd	1	83175694	0.0320676	3.11891e-06	GCST90199632	Tartarate levels	7099	2	TRUE			0.0030542	7099	1.49121e-09	184305	TRUE	4.88336e-06	0.00299358	21.3092	29.788	21.7421
rs117483011	A	G	A	G	-0.157832	0.018073	0.0595121	0.048882	FALSE	FALSE	FALSE	ieu-a-7	8	3196910	0.0257817	184305	0.483302	Coronary heart disease || id:ieu-a-7	Coronary heart disease	Coronary heart disease || ||	TRUE	igd	8	3339388	0.0354548	8.52127e-06	GCST90199632	Tartarate levels	7099	2	TRUE			0.00278454	7099	2.66627e-06	184305	TRUE	2.32628e-05	0.00278855	19.8457	29.788	19.8171
rs13089230	A	G	A	G	0.0825424	0.013767	0.621953	0.57796	FALSE	FALSE	FALSE	ieu-a-7	3	177554204	0.0093768	184305	0.142048	Coronary heart disease || id:ieu-a-7	Coronary heart disease	Coronary heart disease || ||	TRUE	igd	3	177836416	0.0175787	2.65821e-06	GCST90199632	Tartarate levels	7099	2	TRUE			0.00309712	7099	1.16959e-05	184305	TRUE	1.54395e-05	0.00320396	22.8116	29.788	22.0486
rs138430505	C	T	C	T	0.285026	-0.048643	0.0178748	0.018867	FALSE	FALSE	FALSE	ieu-a-7	2	26178621	0.0458268	184305	0.288484	Coronary heart disease || id:ieu-a-7	Coronary heart disease	Coronary heart disease || ||	TRUE	igd	2	25955752	0.0624394	4.9989e-06	GCST90199632	Tartarate levels	7099	2	TRUE			0.00292754	7099	6.11317e-06	184305	TRUE	1.9326e-05	0.00285238	20.3012	29.788	20.8378
rs141660852	T	C	T	C	0.228649	-0.012992	0.029224	0.029996	FALSE	FALSE	FALSE	ieu-a-7	18	60032338	0.0297608	184305	0.662439	Coronary heart disease || id:ieu-a-7	Coronary heart disease	Coronary heart disease || ||	TRUE	igd	18	62365105	0.0493121	3.53868e-06	GCST90199632	Tartarate levels	7099	2	TRUE			0.00302025	7099	1.03402e-06	184305	TRUE	8.06929e-06	0.00296638	21.1151	29.788	21.4997
rs142959592	T	C	T	C	-0.373738	0.035212	0.0106022	0.010357	FALSE	FALSE	FALSE	ieu-a-7	11	76832372	0.0546767	184305	0.519574	Coronary heart disease || id:ieu-a-7	Coronary heart disease	Coronary heart disease || ||	TRUE	igd	11	77121326	0.0817952	4.89608e-06	GCST90199632	Tartarate levels	7099	2	TRUE			0.00293311	7099	2.25032e-06	184305	TRUE	1.31749e-05	0.00293043	20.8584	29.788	20.8775
rs143000803	T	A	T	A	0.368352	0.023974	0.0112878	0.015949	FALSE	TRUE	FALSE	ieu-a-7	7	126948038	0.04734	184305	0.612561	Coronary heart disease || id:ieu-a-7	Coronary heart disease	Coronary heart disease || ||	TRUE	igd	7	127307984	0.0789907	3.11275e-06	GCST90199632	Tartarate levels	7099	2	TRUE			0.00305471	7099	1.39153e-06	184305	TRUE	7.61234e-06	0.00302855	21.5589	29.788	21.7457
rs17026163	T	C	T	C	-0.223964	0.033147	0.032701	0.031172	FALSE	FALSE	FALSE	ieu-a-7	2	102445645	0.0278087	184305	0.233275	Coronary heart disease || id:ieu-a-7	Coronary heart disease	Coronary heart disease || ||	TRUE	igd	2	101829183	0.0470413	1.92634e-06	GCST90199632	Tartarate levels	7099	2	TRUE			0.00318374	7099	7.70888e-06	184305	TRUE	9.01276e-06	0.00317328	22.5925	29.788	22.6672
rs298392	T	C	T	C	0.087711	-0.001616	0.28972	0.303443	FALSE	FALSE	FALSE	ieu-a-7	5	73847897	0.0103979	184305	0.876493	Coronary heart disease || id:ieu-a-7	Coronary heart disease	Coronary heart disease || ||	TRUE	igd	5	74552072	0.0186612	2.59941e-06	GCST90199632	Tartarate levels	7099	2	TRUE			0.00310316	7099	1.31057e-07	184305	TRUE	4.6589e-06	0.00316626	22.5423	29.788	22.0917
rs628038	C	T	C	T	-0.0783007	0.014917	0.386617	0.359587	FALSE	FALSE	FALSE	ieu-a-7	6	74325257	0.0097417	184305	0.125709	Coronary heart disease || id:ieu-a-7	Coronary heart disease	Coronary heart disease || ||	TRUE	igd	6	73615534	0.0170337	4.2902e-06	GCST90199632	Tartarate levels	7099	2	TRUE			0.00296857	7099	1.2722e-05	184305	TRUE	2.51551e-05	0.00290786	20.6973	29.788	21.1307
rs75583177	G	A	G	A	-0.145169	-0.008685	0.0701345	0.066972	FALSE	FALSE	FALSE	ieu-a-7	2	140644704	0.0186959	184305	0.642262	Coronary heart disease || id:ieu-a-7	Coronary heart disease	Coronary heart disease || ||	TRUE	igd	2	139887135	0.032432	7.60113e-06	GCST90199632	Tartarate levels	7099	2	TRUE			0.00281515	7099	1.17088e-06	184305	TRUE	1.70393e-05	0.00274871	19.5614	29.788	20.0355
rs76501568	T	C	T	C	-0.267429	0.055075	0.02066	0.012737	FALSE	FALSE	FALSE	ieu-a-7	2	199959803	0.0622991	184305	0.376674	Coronary heart disease || id:ieu-a-7	Coronary heart disease	Coronary heart disease || ||	TRUE	igd	2	199095080	0.0587195	5.2548e-06	GCST90199632	Tartarate levels	7099	2	TRUE			0.00291414	7099	4.24044e-06	184305	TRUE	1.73581e-05	0.00289408	20.5989	29.788	20.7421
rs77798428	A	G	A	G	-0.318661	-0.016392	0.0184793	0.036527	FALSE	FALSE	FALSE	ieu-a-7	15	58668401	0.0232724	184305	0.481213	Coronary heart disease || id:ieu-a-7	Coronary heart disease	Coronary heart disease || ||	TRUE	igd	15	58376202	0.0614021	2.10597e-07	GCST90199632	Tartarate levels	7099	2	TRUE			0.00378069	7099	2.69183e-06	184305	TRUE	7.29153e-07	0.0036836	26.2392	29.788	26.9334
rs79983252	A	C	A	C	0.236427	0.033211	0.0301043	0.023587	FALSE	FALSE	FALSE	ieu-a-7	1	175585513	0.0372213	184305	0.372255	Coronary heart disease || id:ieu-a-7	Coronary heart disease	Coronary heart disease || ||	TRUE	igd	1	175616377	0.0486249	1.16058e-06	GCST90199632	Tartarate levels	7099	2	TRUE			0.00332015	7099	4.31963e-06	184305	TRUE	4.29657e-06	0.00326421	23.2419	29.788	23.6416
rs9948951	A	G	A	G	-0.0971868	0.008879	0.184827	0.181882	FALSE	FALSE	FALSE	ieu-a-7	18	8592788	0.0126421	184305	0.48247	Coronary heart disease || id:ieu-a-7	Coronary heart disease	Coronary heart disease || ||	TRUE	igd	18	8592790	0.0214343	5.78302e-06	GCST90199632	Tartarate levels	7099	2	TRUE			0.00288845	7099	2.67643e-06	184305	TRUE	1.62051e-05	0.00284616	20.2569	29.788	20.5587
rs10008401	C	T	C	T	0.0800086	-0.018032	0.609542	0.599889	FALSE	FALSE	FALSE	ieu-a-7	4	117779937	0.0093344	184305	0.0533863	Coronary heart disease || id:ieu-a-7	Coronary heart disease	Coronary heart disease || ||	TRUE	igd	4	116858781	0.0170477	2.68944e-06	GCST90199633	Suberate (C8-DC) levels	6902	2	TRUE			0.00318206	6902	2.02476e-05	184305	TRUE	2.25478e-05	0.00304706	21.089	29.788	22.0263
rs11158833	G	A	G	A	-0.0922378	-0.003951	0.759084	0.726356	FALSE	FALSE	FALSE	ieu-a-7	14	70578411	0.0108291	184305	0.715224	Coronary heart disease || id:ieu-a-7	Coronary heart disease	Coronary heart disease || ||	TRUE	igd	14	70111694	0.0196709	2.74475e-06	GCST90199633	Suberate (C8-DC) levels	6902	2	TRUE			0.00317643	6902	7.22265e-07	184305	TRUE	5.85399e-06	0.00311174	21.538	29.788	21.9872
rs11705994	T	C	T	C	0.218723	-0.034827	0.0297142	0.033527	FALSE	FALSE	FALSE	ieu-a-7	3	73368081	0.0291329	184305	0.23191	Coronary heart disease || id:ieu-a-7	Coronary heart disease	Coronary heart disease || ||	TRUE	igd	3	73318930	0.0493421	9.30183e-06	GCST90199633	Suberate (C8-DC) levels	6902	2	TRUE			0.00283968	6902	7.75406e-06	184305	TRUE	3.74586e-05	0.00275856	19.0867	29.788	19.6496
rs117499033	G	A	G	A	0.30721	0.07718	0.0142545	0.013422	FALSE	FALSE	FALSE	ieu-a-7	18	42578174	0.0468544	184305	0.0995108	Coronary heart disease || id:ieu-a-7	Coronary heart disease	Coronary heart disease || ||	TRUE	igd	18	44998209	0.0691456	8.87382e-06	GCST90199633	Suberate (C8-DC) levels	6902	2	TRUE			0.00285267	6902	1.47221e-05	184305	TRUE	5.1931e-05	0.00265227	18.3493	29.788	19.7397
rs12555229	G	C	G	C	-0.0955533	0.025206	0.250852	0.279294	FALSE	TRUE	FALSE	ieu-a-7	9	138679911	0.0119806	184305	0.0353867	Coronary heart disease || id:ieu-a-7	Coronary heart disease	Coronary heart disease || ||	TRUE	igd	9	135788065	0.0196317	1.13142e-06	GCST90199633	Suberate (C8-DC) levels	6902	2	TRUE			0.00342167	6902	2.40164e-05	184305	TRUE	1.20899e-05	0.00343168	23.7601	29.788	23.6906
rs140580838	A	G	A	G	0.308493	0.018043	0.0145645	0.015434	FALSE	FALSE	FALSE	ieu-a-7	8	109989934	0.0601385	184305	0.764159	Coronary heart disease || id:ieu-a-7	Coronary heart disease	Coronary heart disease || ||	TRUE	igd	8	108977705	0.0695392	9.15411e-06	GCST90199633	Suberate (C8-DC) levels	6902	2	TRUE			0.0028441	6902	4.88405e-07	184305	TRUE	1.73828e-05	0.00273177	18.9009	29.788	19.6803
rs141183746	C	A	C	A	0.161019	0.066103	0.0572184	0.035305	FALSE	FALSE	FALSE	ieu-a-7	6	164343235	0.0326513	184305	0.0429181	Coronary heart disease || id:ieu-a-7	Coronary heart disease	Coronary heart disease || ||	TRUE	igd	6	163922203	0.0364413	9.93437e-06	GCST90199633	Suberate (C8-DC) levels	6902	2	TRUE			0.00282157	6902	2.22382e-05	184305	TRUE	7.77546e-05	0.00279725	19.3552	29.788	19.5239
rs146529314	G	T	G	T	0.336938	0.032167	0.0147642	0.009751	FALSE	FALSE	FALSE	ieu-a-7	7	105648375	0.0729544	184305	0.659271	Coronary heart disease || id:ieu-a-7	Coronary heart disease	Coronary heart disease || ||	TRUE	igd	7	106007929	0.0697181	1.34585e-06	GCST90199633	Suberate (C8-DC) levels	6902	2	TRUE			0.00337359	6902	1.05484e-06	184305	TRUE	3.19141e-06	0.00330278	22.8647	29.788	23.3566
rs1551619	T	C	T	C	-0.0957862	-0.025146	0.230903	0.220572	FALSE	FALSE	FALSE	ieu-a-7	17	73885805	0.0114222	184305	0.0277007	Coronary heart disease || id:ieu-a-7	Coronary heart disease	Coronary heart disease || ||	TRUE	igd	17	75889724	0.0197795	1.28083e-06	GCST90199633	Suberate (C8-DC) levels	6902	2	TRUE			0.00338729	6902	2.62963e-05	184305	TRUE	1.4688e-05	0.00325872	22.5587	29.788	23.4518
rs17738405	C	T	C	T	-0.193637	-0.035006	0.0453877	0.041028	FALSE	FALSE	FALSE	ieu-a-7	7	3275523	0.027435	184305	0.20197	Coronary heart disease || id:ieu-a-7	Coronary heart disease	Coronary heart disease || ||	TRUE	igd	7	3235891	0.0395206	9.60098e-07	GCST90199633	Suberate (C8-DC) levels	6902	2	TRUE			0.00346715	6902	8.83362e-06	184305	TRUE	4.99653e-06	0.00324917	22.4923	29.788	24.0065
rs189725310	T	C	T	C	-0.167962	0.000761	0.0547126	0.049217	FALSE	FALSE	FALSE	ieu-a-7	2	209613230	0.0236092	184305	0.974286	Coronary heart disease || id:ieu-a-7	Coronary heart disease	Coronary heart disease || ||	TRUE	igd	2	208748506	0.0363969	3.9362e-06	GCST90199633	Suberate (C8-DC) levels	6902	2	TRUE			0.00307685	6902	5.63734e-09	184305	TRUE	6.12769e-06	0.00291812	20.194	29.788	21.2958
rs34357043	G	T	G	T	0.266628	-0.059893	0.0233082	0.018258	FALSE	FALSE	FALSE	ieu-a-7	4	31927358	0.0529908	184305	0.25837	Coronary heart disease || id:ieu-a-7	Coronary heart disease	Coronary heart disease || ||	TRUE	igd	4	31925736	0.0551228	1.31829e-06	GCST90199633	Suberate (C8-DC) levels	6902	2	TRUE			0.00337932	6902	6.93132e-06	184305	TRUE	5.86505e-06	0.00323674	22.406	29.788	23.3964
rs35904890	T	C	T	C	-0.227287	-0.039637	0.0284364	0.020957	FALSE	FALSE	FALSE	ieu-a-7	11	8670776	0.0449849	184305	0.378254	Coronary heart disease || id:ieu-a-7	Coronary heart disease	Coronary heart disease || ||	TRUE	igd	11	8649229	0.0499103	5.26594e-06	GCST90199633	Suberate (C8-DC) levels	6902	2	TRUE			0.00299651	6902	4.21244e-06	184305	TRUE	1.69979e-05	0.00285447	19.7522	29.788	20.7381
rs4689177	T	C	T	C	0.108829	0.024775	0.144896	0.17043	FALSE	FALSE	FALSE	ieu-a-7	4	4594474	0.0123662	184305	0.0451294	Coronary heart disease || id:ieu-a-7	Coronary heart disease	Coronary heart disease || ||	TRUE	igd	4	4592747	0.023723	4.48615e-06	GCST90199633	Suberate (C8-DC) levels	6902	2	TRUE			0.00304073	6902	2.17777e-05	184305	TRUE	3.77571e-05	0.00293491	20.3105	29.788	21.0451
rs4695288	T	C	T	C	0.200323	0.030852	0.965304	0.922109	FALSE	FALSE	FALSE	ieu-a-7	4	47854773	0.0274481	184305	0.261008	Coronary heart disease || id:ieu-a-7	Coronary heart disease	Coronary heart disease || ||	TRUE	igd	4	47852756	0.0453191	9.85766e-06	GCST90199633	Suberate (C8-DC) levels	6902	2	TRUE			0.00282372	6902	6.85499e-06	184305	TRUE	3.72465e-05	0.00268804	18.5974	29.788	19.5389
rs6914551	C	T	C	T	-0.366135	0.025379	0.011276	0.040097	FALSE	FALSE	FALSE	ieu-a-7	6	107134706	0.0247802	184305	0.305757	Coronary heart disease || id:ieu-a-7	Coronary heart disease	Coronary heart disease || ||	TRUE	igd	6	106686831	0.0791195	3.69883e-06	GCST90199633	Suberate (C8-DC) levels	6902	2	TRUE			0.003094	6902	5.69121e-06	184305	TRUE	1.3855e-05	0.00298912	20.6867	29.788	21.4149
rs6923178	G	C	G	C	0.121756	0.008625	0.119895	0.111753	FALSE	TRUE	FALSE	ieu-a-7	6	80393740	0.0151373	184305	0.568824	Coronary heart disease || id:ieu-a-7	Coronary heart disease	Coronary heart disease || ||	TRUE	igd	6	79684023	0.025941	2.68478e-06	GCST90199633	Suberate (C8-DC) levels	6902	2	TRUE			0.00318254	6902	1.76152e-06	184305	TRUE	6.88855e-06	0.00312857	21.6549	29.788	22.0296
rs7616744	A	G	A	G	-0.0876962	0.003155	0.223816	0.194304	FALSE	FALSE	FALSE	ieu-a-7	3	24781687	0.012024	184305	0.79302	Coronary heart disease || id:ieu-a-7	Coronary heart disease	Coronary heart disease || ||	TRUE	igd	3	24740196	0.0198179	9.63944e-06	GCST90199633	Suberate (C8-DC) levels	6902	2	TRUE			0.00282987	6902	3.73567e-07	184305	TRUE	1.76813e-05	0.00267207	18.4867	29.788	19.5815
rs78440527	G	A	G	A	0.199278	-0.060713	0.0359116	0.023064	FALSE	FALSE	FALSE	ieu-a-7	4	102786047	0.0334802	184305	0.0697702	Coronary heart disease || id:ieu-a-7	Coronary heart disease	Coronary heart disease || ||	TRUE	igd	4	101864890	0.0447114	8.31185e-06	GCST90199633	Suberate (C8-DC) levels	6902	2	TRUE			0.00287068	6902	1.78421e-05	184305	TRUE	5.60237e-05	0.0027498	19.0259	29.788	19.8647
rs848290	T	A	T	A	-0.165088	-0.01474	0.068549	0.064412	FALSE	TRUE	FALSE	ieu-a-7	2	58389182	0.0200896	184305	0.463125	Coronary heart disease || id:ieu-a-7	Coronary heart disease	Coronary heart disease || ||	TRUE	igd	2	58162047	0.0330302	5.79013e-07	GCST90199633	Suberate (C8-DC) levels	6902	2	TRUE			0.00360736	6902	2.92091e-06	184305	TRUE	1.89407e-06	0.00348034	24.0982	29.788	24.9809
rs9313297	G	A	G	A	0.0991772	-0.002945	0.172813	0.200496	FALSE	FALSE	FALSE	ieu-a-7	5	165405228	0.0115352	184305	0.798487	Coronary heart disease || id:ieu-a-7	Coronary heart disease	Coronary heart disease || ||	TRUE	igd	5	165978223	0.0219344	6.13931e-06	GCST90199633	Suberate (C8-DC) levels	6902	2	TRUE			0.00295419	6902	3.53661e-07	184305	TRUE	1.14289e-05	0.00281212	19.4583	29.788	20.4443
rs9406110	A	G	A	G	-0.0894199	0.004003	0.229681	0.232214	FALSE	FALSE	FALSE	ieu-a-7	6	8237195	0.0110507	184305	0.717173	Coronary heart disease || id:ieu-a-7	Coronary heart disease	Coronary heart disease || ||	TRUE	igd	6	8236962	0.0200898	8.54658e-06	GCST90199633	Suberate (C8-DC) levels	6902	2	TRUE			0.00286301	6902	7.11965e-07	184305	TRUE	1.71759e-05	0.0028294	19.5782	29.788	19.8115
rs1040519	G	A	G	A	-0.0818991	0.005494	0.708369	0.684075	FALSE	FALSE	FALSE	ieu-a-7	6	9542566	0.0103783	184305	0.596546	Coronary heart disease || id:ieu-a-7	Coronary heart disease	Coronary heart disease || ||	TRUE	igd	6	9542333	0.0168315	1.13978e-06	GCST90199634	5-hydroxylysine levels	8128	2	TRUE			0.00290517	8128	1.52052e-06	184305	TRUE	3.30957e-06	0.00277129	22.5821	29.788	23.6762
rs10877499	C	T	C	T	0.085716	-0.017008	0.212153	0.183398	FALSE	FALSE	FALSE	ieu-a-7	12	61419283	0.0121511	184305	0.161601	Coronary heart disease || id:ieu-a-7	Coronary heart disease	Coronary heart disease || ||	TRUE	igd	12	61025502	0.0188366	5.35153e-06	GCST90199634	5-hydroxylysine levels	8128	2	TRUE			0.00254177	8128	1.06301e-05	184305	TRUE	3.13246e-05	0.00245609	20.0074	29.788	20.7071
rs113983401	C	G	C	G	0.161297	-0.057647	0.0498823	0.043619	FALSE	TRUE	FALSE	ieu-a-7	16	87671572	0.0250224	184305	0.0212329	Coronary heart disease || id:ieu-a-7	Coronary heart disease	Coronary heart disease || ||	TRUE	igd	16	87637966	0.0354213	5.27173e-06	GCST90199634	5-hydroxylysine levels	8128	2	TRUE			0.00254531	8128	2.87972e-05	184305	TRUE	6.86441e-05	0.00246608	20.0889	29.788	20.7359
rs117462872	G	A	G	A	0.286413	0.024173	0.014046	0.015112	FALSE	FALSE	FALSE	ieu-a-7	8	143038991	0.0524097	184305	0.644632	Coronary heart disease || id:ieu-a-7	Coronary heart disease	Coronary heart disease || ||	TRUE	igd	8	141957630	0.0645828	9.21479e-06	GCST90199634	5-hydroxylysine levels	8128	2	TRUE			0.00241449	8128	1.15426e-06	184305	TRUE	2.20168e-05	0.00227209	18.505	29.788	19.6676
rs12499749	A	G	A	G	0.176873	-0.015028	0.0455162	0.046751	FALSE	FALSE	FALSE	ieu-a-7	4	30327380	0.0219645	184305	0.493853	Coronary heart disease || id:ieu-a-7	Coronary heart disease	Coronary heart disease || ||	TRUE	igd	4	30325758	0.0364889	1.25139e-06	GCST90199634	5-hydroxylysine levels	8128	2	TRUE			0.00288317	8128	2.53996e-06	184305	TRUE	4.21065e-06	0.00271824	22.1486	29.788	23.4964
rs12901358	C	T	C	T	0.070543	-0.005191	0.387751	0.399674	FALSE	FALSE	FALSE	ieu-a-7	15	99173481	0.0094224	184305	0.581687	Coronary heart disease || id:ieu-a-7	Coronary heart disease	Coronary heart disease || ||	TRUE	igd	15	98630252	0.0157671	7.67443e-06	GCST90199634	5-hydroxylysine levels	8128	2	TRUE			0.0024573	8128	1.64682e-06	184305	TRUE	2.01413e-05	0.00236276	19.2452	29.788	20.0172
rs1330804	A	G	A	G	-0.0735292	0.003199	0.405292	0.399715	FALSE	FALSE	FALSE	ieu-a-7	6	113560198	0.0097559	184305	0.742983	Coronary heart disease || id:ieu-a-7	Coronary heart disease	Coronary heart disease || ||	TRUE	igd	6	113238996	0.0164301	7.63159e-06	GCST90199634	5-hydroxylysine levels	8128	2	TRUE			0.00245863	8128	5.83393e-07	184305	TRUE	1.63013e-05	0.00260628	21.234	29.788	20.0281
rs140233308	T	G	T	G	0.320974	-0.135421	0.0116409	0.009536	FALSE	FALSE	FALSE	ieu-a-7	9	84425633	0.0775288	184305	0.0806863	Coronary heart disease || id:ieu-a-7	Coronary heart disease	Coronary heart disease || ||	TRUE	igd	9	81810718	0.0719087	8.05839e-06	GCST90199634	5-hydroxylysine levels	8128	2	TRUE			0.00244589	8128	1.65541e-05	184305	TRUE	6.1389e-05	0.00237067	19.3098	29.788	19.924
rs144429282	T	C	T	C	0.387083	-0.03775	0.0119106	0.016258	FALSE	FALSE	FALSE	ieu-a-7	3	30138454	0.0397513	184305	0.342287	Coronary heart disease || id:ieu-a-7	Coronary heart disease	Coronary heart disease || ||	TRUE	igd	3	30096963	0.0705729	4.13767e-08	GCST90199634	5-hydroxylysine levels	8128	2	TRUE			0.00368851	8128	4.89324e-06	184305	TRUE	2.3529e-07	0.0035267	28.7594	29.788	30.0838
rs1502069	T	C	T	C	-0.0811985	0.007826	0.764257	0.719849	FALSE	FALSE	FALSE	ieu-a-7	13	87110325	0.0104782	184305	0.455135	Coronary heart disease || id:ieu-a-7	Coronary heart disease	Coronary heart disease || ||	TRUE	igd	13	86458070	0.0181157	7.38717e-06	GCST90199634	5-hydroxylysine levels	8128	2	TRUE			0.00246625	8128	3.02672e-06	184305	TRUE	2.32633e-05	0.00237577	19.3515	29.788	20.0903
rs17533872	T	C	T	C	0.0752854	1.8e-05	0.424131	0.392765	FALSE	FALSE	FALSE	ieu-a-7	13	42215563	0.0097081	184305	0.998521	Coronary heart disease || id:ieu-a-7	Coronary heart disease	Coronary heart disease || ||	TRUE	igd	13	41641427	0.0158196	1.94553e-06	GCST90199634	5-hydroxylysine levels	8128	2	TRUE			0.00277936	8128	1.86528e-11	184305	TRUE	3.24591e-06	0.0027687	22.5609	29.788	22.648
rs3819547	C	G	C	G	-0.124927	0.02259	0.0878938	0.083903	FALSE	TRUE	FALSE	ieu-a-7	14	72931753	0.0172458	184305	0.190234	Coronary heart disease || id:ieu-a-7	Coronary heart disease	Coronary heart disease || ||	TRUE	igd	14	72465045	0.0272675	4.61627e-06	GCST90199634	5-hydroxylysine levels	8128	2	TRUE			0.00257647	8128	9.30956e-06	184305	TRUE	2.52668e-05	0.00250234	20.385	29.788	20.9905
rs3885951	G	A	G	A	0.578606	0.004749	0.0990508	0.086289	FALSE	FALSE	FALSE	ieu-a-7	15	78825917	0.0181539	184305	0.793632	Coronary heart disease || id:ieu-a-7	Coronary heart disease	Coronary heart disease || ||	TRUE	igd	15	78533575	0.0249628	7.46543e-119	GCST90199634	5-hydroxylysine levels	8128	2	TRUE			0.0620152	8128	3.71306e-07	184305	TRUE	5.3683e-111	0.0597522	516.403	29.788	537.254
rs41322846	C	G	C	G	0.113555	0.032008	0.0998263	0.097695	FALSE	TRUE	FALSE	ieu-a-7	12	96904105	0.0165907	184305	0.053697	Coronary heart disease || id:ieu-a-7	Coronary heart disease	Coronary heart disease || ||	TRUE	igd	12	96510327	0.0256097	9.24784e-06	GCST90199634	5-hydroxylysine levels	8128	2	TRUE			0.00241367	8128	2.01951e-05	184305	TRUE	8.1145e-05	0.00231747	18.8755	29.788	19.6609
rs55700529	A	G	A	G	0.292762	0.062265	0.0170546	0.050396	FALSE	FALSE	FALSE	ieu-a-7	1	18177914	0.0286343	184305	0.0296681	Coronary heart disease || id:ieu-a-7	Coronary heart disease	Coronary heart disease || ||	TRUE	igd	1	17851418	0.0593343	8.05186e-07	GCST90199634	5-hydroxylysine levels	8128	2	TRUE			0.00298704	8128	2.5655e-05	184305	TRUE	1.19065e-05	0.00287363	23.4184	29.788	24.3454
rs58374597	A	T	A	T	0.610277	-0.00759	0.0158799	0.033145	FALSE	TRUE	FALSE	ieu-a-7	15	78709933	0.0346849	184305	0.826784	Coronary heart disease || id:ieu-a-7	Coronary heart disease	Coronary heart disease || ||	TRUE	igd	15	78417591	0.0609732	1.39229e-23	GCST90199634	5-hydroxylysine levels	8128	2	TRUE			0.0121781	8128	2.59819e-07	184305	TRUE	2.25103e-22	0.0116407	95.7066	29.788	100.179
rs6495304	A	G	A	G	0.266767	0.004776	0.973048	0.912225	FALSE	FALSE	FALSE	ieu-a-7	15	78800416	0.0258817	184305	0.853596	Coronary heart disease || id:ieu-a-7	Coronary heart disease	Coronary heart disease || ||	TRUE	igd	15	78508074	0.0475445	2.01281e-08	GCST90199634	5-hydroxylysine levels	8128	2	TRUE			0.00385929	8128	1.84761e-07	184305	TRUE	5.0551e-08	0.00373267	30.4453	29.788	31.4821
rs661331	T	A	T	A	0.112287	-0.015927	0.103335	0.119256	FALSE	TRUE	FALSE	ieu-a-7	13	30508112	0.0147397	184305	0.279897	Coronary heart disease || id:ieu-a-7	Coronary heart disease	Coronary heart disease || ||	TRUE	igd	13	29933975	0.025189	8.28197e-06	GCST90199634	5-hydroxylysine levels	8128	2	TRUE			0.00243949	8128	6.33513e-06	184305	TRUE	3.49474e-05	0.0023365	19.0309	29.788	19.8718
rs73429419	T	C	T	C	-0.0978899	0.013641	0.150779	0.169096	FALSE	FALSE	FALSE	ieu-a-7	8	139384849	0.0121413	184305	0.261218	Coronary heart disease || id:ieu-a-7	Coronary heart disease	Coronary heart disease || ||	TRUE	igd	8	138372606	0.0214524	5.03982e-06	GCST90199634	5-hydroxylysine levels	8128	2	TRUE			0.00255585	8128	6.84899e-06	184305	TRUE	2.30901e-05	0.00245396	19.9899	29.788	20.8221
rs74582811	G	A	G	A	0.227003	0.028758	0.0289046	0.059076	FALSE	FALSE	FALSE	ieu-a-7	15	79258938	0.0273145	184305	0.292411	Coronary heart disease || id:ieu-a-7	Coronary heart disease	Coronary heart disease || ||	TRUE	igd	15	78966596	0.0458676	7.45581e-07	GCST90199634	5-hydroxylysine levels	8128	2	TRUE			0.00300516	8128	6.01445e-06	184305	TRUE	3.75665e-06	0.00289282	23.5753	29.788	24.4935
rs76751577	A	G	A	G	0.322064	-0.0197	0.0116681	0.009696	FALSE	FALSE	FALSE	ieu-a-7	1	234443838	0.0542194	184305	0.716351	Coronary heart disease || id:ieu-a-7	Coronary heart disease	Coronary heart disease || ||	TRUE	igd	1	234308092	0.0713328	6.333e-06	GCST90199634	5-hydroxylysine levels	8128	2	TRUE			0.00250231	8128	7.16292e-07	184305	TRUE	1.41304e-05	0.00239231	19.4865	29.788	20.3848
rs78818599	G	T	G	T	-0.215533	0.036975	0.0250279	0.029218	FALSE	FALSE	FALSE	ieu-a-7	2	180740586	0.0322483	184305	0.251559	Coronary heart disease || id:ieu-a-7	Coronary heart disease	Coronary heart disease || ||	TRUE	igd	2	179875859	0.0487937	9.99777e-06	GCST90199634	5-hydroxylysine levels	8128	2	TRUE			0.00239542	8128	7.13292e-06	184305	TRUE	4.40062e-05	0.00226712	18.4645	29.788	19.5119
rs9341222	C	T	C	T	0.230094	-0.044675	0.0234238	0.027636	FALSE	FALSE	FALSE	ieu-a-7	2	217529410	0.050651	184305	0.377768	Coronary heart disease || id:ieu-a-7	Coronary heart disease	Coronary heart disease || ||	TRUE	igd	2	216664687	0.0513898	7.55513e-06	GCST90199634	5-hydroxylysine levels	8128	2	TRUE			0.00246099	8128	4.22103e-06	184305	TRUE	2.68606e-05	0.00242217	19.7303	29.788	20.0473
rs9559451	C	T	C	T	-0.0752947	0.003156	0.664775	0.686476	FALSE	FALSE	FALSE	ieu-a-7	13	109625863	0.0104511	184305	0.762669	Coronary heart disease || id:ieu-a-7	Coronary heart disease	Coronary heart disease || ||	TRUE	igd	13	108973515	0.0165065	5.07846e-06	GCST90199634	5-hydroxylysine levels	8128	2	TRUE			0.00255406	8128	4.94786e-07	184305	TRUE	1.08277e-05	0.00252679	20.5847	29.788	20.8074
rs999856	A	G	A	G	-0.215444	-0.007742	0.0257376	0.056592	FALSE	FALSE	FALSE	ieu-a-7	10	14061696	0.0193097	184305	0.688465	Coronary heart disease || id:ieu-a-7	Coronary heart disease	Coronary heart disease || ||	TRUE	igd	10	14019697	0.0485076	8.93524e-06	GCST90199634	5-hydroxylysine levels	8128	2	TRUE			0.00242169	8128	8.72213e-07	184305	TRUE	2.0237e-05	0.00232778	18.9597	29.788	19.7265
rs112264683	C	T	C	T	0.368503	0.020432	0.00914634	0.010244	FALSE	FALSE	FALSE	ieu-a-7	18	1098669	0.0595346	184305	0.731451	Coronary heart disease || id:ieu-a-7	Coronary heart disease	Coronary heart disease || ||	TRUE	igd	18	1098668	0.0824753	7.89377e-06	GCST90199635	3-phenylpropionate hydrocinnamate levels	7925	2	TRUE			0.00251334	7925	6.39073e-07	184305	TRUE	1.68333e-05	0.00246132	19.5492	29.788	19.9634
rs112307471	A	G	A	G	-0.238964	0.008416	0.0250225	0.021239	FALSE	FALSE	FALSE	ieu-a-7	1	204423195	0.043223	184305	0.845619	Coronary heart disease || id:ieu-a-7	Coronary heart disease	Coronary heart disease || ||	TRUE	igd	1	204454067	0.0506661	2.40006e-06	GCST90199635	3-phenylpropionate hydrocinnamate levels	7925	2	TRUE			0.00279977	7925	2.05707e-07	184305	TRUE	4.73363e-06	0.00278625	22.1371	29.788	22.2449
rs13283163	A	G	A	G	0.170526	-0.043991	0.0526149	0.045773	FALSE	FALSE	FALSE	ieu-a-7	9	3389660	0.0230563	184305	0.0563936	Coronary heart disease || id:ieu-a-7	Coronary heart disease	Coronary heart disease || ||	TRUE	igd	9	3389660	0.0347529	9.25742e-07	GCST90199635	3-phenylpropionate hydrocinnamate levels	7925	2	TRUE			0.00302964	7925	1.97518e-05	184305	TRUE	1.0121e-05	0.00289899	23.0355	29.788	24.0768
rs141685561	T	C	T	C	-0.143423	0.001546	0.0739347	0.076293	FALSE	FALSE	FALSE	ieu-a-7	11	23913166	0.0198289	184305	0.937854	Coronary heart disease || id:ieu-a-7	Coronary heart disease	Coronary heart disease || ||	TRUE	igd	11	23891620	0.0298661	1.56938e-06	GCST90199635	3-phenylpropionate hydrocinnamate levels	7925	2	TRUE			0.00290221	7925	3.29829e-08	184305	TRUE	2.81602e-06	0.00281681	22.3806	29.788	23.0611
rs143985394	G	A	G	A	-0.240823	0.036858	0.0216392	0.015406	FALSE	FALSE	FALSE	ieu-a-7	19	14949367	0.0505738	184305	0.466127	Coronary heart disease || id:ieu-a-7	Coronary heart disease	Coronary heart disease || ||	TRUE	igd	19	14838555	0.0541185	8.59042e-06	GCST90199635	3-phenylpropionate hydrocinnamate levels	7925	2	TRUE			0.00249305	7925	2.8819e-06	184305	TRUE	2.58531e-05	0.00245565	19.504	29.788	19.8018
rs145409686	C	T	C	T	-0.550427	0.046374	0.0041228	0.018472	FALSE	FALSE	FALSE	ieu-a-7	2	28551449	0.0431263	184305	0.282238	Coronary heart disease || id:ieu-a-7	Coronary heart disease	Coronary heart disease || ||	TRUE	igd	2	28328582	0.120275	4.73054e-06	GCST90199635	3-phenylpropionate hydrocinnamate levels	7925	2	TRUE			0.00263641	7925	6.27378e-06	184305	TRUE	2.03915e-05	0.00248787	19.7605	29.788	20.9435
rs146175767	T	C	T	C	-0.121342	0.004089	0.0945706	0.097245	FALSE	FALSE	FALSE	ieu-a-7	4	86994494	0.0156511	184305	0.793893	Coronary heart disease || id:ieu-a-7	Coronary heart disease	Coronary heart disease || ||	TRUE	igd	4	86073341	0.0264241	4.38776e-06	GCST90199635	3-phenylpropionate hydrocinnamate levels	7925	2	TRUE			0.00265447	7925	3.7035e-07	184305	TRUE	8.94747e-06	0.00252152	20.0285	29.788	21.0873
rs147941428	G	A	G	A	-0.340237	0.014191	0.0130043	0.020946	FALSE	FALSE	FALSE	ieu-a-7	7	5805658	0.0424278	184305	0.738021	Coronary heart disease || id:ieu-a-7	Coronary heart disease	Coronary heart disease || ||	TRUE	igd	7	5766027	0.0690333	8.28252e-07	GCST90199635	3-phenylpropionate hydrocinnamate levels	7925	2	TRUE			0.00305652	7925	6.07005e-07	184305	TRUE	1.98155e-06	0.00297163	23.6144	29.788	24.291
rs148153141	G	A	G	A	-0.27871	-0.012197	0.0199163	0.010977	FALSE	FALSE	FALSE	ieu-a-7	16	20437911	0.0665313	184305	0.854541	Coronary heart disease || id:ieu-a-7	Coronary heart disease	Coronary heart disease || ||	TRUE	igd	16	20426589	0.0551887	4.41503e-07	GCST90199635	3-phenylpropionate hydrocinnamate levels	7925	2	TRUE			0.00320863	7925	1.82357e-07	184305	TRUE	9.35266e-07	0.00303254	24.0999	29.788	25.5038
rs17767728	C	T	C	T	0.0909404	-0.003214	0.194635	0.180963	FALSE	FALSE	FALSE	ieu-a-7	2	134455375	0.0122185	184305	0.792516	Coronary heart disease || id:ieu-a-7	Coronary heart disease	Coronary heart disease || ||	TRUE	igd	2	133697804	0.0194777	3.02745e-06	GCST90199635	3-phenylpropionate hydrocinnamate levels	7925	2	TRUE			0.00274382	7925	3.75425e-07	184305	TRUE	6.30347e-06	0.00259273	20.5956	29.788	21.7991
rs187719086	T	C	T	C	-0.29344	-0.024943	0.0137168	0.018493	FALSE	FALSE	FALSE	ieu-a-7	4	46003745	0.0365185	184305	0.494592	Coronary heart disease || id:ieu-a-7	Coronary heart disease	Coronary heart disease || ||	TRUE	igd	4	46001728	0.0662578	9.47782e-06	GCST90199635	3-phenylpropionate hydrocinnamate levels	7925	2	TRUE			0.00246946	7925	2.53127e-06	184305	TRUE	2.71884e-05	0.00232982	18.5023	29.788	19.6139
rs191187061	T	C	T	C	-0.304207	0.07039	0.0178844	0.015941	FALSE	FALSE	FALSE	ieu-a-7	1	156497048	0.0572827	184305	0.21914	Coronary heart disease || id:ieu-a-7	Coronary heart disease	Coronary heart disease || ||	TRUE	igd	1	156527256	0.0586874	2.1775e-07	GCST90199635	3-phenylpropionate hydrocinnamate levels	7925	2	TRUE			0.00337978	7925	8.19293e-06	184305	TRUE	1.41461e-06	0.00325091	25.841	29.788	26.8688
rs2186671	G	A	G	A	-0.0760014	-0.000376	0.448059	0.451099	FALSE	FALSE	FALSE	ieu-a-7	11	109278427	0.0094973	184305	0.96842	Coronary heart disease || id:ieu-a-7	Coronary heart disease	Coronary heart disease || ||	TRUE	igd	11	109407701	0.016068	2.24527e-06	GCST90199635	3-phenylpropionate hydrocinnamate levels	7925	2	TRUE			0.00281582	7925	8.50439e-09	184305	TRUE	3.8192e-06	0.00285694	22.7004	29.788	22.3728
rs4812445	G	A	G	A	-0.0994662	-0.023666	0.253933	0.245645	FALSE	FALSE	FALSE	ieu-a-7	20	39238736	0.0119436	184305	0.0475379	Coronary heart disease || id:ieu-a-7	Coronary heart disease	Coronary heart disease || ||	TRUE	igd	20	40610096	0.0192108	2.24745e-07	GCST90199635	3-phenylpropionate hydrocinnamate levels	7925	2	TRUE			0.00337212	7925	2.13028e-05	184305	TRUE	3.09554e-06	0.00374868	29.8125	29.788	26.8077
rs62058082	T	C	T	C	-0.105084	-0.009933	0.168677	0.171328	FALSE	FALSE	FALSE	ieu-a-7	17	12782669	0.0151764	184305	0.512787	Coronary heart disease || id:ieu-a-7	Coronary heart disease	Coronary heart disease || ||	TRUE	igd	17	12879352	0.0220071	1.7969e-06	GCST90199635	3-phenylpropionate hydrocinnamate levels	7925	2	TRUE			0.00286952	7925	2.32429e-06	184305	TRUE	5.62086e-06	0.00309691	24.6131	29.788	22.8007
rs73478203	G	A	G	A	0.0825426	0.002826	0.230375	0.197556	FALSE	FALSE	FALSE	ieu-a-7	6	80327007	0.0120251	184305	0.814202	Coronary heart disease || id:ieu-a-7	Coronary heart disease	Coronary heart disease || ||	TRUE	igd	6	79617290	0.0184542	7.71921e-06	GCST90199635	3-phenylpropionate hydrocinnamate levels	7925	2	TRUE			0.00251873	7925	2.99664e-07	184305	TRUE	1.49196e-05	0.00241602	19.1885	29.788	20.0063
rs74432647	T	C	T	C	0.150663	-0.023489	0.0724275	0.073691	FALSE	FALSE	FALSE	ieu-a-7	2	225722826	0.0196812	184305	0.232683	Coronary heart disease || id:ieu-a-7	Coronary heart disease	Coronary heart disease || ||	TRUE	igd	2	224858109	0.0304065	7.23414e-07	GCST90199635	3-phenylpropionate hydrocinnamate levels	7925	2	TRUE			0.00308921	7925	7.72841e-06	184305	TRUE	4.09127e-06	0.00304996	24.2388	29.788	24.5516
rs75223710	T	C	T	C	-0.219819	-0.007712	0.0257673	0.026149	FALSE	FALSE	FALSE	ieu-a-7	1	246287351	0.0334183	184305	0.817492	Coronary heart disease || id:ieu-a-7	Coronary heart disease	Coronary heart disease || ||	TRUE	igd	1	246124049	0.0494675	8.84241e-06	GCST90199635	3-phenylpropionate hydrocinnamate levels	7925	2	TRUE			0.00248611	7925	2.88957e-07	184305	TRUE	1.69075e-05	0.00242601	19.268	29.788	19.7465
rs78674307	G	T	G	T	-0.150826	-0.00254	0.0557029	0.045656	FALSE	FALSE	FALSE	ieu-a-7	3	43567237	0.0269223	184305	0.924835	Coronary heart disease || id:ieu-a-7	Coronary heart disease	Coronary heart disease || ||	TRUE	igd	3	43525745	0.0340435	9.40626e-06	GCST90199635	3-phenylpropionate hydrocinnamate levels	7925	2	TRUE			0.00247127	7925	4.82959e-08	184305	TRUE	1.58221e-05	0.00239314	19.0064	29.788	19.6284
rs79970883	T	C	T	C	-0.195098	-0.017058	0.042993	0.042005	FALSE	FALSE	FALSE	ieu-a-7	13	84957094	0.0272764	184305	0.531725	Coronary heart disease || id:ieu-a-7	Coronary heart disease	Coronary heart disease || ||	TRUE	igd	13	84382959	0.03888	5.2225e-07	GCST90199635	3-phenylpropionate hydrocinnamate levels	7925	2	TRUE			0.003168	7925	2.12202e-06	184305	TRUE	1.72184e-06	0.00313219	24.8943	29.788	25.1798
rs9510299	C	G	C	G	-0.0736478	0.014258	0.359614	0.342646	FALSE	TRUE	FALSE	ieu-a-7	13	23288633	0.0099786	184305	0.153043	Coronary heart disease || id:ieu-a-7	Coronary heart disease	Coronary heart disease || ||	TRUE	igd	13	22714494	0.01656	8.69424e-06	GCST90199635	3-phenylpropionate hydrocinnamate levels	7925	2	TRUE			0.00249016	7925	1.10775e-05	184305	TRUE	4.85351e-05	0.0024982	19.8428	29.788	19.7788
rs10216901	T	C	T	C	-0.092585	0.014864	0.372432	0.415387	FALSE	FALSE	FALSE	ieu-a-7	8	39804593	0.0093702	184305	0.112671	Coronary heart disease || id:ieu-a-7	Coronary heart disease	Coronary heart disease || ||	TRUE	igd	8	39947074	0.0153069	1.4614e-09	GCST90199636	Kynurenine levels	8244	2	TRUE			0.00441927	8244	1.36532e-05	184305	TRUE	2.33949e-08	0.004007	33.1585	29.788	36.5853
rs10516101	T	C	T	C	-0.123617	-0.00256	0.0812102	0.082672	FALSE	FALSE	FALSE	ieu-a-7	5	173066731	0.0169829	184305	0.880181	Coronary heart disease || id:ieu-a-7	Coronary heart disease	Coronary heart disease || ||	TRUE	igd	5	173639728	0.0269608	4.53863e-06	GCST90199636	Kynurenine levels	8244	2	TRUE			0.0025442	8244	1.23289e-07	184305	TRUE	8.48736e-06	0.00228041	18.8381	29.788	21.0228
rs10883982	C	A	C	A	-0.0787528	0.020682	0.22765	0.215229	FALSE	FALSE	FALSE	ieu-a-7	10	105974333	0.0112104	184305	0.0650534	Coronary heart disease || id:ieu-a-7	Coronary heart disease	Coronary heart disease || ||	TRUE	igd	10	104214575	0.0174501	6.39098e-06	GCST90199636	Kynurenine levels	8244	2	TRUE			0.00246508	8244	1.84673e-05	184305	TRUE	5.5391e-05	0.00218094	18.0146	29.788	20.3674
rs11055387	C	G	C	G	-0.145349	-0.014458	0.0566212	0.058321	FALSE	TRUE	FALSE	ieu-a-7	12	13519996	0.0199506	184305	0.468642	Coronary heart disease || id:ieu-a-7	Coronary heart disease	Coronary heart disease || ||	TRUE	igd	12	13367062	0.0321909	6.32541e-06	GCST90199636	Kynurenine levels	8244	2	TRUE			0.00246747	8244	2.84951e-06	184305	TRUE	1.99435e-05	0.00225694	18.6437	29.788	20.3872
rs116794445	A	G	A	G	-0.322608	-0.031185	0.0110504	0.01081	FALSE	FALSE	FALSE	ieu-a-7	5	13502023	0.0621688	184305	0.615937	Coronary heart disease || id:ieu-a-7	Coronary heart disease	Coronary heart disease || ||	TRUE	igd	5	13501913	0.0709539	5.44861e-06	GCST90199636	Kynurenine levels	8244	2	TRUE			0.00250194	8244	1.36525e-06	184305	TRUE	1.40898e-05	0.00227474	18.7912	29.788	20.6727
rs17240098	T	G	T	G	0.148969	0.010152	0.0553582	0.051969	FALSE	FALSE	FALSE	ieu-a-7	6	52135722	0.0240882	184305	0.673426	Coronary heart disease || id:ieu-a-7	Coronary heart disease	Coronary heart disease || ||	TRUE	igd	6	52270924	0.0327399	5.36261e-06	GCST90199636	Kynurenine levels	8244	2	TRUE			0.00250562	8244	9.63744e-07	184305	TRUE	1.28694e-05	0.00232098	19.174	29.788	20.7032
rs17287314	A	T	A	T	-0.0741746	-0.004961	0.297359	0.276713	FALSE	TRUE	FALSE	ieu-a-7	7	105606500	0.0106911	184305	0.642627	Coronary heart disease || id:ieu-a-7	Coronary heart disease	Coronary heart disease || ||	TRUE	igd	7	105966054	0.0165025	6.96562e-06	GCST90199636	Kynurenine levels	8244	2	TRUE			0.0024452	8244	1.16832e-06	184305	TRUE	1.71225e-05	0.00229908	18.9927	29.788	20.2028
rs34519073	A	G	A	G	0.071803	0.012864	0.311375	0.276948	FALSE	FALSE	FALSE	ieu-a-7	22	49539331	0.0108758	184305	0.236885	Coronary heart disease || id:ieu-a-7	Coronary heart disease	Coronary heart disease || ||	TRUE	igd	22	49143607	0.0160729	7.92019e-06	GCST90199636	Kynurenine levels	8244	2	TRUE			0.00241554	8244	7.59091e-06	184305	TRUE	3.72422e-05	0.00221096	18.2631	29.788	19.9571
rs35223481	A	T	A	T	-0.105966	0.004229	0.112435	0.101095	FALSE	TRUE	FALSE	ieu-a-7	14	95012757	0.0158097	184305	0.789089	Coronary heart disease || id:ieu-a-7	Coronary heart disease	Coronary heart disease || ||	TRUE	igd	14	94546420	0.0235442	6.77162e-06	GCST90199636	Kynurenine levels	8244	2	TRUE			0.0024517	8244	3.88236e-07	184305	TRUE	1.38676e-05	0.00224112	18.5128	29.788	20.2565
rs4843270	A	C	A	C	0.205627	0.023715	0.265349	0.314714	FALSE	FALSE	FALSE	ieu-a-7	16	87878072	0.0105923	184305	0.0251629	Coronary heart disease || id:ieu-a-7	Coronary heart disease	Coronary heart disease || ||	TRUE	igd	16	87844466	0.0165261	1.53431e-35	GCST90199636	Kynurenine levels	8244	2	TRUE			0.0184376	8244	2.7197e-05	184305	TRUE	1.77921e-31	0.016485	138.147	29.788	154.817
rs55709807	A	G	A	G	0.178987	0.029861	0.0356445	0.038097	FALSE	FALSE	FALSE	ieu-a-7	2	138718539	0.0276795	184305	0.28067	Coronary heart disease || id:ieu-a-7	Coronary heart disease	Coronary heart disease || ||	TRUE	igd	2	137960969	0.0395664	6.07661e-06	GCST90199636	Kynurenine levels	8244	2	TRUE			0.00247674	8244	6.31476e-06	184305	TRUE	2.66257e-05	0.00220243	18.1925	29.788	20.464
rs55879891	A	C	A	C	0.101148	0.007852	0.137167	0.154486	FALSE	FALSE	FALSE	ieu-a-7	8	128368933	0.0124194	184305	0.527232	Coronary heart disease || id:ieu-a-7	Coronary heart disease	Coronary heart disease || ||	TRUE	igd	8	127356687	0.0215999	2.83001e-06	GCST90199636	Kynurenine levels	8244	2	TRUE			0.00265353	8244	2.16883e-06	184305	TRUE	8.65189e-06	0.0024217	20.0081	29.788	21.9286
rs61825638	T	C	T	C	0.130031	-0.002844	0.246402	0.242815	FALSE	FALSE	FALSE	ieu-a-7	1	241713402	0.012691	184305	0.822683	Coronary heart disease || id:ieu-a-7	Coronary heart disease	Coronary heart disease || ||	TRUE	igd	1	241550102	0.0171027	2.89497e-14	GCST90199636	Kynurenine levels	8244	2	TRUE			0.00696461	8244	2.7248e-07	184305	TRUE	1.54778e-13	0.00627925	52.0806	29.788	57.8049
rs6440053	A	T	A	T	0.0964971	0.024252	0.842367	0.819607	FALSE	TRUE	FALSE	ieu-a-7	3	141659512	0.0129245	184305	0.0605954	Coronary heart disease || id:ieu-a-7	Coronary heart disease	Coronary heart disease || ||	TRUE	igd	3	141940670	0.0204102	2.26858e-06	GCST90199636	Kynurenine levels	8244	2	TRUE			0.00270474	8244	1.91041e-05	184305	TRUE	2.28521e-05	0.0024729	20.4322	29.788	22.3529
rs6481144	C	A	C	A	-0.21192	0.003204	0.971072	0.920739	FALSE	FALSE	FALSE	ieu-a-7	10	56900393	0.0215996	184305	0.882077	Coronary heart disease || id:ieu-a-7	Coronary heart disease	Coronary heart disease || ||	TRUE	igd	10	55140633	0.0450635	2.56748e-06	GCST90199636	Kynurenine levels	8244	2	TRUE			0.00267607	8244	1.19388e-07	184305	TRUE	4.92553e-06	0.00252315	20.8484	29.788	22.1154
rs6540080	A	G	A	G	-0.107927	-0.006566	0.287217	0.284363	FALSE	FALSE	FALSE	ieu-a-7	16	87818569	0.0116101	184305	0.571706	Coronary heart disease || id:ieu-a-7	Coronary heart disease	Coronary heart disease || ||	TRUE	igd	16	87784963	0.0164258	5.01151e-11	GCST90199636	Kynurenine levels	8244	2	TRUE			0.00521081	8244	1.73539e-06	184305	TRUE	2.87381e-10	0.00476933	39.4972	29.788	43.1725
rs72761290	A	C	A	C	0.135722	-0.00854	0.0752681	0.07572	FALSE	FALSE	FALSE	ieu-a-7	9	133278880	0.0221068	184305	0.69927	Coronary heart disease || id:ieu-a-7	Coronary heart disease	Coronary heart disease || ||	TRUE	igd	9	130403493	0.0286233	2.11975e-06	GCST90199636	Kynurenine levels	8244	2	TRUE			0.00272048	8244	8.09713e-07	184305	TRUE	5.19462e-06	0.00256423	21.1887	29.788	22.4834
rs72789484	A	G	A	G	-0.144555	-0.07398	0.0546991	0.056534	FALSE	FALSE	FALSE	ieu-a-7	16	75820432	0.0265302	184305	0.00529493	Coronary heart disease || id:ieu-a-7	Coronary heart disease	Coronary heart disease || ||	TRUE	igd	16	75786534	0.0325854	9.15605e-06	GCST90199636	Kynurenine levels	8244	2	TRUE			0.00238205	8244	4.21888e-05	184305	TRUE	0.00016901	0.00216096	17.8492	29.788	19.6798
rs75973738	A	T	A	T	-0.194072	0.008654	0.0423521	0.054017	FALSE	TRUE	FALSE	ieu-a-7	14	85184931	0.0232018	184305	0.709158	Coronary heart disease || id:ieu-a-7	Coronary heart disease	Coronary heart disease || ||	TRUE	igd	14	84718587	0.0374159	2.13841e-07	GCST90199636	Kynurenine levels	8244	2	TRUE			0.00325361	8244	7.54845e-07	184305	TRUE	5.90064e-07	0.00305518	25.2579	29.788	26.9038
rs79435381	A	G	A	G	-0.166018	-0.016491	0.0418438	0.04303	FALSE	FALSE	FALSE	ieu-a-7	1	76308431	0.0228607	184305	0.470682	Coronary heart disease || id:ieu-a-7	Coronary heart disease	Coronary heart disease || ||	TRUE	igd	1	75842746	0.0368091	6.4752e-06	GCST90199636	Kynurenine levels	8244	2	TRUE			0.00246205	8244	2.82346e-06	184305	TRUE	2.03198e-05	0.00221008	18.2558	29.788	20.3423
rs9821445	C	T	C	T	0.0994985	0.015966	0.147783	0.143253	FALSE	FALSE	FALSE	ieu-a-7	3	183937619	0.0139163	184305	0.251263	Coronary heart disease || id:ieu-a-7	Coronary heart disease	Coronary heart disease || ||	TRUE	igd	3	184219831	0.0206581	1.46142e-06	GCST90199636	Kynurenine levels	8244	2	TRUE			0.00280672	8244	7.14182e-06	184305	TRUE	7.73497e-06	0.00249366	20.6041	29.788	23.1981
rs9909552	G	C	G	C	0.0692728	0.003842	0.37961	0.378946	FALSE	TRUE	FALSE	ieu-a-7	17	35191961	0.010664	184305	0.718639	Coronary heart disease || id:ieu-a-7	Coronary heart disease	Coronary heart disease || ||	TRUE	igd	17	36834695	0.0155536	8.43552e-06	GCST90199636	Kynurenine levels	8244	2	TRUE			0.00240097	8244	7.04274e-07	184305	TRUE	1.86131e-05	0.00226026	18.6712	29.788	19.8364
rs9933330	T	C	T	C	-0.103406	-0.016954	0.180459	0.166304	FALSE	FALSE	FALSE	ieu-a-7	16	20366810	0.0126758	184305	0.181056	Coronary heart disease || id:ieu-a-7	Coronary heart disease	Coronary heart disease || ||	TRUE	igd	16	20355488	0.0193124	8.58377e-08	GCST90199636	Kynurenine levels	8244	2	TRUE			0.0034664	8244	9.70637e-06	184305	TRUE	7.10442e-07	0.00316279	26.1504	29.788	28.6694
rs9988529	C	T	C	T	-0.180183	-0.010596	0.042129	0.07772	FALSE	FALSE	FALSE	ieu-a-7	1	63660366	0.0181224	184305	0.558756	Coronary heart disease || id:ieu-a-7	Coronary heart disease	Coronary heart disease || ||	TRUE	igd	1	63194695	0.036929	1.06523e-06	GCST90199636	Kynurenine levels	8244	2	TRUE			0.0028801	8244	1.85489e-06	184305	TRUE	3.31825e-06	0.00262027	21.653	29.788	23.8063
rs10168931	A	G	A	G	0.123014	0.026637	0.224014	0.208943	FALSE	FALSE	FALSE	ieu-a-7	2	73877219	0.0119979	184305	0.0264101	Coronary heart disease || id:ieu-a-7	Coronary heart disease	Coronary heart disease || ||	TRUE	igd	2	73650092	0.0183105	1.83992e-11	GCST90199637	N-acetylglutamate levels	7802	2	TRUE			0.00575318	7802	2.67434e-05	184305	TRUE	8.99183e-10	0.005261	41.2528	29.788	45.1345
rs10762589	T	C	T	C	-0.0883667	0.028084	0.752636	0.694338	FALSE	FALSE	FALSE	ieu-a-7	10	75989752	0.0101828	184305	0.00581581	Coronary heart disease || id:ieu-a-7	Coronary heart disease	Coronary heart disease || ||	TRUE	igd	10	74229994	0.017702	5.97844e-07	GCST90199637	N-acetylglutamate levels	7802	2	TRUE			0.00318458	7802	4.12699e-05	184305	TRUE	1.48496e-05	0.00290756	22.7451	29.788	24.9191
rs10854172	C	T	C	T	0.116341	-0.010781	0.187765	0.208297	FALSE	FALSE	FALSE	ieu-a-7	20	45227523	0.0120457	184305	0.370784	Coronary heart disease || id:ieu-a-7	Coronary heart disease	Coronary heart disease || ||	TRUE	igd	20	46598884	0.01969	3.44954e-09	GCST90199637	N-acetylglutamate levels	7802	2	TRUE			0.00445595	7802	4.3463e-06	184305	TRUE	2.1136e-08	0.0041285	32.3358	29.788	34.912
rs10872573	C	T	C	T	-0.0805091	0.00146	0.723072	0.670842	FALSE	FALSE	FALSE	ieu-a-7	6	100810622	0.01011	184305	0.885176	Coronary heart disease || id:ieu-a-7	Coronary heart disease	Coronary heart disease || ||	TRUE	igd	6	100362746	0.0174765	4.09071e-06	GCST90199637	N-acetylglutamate levels	7802	2	TRUE			0.00271335	7802	1.13154e-07	184305	TRUE	7.43657e-06	0.00259578	20.2998	29.788	21.2217
rs10957056	C	A	C	A	0.087937	-0.007956	0.191407	0.18781	FALSE	FALSE	FALSE	ieu-a-7	8	59400186	0.0119034	184305	0.503891	Coronary heart disease || id:ieu-a-7	Coronary heart disease	Coronary heart disease || ||	TRUE	igd	8	58487627	0.0197421	8.41709e-06	GCST90199637	N-acetylglutamate levels	7802	2	TRUE			0.00253722	7802	2.4239e-06	184305	TRUE	2.37741e-05	0.00239365	18.7153	29.788	19.8407
rs116233634	G	A	G	A	0.279475	0.054789	0.0158761	0.019781	FALSE	FALSE	FALSE	ieu-a-7	9	14712672	0.0337691	184305	0.104705	Coronary heart disease || id:ieu-a-7	Coronary heart disease	Coronary heart disease || ||	TRUE	igd	9	14712674	0.0616153	5.73854e-06	GCST90199637	N-acetylglutamate levels	7802	2	TRUE			0.00263069	7802	1.42827e-05	184305	TRUE	3.89479e-05	0.00244067	19.0838	29.788	20.5735
rs12070599	A	G	A	G	-0.0833283	0.004982	0.31028	0.285684	FALSE	FALSE	FALSE	ieu-a-7	1	166499803	0.0123075	184305	0.68563	Coronary heart disease || id:ieu-a-7	Coronary heart disease	Coronary heart disease || ||	TRUE	igd	1	166530566	0.0173446	1.55314e-06	GCST90199637	N-acetylglutamate levels	7802	2	TRUE			0.00295038	7802	8.89068e-07	184305	TRUE	3.80857e-06	0.00297195	23.2503	29.788	23.0811
rs12554315	A	T	A	T	0.155318	0.013381	0.0556449	0.061149	FALSE	TRUE	FALSE	ieu-a-7	9	26390173	0.0259219	184305	0.60571	Coronary heart disease || id:ieu-a-7	Coronary heart disease	Coronary heart disease || ||	TRUE	igd	9	26390175	0.0339765	4.84654e-06	GCST90199637	N-acetylglutamate levels	7802	2	TRUE			0.00267196	7802	1.44581e-06	184305	TRUE	1.23517e-05	0.00253533	19.8258	29.788	20.8971
rs148895950	G	T	G	T	-0.297994	0.010794	0.0133051	0.019087	FALSE	FALSE	FALSE	ieu-a-7	7	117749784	0.0419912	184305	0.797137	Coronary heart disease || id:ieu-a-7	Coronary heart disease	Coronary heart disease || ||	TRUE	igd	7	118109730	0.0670282	8.75659e-06	GCST90199637	N-acetylglutamate levels	7802	2	TRUE			0.00252759	7802	3.58522e-07	184305	TRUE	1.70252e-05	0.00233156	18.2286	29.788	19.7651
rs186654219	A	G	A	G	0.36491	0.072728	0.0103212	0.008577	FALSE	FALSE	FALSE	ieu-a-7	5	64115580	0.0659545	184305	0.270157	Coronary heart disease || id:ieu-a-7	Coronary heart disease	Coronary heart disease || ||	TRUE	igd	5	64819753	0.0767441	1.98548e-06	GCST90199637	N-acetylglutamate levels	7802	2	TRUE			0.00289021	7802	6.5975e-06	184305	TRUE	9.30843e-06	0.00272036	21.2767	29.788	22.609
rs187543759	C	T	C	T	-0.329606	-0.050085	0.0110081	0.010196	FALSE	FALSE	FALSE	ieu-a-7	6	78093328	0.0609044	184305	0.410875	Coronary heart disease || id:ieu-a-7	Coronary heart disease	Coronary heart disease || ||	TRUE	igd	6	77383611	0.0734255	7.15653e-06	GCST90199637	N-acetylglutamate levels	7802	2	TRUE			0.0025768	7802	3.66931e-06	184305	TRUE	2.34681e-05	0.00236551	18.4947	29.788	20.151
rs2265815	G	A	G	A	0.0912856	-0.002636	0.820119	0.744012	FALSE	FALSE	FALSE	ieu-a-7	9	130293591	0.0112126	184305	0.814136	Coronary heart disease || id:ieu-a-7	Coronary heart disease	Coronary heart disease || ||	TRUE	igd	9	127531312	0.0200603	5.35021e-06	GCST90199637	N-acetylglutamate levels	7802	2	TRUE			0.00264779	7802	2.99879e-07	184305	TRUE	1.04519e-05	0.00245865	19.2247	29.788	20.7076
rs2803552	C	T	C	T	-0.205145	-0.028828	0.96381	0.95081	FALSE	FALSE	FALSE	ieu-a-7	10	88303126	0.0268419	184305	0.282826	Coronary heart disease || id:ieu-a-7	Coronary heart disease	Coronary heart disease || ||	TRUE	igd	10	86543369	0.0419759	1.02278e-06	GCST90199637	N-acetylglutamate levels	7802	2	TRUE			0.00305281	7802	6.25846e-06	184305	TRUE	4.928e-06	0.00293584	22.967	29.788	23.8848
rs28690110	T	C	T	C	-0.0796679	-0.011462	0.256755	0.299098	FALSE	FALSE	FALSE	ieu-a-7	17	42067526	0.0102968	184305	0.26564	Coronary heart disease || id:ieu-a-7	Coronary heart disease	Coronary heart disease || ||	TRUE	igd	17	43990158	0.017735	7.05164e-06	GCST90199637	N-acetylglutamate levels	7802	2	TRUE			0.0025804	7802	6.72328e-06	184305	TRUE	2.99917e-05	0.00242241	18.9407	29.788	20.1792
rs4336667	A	G	A	G	-0.0726878	0.017909	0.567883	0.539985	FALSE	FALSE	FALSE	ieu-a-7	9	108740661	0.0093018	184305	0.0541889	Coronary heart disease || id:ieu-a-7	Coronary heart disease	Coronary heart disease || ||	TRUE	igd	9	105978380	0.0157023	3.67215e-06	GCST90199637	N-acetylglutamate levels	7802	2	TRUE			0.00273975	7802	2.01126e-05	184305	TRUE	3.41478e-05	0.00259306	20.2785	29.788	21.4287
rs60665648	C	T	C	T	-0.261085	-0.03459	0.0195022	0.023621	FALSE	FALSE	FALSE	ieu-a-7	13	42029998	0.0352888	184305	0.326989	Coronary heart disease || id:ieu-a-7	Coronary heart disease	Coronary heart disease || ||	TRUE	igd	13	41455862	0.0554528	2.49863e-06	GCST90199637	N-acetylglutamate levels	7802	2	TRUE			0.00283393	7802	5.21306e-06	184305	TRUE	1.02563e-05	0.0026069	20.387	29.788	22.1675
rs7154858	C	T	C	T	0.0944413	-0.014098	0.155615	0.198555	FALSE	FALSE	FALSE	ieu-a-7	14	70995884	0.0118274	184305	0.23327	Coronary heart disease || id:ieu-a-7	Coronary heart disease	Coronary heart disease || ||	TRUE	igd	14	70529167	0.0212157	8.52813e-06	GCST90199637	N-acetylglutamate levels	7802	2	TRUE			0.00253404	7802	7.70905e-06	184305	TRUE	3.82359e-05	0.00234394	18.3257	29.788	19.8157
rs76105072	C	T	C	T	0.178385	0.003359	0.0402336	0.034235	FALSE	FALSE	FALSE	ieu-a-7	4	158888768	0.0351889	184305	0.923952	Coronary heart disease || id:ieu-a-7	Coronary heart disease	Coronary heart disease || ||	TRUE	igd	4	157967616	0.0390113	4.81571e-06	GCST90199637	N-acetylglutamate levels	7802	2	TRUE			0.00267349	7802	4.94397e-08	184305	TRUE	8.29801e-06	0.00245754	19.2161	29.788	20.9091
rs79132971	A	C	A	C	0.132736	0.00113	0.0725952	0.051027	FALSE	FALSE	FALSE	ieu-a-7	2	3297034	0.024312	184305	0.962928	Coronary heart disease || id:ieu-a-7	Coronary heart disease	Coronary heart disease || ||	TRUE	igd	2	3293263	0.0296366	7.50724e-06	GCST90199637	N-acetylglutamate levels	7802	2	TRUE			0.00256514	7802	1.17215e-08	184305	TRUE	1.21208e-05	0.00237238	18.5486	29.788	20.0595
rs10521085	T	C	T	C	-0.113394	-0.005546	0.108586	0.113586	FALSE	FALSE	FALSE	ieu-a-7	16	7712321	0.0143878	184305	0.699892	Coronary heart disease || id:ieu-a-7	Coronary heart disease	Coronary heart disease || ||	TRUE	igd	16	7662319	0.0249262	5.38568e-06	GCST90199638	Glycerol 3-phosphate levels	8201	2	TRUE			0.00251775	8201	8.06191e-07	184305	TRUE	1.24487e-05	0.00248922	20.4601	29.788	20.6951
rs113971921	T	C	T	C	0.0971709	0.007384	0.166028	0.135545	FALSE	FALSE	FALSE	ieu-a-7	4	109666884	0.0158466	184305	0.641239	Coronary heart disease || id:ieu-a-7	Coronary heart disease	Coronary heart disease || ||	TRUE	igd	4	108745728	0.0213914	5.5584e-06	GCST90199638	Glycerol 3-phosphate levels	8201	2	TRUE			0.00251039	8201	1.17809e-06	184305	TRUE	1.38358e-05	0.00261478	21.4948	29.788	20.6345
rs11603769	C	G	C	G	0.229614	0.035914	0.0240741	0.016097	FALSE	TRUE	FALSE	ieu-a-7	11	98056280	0.0588013	184305	0.541352	Coronary heart disease || id:ieu-a-7	Coronary heart disease	Coronary heart disease || ||	TRUE	igd	11	98185552	0.0511828	7.25222e-06	GCST90199638	Glycerol 3-phosphate levels	8201	2	TRUE			0.00244863	8201	2.02405e-06	184305	TRUE	2.03071e-05	0.00247739	20.3625	29.788	20.1256
rs117110311	C	G	C	G	0.488462	0.024875	0.005377	0.013179	FALSE	TRUE	FALSE	ieu-a-7	11	107253990	0.0418717	184305	0.55246	Coronary heart disease || id:ieu-a-7	Coronary heart disease	Coronary heart disease || ||	TRUE	igd	11	107383264	0.106255	4.28443e-06	GCST90199638	Glycerol 3-phosphate levels	8201	2	TRUE			0.00257089	8201	1.91492e-06	184305	TRUE	1.22372e-05	0.00255206	20.9778	29.788	21.1331
rs118152300	T	G	T	G	0.167422	0.002259	0.0451781	0.04563	FALSE	FALSE	FALSE	ieu-a-7	10	122008534	0.0261782	184305	0.931233	Coronary heart disease || id:ieu-a-7	Coronary heart disease	Coronary heart disease || ||	TRUE	igd	10	120249022	0.0374675	7.87849e-06	GCST90199638	Glycerol 3-phosphate levels	8201	2	TRUE			0.0024294	8201	4.04036e-08	184305	TRUE	1.34638e-05	0.00241827	19.8755	29.788	19.9671
rs118174096	T	C	T	C	-0.281275	0.018212	0.0158449	0.014727	FALSE	FALSE	FALSE	ieu-a-7	6	112982824	0.058407	184305	0.755183	Coronary heart disease || id:ieu-a-7	Coronary heart disease	Coronary heart disease || ||	TRUE	igd	6	112661622	0.06139	4.6107e-06	GCST90199638	Glycerol 3-phosphate levels	8201	2	TRUE			0.00255385	8201	5.27537e-07	184305	TRUE	1.00257e-05	0.00246743	20.2805	29.788	20.9926
rs12770630	T	C	T	C	-0.115058	0.007812	0.12587	0.110115	FALSE	FALSE	FALSE	ieu-a-7	10	111536384	0.0169025	184305	0.643951	Coronary heart disease || id:ieu-a-7	Coronary heart disease	Coronary heart disease || ||	TRUE	igd	10	109776626	0.0235144	9.92606e-07	GCST90199638	Glycerol 3-phosphate levels	8201	2	TRUE			0.00291165	8201	1.15902e-06	184305	TRUE	2.73519e-06	0.00291314	23.9546	29.788	23.9423
rs138201625	C	G	C	G	0.330102	0.044025	0.0129099	0.019418	FALSE	TRUE	FALSE	ieu-a-7	1	158442256	0.0371105	184305	0.235495	Coronary heart disease || id:ieu-a-7	Coronary heart disease	Coronary heart disease || ||	TRUE	igd	1	158472466	0.0688063	1.6062e-06	GCST90199638	Glycerol 3-phosphate levels	8201	2	TRUE			0.00279938	8201	7.63606e-06	184305	TRUE	8.70814e-06	0.00277719	22.8336	29.788	23.0165
rs143671553	G	A	G	A	-0.236422	-0.03445	0.0235791	0.02048	FALSE	FALSE	FALSE	ieu-a-7	6	77602964	0.0357548	184305	0.335293	Coronary heart disease || id:ieu-a-7	Coronary heart disease	Coronary heart disease || ||	TRUE	igd	6	76893247	0.0500149	2.27834e-06	GCST90199638	Glycerol 3-phosphate levels	8201	2	TRUE			0.0027179	8201	5.03704e-06	184305	TRUE	9.68603e-06	0.00257377	21.1568	29.788	22.3448
rs149000340	T	C	T	C	-0.283142	0.009645	0.0174881	0.012102	FALSE	FALSE	FALSE	ieu-a-7	2	207948902	0.060762	184305	0.873879	Coronary heart disease || id:ieu-a-7	Coronary heart disease	Coronary heart disease || ||	TRUE	igd	2	207084178	0.059454	1.91329e-06	GCST90199638	Glycerol 3-phosphate levels	8201	2	TRUE			0.00275858	8201	1.36712e-07	184305	TRUE	3.7519e-06	0.00275498	22.6505	29.788	22.6802
rs149344982	A	G	A	G	0.321236	-0.071944	0.0133024	0.011863	FALSE	FALSE	FALSE	ieu-a-7	1	21889760	0.0487207	184305	0.139766	Coronary heart disease || id:ieu-a-7	Coronary heart disease	Coronary heart disease || ||	TRUE	igd	1	21563267	0.0677323	2.10864e-06	GCST90199638	Glycerol 3-phosphate levels	8201	2	TRUE			0.00273594	8201	1.18311e-05	184305	TRUE	1.46752e-05	0.0027089	22.2706	29.788	22.4935
rs162416	G	T	G	T	0.0765529	0.009272	0.289002	0.322341	FALSE	FALSE	FALSE	ieu-a-7	3	366039	0.0099351	184305	0.350687	Coronary heart disease || id:ieu-a-7	Coronary heart disease	Coronary heart disease || ||	TRUE	igd	3	324356	0.0172667	9.26914e-06	GCST90199638	Glycerol 3-phosphate levels	8201	2	TRUE			0.00239168	8201	4.72572e-06	184305	TRUE	3.41991e-05	0.00240837	19.7939	29.788	19.6564
rs16840029	A	G	A	G	0.170339	-0.017846	0.0445551	0.052402	FALSE	FALSE	FALSE	ieu-a-7	1	240604710	0.0209358	184305	0.393984	Coronary heart disease || id:ieu-a-7	Coronary heart disease	Coronary heart disease || ||	TRUE	igd	1	240441410	0.0376776	6.15552e-06	GCST90199638	Glycerol 3-phosphate levels	8201	2	TRUE			0.00248668	8201	3.94247e-06	184305	TRUE	2.17977e-05	0.00247037	20.3047	29.788	20.4391
rs1780318	T	A	T	A	0.448805	-0.019337	0.943146	0.908306	FALSE	TRUE	FALSE	ieu-a-7	1	21895625	0.0213888	184305	0.365958	Coronary heart disease || id:ieu-a-7	Coronary heart disease	Coronary heart disease || ||	TRUE	igd	1	21569132	0.0333781	3.24475e-41	GCST90199638	Glycerol 3-phosphate levels	8201	2	TRUE			0.0215754	8201	4.43477e-06	184305	TRUE	3.40819e-38	0.0216016	181.022	29.788	180.797
rs186366783	A	T	A	T	0.2955	0.035762	0.0223242	0.01327	FALSE	TRUE	FALSE	ieu-a-7	20	5497227	0.0463569	184305	0.440441	Coronary heart disease || id:ieu-a-7	Coronary heart disease	Coronary heart disease || ||	TRUE	igd	20	5516581	0.0524575	1.76967e-08	GCST90199638	Glycerol 3-phosphate levels	8201	2	TRUE			0.00385533	8201	3.2291e-06	184305	TRUE	8.85434e-08	0.00381167	31.3715	29.788	31.7322
rs186970614	C	G	C	G	0.354048	-0.03431	0.00966006	0.022459	FALSE	TRUE	FALSE	ieu-a-7	20	40833735	0.0397328	184305	0.387853	Coronary heart disease || id:ieu-a-7	Coronary heart disease	Coronary heart disease || ||	TRUE	igd	20	42205095	0.07965	8.78718e-06	GCST90199638	Glycerol 3-phosphate levels	8201	2	TRUE			0.00240407	8201	4.04584e-06	184305	TRUE	3.0573e-05	0.00239838	19.7116	29.788	19.7584
rs337370	T	C	T	C	-0.0731129	0.030894	0.519666	0.49903	FALSE	FALSE	FALSE	ieu-a-7	5	176927084	0.0130223	184305	0.0176734	Coronary heart disease || id:ieu-a-7	Coronary heart disease	Coronary heart disease || ||	TRUE	igd	5	177500083	0.0158083	3.74668e-06	GCST90199638	Glycerol 3-phosphate levels	8201	2	TRUE			0.00260211	8201	3.05371e-05	184305	TRUE	5.49295e-05	0.00266861	21.9385	29.788	21.3903
rs3750309	G	T	G	T	0.0779824	-0.01105	0.455985	0.464051	FALSE	FALSE	FALSE	ieu-a-7	8	61788568	0.0092486	184305	0.232173	Coronary heart disease || id:ieu-a-7	Coronary heart disease	Coronary heart disease || ||	TRUE	igd	8	60876009	0.015705	6.85374e-07	GCST90199638	Glycerol 3-phosphate levels	8201	2	TRUE			0.00299814	8201	7.74527e-06	184305	TRUE	4.04066e-06	0.00301706	24.8118	29.788	24.6557
rs4709324	C	T	C	T	-0.0959369	0.002952	0.171541	0.218204	FALSE	FALSE	FALSE	ieu-a-7	6	159863163	0.0113125	184305	0.794131	Coronary heart disease || id:ieu-a-7	Coronary heart disease	Coronary heart disease || ||	TRUE	igd	6	159442131	0.0210023	4.92582e-06	GCST90199638	Glycerol 3-phosphate levels	8201	2	TRUE			0.00253848	8201	3.69473e-07	184305	TRUE	1.01675e-05	0.00261602	21.505	29.788	20.8659
rs56704741	C	T	C	T	-0.104833	-0.01053	0.344183	0.302297	FALSE	FALSE	FALSE	ieu-a-7	1	21704844	0.011117	184305	0.343537	Coronary heart disease || id:ieu-a-7	Coronary heart disease	Coronary heart disease || ||	TRUE	igd	1	21378351	0.0165102	2.15937e-10	GCST90199638	Glycerol 3-phosphate levels	8201	2	TRUE			0.00489328	8201	4.86796e-06	184305	TRUE	1.83264e-09	0.00496133	40.8808	29.788	40.3173
rs6695630	G	C	G	C	-0.110939	0.004731	0.12601	0.142493	FALSE	TRUE	FALSE	ieu-a-7	1	40067911	0.0137827	184305	0.731405	Coronary heart disease || id:ieu-a-7	Coronary heart disease	Coronary heart disease || ||	TRUE	igd	1	39602239	0.0235356	2.43304e-06	GCST90199638	Glycerol 3-phosphate levels	8201	2	TRUE			0.0027026	8201	6.393e-07	184305	TRUE	5.65197e-06	0.00271088	22.2869	29.788	22.2187
rs6945869	T	C	T	C	-0.18358	0.012103	0.0389125	0.057994	FALSE	FALSE	FALSE	ieu-a-7	7	153893727	0.021278	184305	0.56949	Coronary heart disease || id:ieu-a-7	Coronary heart disease	Coronary heart disease || ||	TRUE	igd	7	154196642	0.0411328	8.07826e-06	GCST90199638	Glycerol 3-phosphate levels	8201	2	TRUE			0.00242359	8201	1.75546e-06	184305	TRUE	2.16052e-05	0.00252077	20.72	29.788	19.9193
rs72650882	C	T	C	T	0.193643	0.034209	0.0394383	0.036891	FALSE	FALSE	FALSE	ieu-a-7	1	21040310	0.0267974	184305	0.201751	Coronary heart disease || id:ieu-a-7	Coronary heart disease	Coronary heart disease || ||	TRUE	igd	1	20713817	0.0400346	1.31888e-06	GCST90199638	Glycerol 3-phosphate levels	8201	2	TRUE			0.00284534	8201	8.84218e-06	184305	TRUE	7.9399e-06	0.00284104	23.36	29.788	23.3955
rs72852030	T	C	T	C	0.269297	0.059846	0.0168581	0.021885	FALSE	FALSE	FALSE	ieu-a-7	2	29445113	0.037897	184305	0.114296	Coronary heart disease || id:ieu-a-7	Coronary heart disease	Coronary heart disease || ||	TRUE	igd	2	29222247	0.0591747	5.34198e-06	GCST90199638	Glycerol 3-phosphate levels	8201	2	TRUE			0.00251962	8201	1.35308e-05	184305	TRUE	3.7091e-05	0.00240391	19.7571	29.788	20.7105
rs7319463	A	G	A	G	-0.217628	-0.023795	0.0285504	0.05714	FALSE	FALSE	FALSE	ieu-a-7	13	31992607	0.0194389	184305	0.220918	Coronary heart disease || id:ieu-a-7	Coronary heart disease	Coronary heart disease || ||	TRUE	igd	13	31418470	0.0465571	2.94778e-06	GCST90199638	Glycerol 3-phosphate levels	8201	2	TRUE			0.00265791	8201	8.13003e-06	184305	TRUE	1.56812e-05	0.00262719	21.5971	29.788	21.8503
rs73499488	G	C	G	C	0.248377	-0.067745	0.0231351	0.021906	FALSE	TRUE	FALSE	ieu-a-7	11	80058536	0.0350607	184305	0.0533323	Coronary heart disease || id:ieu-a-7	Coronary heart disease	Coronary heart disease || ||	TRUE	igd	11	80347492	0.0518527	1.66738e-06	GCST90199638	Glycerol 3-phosphate levels	8201	2	TRUE			0.00279065	8201	2.02569e-05	184305	TRUE	1.82139e-05	0.00278842	22.9262	29.788	22.9446
rs74622263	G	A	G	A	-0.148881	-0.040271	0.0567904	0.051864	FALSE	FALSE	FALSE	ieu-a-7	16	87395304	0.0257839	184305	0.118319	Coronary heart disease || id:ieu-a-7	Coronary heart disease	Coronary heart disease || ||	TRUE	igd	16	87361698	0.0334532	8.57032e-06	GCST90199638	Glycerol 3-phosphate levels	8201	2	TRUE			0.00240987	8201	1.32358e-05	184305	TRUE	5.57061e-05	0.00237461	19.5157	29.788	19.8063
rs75198564	G	A	G	A	0.0914908	0.009247	0.180152	0.141296	FALSE	FALSE	FALSE	ieu-a-7	12	125805770	0.0149026	184305	0.534933	Coronary heart disease || id:ieu-a-7	Coronary heart disease	Coronary heart disease || ||	TRUE	igd	12	125321224	0.0201541	5.63715e-06	GCST90199638	Glycerol 3-phosphate levels	8201	2	TRUE			0.00250713	8201	2.08903e-06	184305	TRUE	1.62027e-05	0.00247262	20.3233	29.788	20.6076
rs79393239	T	C	T	C	-0.213038	0.014701	0.0279306	0.054402	FALSE	FALSE	FALSE	ieu-a-7	4	185258037	0.0198854	184305	0.459733	Coronary heart disease || id:ieu-a-7	Coronary heart disease	Coronary heart disease || ||	TRUE	igd	4	184336884	0.0470789	6.03565e-06	GCST90199638	Glycerol 3-phosphate levels	8201	2	TRUE			0.00249125	8201	2.96546e-06	184305	TRUE	1.92818e-05	0.00246446	20.256	29.788	20.4768
rs7968044	C	A	C	A	-0.0992173	0.004119	0.140581	0.115999	FALSE	FALSE	FALSE	ieu-a-7	12	97691945	0.0153513	184305	0.788455	Coronary heart disease || id:ieu-a-7	Coronary heart disease	Coronary heart disease || ||	TRUE	igd	12	97298167	0.022321	8.78797e-06	GCST90199638	Glycerol 3-phosphate levels	8201	2	TRUE			0.00240404	8201	3.90626e-07	184305	TRUE	1.77103e-05	0.00237868	19.5493	29.788	19.7582
rs10277377	T	C	T	C	0.116516	-0.011823	0.0950995	0.102303	FALSE	FALSE	FALSE	ieu-a-7	7	54976715	0.016569	184305	0.475498	Coronary heart disease || id:ieu-a-7	Coronary heart disease	Coronary heart disease || ||	TRUE	igd	7	54909022	0.0256952	5.77319e-06	GCST90199639	Imidazole lactate levels	8256	2	TRUE			0.00248498	8256	2.76267e-06	184305	TRUE	1.81536e-05	0.00233658	19.3313	29.788	20.5621
rs10774021	T	C	T	C	0.194878	0.008824	0.651353	0.607257	FALSE	FALSE	FALSE	ieu-a-7	12	349298	0.009606	184305	0.358307	Coronary heart disease || id:ieu-a-7	Coronary heart disease	Coronary heart disease || ||	TRUE	igd	12	240132	0.0158871	1.37213e-34	GCST90199639	Imidazole lactate levels	8256	2	TRUE			0.017903	8256	4.57838e-06	184305	TRUE	5.33864e-32	0.0172488	144.87	29.788	150.465
rs11076256	T	C	T	C	0.714384	-0.014589	0.0774033	0.077272	FALSE	FALSE	FALSE	ieu-a-7	16	58752466	0.0183635	184305	0.42693	Coronary heart disease || id:ieu-a-7	Coronary heart disease	Coronary heart disease || ||	TRUE	igd	16	58718562	0.0271182	6.11518e-153	GCST90199639	Imidazole lactate levels	8256	2	TRUE			0.0775563	8256	3.42457e-06	184305	TRUE	9.1415e-141	0.0728895	648.93	29.788	693.972
rs11672362	T	C	T	C	0.184489	-0.012077	0.0352009	0.037105	FALSE	FALSE	FALSE	ieu-a-7	19	44149900	0.0269571	184305	0.654146	Coronary heart disease || id:ieu-a-7	Coronary heart disease	Coronary heart disease || ||	TRUE	igd	19	43645748	0.0415283	8.89242e-06	GCST90199639	Imidazole lactate levels	8256	2	TRUE			0.00238534	8256	1.08903e-06	184305	TRUE	2.12344e-05	0.00231186	19.1263	29.788	19.7357
rs116793365	G	A	G	A	-0.300561	0.010243	0.0127972	0.026273	FALSE	FALSE	FALSE	ieu-a-7	3	37107190	0.0393178	184305	0.794464	Coronary heart disease || id:ieu-a-7	Coronary heart disease	Coronary heart disease || ||	TRUE	igd	3	37065699	0.0670653	7.40785e-06	GCST90199639	Imidazole lactate levels	8256	2	TRUE			0.00242745	8256	3.68251e-07	184305	TRUE	1.50096e-05	0.00228253	18.8831	29.788	20.0849
rs12601778	T	C	T	C	-0.107145	0.000987	0.434368	0.441528	FALSE	FALSE	FALSE	ieu-a-7	17	80191348	0.0113549	184305	0.930733	Coronary heart disease || id:ieu-a-7	Coronary heart disease	Coronary heart disease || ||	TRUE	igd	17	82233472	0.0153104	2.59273e-12	GCST90199639	Imidazole lactate levels	8256	2	TRUE			0.00589844	8256	4.09954e-08	184305	TRUE	9.01533e-12	0.00564112	46.826	29.788	48.9746
rs143277630	T	C	T	C	-0.312217	-0.037041	0.0475578	0.049301	FALSE	FALSE	FALSE	ieu-a-7	16	58815575	0.0252136	184305	0.141809	Coronary heart disease || id:ieu-a-7	Coronary heart disease	Coronary heart disease || ||	TRUE	igd	16	58781671	0.0355437	1.57688e-18	GCST90199639	Imidazole lactate levels	8256	2	TRUE			0.00926152	8256	1.171e-05	184305	TRUE	1.27668e-16	0.00883087	73.5394	29.788	77.1592
rs1441770	A	G	A	G	-0.0757838	-0.014482	0.399513	0.364726	FALSE	FALSE	FALSE	ieu-a-7	8	19757319	0.0101122	184305	0.152105	Coronary heart disease || id:ieu-a-7	Coronary heart disease	Coronary heart disease || ||	TRUE	igd	8	19899808	0.0157461	1.48783e-06	GCST90199639	Imidazole lactate levels	8256	2	TRUE			0.0027985	8256	1.11283e-05	184305	TRUE	1.03554e-05	0.00275561	22.8076	29.788	23.1636
rs145281230	G	A	G	A	-0.439015	0.050393	0.0105506	0.011474	FALSE	FALSE	FALSE	ieu-a-7	3	50243282	0.0599778	184305	0.400799	Coronary heart disease || id:ieu-a-7	Coronary heart disease	Coronary heart disease || ||	TRUE	igd	3	50205849	0.0738951	2.8318e-09	GCST90199639	Imidazole lactate levels	8256	2	TRUE			0.00425804	8256	3.83023e-06	184305	TRUE	1.76164e-08	0.00402401	33.3484	29.788	35.2962
rs146849590	C	A	C	A	-0.504435	0.034629	0.00444851	0.009161	FALSE	FALSE	FALSE	ieu-a-7	12	89466834	0.0626098	184305	0.5802	Coronary heart disease || id:ieu-a-7	Coronary heart disease	Coronary heart disease || ||	TRUE	igd	12	89073057	0.114153	9.9186e-06	GCST90199639	Imidazole lactate levels	8256	2	TRUE			0.00236018	8256	1.65982e-06	184305	TRUE	2.5909e-05	0.00225382	18.645	29.788	19.527
rs148327605	T	C	T	C	0.137958	-0.040902	0.0658858	0.061155	FALSE	FALSE	FALSE	ieu-a-7	10	93985714	0.0211683	184305	0.053331	Coronary heart disease || id:ieu-a-7	Coronary heart disease	Coronary heart disease || ||	TRUE	igd	10	92225957	0.0306471	6.74724e-06	GCST90199639	Imidazole lactate levels	8256	2	TRUE			0.00244898	8256	2.0257e-05	184305	TRUE	6.28389e-05	0.00234269	19.382	29.788	20.2635
rs149262976	C	T	C	T	0.405513	-0.080031	0.00729306	0.007638	FALSE	FALSE	FALSE	ieu-a-7	7	79116778	0.0779339	184305	0.304464	Coronary heart disease || id:ieu-a-7	Coronary heart disease	Coronary heart disease || ||	TRUE	igd	7	79487462	0.0885376	4.64715e-06	GCST90199639	Imidazole lactate levels	8256	2	TRUE			0.00253505	8256	5.72175e-06	184305	TRUE	1.98894e-05	0.00238106	19.7002	29.788	20.9775
rs150565193	T	C	T	C	-0.248798	-0.031785	0.0195122	0.021901	FALSE	FALSE	FALSE	ieu-a-7	3	26763051	0.0375429	184305	0.3972	Coronary heart disease || id:ieu-a-7	Coronary heart disease	Coronary heart disease || ||	TRUE	igd	3	26721560	0.0546598	5.32028e-06	GCST90199639	Imidazole lactate levels	8256	2	TRUE			0.00250383	8256	3.88915e-06	184305	TRUE	1.90508e-05	0.00236849	19.596	29.788	20.7185
rs183176218	A	T	A	T	-0.173245	0.030944	0.0392564	0.039792	FALSE	TRUE	FALSE	ieu-a-7	16	83859113	0.0271874	184305	0.255047	Coronary heart disease || id:ieu-a-7	Coronary heart disease	Coronary heart disease || ||	TRUE	igd	16	83825508	0.0390076	8.94059e-06	GCST90199639	Imidazole lactate levels	8256	2	TRUE			0.00238409	8256	7.02881e-06	184305	TRUE	4.00019e-05	0.00226396	18.7292	29.788	19.7253
rs2229742	C	G	C	G	0.116801	0.039336	0.0999389	0.095152	FALSE	TRUE	FALSE	ieu-a-7	21	16339172	0.0166581	184305	0.0182071	Coronary heart disease || id:ieu-a-7	Coronary heart disease	Coronary heart disease || ||	TRUE	igd	21	14966851	0.0254704	4.52323e-06	GCST90199639	Imidazole lactate levels	8256	2	TRUE			0.00254128	8256	3.02541e-05	184305	TRUE	6.4595e-05	0.00245431	20.3077	29.788	21.0291
rs2315488	A	G	A	G	-0.0871675	0.003714	0.220711	0.230244	FALSE	FALSE	FALSE	ieu-a-7	4	140123557	0.0108269	184305	0.731574	Coronary heart disease || id:ieu-a-7	Coronary heart disease	Coronary heart disease || ||	TRUE	igd	4	139202403	0.0184136	2.20296e-06	GCST90199639	Imidazole lactate levels	8256	2	TRUE			0.00270763	8256	6.38473e-07	184305	TRUE	5.16638e-06	0.00261374	21.6303	29.788	22.4095
rs2805103	A	T	A	T	0.0969957	0.0126	0.70863	0.667395	FALSE	TRUE	FALSE	ieu-a-7	9	131598897	0.0100655	184305	0.21064	Coronary heart disease || id:ieu-a-7	Coronary heart disease	Coronary heart disease || ||	TRUE	igd	9	128836618	0.0168381	8.38658e-09	GCST90199639	Imidazole lactate levels	8256	2	TRUE			0.00400416	8256	8.50226e-06	184305	TRUE	7.7686e-08	0.00388507	32.1925	29.788	33.1832
rs4150575	T	C	T	C	0.107027	-0.010457	0.688358	0.666162	FALSE	FALSE	FALSE	ieu-a-7	11	18356466	0.0101643	184305	0.303575	Coronary heart disease || id:ieu-a-7	Coronary heart disease	Coronary heart disease || ||	TRUE	igd	11	18334919	0.0165673	1.04616e-10	GCST90199639	Imidazole lactate levels	8256	2	TRUE			0.0050307	8256	5.74281e-06	184305	TRUE	1.05083e-09	0.00491459	40.7653	29.788	41.7333
rs490379	C	A	C	A	-0.133215	-0.025163	0.136264	0.123255	FALSE	FALSE	FALSE	ieu-a-7	1	88717899	0.0140662	184305	0.0736309	Coronary heart disease || id:ieu-a-7	Coronary heart disease	Coronary heart disease || ||	TRUE	igd	1	88252216	0.0219505	1.28793e-09	GCST90199639	Imidazole lactate levels	8256	2	TRUE			0.00444242	8256	1.73633e-05	184305	TRUE	2.66265e-08	0.00417733	34.6243	29.788	36.8313
rs61774831	A	C	A	C	0.317674	-0.012412	0.0119251	0.01394	FALSE	FALSE	FALSE	ieu-a-7	1	54345089	0.058394	184305	0.831673	Coronary heart disease || id:ieu-a-7	Coronary heart disease	Coronary heart disease || ||	TRUE	igd	1	53879416	0.0703736	6.35844e-06	GCST90199639	Imidazole lactate levels	8256	2	TRUE			0.00246268	8256	2.4514e-07	184305	TRUE	1.2412e-05	0.00237818	19.6763	29.788	20.3772
rs61798917	A	G	A	G	0.0769112	0.011671	0.382142	0.360209	FALSE	FALSE	FALSE	ieu-a-7	1	89506093	0.0096038	184305	0.224271	Coronary heart disease || id:ieu-a-7	Coronary heart disease	Coronary heart disease || ||	TRUE	igd	1	89040410	0.0155656	7.76861e-07	GCST90199639	Imidazole lactate levels	8256	2	TRUE			0.00294917	8256	8.01298e-06	184305	TRUE	4.65442e-06	0.00279333	23.1207	29.788	24.4145
rs72933650	T	C	T	C	0.132911	-0.004699	0.0722807	0.075065	FALSE	FALSE	FALSE	ieu-a-7	6	106327576	0.0213888	184305	0.826109	Coronary heart disease || id:ieu-a-7	Coronary heart disease	Coronary heart disease || ||	TRUE	igd	6	105879701	0.0300497	9.73273e-06	GCST90199639	Imidazole lactate levels	8256	2	TRUE			0.00236455	8256	2.61882e-07	184305	TRUE	1.87093e-05	0.00236914	19.6013	29.788	19.5633
rs72943057	C	T	C	T	-0.219653	-0.001854	0.0234716	0.022362	FALSE	FALSE	FALSE	ieu-a-7	6	107022022	0.0413622	184305	0.964248	Coronary heart disease || id:ieu-a-7	Coronary heart disease	Coronary heart disease || ||	TRUE	igd	6	106574147	0.0494957	9.08721e-06	GCST90199639	Imidazole lactate levels	8256	2	TRUE			0.00238034	8256	1.09013e-08	184305	TRUE	1.48834e-05	0.00221173	18.2961	29.788	19.6942
rs7530513	A	G	A	G	0.397623	0.030674	0.50267	0.459875	FALSE	FALSE	FALSE	ieu-a-7	1	89409911	0.0092822	184305	0.000951196	Coronary heart disease || id:ieu-a-7	Coronary heart disease	Coronary heart disease || ||	TRUE	igd	1	88944228	0.0144873	7.70378e-166	GCST90199639	Imidazole lactate levels	8256	2	TRUE			0.0836322	8256	5.9249e-05	184305	TRUE	1.76094e-146	0.0790498	708.482	29.788	753.3
rs7563086	T	C	T	C	0.14342	0.004127	0.0697089	0.082435	FALSE	FALSE	FALSE	ieu-a-7	2	46369496	0.0174087	184305	0.812606	Coronary heart disease || id:ieu-a-7	Coronary heart disease	Coronary heart disease || ||	TRUE	igd	2	46142357	0.0297498	1.42921e-06	GCST90199639	Imidazole lactate levels	8256	2	TRUE			0.0028078	8256	3.04933e-07	184305	TRUE	3.08837e-06	0.00266782	22.0791	29.788	23.2408
rs9878908	T	C	T	C	-0.086292	-0.007912	0.795375	0.782903	FALSE	FALSE	FALSE	ieu-a-7	3	12302462	0.0116492	184305	0.49702	Coronary heart disease || id:ieu-a-7	Coronary heart disease	Coronary heart disease || ||	TRUE	igd	3	12260963	0.0187632	4.24526e-06	GCST90199639	Imidazole lactate levels	8256	2	TRUE			0.00255594	8256	2.50292e-06	184305	TRUE	1.32121e-05	0.00242383	20.0549	29.788	21.1508
rs114708452	T	C	T	C	0.193902	-0.018777	0.0385138	0.032145	FALSE	FALSE	FALSE	ieu-a-7	3	146509262	0.0287983	184305	0.514391	Coronary heart disease || id:ieu-a-7	Coronary heart disease	Coronary heart disease || ||	TRUE	igd	3	146791475	0.039056	6.8796e-07	GCST90199640	4-guanidinobutanoate levels	8144	2	TRUE			0.00301818	8144	2.30667e-06	184305	TRUE	2.3386e-06	0.00278454	22.7351	29.788	24.6484
rs11580678	T	G	T	G	-0.0749203	-0.009909	0.329111	0.283746	FALSE	FALSE	FALSE	ieu-a-7	1	90625128	0.0111007	184305	0.372045	Coronary heart disease || id:ieu-a-7	Coronary heart disease	Coronary heart disease || ||	TRUE	igd	1	90159570	0.0161818	3.65841e-06	GCST90199640	4-guanidinobutanoate levels	8144	2	TRUE			0.00262586	8144	4.32339e-06	184305	TRUE	1.39237e-05	0.00247869	20.2316	29.788	21.4361
rs11787780	T	C	T	C	0.0743765	0.016994	0.285195	0.308041	FALSE	FALSE	FALSE	ieu-a-7	9	136455110	0.0112082	184305	0.129466	Coronary heart disease || id:ieu-a-7	Coronary heart disease	Coronary heart disease || ||	TRUE	igd	9	133589988	0.0165161	6.69172e-06	GCST90199640	4-guanidinobutanoate levels	8144	2	TRUE			0.00248453	8144	1.24733e-05	184305	TRUE	4.25748e-05	0.00225544	18.4053	29.788	20.2795
rs13107325	T	C	T	C	0.131282	-0.00667	0.0736144	0.061282	FALSE	FALSE	FALSE	ieu-a-7	4	103188709	0.0223469	184305	0.765341	Coronary heart disease || id:ieu-a-7	Coronary heart disease	Coronary heart disease || ||	TRUE	igd	4	102267552	0.0286355	4.54884e-06	GCST90199640	4-guanidinobutanoate levels	8144	2	TRUE			0.00257484	8144	4.83375e-07	184305	TRUE	9.73505e-06	0.00235069	19.1844	29.788	21.0185
rs13163650	G	A	G	A	0.0793781	-0.001372	0.726177	0.446414	FALSE	FALSE	FALSE	ieu-a-7	5	155237921	0.0103609	184305	0.894652	Coronary heart disease || id:ieu-a-7	Coronary heart disease	Coronary heart disease || ||	TRUE	igd	5	155810911	0.0168637	2.51326e-06	GCST90199640	4-guanidinobutanoate levels	8144	2	TRUE			0.00271384	8144	9.51439e-08	184305	TRUE	4.72151e-06	0.00250579	20.4534	29.788	22.1562
rs140852306	T	C	T	C	-0.128618	-0.011939	0.0768229	0.080531	FALSE	FALSE	FALSE	ieu-a-7	9	98498525	0.0172436	184305	0.488703	Coronary heart disease || id:ieu-a-7	Coronary heart disease	Coronary heart disease || ||	TRUE	igd	9	95736243	0.0280679	4.59712e-06	GCST90199640	4-guanidinobutanoate levels	8144	2	TRUE			0.00257237	8144	2.60104e-06	184305	TRUE	1.42607e-05	0.00234644	19.1496	29.788	20.9983
rs150629268	T	G	T	G	0.220045	0.010833	0.0254143	0.011448	FALSE	FALSE	FALSE	ieu-a-7	8	24363866	0.0617614	184305	0.860765	Coronary heart disease || id:ieu-a-7	Coronary heart disease	Coronary heart disease || ||	TRUE	igd	8	24506353	0.0478751	4.30212e-06	GCST90199640	4-guanidinobutanoate levels	8144	2	TRUE			0.0025879	8144	1.66929e-07	184305	TRUE	8.20871e-06	0.00239856	19.5761	29.788	21.1253
rs151040866	A	G	A	G	-0.159233	0.027606	0.0549247	0.060579	FALSE	FALSE	FALSE	ieu-a-7	4	6545277	0.0240089	184305	0.250217	Coronary heart disease || id:ieu-a-7	Coronary heart disease	Coronary heart disease || ||	TRUE	igd	4	6543550	0.0326279	1.05939e-06	GCST90199640	4-guanidinobutanoate levels	8144	2	TRUE			0.00291668	8144	7.17343e-06	184305	TRUE	5.71092e-06	0.00263227	21.4885	29.788	23.817
rs45622433	A	G	A	G	-0.392152	-0.013207	0.00786531	0.021313	FALSE	FALSE	FALSE	ieu-a-7	14	75489756	0.041435	184305	0.749924	Coronary heart disease || id:ieu-a-7	Coronary heart disease	Coronary heart disease || ||	TRUE	igd	14	75023053	0.0846735	3.63311e-06	GCST90199640	4-guanidinobutanoate levels	8144	2	TRUE			0.00262748	8144	5.5124e-07	184305	TRUE	8.0256e-06	0.00240008	19.5884	29.788	21.4493
rs57389554	A	G	A	G	-0.14118	0.014156	0.0592876	0.108815	FALSE	FALSE	FALSE	ieu-a-7	2	152704730	0.0153665	184305	0.356932	Coronary heart disease || id:ieu-a-7	Coronary heart disease	Coronary heart disease || ||	TRUE	igd	2	151848216	0.0313033	6.48089e-06	GCST90199640	4-guanidinobutanoate levels	8144	2	TRUE			0.00249202	8144	4.60465e-06	184305	TRUE	2.4208e-05	0.00222329	18.1424	29.788	20.3407
rs61287921	A	G	A	G	-0.307334	-0.028746	0.0120779	0.022131	FALSE	FALSE	FALSE	ieu-a-7	6	90055876	0.0320941	184305	0.370424	Coronary heart disease || id:ieu-a-7	Coronary heart disease	Coronary heart disease || ||	TRUE	igd	6	89346157	0.06837	6.95176e-06	GCST90199640	4-guanidinobutanoate levels	8144	2	TRUE			0.00247561	8144	4.35281e-06	184305	TRUE	2.52288e-05	0.00225406	18.394	29.788	20.2065
rs61991622	A	G	A	G	0.139752	0.015424	0.0647691	0.053594	FALSE	FALSE	FALSE	ieu-a-7	14	41853628	0.0272384	184305	0.571218	Coronary heart disease || id:ieu-a-7	Coronary heart disease	Coronary heart disease || ||	TRUE	igd	14	41384425	0.0309457	6.30045e-06	GCST90199640	4-guanidinobutanoate levels	8144	2	TRUE			0.00249861	8144	1.73979e-06	184305	TRUE	1.70103e-05	0.0023661	19.3105	29.788	20.3946
rs6556949	T	C	T	C	0.0747603	-0.007823	0.300935	0.305011	FALSE	FALSE	FALSE	ieu-a-7	5	96482335	0.0132461	184305	0.554796	Coronary heart disease || id:ieu-a-7	Coronary heart disease	Coronary heart disease || ||	TRUE	igd	5	97146631	0.0167779	8.35456e-06	GCST90199640	4-guanidinobutanoate levels	8144	2	TRUE			0.00243264	8144	1.89251e-06	184305	TRUE	2.26423e-05	0.00235159	19.1918	29.788	19.8549
rs706151	G	A	G	A	0.0669338	0.00083	0.467889	0.458197	FALSE	FALSE	FALSE	ieu-a-7	7	134110166	0.0094778	184305	0.930216	Coronary heart disease || id:ieu-a-7	Coronary heart disease	Coronary heart disease || ||	TRUE	igd	7	134425414	0.0149986	8.09437e-06	GCST90199640	4-guanidinobutanoate levels	8144	2	TRUE			0.00244004	8144	4.16111e-08	184305	TRUE	1.37887e-05	0.00223083	18.204	29.788	19.9154
rs71631750	C	G	C	G	0.0985226	0.015037	0.192917	0.197586	FALSE	TRUE	FALSE	ieu-a-7	1	16083898	0.0117361	184305	0.200104	Coronary heart disease || id:ieu-a-7	Coronary heart disease	Coronary heart disease || ||	TRUE	igd	1	15757403	0.0191944	2.85354e-07	GCST90199640	4-guanidinobutanoate levels	8144	2	TRUE			0.00322544	8144	8.90715e-06	184305	TRUE	1.9688e-06	0.00302267	24.6852	29.788	26.3465
rs72632963	C	T	C	T	-0.272225	0.010639	0.0149686	0.04679	FALSE	FALSE	FALSE	ieu-a-7	11	12432686	0.0238699	184305	0.655808	Coronary heart disease || id:ieu-a-7	Coronary heart disease	Coronary heart disease || ||	TRUE	igd	11	12411139	0.0611352	8.47468e-06	GCST90199640	4-guanidinobutanoate levels	8144	2	TRUE			0.00242933	8144	1.07787e-06	184305	TRUE	2.00865e-05	0.00218533	17.8319	29.788	19.8277
rs7380998	G	A	G	A	-0.179866	-0.029995	0.961782	0.927213	FALSE	FALSE	FALSE	ieu-a-7	5	111945504	0.0203579	184305	0.140648	Coronary heart disease || id:ieu-a-7	Coronary heart disease	Coronary heart disease || ||	TRUE	igd	5	112609807	0.0385778	3.12531e-06	GCST90199640	4-guanidinobutanoate levels	8144	2	TRUE			0.00266277	8144	1.17786e-05	184305	TRUE	2.06828e-05	0.00237833	19.4106	29.788	21.7382
rs77951681	C	T	C	T	0.101923	3e-06	0.138948	0.117457	FALSE	FALSE	FALSE	ieu-a-7	18	19167152	0.01944	184305	0.999877	Coronary heart disease || id:ieu-a-7	Coronary heart disease	Coronary heart disease || ||	TRUE	igd	18	21587191	0.021744	2.76668e-06	GCST90199640	4-guanidinobutanoate levels	8144	2	TRUE			0.00269131	8144	1.29216e-13	184305	TRUE	4.54386e-06	0.00248574	20.2893	29.788	21.9718
rs7969761	T	C	T	C	0.0903542	0.009392	0.545855	0.519869	FALSE	FALSE	FALSE	ieu-a-7	12	355842	0.0092931	184305	0.312188	Coronary heart disease || id:ieu-a-7	Coronary heart disease	Coronary heart disease || ||	TRUE	igd	12	246676	0.0151665	2.56147e-09	GCST90199640	4-guanidinobutanoate levels	8144	2	TRUE			0.00434016	8144	5.54192e-06	184305	TRUE	1.93559e-08	0.00404761	33.0896	29.788	35.4916
rs10898981	C	A	C	A	0.0773381	0.002021	0.678023	0.667082	FALSE	FALSE	FALSE	ieu-a-7	11	74092465	0.0100655	184305	0.840866	Coronary heart disease || id:ieu-a-7	Coronary heart disease	Coronary heart disease || ||	TRUE	igd	11	74381420	0.0164678	2.64893e-06	GCST90199641	Glucuronate levels	7988	2	TRUE			0.00275416	7988	2.18741e-07	184305	TRUE	5.25202e-06	0.00261148	20.9099	29.788	22.0554
rs111273747	G	A	G	A	0.349979	-0.007618	0.010158	0.009805	FALSE	FALSE	FALSE	ieu-a-7	2	54387618	0.0616908	184305	0.901722	Coronary heart disease || id:ieu-a-7	Coronary heart disease	Coronary heart disease || ||	TRUE	igd	2	54160481	0.0761519	4.31095e-06	GCST90199641	Glucuronate levels	7988	2	TRUE			0.00263783	7988	8.27387e-08	184305	TRUE	7.75135e-06	0.00246313	19.7192	29.788	21.1214
rs116932970	C	A	C	A	0.16785	-0.005851	0.042454	0.038496	FALSE	FALSE	FALSE	ieu-a-7	22	18553156	0.02649	184305	0.825189	Coronary heart disease || id:ieu-a-7	Coronary heart disease	Coronary heart disease || ||	TRUE	igd	22	18070390	0.0379049	9.50326e-06	GCST90199641	Glucuronate levels	7988	2	TRUE			0.00244939	7988	2.64706e-07	184305	TRUE	1.80114e-05	0.00229061	18.3348	29.788	19.6088
rs117910752	G	A	G	A	0.185814	0.012571	0.0415035	0.028196	FALSE	FALSE	FALSE	ieu-a-7	8	37579166	0.038124	184305	0.741597	Coronary heart disease || id:ieu-a-7	Coronary heart disease	Coronary heart disease || ||	TRUE	igd	8	37721648	0.0381401	1.10542e-06	GCST90199641	Glucuronate levels	7988	2	TRUE			0.0029633	7988	5.89943e-07	184305	TRUE	2.60417e-06	0.00274702	21.9981	29.788	23.7352
rs12050756	G	A	G	A	0.199795	-0.016017	0.0314485	0.078755	FALSE	FALSE	FALSE	ieu-a-7	15	33084626	0.0176259	184305	0.3635	Coronary heart disease || id:ieu-a-7	Coronary heart disease	Coronary heart disease || ||	TRUE	igd	15	32792425	0.0437976	5.07208e-06	GCST90199641	Glucuronate levels	7988	2	TRUE			0.00259902	7988	4.48049e-06	184305	TRUE	1.8802e-05	0.00243177	19.4674	29.788	20.8098
rs12092559	T	G	T	G	-0.106219	0.02787	0.118985	0.132909	FALSE	FALSE	FALSE	ieu-a-7	1	53584825	0.0140499	184305	0.0472955	Coronary heart disease || id:ieu-a-7	Coronary heart disease	Coronary heart disease || ||	TRUE	igd	1	53119153	0.0234488	5.9031e-06	GCST90199641	Glucuronate levels	7988	2	TRUE			0.00256283	7988	2.13494e-05	184305	TRUE	5.61635e-05	0.00236543	18.9351	29.788	20.5193
rs150551895	T	C	T	C	0.264587	-0.057147	0.0176136	0.014266	FALSE	FALSE	FALSE	ieu-a-7	21	18522232	0.0501926	184305	0.254889	Coronary heart disease || id:ieu-a-7	Coronary heart disease	Coronary heart disease || ||	TRUE	igd	21	17149914	0.0586271	6.39044e-06	GCST90199641	Glucuronate levels	7988	2	TRUE			0.00254393	7988	7.03351e-06	184305	TRUE	2.86193e-05	0.00242269	19.3946	29.788	20.3676
rs1561398	T	C	T	C	-0.0832245	-0.012473	0.252229	0.262277	FALSE	FALSE	FALSE	ieu-a-7	5	71486785	0.0107389	184305	0.245449	Coronary heart disease || id:ieu-a-7	Coronary heart disease	Coronary heart disease || ||	TRUE	igd	5	72190958	0.0178383	3.07873e-06	GCST90199641	Glucuronate levels	7988	2	TRUE			0.00271822	7988	7.31959e-06	184305	TRUE	1.50092e-05	0.00261274	20.92	29.788	21.7668
rs62391856	T	C	T	C	0.0882028	-0.003223	0.215529	0.247007	FALSE	FALSE	FALSE	ieu-a-7	5	125784767	0.0120468	184305	0.789054	Coronary heart disease || id:ieu-a-7	Coronary heart disease	Coronary heart disease || ||	TRUE	igd	5	126449075	0.0192251	4.47738e-06	GCST90199641	Glucuronate levels	7988	2	TRUE			0.00262878	7988	3.88369e-07	184305	TRUE	9.21333e-06	0.00263074	21.0645	29.788	21.0488
rs6539427	C	T	C	T	-0.0846334	-0.001415	0.220234	0.248131	FALSE	FALSE	FALSE	ieu-a-7	12	108844304	0.0106673	184305	0.894471	Coronary heart disease || id:ieu-a-7	Coronary heart disease	Coronary heart disease || ||	TRUE	igd	12	108450527	0.0184289	4.38124e-06	GCST90199641	Glucuronate levels	7988	2	TRUE			0.00263397	7988	9.5471e-08	184305	TRUE	7.94078e-06	0.00246015	19.6952	29.788	21.0904
rs73231674	G	T	G	T	-0.140286	-0.033131	0.0645404	0.051626	FALSE	FALSE	FALSE	ieu-a-7	21	44251503	0.0245477	184305	0.177126	Coronary heart disease || id:ieu-a-7	Coronary heart disease	Coronary heart disease || ||	TRUE	igd	21	42831393	0.031236	7.08371e-06	GCST90199641	Glucuronate levels	7988	2	TRUE			0.00251938	7988	9.8835e-06	184305	TRUE	3.79255e-05	0.00237638	19.023	29.788	20.1706
rs7510321	C	T	C	T	0.0811601	0.008655	0.771942	0.759468	FALSE	FALSE	FALSE	ieu-a-7	21	32896643	0.0117101	184305	0.459842	Coronary heart disease || id:ieu-a-7	Coronary heart disease	Coronary heart disease || ||	TRUE	igd	21	31524330	0.0183015	9.22398e-06	GCST90199641	Glucuronate levels	7988	2	TRUE			0.00245649	7988	2.96401e-06	184305	TRUE	2.80316e-05	0.00231924	18.5645	29.788	19.6658
rs113682909	C	G	C	G	-0.405067	0.045926	0.00939639	0.015088	FALSE	TRUE	FALSE	ieu-a-7	8	68759003	0.0636939	184305	0.470883	Coronary heart disease || id:ieu-a-7	Coronary heart disease	Coronary heart disease || ||	TRUE	igd	8	67846768	0.0804974	4.85273e-07	GCST90199642	Ribitol levels	8128	2	TRUE			0.00310643	8128	2.8209e-06	184305	TRUE	1.80917e-06	0.00305453	24.8972	29.788	25.3215
rs115232717	G	A	G	A	-0.516457	0.112717	0.0059106	0.009271	FALSE	FALSE	FALSE	ieu-a-7	5	61541904	0.0747707	184305	0.131682	Coronary heart disease || id:ieu-a-7	Coronary heart disease	Coronary heart disease || ||	TRUE	igd	5	62246077	0.0995462	2.12436e-07	GCST90199642	Ribitol levels	8128	2	TRUE			0.00330146	8128	1.23304e-05	184305	TRUE	1.893e-06	0.00313441	25.5503	29.788	26.9165
rs117035597	A	C	A	C	-0.164258	-0.039102	0.0453645	0.044669	FALSE	FALSE	FALSE	ieu-a-7	22	36616889	0.024803	184305	0.11491	Coronary heart disease || id:ieu-a-7	Coronary heart disease	Coronary heart disease || ||	TRUE	igd	22	36220843	0.0368759	8.41487e-06	GCST90199642	Ribitol levels	8128	2	TRUE			0.00243575	8128	1.3485e-05	184305	TRUE	5.49975e-05	0.00233688	19.034	29.788	19.8412
rs117587050	C	T	C	T	0.301156	-0.039613	0.015144	0.013888	FALSE	FALSE	FALSE	ieu-a-7	11	105764500	0.0531266	184305	0.455889	Coronary heart disease || id:ieu-a-7	Coronary heart disease	Coronary heart disease || ||	TRUE	igd	11	105893774	0.0631777	1.87162e-06	GCST90199642	Ribitol levels	8128	2	TRUE			0.00278847	8128	3.0166e-06	184305	TRUE	6.50073e-06	0.00270537	22.0435	29.788	22.7225
rs12144476	C	T	C	T	0.222626	0.05053	0.0264037	0.021144	FALSE	FALSE	FALSE	ieu-a-7	1	184892124	0.0372876	184305	0.175372	Coronary heart disease || id:ieu-a-7	Coronary heart disease	Coronary heart disease || ||	TRUE	igd	1	184922992	0.0482583	3.96485e-06	GCST90199642	Ribitol levels	8128	2	TRUE			0.00261213	8128	9.96398e-06	184305	TRUE	2.29502e-05	0.00254815	20.7592	29.788	21.2818
rs12625462	A	G	A	G	0.100419	-0.005473	0.141742	0.143156	FALSE	FALSE	FALSE	ieu-a-7	20	841096	0.0131092	184305	0.676318	Coronary heart disease || id:ieu-a-7	Coronary heart disease	Coronary heart disease || ||	TRUE	igd	20	860453	0.0222218	6.21488e-06	GCST90199642	Ribitol levels	8128	2	TRUE			0.00250672	8128	9.45727e-07	184305	TRUE	1.46027e-05	0.00245346	19.9858	29.788	20.4208
rs12967772	T	C	T	C	0.114477	0.013039	0.885377	0.743434	FALSE	FALSE	FALSE	ieu-a-7	18	64615675	0.014265	184305	0.360688	Coronary heart disease || id:ieu-a-7	Coronary heart disease	Coronary heart disease || ||	TRUE	igd	18	66948438	0.0245399	3.08744e-06	GCST90199642	Ribitol levels	8128	2	TRUE			0.00267087	8128	4.53326e-06	184305	TRUE	1.21295e-05	0.00265991	21.6721	29.788	21.7616
rs13046014	C	G	C	G	0.143955	-0.013389	0.0710291	0.057206	FALSE	TRUE	FALSE	ieu-a-7	21	25205345	0.021781	184305	0.538746	Coronary heart disease || id:ieu-a-7	Coronary heart disease	Coronary heart disease || ||	TRUE	igd	21	23833029	0.0298658	1.43512e-06	GCST90199642	Ribitol levels	8128	2	TRUE			0.00285094	8128	2.05025e-06	184305	TRUE	4.46751e-06	0.00273478	22.2837	29.788	23.233
rs13100424	G	C	G	C	0.294562	0.064776	0.0200999	0.019057	FALSE	TRUE	FALSE	ieu-a-7	3	62115715	0.0427309	184305	0.129544	Coronary heart disease || id:ieu-a-7	Coronary heart disease	Coronary heart disease || ||	TRUE	igd	3	62130041	0.0550166	8.60081e-08	GCST90199642	Ribitol levels	8128	2	TRUE			0.00351528	8128	1.24683e-05	184305	TRUE	8.43983e-07	0.0034179	27.8691	29.788	28.6659
rs1420467	A	G	A	G	0.0920482	-0.005242	0.792493	0.751473	FALSE	FALSE	FALSE	ieu-a-7	3	168727080	0.0108812	184305	0.629986	Coronary heart disease || id:ieu-a-7	Coronary heart disease	Coronary heart disease || ||	TRUE	igd	3	169009292	0.0191097	1.45859e-06	GCST90199642	Ribitol levels	8128	2	TRUE			0.00284713	8128	1.25924e-06	184305	TRUE	3.97816e-06	0.00278669	22.7079	29.788	23.2019
rs142220999	T	C	T	C	0.334271	0.087178	0.0109313	0.009708	FALSE	FALSE	FALSE	ieu-a-7	10	18765378	0.0539522	184305	0.106129	Coronary heart disease || id:ieu-a-7	Coronary heart disease	Coronary heart disease || ||	TRUE	igd	10	18476449	0.0744908	7.20911e-06	GCST90199642	Ribitol levels	8128	2	TRUE			0.00247195	8128	1.41663e-05	184305	TRUE	4.95915e-05	0.00241616	19.6813	29.788	20.1369
rs144424724	T	C	T	C	-0.331572	-0.012597	0.0110974	0.01126	FALSE	FALSE	FALSE	ieu-a-7	7	3670821	0.0626685	184305	0.840691	Coronary heart disease || id:ieu-a-7	Coronary heart disease	Coronary heart disease || ||	TRUE	igd	7	3631189	0.0738799	7.18982e-06	GCST90199642	Ribitol levels	8128	2	TRUE			0.00247258	8128	2.19232e-07	184305	TRUE	1.36867e-05	0.00241302	19.6556	29.788	20.142
rs145095548	C	A	C	A	0.524916	-0.00094	0.00468731	0.009646	FALSE	FALSE	FALSE	ieu-a-7	14	81253194	0.0601461	184305	0.987531	Coronary heart disease || id:ieu-a-7	Coronary heart disease	Coronary heart disease || ||	TRUE	igd	14	80786850	0.112951	3.363e-06	GCST90199642	Ribitol levels	8128	2	TRUE			0.00265076	8128	1.32528e-09	184305	TRUE	5.55607e-06	0.00257095	20.9454	29.788	21.5973
rs183901354	T	C	T	C	-0.901248	-0.00182	0.00166482	0.015264	FALSE	FALSE	FALSE	ieu-a-7	13	32902447	0.0568569	184305	0.974464	Coronary heart disease || id:ieu-a-7	Coronary heart disease	Coronary heart disease || ||	TRUE	igd	13	32328310	0.188913	1.83581e-06	GCST90199642	Ribitol levels	8128	2	TRUE			0.00279302	8128	5.55961e-09	184305	TRUE	3.16428e-06	0.00269999	21.9995	29.788	22.7596
rs186730428	G	A	G	A	-0.0721017	0.001674	0.377822	0.328508	FALSE	FALSE	FALSE	ieu-a-7	5	118936868	0.0100296	184305	0.867444	Coronary heart disease || id:ieu-a-7	Coronary heart disease	Coronary heart disease || ||	TRUE	igd	5	119601173	0.0158572	5.44296e-06	GCST90199642	Ribitol levels	8128	2	TRUE			0.0025378	8128	1.51151e-07	184305	TRUE	1.01735e-05	0.00244412	19.9096	29.788	20.6746
rs192431765	C	G	C	G	0.406925	0.051247	0.00788428	0.012777	FALSE	TRUE	FALSE	ieu-a-7	13	98939516	0.059956	184305	0.392694	Coronary heart disease || id:ieu-a-7	Coronary heart disease	Coronary heart disease || ||	TRUE	igd	13	98287262	0.0876599	3.44911e-06	GCST90199642	Ribitol levels	8128	2	TRUE			0.00264484	8128	3.96403e-06	184305	TRUE	1.2706e-05	0.0025905	21.1051	29.788	21.549
rs2186050	C	G	C	G	-0.0781457	-0.0056	0.355675	0.383389	FALSE	TRUE	FALSE	ieu-a-7	9	132365981	0.0106673	184305	0.599603	Coronary heart disease || id:ieu-a-7	Coronary heart disease	Coronary heart disease || ||	TRUE	igd	9	129603702	0.0165737	2.41664e-06	GCST90199642	Ribitol levels	8128	2	TRUE			0.0027284	8128	1.49532e-06	184305	TRUE	6.66336e-06	0.00279897	22.8083	29.788	22.2316
rs2744764	T	C	T	C	0.117358	-0.013455	0.0960564	0.10208	FALSE	FALSE	FALSE	ieu-a-7	1	26048613	0.0152318	184305	0.377047	Coronary heart disease || id:ieu-a-7	Coronary heart disease	Coronary heart disease || ||	TRUE	igd	1	25722122	0.0259235	5.98024e-06	GCST90199642	Ribitol levels	8128	2	TRUE			0.00251575	8128	4.2338e-06	184305	TRUE	2.1681e-05	0.00239179	19.4823	29.788	20.4945
rs34552467	C	A	C	A	0.0748839	-0.039443	0.329207	0.358558	FALSE	FALSE	FALSE	ieu-a-7	16	88542695	0.0112604	184305	0.000460405	Coronary heart disease || id:ieu-a-7	Coronary heart disease	Coronary heart disease || ||	TRUE	igd	16	88476287	0.0166187	6.60635e-06	GCST90199642	Ribitol levels	8128	2	TRUE			0.00249243	8128	6.65688e-05	184305	TRUE	0.000226043	0.00247665	20.1752	29.788	20.3041
rs3845611	G	T	G	T	-0.104901	-0.001207	0.13437	0.113595	FALSE	FALSE	FALSE	ieu-a-7	1	13906978	0.015083	184305	0.936218	Coronary heart disease || id:ieu-a-7	Coronary heart disease	Coronary heart disease || ||	TRUE	igd	1	13580483	0.0226947	3.79543e-06	GCST90199642	Ribitol levels	8128	2	TRUE			0.00262237	8128	3.47461e-08	184305	TRUE	6.6395e-06	0.00255991	20.8552	29.788	21.3654
rs60688348	C	A	C	A	0.0788168	-0.012746	0.263264	0.296191	FALSE	FALSE	FALSE	ieu-a-7	7	156845291	0.010689	184305	0.233088	Coronary heart disease || id:ieu-a-7	Coronary heart disease	Coronary heart disease || ||	TRUE	igd	7	157052597	0.0175391	6.99747e-06	GCST90199642	Ribitol levels	8128	2	TRUE			0.00247895	8128	7.71504e-06	184305	TRUE	3.31367e-05	0.00240974	19.6289	29.788	20.194
rs62058095	C	G	C	G	-0.355229	0.091564	0.00930835	0.008534	FALSE	TRUE	FALSE	ieu-a-7	17	55602562	0.0707634	184305	0.195684	Coronary heart disease || id:ieu-a-7	Coronary heart disease	Coronary heart disease || ||	TRUE	igd	17	57525201	0.07998	8.93446e-06	GCST90199642	Ribitol levels	8128	2	TRUE			0.00242172	8128	9.08439e-06	184305	TRUE	4.52717e-05	0.00232733	18.956	29.788	19.7267
rs7190382	T	A	T	A	-0.0809751	-0.00126	0.643304	0.605389	FALSE	TRUE	FALSE	ieu-a-7	16	77538283	0.0096744	184305	0.896376	Coronary heart disease || id:ieu-a-7	Coronary heart disease	Coronary heart disease || ||	TRUE	igd	16	77504386	0.0163858	7.74104e-07	GCST90199642	Ribitol levels	8128	2	TRUE			0.00299632	8128	9.20366e-08	184305	TRUE	1.53327e-06	0.00300918	24.5264	29.788	24.4212
rs7252227	T	G	T	G	-0.0705068	-0.011333	0.581229	0.554508	FALSE	FALSE	FALSE	ieu-a-7	19	41301115	0.0093746	184305	0.226698	Coronary heart disease || id:ieu-a-7	Coronary heart disease	Coronary heart disease || ||	TRUE	igd	19	40795210	0.0155659	5.90998e-06	GCST90199642	Ribitol levels	8128	2	TRUE			0.0025185	8128	7.92955e-06	184305	TRUE	2.88495e-05	0.00242	19.7126	29.788	20.517
rs72688441	A	G	A	G	-0.603321	0.02176	0.0538338	0.054496	FALSE	FALSE	FALSE	ieu-a-7	1	46051053	0.021895	184305	0.320304	Coronary heart disease || id:ieu-a-7	Coronary heart disease	Coronary heart disease || ||	TRUE	igd	1	45585381	0.0335227	2.04224e-72	GCST90199642	Ribitol levels	8128	2	TRUE			0.0383325	8128	5.35912e-06	184305	TRUE	5.3046e-67	0.0370808	312.922	29.788	323.906
rs72722075	T	C	T	C	-0.141262	0.002935	0.123722	0.130659	FALSE	FALSE	FALSE	ieu-a-7	15	45323474	0.0199071	184305	0.882789	Coronary heart disease || id:ieu-a-7	Coronary heart disease	Coronary heart disease || ||	TRUE	igd	15	45031276	0.0235479	1.98631e-09	GCST90199642	Ribitol levels	8128	2	TRUE			0.0044091	8128	1.17942e-07	184305	TRUE	5.34928e-09	0.00432683	35.3126	29.788	35.9871
rs73217598	A	G	A	G	0.307856	-0.016726	0.0144704	0.011418	FALSE	FALSE	FALSE	ieu-a-7	8	14048060	0.0573131	184305	0.770412	Coronary heart disease || id:ieu-a-7	Coronary heart disease	Coronary heart disease || ||	TRUE	igd	8	14190551	0.0648737	2.08033e-06	GCST90199642	Ribitol levels	8128	2	TRUE			0.00276363	8128	4.62108e-07	184305	TRUE	4.60979e-06	0.00270318	22.0256	29.788	22.5195
rs73248229	G	T	G	T	-0.190145	-0.003523	0.0358819	0.028847	FALSE	FALSE	FALSE	ieu-a-7	4	41030928	0.0312196	184305	0.910153	Coronary heart disease || id:ieu-a-7	Coronary heart disease	Coronary heart disease || ||	TRUE	igd	4	41028911	0.0417423	5.23327e-06	GCST90199642	Ribitol levels	8128	2	TRUE			0.00254702	8128	6.90937e-08	184305	TRUE	9.30829e-06	0.00250153	20.3784	29.788	20.75
rs73317157	A	G	A	G	-0.122647	-0.014808	0.0875741	0.081537	FALSE	FALSE	FALSE	ieu-a-7	12	67386599	0.0172914	184305	0.391787	Coronary heart disease || id:ieu-a-7	Coronary heart disease	Coronary heart disease || ||	TRUE	igd	12	66992819	0.0273357	7.23375e-06	GCST90199642	Ribitol levels	8128	2	TRUE			0.00247117	8128	3.97922e-06	184305	TRUE	2.52113e-05	0.0024039	19.5812	29.788	20.1304
rs74995512	A	G	A	G	-0.331117	-0.039839	0.0113902	0.013383	FALSE	FALSE	FALSE	ieu-a-7	2	54587302	0.0562746	184305	0.478983	Coronary heart disease || id:ieu-a-7	Coronary heart disease	Coronary heart disease || ||	TRUE	igd	2	54360165	0.0720991	4.37895e-06	GCST90199642	Ribitol levels	8128	2	TRUE			0.00258881	8128	2.71931e-06	184305	TRUE	1.38116e-05	0.00246916	20.1141	29.788	21.0913
rs77703857	T	C	T	C	0.191571	0.039404	0.0350223	0.043228	FALSE	FALSE	FALSE	ieu-a-7	8	12912425	0.0364794	184305	0.280066	Coronary heart disease || id:ieu-a-7	Coronary heart disease	Coronary heart disease || ||	TRUE	igd	8	13054916	0.0432535	9.46597e-06	GCST90199642	Ribitol levels	8128	2	TRUE			0.0024082	8128	6.33068e-06	184305	TRUE	3.94719e-05	0.00248057	20.2072	29.788	19.6163
rs77987208	C	T	C	T	-0.117677	0.004831	0.132946	0.145059	FALSE	FALSE	FALSE	ieu-a-7	12	4867959	0.014227	184305	0.734184	Coronary heart disease || id:ieu-a-7	Coronary heart disease	Coronary heart disease || ||	TRUE	igd	12	4758793	0.0227397	2.27943e-07	GCST90199642	Ribitol levels	8128	2	TRUE			0.00328479	8128	6.25626e-07	184305	TRUE	5.98618e-07	0.00319253	26.0256	29.788	26.7802
rs7903429	T	C	T	C	0.0970626	0.024375	0.170385	0.165546	FALSE	FALSE	FALSE	ieu-a-7	10	69938352	0.0122945	184305	0.0474122	Coronary heart disease || id:ieu-a-7	Coronary heart disease	Coronary heart disease || ||	TRUE	igd	10	68178595	0.0205295	2.268e-06	GCST90199642	Ribitol levels	8128	2	TRUE			0.00274332	8128	2.13268e-05	184305	TRUE	2.47276e-05	0.00266343	21.7009	29.788	22.3536
rs80012250	G	A	G	A	-0.164302	-0.012209	0.0478994	0.044718	FALSE	FALSE	FALSE	ieu-a-7	7	8288273	0.0245586	184305	0.619092	Coronary heart disease || id:ieu-a-7	Coronary heart disease	Coronary heart disease || ||	TRUE	igd	7	8248643	0.0363521	6.19202e-06	GCST90199642	Ribitol levels	8128	2	TRUE			0.00250761	8128	1.34097e-06	184305	TRUE	1.56729e-05	0.00246223	20.0575	29.788	20.428
rs115155467	G	A	G	A	-0.460446	0.004023	0.00815257	0.039392	FALSE	FALSE	FALSE	ieu-a-7	16	22072216	0.0258871	184305	0.876502	Coronary heart disease || id:ieu-a-7	Coronary heart disease	Coronary heart disease || ||	TRUE	igd	16	22060895	0.0942028	1.0196e-06	GCST90199643	Glycodeoxycholate levels	6877	2	TRUE			0.00346298	6877	1.31039e-07	184305	TRUE	1.87411e-06	0.00342868	23.6533	29.788	23.8908
rs115480587	G	A	G	A	-0.243568	0.003168	0.024909	0.028689	FALSE	FALSE	FALSE	ieu-a-7	4	35292742	0.0296576	184305	0.914932	Coronary heart disease || id:ieu-a-7	Coronary heart disease	Coronary heart disease || ||	TRUE	igd	4	35291120	0.0535613	5.42975e-06	GCST90199643	Glycodeoxycholate levels	6877	2	TRUE			0.00299889	6877	6.19107e-08	184305	TRUE	8.9067e-06	0.00288185	19.87	29.788	20.6794
rs13101279	A	G	A	G	0.0770005	-0.00623	0.608785	0.598951	FALSE	FALSE	FALSE	ieu-a-7	4	43749318	0.0094169	184305	0.508245	Coronary heart disease || id:ieu-a-7	Coronary heart disease	Coronary heart disease || ||	TRUE	igd	4	43747301	0.0172893	8.44267e-06	GCST90199643	Glycodeoxycholate levels	6877	2	TRUE			0.00287679	6877	2.3748e-06	184305	TRUE	2.18611e-05	0.00282421	19.4714	29.788	19.835
rs146174820	A	G	A	G	-0.286214	0.017589	0.0197154	0.018459	FALSE	FALSE	FALSE	ieu-a-7	2	68614232	0.0571599	184305	0.758298	Coronary heart disease || id:ieu-a-7	Coronary heart disease	Coronary heart disease || ||	TRUE	igd	2	68387100	0.0611534	2.86509e-06	GCST90199643	Glycodeoxycholate levels	6877	2	TRUE			0.00317604	6877	5.13768e-07	184305	TRUE	5.7814e-06	0.00316643	21.8383	29.788	21.9049
rs2155345	T	G	T	G	-0.0810837	-0.016196	0.318609	0.330011	FALSE	FALSE	FALSE	ieu-a-7	11	105927688	0.0102479	184305	0.114012	Coronary heart disease || id:ieu-a-7	Coronary heart disease	Coronary heart disease || ||	TRUE	igd	11	106056961	0.0182146	8.52414e-06	GCST90199643	Glycodeoxycholate levels	6877	2	TRUE			0.00287412	6877	1.35521e-05	184305	TRUE	4.72726e-05	0.00285464	19.6818	29.788	19.8165
rs2290258	C	A	C	A	0.124683	-0.017457	0.106372	0.116063	FALSE	FALSE	FALSE	ieu-a-7	2	100017074	0.0156261	184305	0.263922	Coronary heart disease || id:ieu-a-7	Coronary heart disease	Coronary heart disease || ||	TRUE	igd	2	99400611	0.0274227	5.44905e-06	GCST90199643	Glycodeoxycholate levels	6877	2	TRUE			0.0029979	6877	6.77178e-06	184305	TRUE	2.13942e-05	0.00295548	20.3792	29.788	20.6726
rs2351511	T	C	T	C	0.322661	0.004925	0.985905	0.899372	FALSE	FALSE	FALSE	ieu-a-7	14	61549447	0.0185569	184305	0.7907	Coronary heart disease || id:ieu-a-7	Coronary heart disease	Coronary heart disease || ||	TRUE	igd	14	61082729	0.0724084	8.3451e-06	GCST90199643	Glycodeoxycholate levels	6877	2	TRUE			0.00287998	6877	3.82181e-07	184305	TRUE	1.54248e-05	0.0028935	19.9505	29.788	19.8571
rs3132031	C	G	C	G	0.136212	-0.002138	0.083724	0.110044	FALSE	TRUE	FALSE	ieu-a-7	2	114977157	0.0152883	184305	0.888782	Coronary heart disease || id:ieu-a-7	Coronary heart disease	Coronary heart disease || ||	TRUE	igd	2	114219580	0.0306465	8.80501e-06	GCST90199643	Glycodeoxycholate levels	6877	2	TRUE			0.00286517	6877	1.06112e-07	184305	TRUE	1.45721e-05	0.00284667	19.6267	29.788	19.7546
rs55917677	T	C	T	C	0.0908851	0.004996	0.234824	0.221107	FALSE	FALSE	FALSE	ieu-a-7	4	154701051	0.0115254	184305	0.664668	Coronary heart disease || id:ieu-a-7	Coronary heart disease	Coronary heart disease || ||	TRUE	igd	4	153779899	0.0199131	5.01701e-06	GCST90199643	Glycodeoxycholate levels	6877	2	TRUE			0.00302079	6877	1.01953e-06	184305	TRUE	1.10011e-05	0.00296838	20.4684	29.788	20.8309
rs60930884	G	T	G	T	-0.127602	0.006818	0.0979532	0.127969	FALSE	FALSE	FALSE	ieu-a-7	3	70566464	0.0135003	184305	0.61354	Coronary heart disease || id:ieu-a-7	Coronary heart disease	Coronary heart disease || ||	TRUE	igd	3	70517313	0.028606	8.16974e-06	GCST90199643	Glycodeoxycholate levels	6877	2	TRUE			0.00288584	6877	1.38387e-06	184305	TRUE	1.85595e-05	0.00287735	19.8389	29.788	19.8976
rs62448268	A	G	A	G	0.0953227	-0.004961	0.206154	0.22207	FALSE	FALSE	FALSE	ieu-a-7	7	22829464	0.0111235	184305	0.655602	Coronary heart disease || id:ieu-a-7	Coronary heart disease	Coronary heart disease || ||	TRUE	igd	7	22789845	0.0205955	3.68649e-06	GCST90199643	Glycodeoxycholate levels	6877	2	TRUE			0.00310616	6877	1.07925e-06	184305	TRUE	8.30761e-06	0.00297407	20.5077	29.788	21.4214
rs73153108	T	C	T	C	0.230561	0.019395	0.027794	0.023327	FALSE	FALSE	FALSE	ieu-a-7	3	27134161	0.0366608	184305	0.596778	Coronary heart disease || id:ieu-a-7	Coronary heart disease	Coronary heart disease || ||	TRUE	igd	3	27092670	0.0515713	7.7958e-06	GCST90199643	Glycodeoxycholate levels	6877	2	TRUE			0.00289883	6877	1.5186e-06	184305	TRUE	1.81223e-05	0.00287284	19.8077	29.788	19.9874
rs7403557	G	A	G	A	0.101229	0.003289	0.731422	0.655427	FALSE	FALSE	FALSE	ieu-a-7	15	27302979	0.0107281	184305	0.759165	Coronary heart disease || id:ieu-a-7	Coronary heart disease	Coronary heart disease || ||	TRUE	igd	15	27057832	0.019175	1.29754e-07	GCST90199643	Glycodeoxycholate levels	6877	2	TRUE			0.00403747	6877	5.09976e-07	184305	TRUE	3.03224e-07	0.00402604	27.7909	29.788	27.8701
rs74927400	T	C	T	C	0.330046	-0.003336	0.0157956	0.01962	FALSE	FALSE	FALSE	ieu-a-7	11	74942866	0.0397187	184305	0.933064	Coronary heart disease || id:ieu-a-7	Coronary heart disease	Coronary heart disease || ||	TRUE	igd	11	75231821	0.0678883	1.16438e-06	GCST90199643	Glycodeoxycholate levels	6877	2	TRUE			0.00342607	6877	3.82763e-08	184305	TRUE	1.9904e-06	0.00338688	23.364	29.788	23.6352
rs75878687	C	G	C	G	0.274662	-0.009086	0.0193798	0.020008	FALSE	TRUE	FALSE	ieu-a-7	9	7721779	0.0346338	184305	0.793056	Coronary heart disease || id:ieu-a-7	Coronary heart disease	Coronary heart disease || ||	TRUE	igd	9	7721779	0.0617298	8.61017e-06	GCST90199643	Glycodeoxycholate levels	6877	2	TRUE			0.00287135	6877	3.73433e-07	184305	TRUE	1.58494e-05	0.00286733	19.7696	29.788	19.7974
rs7687207	G	A	G	A	0.0783161	0.003803	0.548944	0.559246	FALSE	FALSE	FALSE	ieu-a-7	4	90049968	0.0095755	184305	0.691251	Coronary heart disease || id:ieu-a-7	Coronary heart disease	Coronary heart disease || ||	TRUE	igd	4	89128817	0.0172861	5.88215e-06	GCST90199643	Glycodeoxycholate levels	6877	2	TRUE			0.00297674	6877	8.55849e-07	184305	TRUE	1.23939e-05	0.00303732	20.9452	29.788	20.5262
rs76962381	T	C	T	C	-0.10889	0.012062	0.207403	0.213749	FALSE	FALSE	FALSE	ieu-a-7	8	59176960	0.0112495	184305	0.283619	Coronary heart disease || id:ieu-a-7	Coronary heart disease	Coronary heart disease || ||	TRUE	igd	8	58264401	0.0207547	1.55001e-07	GCST90199643	Glycodeoxycholate levels	6877	2	TRUE			0.00398782	6877	6.23788e-06	184305	TRUE	7.64518e-07	0.00389828	26.9056	29.788	27.526
rs80078071	A	G	A	G	0.0973519	-0.007883	0.191709	0.213827	FALSE	FALSE	FALSE	ieu-a-7	4	181021252	0.0122098	184305	0.518518	Coronary heart disease || id:ieu-a-7	Coronary heart disease	Coronary heart disease || ||	TRUE	igd	4	180100099	0.0216891	7.17216e-06	GCST90199643	Glycodeoxycholate levels	6877	2	TRUE			0.00292188	6877	2.26169e-06	184305	TRUE	1.85064e-05	0.00293717	20.2525	29.788	20.1468
rs9514591	C	T	C	T	-0.0820086	-0.001514	0.299417	0.287329	FALSE	FALSE	FALSE	ieu-a-7	13	107555235	0.0103837	184305	0.884075	Coronary heart disease || id:ieu-a-7	Coronary heart disease	Coronary heart disease || ||	TRUE	igd	13	106902887	0.0184498	8.79046e-06	GCST90199643	Glycodeoxycholate levels	6877	2	TRUE			0.00286561	6877	1.15349e-07	184305	TRUE	1.4625e-05	0.00282153	19.4529	29.788	19.7577
rs113666924	A	G	A	G	-0.199128	0.027411	0.0343297	0.039324	FALSE	FALSE	FALSE	ieu-a-7	22	41242018	0.0277957	184305	0.324054	Coronary heart disease || id:ieu-a-7	Coronary heart disease	Coronary heart disease || ||	TRUE	igd	22	40846014	0.043086	3.80707e-06	GCST90199644	Theobromine levels	8137	2	TRUE			0.00261876	8137	5.27667e-06	184305	TRUE	1.57514e-05	0.00262902	21.4434	29.788	21.3596
rs115810418	T	A	T	A	0.173537	-0.031387	0.0458835	0.044791	FALSE	TRUE	FALSE	ieu-a-7	2	105943866	0.0229302	184305	0.171061	Coronary heart disease || id:ieu-a-7	Coronary heart disease	Coronary heart disease || ||	TRUE	igd	2	105327409	0.0370651	2.84155e-06	GCST90199644	Theobromine levels	8137	2	TRUE			0.00268737	8137	1.01659e-05	184305	TRUE	1.72206e-05	0.00263677	21.5068	29.788	21.9207
rs11653172	G	A	G	A	-0.0719812	0.006545	0.507309	0.502918	FALSE	FALSE	FALSE	ieu-a-7	17	12643276	0.0096777	184305	0.49885	Coronary heart disease || id:ieu-a-7	Coronary heart disease	Coronary heart disease || ||	TRUE	igd	17	12739959	0.0161773	8.6063e-06	GCST90199644	Theobromine levels	8137	2	TRUE			0.0024278	8137	2.48166e-06	184305	TRUE	2.51563e-05	0.00259009	21.1251	29.788	19.7982
rs11657948	A	G	A	G	0.119169	-0.015664	0.0951605	0.084398	FALSE	FALSE	FALSE	ieu-a-7	17	9071648	0.0196942	184305	0.426404	Coronary heart disease || id:ieu-a-7	Coronary heart disease	Coronary heart disease || ||	TRUE	igd	17	9168331	0.026931	9.6448e-06	GCST90199644	Theobromine levels	8137	2	TRUE			0.00240115	8137	3.43238e-06	184305	TRUE	3.11455e-05	0.0024456	19.9437	29.788	19.5804
rs117966480	C	A	C	A	-0.322677	-0.006361	0.0145231	0.020084	FALSE	FALSE	FALSE	ieu-a-7	9	129582226	0.0488336	184305	0.896362	Coronary heart disease || id:ieu-a-7	Coronary heart disease	Coronary heart disease || ||	TRUE	igd	9	126819947	0.0654721	8.28759e-07	GCST90199644	Theobromine levels	8137	2	TRUE			0.00297695	8137	9.20621e-08	184305	TRUE	1.63727e-06	0.00298038	24.3179	29.788	24.2898
rs12431055	T	C	T	C	0.128412	-0.006858	0.0798941	0.087755	FALSE	FALSE	FALSE	ieu-a-7	13	30213463	0.0164951	184305	0.677587	Coronary heart disease || id:ieu-a-7	Coronary heart disease	Coronary heart disease || ||	TRUE	igd	13	29639326	0.0287893	8.17999e-06	GCST90199644	Theobromine levels	8137	2	TRUE			0.00243967	8137	9.37891e-07	184305	TRUE	1.8892e-05	0.00242434	19.7699	29.788	19.8952
rs12549440	T	C	T	C	0.0794261	-0.010827	0.34769	0.386344	FALSE	FALSE	FALSE	ieu-a-7	8	123588611	0.0096364	184305	0.261202	Coronary heart disease || id:ieu-a-7	Coronary heart disease	Coronary heart disease || ||	TRUE	igd	8	122576372	0.0165038	1.48987e-06	GCST90199644	Theobromine levels	8137	2	TRUE			0.00283901	8137	6.84938e-06	184305	TRUE	7.59583e-06	0.00286156	23.3456	29.788	23.1611
rs13065149	T	G	T	G	-0.0774221	-0.013237	0.416893	0.4154	FALSE	FALSE	FALSE	ieu-a-7	3	176589128	0.0095907	184305	0.16753	Coronary heart disease || id:ieu-a-7	Coronary heart disease	Coronary heart disease || ||	TRUE	igd	3	176871340	0.0160933	1.50311e-06	GCST90199644	Theobromine levels	8137	2	TRUE			0.00283693	8137	1.03357e-05	184305	TRUE	9.78905e-06	0.00291429	23.777	29.788	23.1441
rs139776	T	C	T	C	-0.0834689	0.015533	0.332129	0.335391	FALSE	FALSE	FALSE	ieu-a-7	22	25313446	0.0098873	184305	0.116182	Coronary heart disease || id:ieu-a-7	Coronary heart disease	Coronary heart disease || ||	TRUE	igd	22	24917479	0.0169698	8.7129e-07	GCST90199644	Theobromine levels	8137	2	TRUE			0.00296516	8137	1.33911e-05	184305	TRUE	7.19175e-06	0.00309086	25.2221	29.788	24.1933
rs144661998	A	G	A	G	0.0958879	-0.003606	0.159529	0.159335	FALSE	FALSE	FALSE	ieu-a-7	10	107415093	0.013635	184305	0.79142	Coronary heart disease || id:ieu-a-7	Coronary heart disease	Coronary heart disease || ||	TRUE	igd	10	105655335	0.0213092	6.80036e-06	GCST90199644	Theobromine levels	8137	2	TRUE			0.00248288	8137	3.79497e-07	184305	TRUE	1.37861e-05	0.00246559	20.1071	29.788	20.2485
rs147824813	G	T	G	T	0.298848	-0.038797	0.0136067	0.013138	FALSE	FALSE	FALSE	ieu-a-7	10	129057635	0.0440844	184305	0.378826	Coronary heart disease || id:ieu-a-7	Coronary heart disease	Coronary heart disease || ||	TRUE	igd	10	127259371	0.0673004	8.9747e-06	GCST90199644	Theobromine levels	8137	2	TRUE			0.002418	8137	4.20235e-06	184305	TRUE	3.14515e-05	0.00239736	19.5494	29.788	19.7181
rs150576152	G	A	G	A	0.207064	0.004789	0.0301517	0.032607	FALSE	FALSE	FALSE	ieu-a-7	15	63144194	0.027057	184305	0.859511	Coronary heart disease || id:ieu-a-7	Coronary heart disease	Coronary heart disease || ||	TRUE	igd	15	62851995	0.0456525	5.7426e-06	GCST90199644	Theobromine levels	8137	2	TRUE			0.00252247	8137	1.6998e-07	184305	TRUE	1.08135e-05	0.00250758	20.4504	29.788	20.5722
rs2628473	C	G	C	G	0.0753681	-0.021614	0.306775	0.29911	FALSE	TRUE	FALSE	ieu-a-7	2	89109772	0.0105249	184305	0.0400147	Coronary heart disease || id:ieu-a-7	Coronary heart disease	Coronary heart disease || ||	TRUE	igd	2	88810258	0.0169935	9.20294e-06	GCST90199644	Theobromine levels	8137	2	TRUE			0.00241214	8137	2.28819e-05	184305	TRUE	8.99744e-05	0.00241601	19.7019	29.788	19.6702
rs35155698	C	T	C	T	0.0750576	0.00541	0.300798	0.297562	FALSE	FALSE	FALSE	ieu-a-7	3	936987	0.0107237	184305	0.613919	Coronary heart disease || id:ieu-a-7	Coronary heart disease	Coronary heart disease || ||	TRUE	igd	3	895304	0.0169732	9.77406e-06	GCST90199644	Theobromine levels	8137	2	TRUE			0.00239807	8137	1.38093e-06	184305	TRUE	2.42209e-05	0.00236972	19.3235	29.788	19.5552
rs56113850	C	T	C	T	-0.105914	-0.005893	0.576193	0.521187	FALSE	FALSE	FALSE	ieu-a-7	19	41353107	0.0113668	184305	0.604152	Coronary heart disease || id:ieu-a-7	Coronary heart disease	Coronary heart disease || ||	TRUE	igd	19	40847202	0.0155754	1.04562e-11	GCST90199644	Theobromine levels	8137	2	TRUE			0.00565209	8137	1.45836e-06	184305	TRUE	6.08922e-11	0.00547864	44.8143	29.788	46.2411
rs62205691	A	G	A	G	-0.282897	0.051294	0.0153181	0.012681	FALSE	FALSE	FALSE	ieu-a-7	20	55816281	0.0522869	184305	0.326588	Coronary heart disease || id:ieu-a-7	Coronary heart disease	Coronary heart disease || ||	TRUE	igd	20	57241225	0.0634126	8.15002e-06	GCST90199644	Theobromine levels	8137	2	TRUE			0.00244054	8137	5.22171e-06	184305	TRUE	3.15232e-05	0.00241428	19.6877	29.788	19.9024
rs62462718	A	G	A	G	-0.0777005	-0.009	0.317824	0.238806	FALSE	FALSE	FALSE	ieu-a-7	7	63292398	0.0158271	184305	0.569596	Coronary heart disease || id:ieu-a-7	Coronary heart disease	Coronary heart disease || ||	TRUE	igd	7	63832020	0.0173769	7.76761e-06	GCST90199644	Theobromine levels	8137	2	TRUE			0.00245177	8137	1.75448e-06	184305	TRUE	2.07196e-05	0.00261795	21.3529	29.788	19.9942
rs6497692	T	C	T	C	0.0748062	0.014697	0.431385	0.457038	FALSE	FALSE	FALSE	ieu-a-7	16	23879382	0.0093235	184305	0.114949	Coronary heart disease || id:ieu-a-7	Coronary heart disease	Coronary heart disease || ||	TRUE	igd	16	23868061	0.0156289	1.69789e-06	GCST90199644	Theobromine levels	8137	2	TRUE			0.00280827	8137	1.34822e-05	184305	TRUE	1.31505e-05	0.00274529	22.3944	29.788	22.9096
rs6569661	G	A	G	A	-0.0859588	0.010167	0.726404	0.688996	FALSE	FALSE	FALSE	ieu-a-7	6	130506764	0.0110181	184305	0.356136	Coronary heart disease || id:ieu-a-7	Coronary heart disease	Coronary heart disease || ||	TRUE	igd	6	130185619	0.0178126	1.39498e-06	GCST90199644	Theobromine levels	8137	2	TRUE			0.00285448	8137	4.61996e-06	184305	TRUE	5.88753e-06	0.00293696	23.9626	29.788	23.2877
rs6669746	A	G	A	G	0.0701676	0.010378	0.483722	0.463327	FALSE	FALSE	FALSE	ieu-a-7	1	15353767	0.009367	184305	0.26789	Coronary heart disease || id:ieu-a-7	Coronary heart disease	Coronary heart disease || ||	TRUE	igd	1	15027271	0.0154489	5.57445e-06	GCST90199644	Theobromine levels	8137	2	TRUE			0.00252942	8137	6.66026e-06	184305	TRUE	2.49826e-05	0.00245914	20.0544	29.788	20.629
rs6878843	T	G	T	G	0.11814	-0.006761	0.0981603	0.131462	FALSE	FALSE	FALSE	ieu-a-7	5	103167572	0.0138479	184305	0.625384	Coronary heart disease || id:ieu-a-7	Coronary heart disease	Coronary heart disease || ||	TRUE	igd	5	103831871	0.0259449	5.27622e-06	GCST90199644	Theobromine levels	8137	2	TRUE			0.0025423	8137	1.29336e-06	184305	TRUE	1.33871e-05	0.00247109	20.1521	29.788	20.7343
rs72870405	A	T	A	T	-0.15323	-0.001459	0.0614672	0.093746	FALSE	TRUE	FALSE	ieu-a-7	2	162937083	0.0166494	184305	0.93017	Coronary heart disease || id:ieu-a-7	Coronary heart disease	Coronary heart disease || ||	TRUE	igd	2	162080573	0.0326215	2.63736e-06	GCST90199644	Theobromine levels	8137	2	TRUE			0.00270487	8137	4.16659e-08	184305	TRUE	4.7284e-06	0.00270901	22.0977	29.788	22.0638
rs7485735	C	T	C	T	-0.0794824	0.001357	0.686925	0.721233	FALSE	FALSE	FALSE	ieu-a-7	12	71719517	0.0112484	184305	0.903977	Coronary heart disease || id:ieu-a-7	Coronary heart disease	Coronary heart disease || ||	TRUE	igd	12	71325737	0.0175283	5.77336e-06	GCST90199644	Theobromine levels	8137	2	TRUE			0.00252121	8137	7.8967e-08	184305	TRUE	1.03033e-05	0.00271725	22.1651	29.788	20.5619
rs79880362	T	C	T	C	0.146943	0.004556	0.0745231	0.092174	FALSE	FALSE	FALSE	ieu-a-7	4	126123188	0.0153926	184305	0.76724	Coronary heart disease || id:ieu-a-7	Coronary heart disease	Coronary heart disease || ||	TRUE	igd	4	125202033	0.0295016	6.33111e-07	GCST90199644	Theobromine levels	8137	2	TRUE			0.00304037	8137	4.75347e-07	184305	TRUE	1.50313e-06	0.00297841	24.3017	29.788	24.8089
rs114371828	T	C	T	C	-0.267108	-0.029987	0.0166605	0.022786	FALSE	FALSE	FALSE	ieu-a-7	1	201958268	0.032156	184305	0.351053	Coronary heart disease || id:ieu-a-7	Coronary heart disease	Coronary heart disease || ||	TRUE	igd	1	201989140	0.0601557	8.98427e-06	GCST90199645	Quinate levels	8200	2	TRUE			0.00239921	8200	4.71854e-06	184305	TRUE	3.3208e-05	0.00233774	19.2097	29.788	19.7161
rs115520044	A	G	A	G	0.330168	0.071419	0.0166095	0.031174	FALSE	FALSE	FALSE	ieu-a-7	14	49955007	0.0304223	184305	0.0188956	Coronary heart disease || id:ieu-a-7	Coronary heart disease	Coronary heart disease || ||	TRUE	igd	14	49488289	0.0606751	5.28093e-08	GCST90199645	Quinate levels	8200	2	TRUE			0.00359895	8200	2.99018e-05	184305	TRUE	1.32145e-06	0.00356109	29.2981	29.788	29.6107
rs116020639	C	T	C	T	-0.316022	-0.013144	0.0157528	0.014815	FALSE	FALSE	FALSE	ieu-a-7	2	65107483	0.059263	184305	0.824477	Coronary heart disease || id:ieu-a-7	Coronary heart disease	Coronary heart disease || ||	TRUE	igd	2	64880349	0.0623683	4.04057e-07	GCST90199645	Quinate levels	8200	2	TRUE			0.00312206	8200	2.66904e-07	184305	TRUE	9.1393e-07	0.0030969	25.4672	29.788	25.6748
rs140759816	A	T	A	T	-0.186302	-0.022077	0.0375843	0.037084	FALSE	TRUE	FALSE	ieu-a-7	5	16902795	0.0254841	184305	0.386322	Coronary heart disease || id:ieu-a-7	Coronary heart disease	Coronary heart disease || ||	TRUE	igd	5	16902686	0.0405924	4.44137e-06	GCST90199645	Quinate levels	8200	2	TRUE			0.00256285	8200	4.072e-06	184305	TRUE	1.63374e-05	0.00251093	20.6364	29.788	21.0642
rs145444661	T	C	T	C	-0.329336	0.095612	0.0131884	0.012227	FALSE	FALSE	FALSE	ieu-a-7	18	40717572	0.0515613	184305	0.0636913	Coronary heart disease || id:ieu-a-7	Coronary heart disease	Coronary heart disease || ||	TRUE	igd	18	43137607	0.0679412	1.25107e-06	GCST90199645	Quinate levels	8200	2	TRUE			0.00285799	8200	1.86568e-05	184305	TRUE	1.31352e-05	0.00282316	23.2098	29.788	23.497
rs1594297	A	G	A	G	0.224925	-0.029179	0.974516	0.962627	FALSE	FALSE	FALSE	ieu-a-7	2	16658244	0.0367488	184305	0.427188	Coronary heart disease || id:ieu-a-7	Coronary heart disease	Coronary heart disease || ||	TRUE	igd	2	16476976	0.0505211	8.50366e-06	GCST90199645	Quinate levels	8200	2	TRUE			0.00241198	8200	3.42074e-06	184305	TRUE	2.78447e-05	0.00251282	20.652	29.788	19.8212
rs186185553	T	C	T	C	-0.255397	-0.052095	0.0190144	0.020981	FALSE	FALSE	FALSE	ieu-a-7	11	57711613	0.0426017	184305	0.22139	Coronary heart disease || id:ieu-a-7	Coronary heart disease	Coronary heart disease || ||	TRUE	igd	11	57944141	0.0568661	7.08223e-06	GCST90199645	Quinate levels	8200	2	TRUE			0.00245442	8200	8.11339e-06	184305	TRUE	3.47106e-05	0.00243336	19.9974	29.788	20.1709
rs2108740	A	C	A	C	-0.169235	0.010576	0.0446539	0.044406	FALSE	FALSE	FALSE	ieu-a-7	17	13779370	0.0237754	184305	0.656443	Coronary heart disease || id:ieu-a-7	Coronary heart disease	Coronary heart disease || ||	TRUE	igd	17	13876053	0.0373631	5.91354e-06	GCST90199645	Quinate levels	8200	2	TRUE			0.00249633	8200	1.07363e-06	184305	TRUE	1.43737e-05	0.0024436	20.0817	29.788	20.5161
rs34099891	T	G	T	G	-0.0824109	-0.012155	0.26108	0.243913	FALSE	FALSE	FALSE	ieu-a-7	5	60138339	0.0111018	184305	0.273573	Coronary heart disease || id:ieu-a-7	Coronary heart disease	Coronary heart disease || ||	TRUE	igd	5	60842512	0.0174244	2.24925e-06	GCST90199645	Quinate levels	8200	2	TRUE			0.00272121	8200	6.50411e-06	184305	TRUE	1.08491e-05	0.00262042	21.5386	29.788	22.3694
rs4148714	C	A	C	A	-0.125867	0.016669	0.0913027	0.115583	FALSE	FALSE	FALSE	ieu-a-7	7	117238453	0.0145127	184305	0.250728	Coronary heart disease || id:ieu-a-7	Coronary heart disease	Coronary heart disease || ||	TRUE	igd	7	117598399	0.027082	3.35762e-06	GCST90199645	Quinate levels	8200	2	TRUE			0.00262792	8200	7.15793e-06	184305	TRUE	1.64506e-05	0.00262879	21.6077	29.788	21.6004
rs553719	C	T	C	T	0.147306	-0.014428	0.937921	0.90016	FALSE	FALSE	FALSE	ieu-a-7	1	37332937	0.0214008	184305	0.500196	Coronary heart disease || id:ieu-a-7	Coronary heart disease	Coronary heart disease || ||	TRUE	igd	1	36867336	0.0328968	7.54079e-06	GCST90199645	Quinate levels	8200	2	TRUE			0.00243986	8200	2.46615e-06	184305	TRUE	2.23245e-05	0.00252686	20.7677	29.788	20.0509
rs5997787	C	T	C	T	0.0735554	-0.00714	0.55684	0.553983	FALSE	FALSE	FALSE	ieu-a-7	22	31254954	0.0095973	184305	0.4569	Coronary heart disease || id:ieu-a-7	Coronary heart disease	Coronary heart disease || ||	TRUE	igd	22	30858967	0.0159581	4.04072e-06	GCST90199645	Quinate levels	8200	2	TRUE			0.00258485	8200	3.00306e-06	184305	TRUE	1.33469e-05	0.00267024	21.9492	29.788	21.2455
rs62027288	C	T	C	T	0.0759955	-0.00088	0.460441	0.367584	FALSE	FALSE	FALSE	ieu-a-7	15	75434747	0.0105532	184305	0.933544	Coronary heart disease || id:ieu-a-7	Coronary heart disease	Coronary heart disease || ||	TRUE	igd	15	75142406	0.0156247	1.15144e-06	GCST90199645	Quinate levels	8200	2	TRUE			0.00287735	8200	3.77281e-08	184305	TRUE	2.14415e-06	0.00286958	23.5925	29.788	23.6566
rs73202647	C	T	C	T	-0.109072	0.011046	0.121515	0.106542	FALSE	FALSE	FALSE	ieu-a-7	8	12604438	0.0162735	184305	0.497283	Coronary heart disease || id:ieu-a-7	Coronary heart disease	Coronary heart disease || ||	TRUE	igd	8	12746929	0.0238233	4.68646e-06	GCST90199645	Quinate levels	8200	2	TRUE			0.00255039	8200	2.49985e-06	184305	TRUE	1.44054e-05	0.00253992	20.8753	29.788	20.9615
rs73328382	A	C	A	C	-0.490215	0.017276	0.00586941	0.032734	FALSE	FALSE	FALSE	ieu-a-7	10	101182508	0.0278554	184305	0.535125	Coronary heart disease || id:ieu-a-7	Coronary heart disease	Coronary heart disease || ||	TRUE	igd	10	99422751	0.101636	1.41227e-06	GCST90199645	Quinate levels	8200	2	TRUE			0.00282969	8200	2.08706e-06	184305	TRUE	4.45513e-06	0.00280441	23.0552	29.788	23.2637
rs76051019	A	G	A	G	-0.23203	-0.004606	0.0258336	0.02184	FALSE	FALSE	FALSE	ieu-a-7	21	34522358	0.0328675	184305	0.888551	Coronary heart disease || id:ieu-a-7	Coronary heart disease	Coronary heart disease || ||	TRUE	igd	21	33150052	0.0487058	1.89885e-06	GCST90199645	Quinate levels	8200	2	TRUE			0.00276069	8200	1.06557e-07	184305	TRUE	3.65618e-06	0.00270979	22.2753	29.788	22.6948
rs77082173	T	C	T	C	0.201076	-0.017598	0.030454	0.027167	FALSE	FALSE	FALSE	ieu-a-7	6	6132855	0.0315129	184305	0.576546	Coronary heart disease || id:ieu-a-7	Coronary heart disease	Coronary heart disease || ||	TRUE	igd	6	6132622	0.0453441	9.23095e-06	GCST90199645	Quinate levels	8200	2	TRUE			0.00239293	8200	1.69206e-06	184305	TRUE	2.42388e-05	0.00238761	19.6205	29.788	19.6643
rs10097464	C	T	C	T	-0.0715199	0.015916	0.441401	0.473627	FALSE	FALSE	FALSE	ieu-a-7	8	136785518	0.0094789	184305	0.0931322	Coronary heart disease || id:ieu-a-7	Coronary heart disease	Coronary heart disease || ||	TRUE	igd	8	135773275	0.015626	4.71698e-06	GCST90199646	Gentisate levels	8013	2	TRUE			0.00260818	8013	1.52972e-05	184305	TRUE	3.53812e-05	0.00252242	20.2582	29.788	20.9488
rs1010664	C	T	C	T	0.200004	-0.026091	0.0324447	0.031861	FALSE	FALSE	FALSE	ieu-a-7	10	14965687	0.0269516	184305	0.333011	Coronary heart disease || id:ieu-a-7	Coronary heart disease	Coronary heart disease || ||	TRUE	igd	10	14923688	0.0431905	3.64356e-06	GCST90199646	Gentisate levels	8013	2	TRUE			0.00266964	8013	5.08485e-06	184305	TRUE	1.4682e-05	0.00251146	20.17	29.788	21.4438
rs10153505	G	T	G	T	-0.109387	0.011978	0.854558	0.884993	FALSE	FALSE	FALSE	ieu-a-7	19	652948	0.0199549	184305	0.548338	Coronary heart disease || id:ieu-a-7	Coronary heart disease	Coronary heart disease || ||	TRUE	igd	19	652948	0.02296	1.89575e-06	GCST90199646	Gentisate levels	8013	2	TRUE			0.00282535	8013	1.95495e-06	184305	TRUE	5.65282e-06	0.00297435	23.8986	29.788	22.698
rs1041350	C	T	C	T	0.0994006	-0.009428	0.162725	0.173076	FALSE	FALSE	FALSE	ieu-a-7	9	23613593	0.0123064	184305	0.443615	Coronary heart disease || id:ieu-a-7	Coronary heart disease	Coronary heart disease || ||	TRUE	igd	9	23613595	0.0208627	1.8932e-06	GCST90199646	Gentisate levels	8013	2	TRUE			0.00282567	8013	3.18452e-06	184305	TRUE	6.62505e-06	0.00269234	21.6266	29.788	22.7006
rs12471344	A	G	A	G	-0.204526	-0.012435	0.0351109	0.058509	FALSE	FALSE	FALSE	ieu-a-7	2	155116318	0.0253233	184305	0.623392	Coronary heart disease || id:ieu-a-7	Coronary heart disease	Coronary heart disease || ||	TRUE	igd	2	154259805	0.0425454	1.53017e-06	GCST90199646	Gentisate levels	8013	2	TRUE			0.00287643	8013	1.30833e-06	184305	TRUE	4.15861e-06	0.0028343	22.7701	29.788	23.1096
rs147503040	A	G	A	G	0.240882	-0.044827	0.0254653	0.026927	FALSE	FALSE	FALSE	ieu-a-7	3	182515294	0.0327556	184305	0.171147	Coronary heart disease || id:ieu-a-7	Coronary heart disease	Coronary heart disease || ||	TRUE	igd	3	182797506	0.0486921	7.53505e-07	GCST90199646	Gentisate levels	8013	2	TRUE			0.00304565	8013	1.01618e-05	184305	TRUE	5.09437e-06	0.00287995	23.1379	29.788	24.4733
rs187258635	T	C	T	C	-0.236251	0.070227	0.0215081	0.021022	FALSE	FALSE	FALSE	ieu-a-7	1	207836465	0.0441681	184305	0.111836	Coronary heart disease || id:ieu-a-7	Coronary heart disease	Coronary heart disease || ||	TRUE	igd	1	207663120	0.0532573	9.16358e-06	GCST90199646	Gentisate levels	8013	2	TRUE			0.0024504	8013	1.37168e-05	184305	TRUE	5.9163e-05	0.00234929	18.8645	29.788	19.6784
rs2833465	T	C	T	C	-0.110209	0.011493	0.12614	0.184951	FALSE	FALSE	FALSE	ieu-a-7	21	32964103	0.0121859	184305	0.345608	Coronary heart disease || id:ieu-a-7	Coronary heart disease	Coronary heart disease || ||	TRUE	igd	21	31591790	0.023061	1.76156e-06	GCST90199646	Gentisate levels	8013	2	TRUE			0.00284286	8013	4.82633e-06	184305	TRUE	7.34479e-06	0.00267768	21.5085	29.788	22.839
rs367715	G	A	G	A	0.0721685	0.007306	0.348675	0.333756	FALSE	FALSE	FALSE	ieu-a-7	20	45116181	0.0097732	184305	0.45473	Coronary heart disease || id:ieu-a-7	Coronary heart disease	Coronary heart disease || ||	TRUE	igd	20	46487542	0.0160673	7.0676e-06	GCST90199646	Gentisate levels	8013	2	TRUE			0.00251206	8013	3.03216e-06	184305	TRUE	2.21122e-05	0.00236561	18.9959	29.788	20.1748
rs3861695	T	C	T	C	-0.0760413	0.007168	0.683305	0.697286	FALSE	FALSE	FALSE	ieu-a-7	1	83972169	0.0106086	184305	0.499244	Coronary heart disease || id:ieu-a-7	Coronary heart disease	Coronary heart disease || ||	TRUE	igd	1	83506486	0.0169127	6.92059e-06	GCST90199646	Gentisate levels	8013	2	TRUE			0.00251705	8013	2.47712e-06	184305	TRUE	2.03098e-05	0.00250256	20.0983	29.788	20.215
rs522708	G	A	G	A	-0.0822705	-0.016677	0.283475	0.273588	FALSE	FALSE	FALSE	ieu-a-7	1	96483045	0.0103946	184305	0.108628	Coronary heart disease || id:ieu-a-7	Coronary heart disease	Coronary heart disease || ||	TRUE	igd	1	96017489	0.0169917	1.28672e-06	GCST90199646	Gentisate levels	8013	2	TRUE			0.00291782	8013	1.39663e-05	184305	TRUE	1.03436e-05	0.00274957	22.0875	29.788	23.4431
rs6010005	C	G	C	G	0.229928	-0.007609	0.0237352	0.036777	FALSE	TRUE	FALSE	ieu-a-7	22	50997119	0.0261174	184305	0.770792	Coronary heart disease || id:ieu-a-7	Coronary heart disease	Coronary heart disease || ||	TRUE	igd	22	50558690	0.05	4.25419e-06	GCST90199646	Gentisate levels	8013	2	TRUE			0.00263276	8013	4.60535e-07	184305	TRUE	8.9935e-06	0.00245005	19.6755	29.788	21.1468
rs62621664	T	G	T	G	0.265359	0.017106	0.0182409	0.013737	FALSE	FALSE	FALSE	ieu-a-7	6	24505196	0.0599506	184305	0.775388	Coronary heart disease || id:ieu-a-7	Coronary heart disease	Coronary heart disease || ||	TRUE	igd	6	24504968	0.0575444	4.00005e-06	GCST90199646	Gentisate levels	8013	2	TRUE			0.00264742	8013	4.41751e-07	184305	TRUE	8.43584e-06	0.00252202	20.255	29.788	21.2648
rs72645867	A	G	A	G	0.162441	-0.027051	0.0602902	0.060807	FALSE	FALSE	FALSE	ieu-a-7	13	95966980	0.0244108	184305	0.267795	Coronary heart disease || id:ieu-a-7	Coronary heart disease	Coronary heart disease || ||	TRUE	igd	13	95314726	0.0331451	9.53955e-07	GCST90199646	Gentisate levels	8013	2	TRUE			0.00298927	8013	6.66296e-06	184305	TRUE	4.90281e-06	0.00298994	24.0242	29.788	24.0189
rs72824920	C	T	C	T	0.192917	0.02856	0.0442895	0.039797	FALSE	FALSE	FALSE	ieu-a-7	2	50572907	0.0291829	184305	0.327749	Coronary heart disease || id:ieu-a-7	Coronary heart disease	Coronary heart disease || ||	TRUE	igd	2	50345769	0.0371937	2.13916e-07	GCST90199646	Gentisate levels	8013	2	TRUE			0.00334703	8013	5.19667e-06	184305	TRUE	1.08936e-06	0.00315064	25.3195	29.788	26.9031
rs72950259	G	T	G	T	0.409958	0.102983	0.00712767	0.008652	FALSE	FALSE	FALSE	ieu-a-7	2	215891411	0.0632116	184305	0.103275	Coronary heart disease || id:ieu-a-7	Coronary heart disease	Coronary heart disease || ||	TRUE	igd	2	215026687	0.0917044	7.80613e-06	GCST90199646	Gentisate levels	8013	2	TRUE			0.00248845	8013	1.44012e-05	184305	TRUE	5.30519e-05	0.00237876	19.1016	29.788	19.9847
rs73217253	A	G	A	G	-0.160981	-0.030488	0.0584083	0.048863	FALSE	FALSE	FALSE	ieu-a-7	3	133591578	0.0251767	184305	0.22591	Coronary heart disease || id:ieu-a-7	Coronary heart disease	Coronary heart disease || ||	TRUE	igd	3	133872734	0.0328036	9.2284e-07	GCST90199646	Gentisate levels	8013	2	TRUE			0.0029972	8013	7.95654e-06	184305	TRUE	5.25629e-06	0.00285047	22.9004	29.788	24.0828
rs75476920	C	T	C	T	-0.0942693	-0.03736	0.15625	0.130294	FALSE	FALSE	FALSE	ieu-a-7	17	40216465	0.015083	184305	0.0132504	Coronary heart disease || id:ieu-a-7	Coronary heart disease	Coronary heart disease || ||	TRUE	igd	17	42064447	0.0212045	8.75949e-06	GCST90199646	Gentisate levels	8013	2	TRUE			0.00246109	8013	3.32883e-05	184305	TRUE	0.000120757	0.00234317	18.8152	29.788	19.7644
rs76930336	A	C	A	C	-0.202699	-0.032947	0.0324797	0.041065	FALSE	FALSE	FALSE	ieu-a-7	11	118464764	0.0318421	184305	0.300809	Coronary heart disease || id:ieu-a-7	Coronary heart disease	Coronary heart disease || ||	TRUE	igd	11	118594049	0.0432874	2.83225e-06	GCST90199646	Gentisate levels	8013	2	TRUE			0.00272965	8013	5.80889e-06	184305	TRUE	1.23942e-05	0.00258229	20.7403	29.788	21.9271
rs77091748	T	C	T	C	0.25787	-0.008918	0.0181761	0.020413	FALSE	FALSE	FALSE	ieu-a-7	11	78891610	0.0416946	184305	0.830634	Coronary heart disease || id:ieu-a-7	Coronary heart disease	Coronary heart disease || ||	TRUE	igd	11	79180565	0.0580381	8.86671e-06	GCST90199646	Gentisate levels	8013	2	TRUE			0.00245821	8013	2.48223e-07	184305	TRUE	1.67822e-05	0.00237337	19.0583	29.788	19.7413
rs77380220	A	G	A	G	0.222387	-0.052118	0.0258828	0.029359	FALSE	FALSE	FALSE	ieu-a-7	3	71009023	0.0339505	184305	0.124755	Coronary heart disease || id:ieu-a-7	Coronary heart disease	Coronary heart disease || ||	TRUE	igd	3	70959872	0.0486142	4.77297e-06	GCST90199646	Gentisate levels	8013	2	TRUE			0.00260539	8013	1.27863e-05	184305	TRUE	3.1447e-05	0.00249386	20.0282	29.788	20.9263
rs9572022	G	A	G	A	-0.0758655	0.0193	0.568464	0.584702	FALSE	FALSE	FALSE	ieu-a-7	13	69386098	0.0097624	184305	0.0480441	Coronary heart disease || id:ieu-a-7	Coronary heart disease	Coronary heart disease || ||	TRUE	igd	13	68811966	0.0155994	1.154e-06	GCST90199646	Gentisate levels	8013	2	TRUE			0.00294378	8013	2.12061e-05	184305	TRUE	1.33131e-05	0.00282383	22.6858	29.788	23.6523
rs9959080	A	G	A	G	-0.0926697	-0.003749	0.807333	0.797623	FALSE	FALSE	FALSE	ieu-a-7	18	57100768	0.0124401	184305	0.763136	Coronary heart disease || id:ieu-a-7	Coronary heart disease	Coronary heart disease || ||	TRUE	igd	18	59433536	0.0194371	1.86358e-06	GCST90199646	Gentisate levels	8013	2	TRUE			0.00282941	8013	4.92777e-07	184305	TRUE	4.15796e-06	0.00267156	21.4592	29.788	22.7307
rs10902695	T	C	T	C	-0.0834655	0.003676	0.274212	0.264192	FALSE	FALSE	FALSE	ieu-a-7	1	28645533	0.0107694	184305	0.732848	Coronary heart disease || id:ieu-a-7	Coronary heart disease	Coronary heart disease || ||	TRUE	igd	1	28319022	0.018084	3.9229e-06	GCST90199647	Theophylline levels	7822	2	TRUE			0.00271667	7822	6.32172e-07	184305	TRUE	8.61352e-06	0.00277294	21.7447	29.788	21.3022
rs114110478	C	G	C	G	0.142487	0.003351	0.0759902	0.073334	FALSE	TRUE	FALSE	ieu-a-7	3	60424982	0.0186883	184305	0.857694	Coronary heart disease || id:ieu-a-7	Coronary heart disease	Coronary heart disease || ||	TRUE	igd	3	60439249	0.0303158	2.60048e-06	GCST90199647	Theophylline levels	7822	2	TRUE			0.00281696	7822	1.74452e-07	184305	TRUE	4.99919e-06	0.00285111	22.3595	29.788	22.0908
rs115520044	A	G	A	G	0.322722	0.071419	0.016898	0.031174	FALSE	FALSE	FALSE	ieu-a-7	14	49955007	0.0304223	184305	0.0188956	Coronary heart disease || id:ieu-a-7	Coronary heart disease	Coronary heart disease || ||	TRUE	igd	14	49488289	0.0619626	1.90536e-07	GCST90199647	Theophylline levels	7822	2	TRUE			0.0034569	7822	2.99018e-05	184305	TRUE	3.75713e-06	0.00346036	27.154	29.788	27.1268
rs116572946	T	C	T	C	-0.278367	0.012351	0.0176742	0.022577	FALSE	FALSE	FALSE	ieu-a-7	13	60655043	0.031149	184305	0.691726	Coronary heart disease || id:ieu-a-7	Coronary heart disease	Coronary heart disease || ||	TRUE	igd	13	60080909	0.060805	4.694e-06	GCST90199647	Theophylline levels	7822	2	TRUE			0.00267293	7822	8.53067e-07	184305	TRUE	1.07444e-05	0.00269067	21.0978	29.788	20.9583
rs116926604	C	T	C	T	-0.276332	-0.050403	0.0187757	0.018628	FALSE	FALSE	FALSE	ieu-a-7	7	86545395	0.0386813	184305	0.192563	Coronary heart disease || id:ieu-a-7	Coronary heart disease	Coronary heart disease || ||	TRUE	igd	7	86916079	0.0591917	3.03525e-06	GCST90199647	Theophylline levels	7822	2	TRUE			0.00277924	7822	9.21243e-06	184305	TRUE	1.65367e-05	0.00281356	22.0641	29.788	21.7942
rs12259905	T	C	T	C	0.155223	-0.003319	0.0731332	0.072888	FALSE	FALSE	FALSE	ieu-a-7	10	29209423	0.0180203	184305	0.853871	Coronary heart disease || id:ieu-a-7	Coronary heart disease	Coronary heart disease || ||	TRUE	igd	10	28920494	0.0305894	3.88709e-07	GCST90199647	Theophylline levels	7822	2	TRUE			0.00328198	7822	1.84059e-07	184305	TRUE	8.22822e-07	0.00326644	25.6272	29.788	25.7496
rs1388182	T	C	T	C	-0.155876	0.015466	0.0561395	0.053013	FALSE	FALSE	FALSE	ieu-a-7	2	180150435	0.0232626	184305	0.506151	Coronary heart disease || id:ieu-a-7	Coronary heart disease	Coronary heart disease || ||	TRUE	igd	2	179285708	0.0349153	8.02918e-06	GCST90199647	Theophylline levels	7822	2	TRUE			0.00254223	7822	2.39831e-06	184305	TRUE	2.27178e-05	0.00257493	20.1879	29.788	19.9309
rs149370966	A	G	A	G	-0.270438	-0.074645	0.0180128	0.016143	FALSE	FALSE	FALSE	ieu-a-7	20	38351302	0.0422236	184305	0.0770868	Coronary heart disease || id:ieu-a-7	Coronary heart disease	Coronary heart disease || ||	TRUE	igd	20	39722660	0.0600696	6.72911e-06	GCST90199647	Theophylline levels	7822	2	TRUE			0.00258521	7822	1.69571e-05	184305	TRUE	5.10675e-05	0.00258733	20.2854	29.788	20.2687
rs17428030	G	A	G	A	0.136372	-0.022357	0.0811424	0.083618	FALSE	FALSE	FALSE	ieu-a-7	9	86953621	0.0187209	184305	0.23239	Coronary heart disease || id:ieu-a-7	Coronary heart disease	Coronary heart disease || ||	TRUE	igd	9	84338706	0.0301283	5.99992e-06	GCST90199647	Theophylline levels	7822	2	TRUE			0.00261311	7822	7.73816e-06	184305	TRUE	2.78741e-05	0.00277317	21.7465	29.788	20.4881
rs2245730	C	A	C	A	-0.0787472	0.00117	0.435058	0.479761	FALSE	FALSE	FALSE	ieu-a-7	21	44125328	0.0095245	184305	0.902233	Coronary heart disease || id:ieu-a-7	Coronary heart disease	Coronary heart disease || ||	TRUE	igd	21	42705218	0.0162537	1.26685e-06	GCST90199647	Theophylline levels	7822	2	TRUE			0.00299266	7822	8.18757e-08	184305	TRUE	2.38398e-06	0.00304825	23.9102	29.788	23.4728
rs258831	G	C	G	C	-0.0982197	0.015807	0.172656	0.202663	FALSE	TRUE	FALSE	ieu-a-7	5	11415197	0.0129202	184305	0.221166	Coronary heart disease || id:ieu-a-7	Coronary heart disease	Coronary heart disease || ||	TRUE	igd	5	11415085	0.0220943	8.76968e-06	GCST90199647	Theophylline levels	7822	2	TRUE			0.00252077	7822	8.12128e-06	184305	TRUE	4.04047e-05	0.0027561	21.6123	29.788	19.7623
rs34804482	C	T	C	T	-0.242551	-0.00464	0.0234865	0.022094	FALSE	FALSE	FALSE	ieu-a-7	11	27389739	0.0405486	184305	0.908896	Coronary heart disease || id:ieu-a-7	Coronary heart disease	Coronary heart disease || ||	TRUE	igd	11	27368192	0.0527985	4.35018e-06	GCST90199647	Theophylline levels	7822	2	TRUE			0.00269145	7822	7.1048e-08	184305	TRUE	7.67508e-06	0.00269856	21.1599	29.788	21.1039
rs4615950	T	C	T	C	-0.0738501	0.007051	0.399028	0.405345	FALSE	FALSE	FALSE	ieu-a-7	10	107770280	0.0093811	184305	0.452281	Coronary heart disease || id:ieu-a-7	Coronary heart disease	Coronary heart disease || ||	TRUE	igd	10	106010522	0.0164924	7.54096e-06	GCST90199647	Theophylline levels	7822	2	TRUE			0.0025575	7822	3.06521e-06	184305	TRUE	2.31645e-05	0.00261571	20.5085	29.788	20.0509
rs643104	C	T	C	T	-0.0815481	0.005161	0.336783	0.318276	FALSE	FALSE	FALSE	ieu-a-7	11	118567125	0.0102197	184305	0.613556	Coronary heart disease || id:ieu-a-7	Coronary heart disease	Coronary heart disease || ||	TRUE	igd	11	118696416	0.017458	2.99589e-06	GCST90199647	Theophylline levels	7822	2	TRUE			0.00278241	7822	1.38375e-06	184305	TRUE	7.79399e-06	0.00297073	23.3003	29.788	21.8192
rs67360043	A	T	A	T	0.0886627	0.002365	0.210393	0.213021	FALSE	TRUE	FALSE	ieu-a-7	4	38939834	0.0115993	184305	0.838438	Coronary heart disease || id:ieu-a-7	Coronary heart disease	Coronary heart disease || ||	TRUE	igd	4	38938213	0.0196537	6.44475e-06	GCST90199647	Theophylline levels	7822	2	TRUE			0.00259572	7822	2.25562e-07	184305	TRUE	1.21341e-05	0.00261189	20.4784	29.788	20.3514
rs72793907	G	A	G	A	-0.274555	0.018107	0.0174664	0.023013	FALSE	FALSE	FALSE	ieu-a-7	2	22760858	0.0297923	184305	0.543337	Coronary heart disease || id:ieu-a-7	Coronary heart disease	Coronary heart disease || ||	TRUE	igd	2	22537986	0.0606691	6.02668e-06	GCST90199647	Theophylline levels	7822	2	TRUE			0.00261205	7822	2.00425e-06	184305	TRUE	1.65052e-05	0.00258726	20.2848	29.788	20.4797
rs7323950	G	A	G	A	-0.0792948	0.002054	0.669651	0.676623	FALSE	FALSE	FALSE	ieu-a-7	13	22773777	0.010224	184305	0.840778	Coronary heart disease || id:ieu-a-7	Coronary heart disease	Coronary heart disease || ||	TRUE	igd	13	22199638	0.0174912	5.80379e-06	GCST90199647	Theophylline levels	7822	2	TRUE			0.00262122	7822	2.18991e-07	184305	TRUE	1.09532e-05	0.0027819	21.8151	29.788	20.5518
rs74069834	G	A	G	A	-0.270594	0.031058	0.0173385	0.011941	FALSE	FALSE	FALSE	ieu-a-7	12	22099296	0.0579073	184305	0.591724	Coronary heart disease || id:ieu-a-7	Coronary heart disease	Coronary heart disease || ||	TRUE	igd	12	21946362	0.0611119	9.51795e-06	GCST90199647	Theophylline levels	7822	2	TRUE			0.00250087	7822	1.5608e-06	184305	TRUE	2.37335e-05	0.00249506	19.5602	29.788	19.6058
rs74526939	G	A	G	A	-0.20014	-0.029391	0.0338003	0.038471	FALSE	FALSE	FALSE	ieu-a-7	18	47599701	0.0248508	184305	0.236928	Coronary heart disease || id:ieu-a-7	Coronary heart disease	Coronary heart disease || ||	TRUE	igd	18	50073331	0.0441667	5.85782e-06	GCST90199647	Theophylline levels	7822	2	TRUE			0.00261898	7822	7.58948e-06	184305	TRUE	2.69901e-05	0.00261629	20.513	29.788	20.5342
rs75095637	C	A	C	A	0.140865	0.001846	0.0721271	0.106681	FALSE	FALSE	FALSE	ieu-a-7	15	25158591	0.0157456	184305	0.906671	Coronary heart disease || id:ieu-a-7	Coronary heart disease	Coronary heart disease || ||	TRUE	igd	15	24913444	0.0309814	5.44768e-06	GCST90199647	Theophylline levels	7822	2	TRUE			0.00263664	7822	7.45783e-08	184305	TRUE	9.53843e-06	0.00265597	20.825	29.788	20.673
rs75723819	A	C	A	C	-0.211336	-0.038442	0.0308404	0.030195	FALSE	FALSE	FALSE	ieu-a-7	3	119818032	0.0343807	184305	0.263512	Coronary heart disease || id:ieu-a-7	Coronary heart disease	Coronary heart disease || ||	TRUE	igd	3	120099185	0.0468234	6.37754e-06	GCST90199647	Theophylline levels	7822	2	TRUE			0.00259827	7822	6.7834e-06	184305	TRUE	2.75408e-05	0.00266988	20.9344	29.788	20.3714
rs75870478	T	C	T	C	-0.281468	0.043849	0.0183091	0.016455	FALSE	FALSE	FALSE	ieu-a-7	4	35565604	0.0521001	184305	0.399994	Coronary heart disease || id:ieu-a-7	Coronary heart disease	Coronary heart disease || ||	TRUE	igd	4	35563982	0.0600974	2.81969e-06	GCST90199647	Theophylline levels	7822	2	TRUE			0.0027972	7822	3.84333e-06	184305	TRUE	1.01005e-05	0.00284793	22.3344	29.788	21.9355
rs79361921	A	G	A	G	-0.232926	-0.007453	0.0295007	0.026207	FALSE	FALSE	FALSE	ieu-a-7	8	58934563	0.0375396	184305	0.842625	Coronary heart disease || id:ieu-a-7	Coronary heart disease	Coronary heart disease || ||	TRUE	igd	8	58022004	0.0470132	7.25218e-07	GCST90199647	Theophylline levels	7822	2	TRUE			0.00312916	7822	2.1387e-07	184305	TRUE	1.51145e-06	0.00310666	24.3698	29.788	24.5469
rs79542551	G	A	G	A	-0.328871	-0.009274	0.0127102	0.017359	FALSE	FALSE	FALSE	ieu-a-7	13	93724273	0.0400293	184305	0.816786	Coronary heart disease || id:ieu-a-7	Coronary heart disease	Coronary heart disease || ||	TRUE	igd	13	93072020	0.0716904	4.48836e-06	GCST90199647	Theophylline levels	7822	2	TRUE			0.00268383	7822	2.91236e-07	184305	TRUE	8.8293e-06	0.00271443	21.2846	29.788	21.044
rs10152997	C	T	C	T	-0.0762043	-0.010344	0.552011	0.532181	FALSE	FALSE	FALSE	ieu-a-7	15	61197157	0.0095734	184305	0.279921	Coronary heart disease || id:ieu-a-7	Coronary heart disease	Coronary heart disease || ||	TRUE	igd	15	60904958	0.0152829	6.15686e-07	GCST90199648	1,5-anhydroglucitol (1,5-ag) levels	8139	2	TRUE			0.0030462	8139	6.33446e-06	184305	TRUE	3.24369e-06	0.00287213	23.4378	29.788	24.8626
rs111517692	A	G	A	G	0.186098	0.036156	0.0399656	0.030378	FALSE	FALSE	FALSE	ieu-a-7	9	132816672	0.0314608	184305	0.250457	Coronary heart disease || id:ieu-a-7	Coronary heart disease	Coronary heart disease || ||	TRUE	igd	9	130054393	0.0389448	1.76596e-06	GCST90199648	1,5-anhydroglucitol (1,5-ag) levels	8139	2	TRUE			0.00279836	8139	7.16615e-06	184305	TRUE	9.09559e-06	0.00265758	21.6824	29.788	22.8341
rs112766573	T	C	T	C	0.149694	-0.025787	0.055333	0.051385	FALSE	FALSE	FALSE	ieu-a-7	6	75892252	0.0240176	184305	0.28297	Coronary heart disease || id:ieu-a-7	Coronary heart disease	Coronary heart disease || ||	TRUE	igd	6	75182536	0.033745	9.16336e-06	GCST90199648	1,5-anhydroglucitol (1,5-ag) levels	8139	2	TRUE			0.00241255	8139	6.25471e-06	184305	TRUE	3.81399e-05	0.00234262	19.1067	29.788	19.6784
rs116139938	T	G	T	G	-0.267495	-0.048158	0.0309995	0.035288	FALSE	FALSE	FALSE	ieu-a-7	17	18906041	0.0366847	184305	0.189266	Coronary heart disease || id:ieu-a-7	Coronary heart disease	Coronary heart disease || ||	TRUE	igd	17	19002728	0.0444913	1.82908e-09	GCST90199648	1,5-anhydroglucitol (1,5-ag) levels	8139	2	TRUE			0.00442274	8139	9.35041e-06	184305	TRUE	2.03267e-08	0.00429873	35.1298	29.788	36.1477
rs116855721	A	G	A	G	0.235097	-0.015001	0.0228932	0.029719	FALSE	FALSE	FALSE	ieu-a-7	14	55051548	0.0282193	184305	0.595012	Coronary heart disease || id:ieu-a-7	Coronary heart disease	Coronary heart disease || ||	TRUE	igd	14	54584830	0.0504828	3.20903e-06	GCST90199648	1,5-anhydroglucitol (1,5-ag) levels	8139	2	TRUE			0.0026582	8139	1.53326e-06	184305	TRUE	8.75414e-06	0.00247271	20.1703	29.788	21.6874
rs117813792	G	A	G	A	-0.331071	-0.067334	0.0136799	0.010683	FALSE	FALSE	FALSE	ieu-a-7	9	116491682	0.072471	184305	0.352829	Coronary heart disease || id:ieu-a-7	Coronary heart disease	Coronary heart disease || ||	TRUE	igd	9	113729402	0.0662852	5.89455e-07	GCST90199648	1,5-anhydroglucitol (1,5-ag) levels	8139	2	TRUE			0.00305644	8139	4.68388e-06	184305	TRUE	2.67803e-06	0.00295783	24.1393	29.788	24.9465
rs11912766	A	G	A	G	-3.06436	0.007414	0.000123047	0.029624	FALSE	FALSE	FALSE	ieu-a-7	22	26543088	0.0338419	184305	0.82659	Coronary heart disease || id:ieu-a-7	Coronary heart disease	Coronary heart disease || ||	TRUE	igd	22	26147122	0.685923	7.91384e-06	GCST90199648	1,5-anhydroglucitol (1,5-ag) levels	8139	2	TRUE			0.00244681	8139	2.60413e-07	184305	TRUE	1.52574e-05	0.00231061	18.845	29.788	19.9585
rs11976181	C	T	C	T	-0.132448	0.000623	0.817748	0.750844	FALSE	FALSE	FALSE	ieu-a-7	7	141797564	0.0122326	184305	0.959382	Coronary heart disease || id:ieu-a-7	Coronary heart disease	Coronary heart disease || ||	TRUE	igd	7	142097764	0.0208369	2.06534e-10	GCST90199648	1,5-anhydroglucitol (1,5-ag) levels	8139	2	TRUE			0.00494093	8139	1.40736e-08	184305	TRUE	5.48347e-10	0.00522893	42.7714	29.788	40.404
rs138306161	T	C	T	C	-0.308695	-0.001812	0.0122087	0.012114	FALSE	FALSE	FALSE	ieu-a-7	9	89327686	0.0475855	184305	0.969625	Coronary heart disease || id:ieu-a-7	Coronary heart disease	Coronary heart disease || ||	TRUE	igd	9	86712771	0.069429	8.74061e-06	GCST90199648	1,5-anhydroglucitol (1,5-ag) levels	8139	2	TRUE			0.00242359	8139	7.86746e-09	184305	TRUE	1.41619e-05	0.00229839	18.7451	29.788	19.7687
rs138882034	C	T	C	T	-0.40062	0.061675	0.00797971	0.015669	FALSE	FALSE	FALSE	ieu-a-7	3	14256941	0.0518557	184305	0.234298	Coronary heart disease || id:ieu-a-7	Coronary heart disease	Coronary heart disease || ||	TRUE	igd	3	14215441	0.0847491	2.27723e-06	GCST90199648	1,5-anhydroglucitol (1,5-ag) levels	8139	2	TRUE			0.00273867	8139	7.6752e-06	184305	TRUE	1.19131e-05	0.00254099	20.7287	29.788	22.3458
rs139280007	C	G	C	G	-0.241187	0.046177	0.0208697	0.020765	FALSE	TRUE	FALSE	ieu-a-7	2	34846167	0.0501165	184305	0.356845	Coronary heart disease || id:ieu-a-7	Coronary heart disease	Coronary heart disease || ||	TRUE	igd	2	34621100	0.0534709	6.46361e-06	GCST90199648	1,5-anhydroglucitol (1,5-ag) levels	8139	2	TRUE			0.00249416	8139	4.60634e-06	184305	TRUE	2.41416e-05	0.00237736	19.3907	29.788	20.3457
rs16923778	T	C	T	C	-0.364422	0.048827	0.0114964	0.035619	FALSE	FALSE	FALSE	ieu-a-7	11	7262789	0.0322081	184305	0.129524	Coronary heart disease || id:ieu-a-7	Coronary heart disease	Coronary heart disease || ||	TRUE	igd	11	7241558	0.0717318	3.76743e-07	GCST90199648	1,5-anhydroglucitol (1,5-ag) levels	8139	2	TRUE			0.00316188	8139	1.24696e-05	184305	TRUE	3.20625e-06	0.00301842	24.6352	29.788	25.8099
rs16936434	A	G	A	G	-0.144243	0.000329	0.0583838	0.077784	FALSE	FALSE	FALSE	ieu-a-7	11	42250690	0.017727	184305	0.985193	Coronary heart disease || id:ieu-a-7	Coronary heart disease	Coronary heart disease || ||	TRUE	igd	11	42229140	0.0325739	9.50335e-06	GCST90199648	1,5-anhydroglucitol (1,5-ag) levels	8139	2	TRUE			0.00240403	8139	1.86891e-09	184305	TRUE	1.50649e-05	0.00228763	18.6571	29.788	19.6088
rs219151	C	G	C	G	-0.0930985	0.002075	0.803761	0.773234	FALSE	TRUE	FALSE	ieu-a-7	2	33215687	0.0118589	184305	0.8611	Coronary heart disease || id:ieu-a-7	Coronary heart disease	Coronary heart disease || ||	TRUE	igd	2	32990620	0.0192478	1.31914e-06	GCST90199648	1,5-anhydroglucitol (1,5-ag) levels	8139	2	TRUE			0.0028669	8139	1.66117e-07	184305	TRUE	2.66668e-06	0.00273418	22.309	29.788	23.395
rs2638281	G	A	G	A	0.0758197	0.00445	0.588573	0.498612	FALSE	FALSE	FALSE	ieu-a-7	19	49210869	0.0100633	184305	0.658343	Coronary heart disease || id:ieu-a-7	Coronary heart disease	Coronary heart disease || ||	TRUE	igd	19	48707612	0.015228	6.39246e-07	GCST90199648	1,5-anhydroglucitol (1,5-ag) levels	8139	2	TRUE			0.00303734	8139	1.06098e-06	184305	TRUE	1.76271e-06	0.00278412	22.7176	29.788	24.7901
rs2800798	A	G	A	G	0.079919	0.017246	0.245431	0.268695	FALSE	FALSE	FALSE	ieu-a-7	1	164666253	0.0103131	184305	0.0944778	Coronary heart disease || id:ieu-a-7	Coronary heart disease	Coronary heart disease || ||	TRUE	igd	1	164697016	0.0176597	6.02526e-06	GCST90199648	1,5-anhydroglucitol (1,5-ag) levels	8139	2	TRUE			0.0025106	8139	1.51726e-05	184305	TRUE	4.44897e-05	0.00236569	19.2953	29.788	20.4802
rs28429046	T	A	T	A	0.0877134	0.008165	0.218221	0.19727	FALSE	TRUE	FALSE	ieu-a-7	1	242167231	0.019075	184305	0.668618	Coronary heart disease || id:ieu-a-7	Coronary heart disease	Coronary heart disease || ||	TRUE	igd	1	242003929	0.0190478	4.12664e-06	GCST90199648	1,5-anhydroglucitol (1,5-ag) levels	8139	2	TRUE			0.00259925	8139	9.94147e-07	184305	TRUE	1.00419e-05	0.00262508	21.4165	29.788	21.2052
rs34278530	C	T	C	T	0.0966945	-0.021681	0.16675	0.19558	FALSE	FALSE	FALSE	ieu-a-7	16	84689718	0.0131233	184305	0.0985145	Coronary heart disease || id:ieu-a-7	Coronary heart disease	Coronary heart disease || ||	TRUE	igd	16	84656112	0.020462	2.29468e-06	GCST90199648	1,5-anhydroglucitol (1,5-ag) levels	8139	2	TRUE			0.00273686	8139	1.48093e-05	184305	TRUE	1.84809e-05	0.00259821	21.1967	29.788	22.331
rs4988235	A	G	A	G	0.125118	-0.01518	0.646606	0.541257	FALSE	FALSE	FALSE	ieu-a-7	2	136608646	0.0115037	184305	0.186976	Coronary heart disease || id:ieu-a-7	Coronary heart disease	Coronary heart disease || ||	TRUE	igd	2	135851076	0.015516	7.39543e-16	GCST90199648	1,5-anhydroglucitol (1,5-ag) levels	8139	2	TRUE			0.00792791	8139	9.44783e-06	184305	TRUE	2.7576e-14	0.00715432	58.6342	29.788	65.025
rs526600	A	T	A	T	-0.303655	-0.026851	0.980668	0.977146	FALSE	TRUE	FALSE	ieu-a-7	1	87366597	0.0472259	184305	0.569651	Coronary heart disease || id:ieu-a-7	Coronary heart disease	Coronary heart disease || ||	TRUE	igd	1	86900914	0.0557783	5.21094e-08	GCST90199648	1,5-anhydroglucitol (1,5-ag) levels	8139	2	TRUE			0.003629	8139	1.75399e-06	184305	TRUE	1.91736e-07	0.00349615	28.548	29.788	29.6367
rs6444144	T	C	T	C	0.0750138	0.004926	0.601673	0.587369	FALSE	FALSE	FALSE	ieu-a-7	3	164809016	0.0095212	184305	0.604898	Coronary heart disease || id:ieu-a-7	Coronary heart disease	Coronary heart disease || ||	TRUE	igd	3	165091228	0.0155373	1.37932e-06	GCST90199648	1,5-anhydroglucitol (1,5-ag) levels	8139	2	TRUE			0.00285644	8139	1.45235e-06	184305	TRUE	3.91403e-06	0.0026972	22.0064	29.788	23.3094
rs72670617	G	T	G	T	-0.109981	-0.001634	0.120487	0.144359	FALSE	FALSE	FALSE	ieu-a-7	13	114616103	0.0160552	184305	0.918936	Coronary heart disease || id:ieu-a-7	Coronary heart disease	Coronary heart disease || ||	TRUE	igd	13	113913130	0.0239503	4.38952e-06	GCST90199648	1,5-anhydroglucitol (1,5-ag) levels	8139	2	TRUE			0.00258479	8139	5.62005e-08	184305	TRUE	7.79316e-06	0.00256359	20.9135	29.788	21.0869
rs7536190	A	T	A	T	0.113912	0.02471	0.886879	0.859449	FALSE	TRUE	FALSE	ieu-a-7	1	150399105	0.0160215	184305	0.123001	Coronary heart disease || id:ieu-a-7	Coronary heart disease	Coronary heart disease || ||	TRUE	igd	1	150426629	0.0241326	2.35583e-06	GCST90199648	1,5-anhydroglucitol (1,5-ag) levels	8139	2	TRUE			0.00273073	8139	1.29063e-05	184305	TRUE	1.70889e-05	0.00260361	21.2409	29.788	22.2808
rs77283946	A	C	A	C	-0.552741	0.011527	0.0189905	0.040788	FALSE	FALSE	FALSE	ieu-a-7	17	18886281	0.0335964	184305	0.731521	Coronary heart disease || id:ieu-a-7	Coronary heart disease	Coronary heart disease || ||	TRUE	igd	17	18982968	0.0562598	8.80516e-23	GCST90199648	1,5-anhydroglucitol (1,5-ag) levels	8139	2	TRUE			0.0117236	8139	6.38726e-07	184305	TRUE	1.65333e-21	0.0113837	93.6957	29.788	96.5266
rs78394231	C	T	C	T	0.116636	0.008817	0.0970646	0.087386	FALSE	FALSE	FALSE	ieu-a-7	6	107649123	0.0177574	184305	0.619524	Coronary heart disease || id:ieu-a-7	Coronary heart disease	Coronary heart disease || ||	TRUE	igd	6	107327919	0.0258071	6.19749e-06	GCST90199648	1,5-anhydroglucitol (1,5-ag) levels	8139	2	TRUE			0.002504	8139	1.33767e-06	184305	TRUE	1.56918e-05	0.00238458	19.4497	29.788	20.4262
rs868427	C	T	C	T	-0.103914	-0.025833	0.130862	0.164461	FALSE	FALSE	FALSE	ieu-a-7	8	52443945	0.0126986	184305	0.0419189	Coronary heart disease || id:ieu-a-7	Coronary heart disease	Coronary heart disease || ||	TRUE	igd	8	51531385	0.0229285	5.83995e-06	GCST90199648	1,5-anhydroglucitol (1,5-ag) levels	8139	2	TRUE			0.0025179	8139	2.24541e-05	184305	TRUE	5.94901e-05	0.00245629	20.0361	29.788	20.5398
rs10188669	A	G	A	G	-0.0671657	-0.012361	0.51141	0.491057	FALSE	FALSE	FALSE	ieu-a-7	2	151753903	0.0095658	184305	0.196284	Coronary heart disease || id:ieu-a-7	Coronary heart disease	Coronary heart disease || ||	TRUE	igd	2	150897389	0.0151226	8.93665e-06	GCST90199649	1-stearoyl-2-arachidonoyl-GPI (18:0/20:4) levels	8134	2	TRUE			0.00241987	8134	9.06e-06	184305	TRUE	4.52449e-05	0.00225444	18.3745	29.788	19.7261
rs11121795	T	C	T	C	-0.178874	0.026967	0.0377603	0.055851	FALSE	FALSE	FALSE	ieu-a-7	1	6459999	0.0207262	184305	0.193222	Coronary heart disease || id:ieu-a-7	Coronary heart disease	Coronary heart disease || ||	TRUE	igd	1	6399939	0.0395199	6.00641e-06	GCST90199649	1-stearoyl-2-arachidonoyl-GPI (18:0/20:4) levels	8134	2	TRUE			0.00251289	8134	9.18522e-06	184305	TRUE	3.18332e-05	0.00232511	18.9518	29.788	20.4863
rs112843621	G	A	G	A	-0.366363	-0.060267	0.0095679	0.01103	FALSE	FALSE	FALSE	ieu-a-7	14	26519047	0.0514418	184305	0.241375	Coronary heart disease || id:ieu-a-7	Coronary heart disease	Coronary heart disease || ||	TRUE	igd	14	26049841	0.0780364	2.66903e-06	GCST90199649	1-stearoyl-2-arachidonoyl-GPI (18:0/20:4) levels	8134	2	TRUE			0.00270306	8134	7.44717e-06	184305	TRUE	1.35309e-05	0.00254387	20.7395	29.788	22.0409
rs112957492	C	T	C	T	-0.195795	-0.011448	0.338891	0.315687	FALSE	FALSE	FALSE	ieu-a-7	1	63117010	0.0101317	184305	0.258511	Coronary heart disease || id:ieu-a-7	Coronary heart disease	Coronary heart disease || ||	TRUE	igd	1	62651339	0.0157253	1.38202e-35	GCST90199649	1-stearoyl-2-arachidonoyl-GPI (18:0/20:4) levels	8134	2	TRUE			0.0187071	8134	6.92722e-06	184305	TRUE	1.00455e-32	0.0171778	142.131	29.788	155.026
rs115307528	G	A	G	A	-0.299834	-0.068454	0.0131579	0.011137	FALSE	FALSE	FALSE	ieu-a-7	2	167125011	0.0630856	184305	0.277879	Coronary heart disease || id:ieu-a-7	Coronary heart disease	Coronary heart disease || ||	TRUE	igd	2	166268501	0.0666202	6.77474e-06	GCST90199649	1-stearoyl-2-arachidonoyl-GPI (18:0/20:4) levels	8134	2	TRUE			0.00248469	8134	6.38855e-06	184305	TRUE	2.92291e-05	0.00233467	19.03	29.788	20.2558
rs140033739	A	G	A	G	-0.166275	0.002198	0.0496511	0.029744	FALSE	FALSE	FALSE	ieu-a-7	6	30205152	0.0427755	184305	0.959019	Coronary heart disease || id:ieu-a-7	Coronary heart disease	Coronary heart disease || ||	TRUE	igd	6	30237375	0.0351807	2.28641e-06	GCST90199649	1-stearoyl-2-arachidonoyl-GPI (18:0/20:4) levels	8134	2	TRUE			0.00273941	8134	1.43263e-08	184305	TRUE	3.98005e-06	0.00260913	21.273	29.788	22.338
rs141701630	T	C	T	C	0.317893	0.022154	0.012135	0.015002	FALSE	FALSE	FALSE	ieu-a-7	7	100171073	0.0531722	184305	0.676937	Coronary heart disease || id:ieu-a-7	Coronary heart disease	Coronary heart disease || ||	TRUE	igd	7	100573450	0.0698624	5.3575e-06	GCST90199649	1-stearoyl-2-arachidonoyl-GPI (18:0/20:4) levels	8134	2	TRUE			0.00253965	8134	9.41894e-07	184305	TRUE	1.2695e-05	0.00242287	19.7506	29.788	20.705
rs1532085	G	A	G	A	-0.0917612	-0.01812	0.623614	0.587943	FALSE	FALSE	FALSE	ieu-a-7	15	58683366	0.0093539	184305	0.0527266	Coronary heart disease || id:ieu-a-7	Coronary heart disease	Coronary heart disease || ||	TRUE	igd	15	58391167	0.0157522	5.70113e-09	GCST90199649	1-stearoyl-2-arachidonoyl-GPI (18:0/20:4) levels	8134	2	TRUE			0.00415556	8134	2.03606e-05	184305	TRUE	1.16826e-07	0.00395273	32.2712	29.788	33.9341
rs157595	G	A	G	A	0.0939248	0.014573	0.599898	0.579411	FALSE	FALSE	FALSE	ieu-a-7	19	45425460	0.0112006	184305	0.193228	Coronary heart disease || id:ieu-a-7	Coronary heart disease	Coronary heart disease || ||	TRUE	igd	19	44922203	0.0158609	3.18487e-09	GCST90199649	1-stearoyl-2-arachidonoyl-GPI (18:0/20:4) levels	8134	2	TRUE			0.00429377	8134	9.185e-06	184305	TRUE	3.32571e-08	0.00423486	34.5843	29.788	35.0675
rs174560	C	T	C	T	-0.263536	-0.01987	0.306967	0.288877	FALSE	FALSE	FALSE	ieu-a-7	11	61581764	0.0103196	184305	0.0541726	Coronary heart disease || id:ieu-a-7	Coronary heart disease	Coronary heart disease || ||	TRUE	igd	11	61814292	0.0162451	3.49778e-59	GCST90199649	1-stearoyl-2-arachidonoyl-GPI (18:0/20:4) levels	8134	2	TRUE			0.0313477	8134	2.01154e-05	184305	TRUE	1.77112e-53	0.0295499	247.617	29.788	263.169
rs2269938	G	C	G	C	-0.104296	-0.004393	0.166874	0.195466	FALSE	TRUE	FALSE	ieu-a-7	12	120242014	0.0116482	184305	0.706069	Coronary heart disease || id:ieu-a-7	Coronary heart disease	Coronary heart disease || ||	TRUE	igd	12	119804210	0.0203216	2.86272e-07	GCST90199649	1-stearoyl-2-arachidonoyl-GPI (18:0/20:4) levels	8134	2	TRUE			0.00322863	8134	7.71742e-07	184305	TRUE	7.72719e-07	0.00302458	24.6705	29.788	26.3402
rs2712421	T	G	T	G	0.0732419	-0.008249	0.655887	0.673045	FALSE	FALSE	FALSE	ieu-a-7	3	128287743	0.0105999	184305	0.436442	Coronary heart disease || id:ieu-a-7	Coronary heart disease	Coronary heart disease || ||	TRUE	igd	3	128568900	0.0160311	4.90664e-06	GCST90199649	1-stearoyl-2-arachidonoyl-GPI (18:0/20:4) levels	8134	2	TRUE			0.00256025	8134	3.28598e-06	184305	TRUE	1.63979e-05	0.00242147	19.7392	29.788	20.8734
rs34542491	T	C	T	C	0.0896599	0.004815	0.175664	0.1679	FALSE	FALSE	FALSE	ieu-a-7	5	168232811	0.0122467	184305	0.694196	Coronary heart disease || id:ieu-a-7	Coronary heart disease	Coronary heart disease || ||	TRUE	igd	5	168805806	0.0199692	7.12545e-06	GCST90199649	1-stearoyl-2-arachidonoyl-GPI (18:0/20:4) levels	8134	2	TRUE			0.00247288	8134	8.38729e-07	184305	TRUE	1.62425e-05	0.00232816	18.9768	29.788	20.1593
rs3812316	G	C	G	C	-0.136926	0.010087	0.121888	0.118659	FALSE	TRUE	FALSE	ieu-a-7	7	73020337	0.0150243	184305	0.50198	Coronary heart disease || id:ieu-a-7	Coronary heart disease	Coronary heart disease || ||	TRUE	igd	7	73606007	0.023095	3.05078e-09	GCST90199649	1-stearoyl-2-arachidonoyl-GPI (18:0/20:4) levels	8134	2	TRUE			0.00430393	8134	2.44569e-06	184305	TRUE	1.51662e-08	0.0040134	32.7685	29.788	35.1509
rs400810	G	A	G	A	0.128883	-0.019289	0.0862856	0.091101	FALSE	FALSE	FALSE	ieu-a-7	5	31675161	0.016091	184305	0.230629	Coronary heart disease || id:ieu-a-7	Coronary heart disease	Coronary heart disease || ||	TRUE	igd	5	31675054	0.0270407	1.8767e-06	GCST90199649	1-stearoyl-2-arachidonoyl-GPI (18:0/20:4) levels	8134	2	TRUE			0.00278578	8134	7.79682e-06	184305	TRUE	1.00725e-05	0.00261921	21.3553	29.788	22.7172
rs60417901	T	C	T	C	-0.226606	-0.005944	0.0227329	0.0547	FALSE	FALSE	FALSE	ieu-a-7	7	92226376	0.0216756	184305	0.783911	Coronary heart disease || id:ieu-a-7	Coronary heart disease	Coronary heart disease || ||	TRUE	igd	7	92597062	0.051098	9.21865e-06	GCST90199649	1-stearoyl-2-arachidonoyl-GPI (18:0/20:4) levels	8134	2	TRUE			0.00241262	8134	4.08021e-07	184305	TRUE	1.85515e-05	0.00228161	18.5965	29.788	19.6669
rs66466742	T	C	T	C	-0.189746	0.014496	0.0402441	0.077052	FALSE	FALSE	FALSE	ieu-a-7	19	11336444	0.0170296	184305	0.394644	Coronary heart disease || id:ieu-a-7	Coronary heart disease	Coronary heart disease || ||	TRUE	igd	19	11225768	0.0383851	7.68393e-07	GCST90199649	1-stearoyl-2-arachidonoyl-GPI (18:0/20:4) levels	8134	2	TRUE			0.00299585	8134	3.93146e-06	184305	TRUE	3.1626e-06	0.00278124	22.6801	29.788	24.4354
rs7241918	T	G	T	G	0.132894	-0.020319	0.826708	0.813495	FALSE	FALSE	FALSE	ieu-a-7	18	47160953	0.0128181	184305	0.112925	Coronary heart disease || id:ieu-a-7	Coronary heart disease	Coronary heart disease || ||	TRUE	igd	18	49634583	0.0200029	3.05834e-11	GCST90199649	1-stearoyl-2-arachidonoyl-GPI (18:0/20:4) levels	8134	2	TRUE			0.00539854	8134	1.36339e-05	184305	TRUE	6.83978e-10	0.00506024	41.3592	29.788	44.1392
rs72697217	C	G	C	G	0.139809	-0.033736	0.0714189	0.083663	FALSE	TRUE	FALSE	ieu-a-7	9	7763957	0.0207783	184305	0.104458	Coronary heart disease || id:ieu-a-7	Coronary heart disease	Coronary heart disease || ||	TRUE	igd	9	7763957	0.031174	7.29826e-06	GCST90199649	1-stearoyl-2-arachidonoyl-GPI (18:0/20:4) levels	8134	2	TRUE			0.00246726	8134	1.4303e-05	184305	TRUE	5.05214e-05	0.00259259	21.1377	29.788	20.1134
rs74988287	C	T	C	T	-0.366432	-0.024302	0.0099395	0.010158	FALSE	FALSE	FALSE	ieu-a-7	2	36917860	0.057966	184305	0.675036	Coronary heart disease || id:ieu-a-7	Coronary heart disease	Coronary heart disease || ||	TRUE	igd	2	36690717	0.0770971	2.00554e-06	GCST90199649	1-stearoyl-2-arachidonoyl-GPI (18:0/20:4) levels	8134	2	TRUE			0.00277018	8134	9.53684e-07	184305	TRUE	5.04875e-06	0.00264267	21.5471	29.788	22.5897
rs77960347	G	A	G	A	0.479876	-0.101958	0.0143349	0.010572	FALSE	FALSE	FALSE	ieu-a-7	18	47109955	0.0508976	184305	0.0451554	Coronary heart disease || id:ieu-a-7	Coronary heart disease	Coronary heart disease || ||	TRUE	igd	18	49583585	0.0634052	3.77862e-14	GCST90199649	1-stearoyl-2-arachidonoyl-GPI (18:0/20:4) levels	8134	2	TRUE			0.00699459	8134	2.17724e-05	184305	TRUE	2.83061e-12	0.00650747	53.2654	29.788	57.2807
rs79608464	A	G	A	G	0.25749	0.00809	0.01871	0.044633	FALSE	FALSE	FALSE	ieu-a-7	16	71332588	0.0207544	184305	0.696687	Coronary heart disease || id:ieu-a-7	Coronary heart disease	Coronary heart disease || ||	TRUE	igd	16	71298685	0.0562381	4.68177e-06	GCST90199649	1-stearoyl-2-arachidonoyl-GPI (18:0/20:4) levels	8134	2	TRUE			0.00257125	8134	8.24411e-07	184305	TRUE	1.09016e-05	0.00243457	19.8462	29.788	20.9633
rs80195574	A	G	A	G	-0.221346	-0.022079	0.0272033	0.024371	FALSE	FALSE	FALSE	ieu-a-7	14	34582811	0.0366912	184305	0.54734	Coronary heart disease || id:ieu-a-7	Coronary heart disease	Coronary heart disease || ||	TRUE	igd	14	34113605	0.0471492	2.67135e-06	GCST90199649	1-stearoyl-2-arachidonoyl-GPI (18:0/20:4) levels	8134	2	TRUE			0.00270285	8134	1.96472e-06	184305	TRUE	7.88491e-06	0.00259309	21.1418	29.788	22.0391
rs964184	C	G	C	G	-0.194744	-0.049958	0.868833	0.815294	FALSE	TRUE	FALSE	ieu-a-7	11	116648917	0.0123988	184305	5.60003e-05	Coronary heart disease || id:ieu-a-7	Coronary heart disease	Coronary heart disease || ||	TRUE	igd	11	116778201	0.0224871	4.70771e-18	GCST90199649	1-stearoyl-2-arachidonoyl-GPI (18:0/20:4) levels	8134	2	TRUE			0.00913854	8134	8.80806e-05	184305	TRUE	2.283e-14	0.00864409	70.9066	29.788	75
rs113392484	C	T	C	T	0.318007	-0.031236	0.0109306	0.022388	FALSE	FALSE	FALSE	ieu-a-7	6	79147497	0.0371192	184305	0.400065	Coronary heart disease || id:ieu-a-7	Coronary heart disease	Coronary heart disease || ||	TRUE	igd	6	78437780	0.0686372	3.60129e-06	GCST90199650	Indolelactate levels	8233	2	TRUE			0.00260118	8233	3.8422e-06	184305	TRUE	1.31962e-05	0.00218662	18.0375	29.788	21.4662
rs11598287	A	G	A	G	0.0749453	0.007201	0.30454	0.298045	FALSE	FALSE	FALSE	ieu-a-7	10	133914409	0.0113592	184305	0.526124	Coronary heart disease || id:ieu-a-7	Coronary heart disease	Coronary heart disease || ||	TRUE	igd	10	132100905	0.0160157	2.87603e-06	GCST90199650	Indolelactate levels	8233	2	TRUE			0.00265333	8233	2.1805e-06	184305	TRUE	8.78878e-06	0.00237922	19.6301	29.788	21.8976
rs11647808	A	C	A	C	0.212473	-0.017332	0.0790114	0.076294	FALSE	FALSE	FALSE	ieu-a-7	16	58770881	0.0177226	184305	0.328095	Coronary heart disease || id:ieu-a-7	Coronary heart disease	Coronary heart disease || ||	TRUE	igd	16	58736977	0.0262875	6.33765e-16	GCST90199650	Indolelactate levels	8233	2	TRUE			0.0078745	8233	5.18929e-06	184305	TRUE	1.41575e-14	0.00657024	54.4373	29.788	65.3294
rs117078442	A	G	A	G	-0.209946	-0.007531	0.024059	0.022677	FALSE	FALSE	FALSE	ieu-a-7	7	22336301	0.0329707	184305	0.819324	Coronary heart disease || id:ieu-a-7	Coronary heart disease	Coronary heart disease || ||	TRUE	igd	7	22296682	0.046984	7.87867e-06	GCST90199650	Indolelactate levels	8233	2	TRUE			0.00241997	8233	2.83085e-07	184305	TRUE	1.54164e-05	0.00206989	17.0726	29.788	19.9671
rs11950935	C	T	C	T	-0.0798371	-0.008156	0.194657	0.158509	FALSE	FALSE	FALSE	ieu-a-7	5	27771543	0.0142802	184305	0.567905	Coronary heart disease || id:ieu-a-7	Coronary heart disease	Coronary heart disease || ||	TRUE	igd	5	27771436	0.0178954	8.14575e-06	GCST90199650	Indolelactate levels	8233	2	TRUE			0.00241227	8233	1.76992e-06	184305	TRUE	2.18769e-05	0.00199844	16.4821	29.788	19.9034
rs1255731	C	T	C	T	-0.0753124	-0.008	0.236978	0.249909	FALSE	FALSE	FALSE	ieu-a-7	14	64016311	0.0107661	184305	0.457438	Coronary heart disease || id:ieu-a-7	Coronary heart disease	Coronary heart disease || ||	TRUE	igd	14	63549593	0.0168771	8.10475e-06	GCST90199650	Indolelactate levels	8233	2	TRUE			0.00241343	8233	2.99591e-06	184305	TRUE	2.54998e-05	0.0020512	16.9181	29.788	19.913
rs1354368	G	A	G	A	-0.072441	0.008495	0.64522	0.612303	FALSE	FALSE	FALSE	ieu-a-7	4	100441886	0.0097244	184305	0.382347	Coronary heart disease || id:ieu-a-7	Coronary heart disease	Coronary heart disease || ||	TRUE	igd	4	99520729	0.0148179	1.01477e-06	GCST90199650	Indolelactate levels	8233	2	TRUE			0.00289523	8233	4.14063e-06	184305	TRUE	4.22681e-06	0.00240251	19.8227	29.788	23.8999
rs139117506	C	A	C	A	-0.175748	0.000748	0.0370029	0.043578	FALSE	FALSE	FALSE	ieu-a-7	15	83976986	0.0265356	184305	0.977512	Coronary heart disease || id:ieu-a-7	Coronary heart disease	Coronary heart disease || ||	TRUE	igd	15	83308234	0.0379139	3.56131e-06	GCST90199650	Indolelactate levels	8233	2	TRUE			0.00260375	8233	4.31135e-09	184305	TRUE	5.97647e-06	0.00220126	18.1586	29.788	21.4874
rs142009207	C	G	C	G	-0.118055	0.042652	0.0765238	0.07242	FALSE	TRUE	FALSE	ieu-a-7	17	40546411	0.0194053	184305	0.0279518	Coronary heart disease || id:ieu-a-7	Coronary heart disease	Coronary heart disease || ||	TRUE	igd	17	42394393	0.0266692	9.57138e-06	GCST90199650	Indolelactate levels	8233	2	TRUE			0.002375	8233	2.62116e-05	184305	TRUE	0.000106804	0.00196979	16.2454	29.788	19.5952
rs142582686	T	G	T	G	0.164806	0.004811	0.0429166	0.038816	FALSE	FALSE	FALSE	ieu-a-7	10	102764904	0.0328165	184305	0.883445	Coronary heart disease || id:ieu-a-7	Coronary heart disease	Coronary heart disease || ||	TRUE	igd	10	101005147	0.0355849	3.63318e-06	GCST90199650	Indolelactate levels	8233	2	TRUE			0.00259915	8233	1.16615e-07	184305	TRUE	6.83612e-06	0.00223126	18.4066	29.788	21.4494
rs148403098	T	C	T	C	0.167538	0.025033	0.0411829	0.038204	FALSE	FALSE	FALSE	ieu-a-7	14	102818282	0.0269712	184305	0.353336	Coronary heart disease || id:ieu-a-7	Coronary heart disease	Coronary heart disease || ||	TRUE	igd	14	102351945	0.0359224	3.10312e-06	GCST90199650	Indolelactate levels	8233	2	TRUE			0.00263571	8233	4.67402e-06	184305	TRUE	1.24852e-05	0.00221671	18.2863	29.788	21.7518
rs150393758	T	C	T	C	0.172921	-0.011281	0.0355126	0.036034	FALSE	FALSE	FALSE	ieu-a-7	17	67860119	0.0378036	184305	0.76539	Coronary heart disease || id:ieu-a-7	Coronary heart disease	Coronary heart disease || ||	TRUE	igd	17	69863978	0.0390292	9.39877e-06	GCST90199650	Indolelactate levels	8233	2	TRUE			0.00237919	8233	4.83166e-07	184305	TRUE	1.94472e-05	0.00204835	16.8946	29.788	19.6298
rs1867457	C	T	C	T	-0.102015	0.010743	0.111679	0.107168	FALSE	FALSE	FALSE	ieu-a-7	5	179604217	0.0147745	184305	0.467144	Coronary heart disease || id:ieu-a-7	Coronary heart disease	Coronary heart disease || ||	TRUE	igd	5	180177217	0.0229082	8.45953e-06	GCST90199650	Indolelactate levels	8233	2	TRUE			0.00240352	8233	2.86874e-06	184305	TRUE	2.61494e-05	0.0020649	17.0314	29.788	19.8311
rs190002061	A	G	A	G	-0.265524	-0.029576	0.0150532	0.009148	FALSE	FALSE	FALSE	ieu-a-7	2	49479757	0.0692546	184305	0.669334	Coronary heart disease || id:ieu-a-7	Coronary heart disease	Coronary heart disease || ||	TRUE	igd	2	49252618	0.058646	5.9667e-06	GCST90199650	Indolelactate levels	8233	2	TRUE			0.00248427	8233	9.89575e-07	184305	TRUE	1.42907e-05	0.00209064	17.2441	29.788	20.4989
rs19009	C	T	C	T	-0.0637423	0.00209	0.428307	0.449166	FALSE	FALSE	FALSE	ieu-a-7	20	6736598	0.0099862	184305	0.834222	Coronary heart disease || id:ieu-a-7	Coronary heart disease	Coronary heart disease || ||	TRUE	igd	20	6755951	0.0143515	8.9327e-06	GCST90199650	Indolelactate levels	8233	2	TRUE			0.00239094	8233	2.37662e-07	184305	TRUE	1.70587e-05	0.00198977	16.4105	29.788	19.727
rs2472509	G	T	G	T	0.07003	-0.004839	0.326865	0.342568	FALSE	FALSE	FALSE	ieu-a-7	9	107684230	0.0098601	184305	0.623594	Coronary heart disease || id:ieu-a-7	Coronary heart disease	Coronary heart disease || ||	TRUE	igd	9	104921949	0.0152695	4.51219e-06	GCST90199650	Indolelactate levels	8233	2	TRUE			0.00254893	8233	1.30682e-06	184305	TRUE	1.16774e-05	0.00215809	17.8016	29.788	21.0338
rs2794660	T	C	T	C	0.0949183	0.012057	0.140026	0.183239	FALSE	FALSE	FALSE	ieu-a-7	13	47323155	0.0124726	184305	0.333706	Coronary heart disease || id:ieu-a-7	Coronary heart disease	Coronary heart disease || ||	TRUE	igd	13	46749020	0.0213333	8.61484e-06	GCST90199650	Indolelactate levels	8233	2	TRUE			0.00239932	8233	5.07026e-06	184305	TRUE	3.30593e-05	0.00216982	17.8986	29.788	19.7963
rs2997922	T	C	T	C	0.185074	0.012494	0.709362	0.667944	FALSE	FALSE	FALSE	ieu-a-7	9	131580744	0.0099557	184305	0.209495	Coronary heart disease || id:ieu-a-7	Coronary heart disease	Coronary heart disease || ||	TRUE	igd	9	128818465	0.0156931	4.22481e-32	GCST90199650	Indolelactate levels	8233	2	TRUE			0.0166167	8233	8.54522e-06	184305	TRUE	2.42032e-29	0.0141235	117.916	29.788	139.083
rs34380016	G	A	G	A	-0.0666468	0.014895	0.437266	0.404717	FALSE	FALSE	FALSE	ieu-a-7	1	29558230	0.0095929	184305	0.120493	Coronary heart disease || id:ieu-a-7	Coronary heart disease	Coronary heart disease || ||	TRUE	igd	1	29231718	0.0146285	5.21484e-06	GCST90199650	Indolelactate levels	8233	2	TRUE			0.00251543	8233	1.30811e-05	184305	TRUE	3.55958e-05	0.00218594	18.0319	29.788	20.7567
rs35021400	A	C	A	C	-0.0820587	-0.010065	0.214409	0.216868	FALSE	FALSE	FALSE	ieu-a-7	16	87046632	0.0113201	184305	0.373935	Coronary heart disease || id:ieu-a-7	Coronary heart disease	Coronary heart disease || ||	TRUE	igd	16	87013026	0.0174559	2.58998e-06	GCST90199650	Indolelactate levels	8233	2	TRUE			0.00267761	8233	4.28936e-06	184305	TRUE	1.01862e-05	0.0022684	18.7136	29.788	22.0986
rs61674325	T	C	T	C	-0.0679091	-0.000699	0.329491	0.28564	FALSE	FALSE	FALSE	ieu-a-7	14	44056743	0.010488	184305	0.946862	Coronary heart disease || id:ieu-a-7	Coronary heart disease	Coronary heart disease || ||	TRUE	igd	14	43587540	0.0151389	7.26587e-06	GCST90199650	Indolelactate levels	8233	2	TRUE			0.00243868	8233	2.41011e-08	184305	TRUE	1.22561e-05	0.00203767	16.8063	29.788	20.1218
rs62154332	T	C	T	C	0.118683	-0.030217	0.0765673	0.079732	FALSE	FALSE	FALSE	ieu-a-7	2	102087470	0.0179323	184305	0.0919772	Coronary heart disease || id:ieu-a-7	Coronary heart disease	Coronary heart disease || ||	TRUE	igd	2	101471008	0.0265768	7.98229e-06	GCST90199650	Indolelactate levels	8233	2	TRUE			0.00241695	8233	1.54061e-05	184305	TRUE	5.85052e-05	0.00199185	16.4276	29.788	19.9421
rs73782967	A	G	A	G	-0.152997	-0.007657	0.0546588	0.044469	FALSE	FALSE	FALSE	ieu-a-7	5	116263019	0.0246737	184305	0.75631	Coronary heart disease || id:ieu-a-7	Coronary heart disease	Coronary heart disease || ||	TRUE	igd	5	116927323	0.0316953	1.38514e-06	GCST90199650	Indolelactate levels	8233	2	TRUE			0.0028229	8233	5.22536e-07	184305	TRUE	3.22179e-06	0.00241905	19.9595	29.788	23.3011
rs75333405	C	T	C	T	-0.170317	-0.021459	0.0356968	0.036924	FALSE	FALSE	FALSE	ieu-a-7	12	90230150	0.0260881	184305	0.410758	Coronary heart disease || id:ieu-a-7	Coronary heart disease	Coronary heart disease || ||	TRUE	igd	12	89836373	0.0384177	9.28037e-06	GCST90199650	Indolelactate levels	8233	2	TRUE			0.00238213	8233	3.67113e-06	184305	TRUE	3.10733e-05	0.00199705	16.4706	29.788	19.6541
rs7617388	G	A	G	A	-0.0945532	0.008568	0.857589	0.847962	FALSE	FALSE	FALSE	ieu-a-7	3	18887390	0.0164832	184305	0.603201	Coronary heart disease || id:ieu-a-7	Coronary heart disease	Coronary heart disease || ||	TRUE	igd	3	18845898	0.0213736	9.69652e-06	GCST90199650	Indolelactate levels	8233	2	TRUE			0.00237199	8233	1.46603e-06	184305	TRUE	2.45604e-05	0.00218376	18.0139	29.788	19.5703
rs1018091	C	T	C	T	0.0675472	0.015181	0.457063	0.437285	FALSE	FALSE	FALSE	ieu-a-7	4	144539774	0.0094191	184305	0.107022	Coronary heart disease || id:ieu-a-7	Coronary heart disease	Coronary heart disease || ||	TRUE	igd	4	143618621	0.0146699	4.13525e-06	GCST90199651	Docosahexaenoate DHA; 22:6n3 levels	8279	2	TRUE			0.00255491	8279	1.40943e-05	184305	TRUE	3.0709e-05	0.00226449	18.7857	29.788	21.2012
rs11715464	G	A	G	A	-0.068416	-0.011661	0.380725	0.372155	FALSE	FALSE	FALSE	ieu-a-7	3	42909687	0.0096288	184305	0.225873	Coronary heart disease || id:ieu-a-7	Coronary heart disease	Coronary heart disease || ||	TRUE	igd	3	42868195	0.0152901	7.65771e-06	GCST90199651	Docosahexaenoate DHA; 22:6n3 levels	8279	2	TRUE			0.00241308	8279	7.95777e-06	184305	TRUE	3.71952e-05	0.00220719	18.3093	29.788	20.0214
rs117676889	C	T	C	T	0.194787	0.024654	0.0302902	0.021755	FALSE	FALSE	FALSE	ieu-a-7	10	3350264	0.0401478	184305	0.539162	Coronary heart disease || id:ieu-a-7	Coronary heart disease	Coronary heart disease || ||	TRUE	igd	10	3308072	0.0430833	6.15001e-06	GCST90199651	Docosahexaenoate DHA; 22:6n3 levels	8279	2	TRUE			0.00246353	8279	2.04606e-06	184305	TRUE	1.75823e-05	0.00222892	18.49	29.788	20.441
rs11930628	G	A	G	A	0.123625	0.005125	0.0880354	0.095187	FALSE	FALSE	FALSE	ieu-a-7	4	60653867	0.01594	184305	0.747818	Coronary heart disease || id:ieu-a-7	Coronary heart disease	Coronary heart disease || ||	TRUE	igd	4	59788149	0.0261218	2.21625e-06	GCST90199651	Docosahexaenoate DHA; 22:6n3 levels	8279	2	TRUE			0.00269873	8279	5.60891e-07	184305	TRUE	5.09563e-06	0.00245402	20.3619	29.788	22.3979
rs12129379	T	G	T	G	0.0929219	0.000527	0.17895	0.174145	FALSE	FALSE	FALSE	ieu-a-7	1	159965261	0.0128474	184305	0.96728	Coronary heart disease || id:ieu-a-7	Coronary heart disease	Coronary heart disease || ||	TRUE	igd	1	159995471	0.0196733	2.32117e-06	GCST90199651	Docosahexaenoate DHA; 22:6n3 levels	8279	2	TRUE			0.00268807	8279	9.12974e-09	184305	TRUE	4.03078e-06	0.00253727	21.0544	29.788	22.3091
rs13268878	G	A	G	A	-0.0830568	-0.000265	0.207876	0.191262	FALSE	FALSE	FALSE	ieu-a-7	8	75368316	0.0138457	184305	0.98473	Coronary heart disease || id:ieu-a-7	Coronary heart disease	Coronary heart disease || ||	TRUE	igd	8	74456081	0.0187327	9.25958e-06	GCST90199651	Docosahexaenoate DHA; 22:6n3 levels	8279	2	TRUE			0.00236944	8279	1.9876e-09	184305	TRUE	1.4808e-05	0.00227184	18.8468	29.788	19.6585
rs139278946	A	T	A	T	-0.209975	0.083523	0.026335	0.025028	FALSE	TRUE	FALSE	ieu-a-7	7	96405647	0.0362534	184305	0.0212305	Coronary heart disease || id:ieu-a-7	Coronary heart disease	Coronary heart disease || ||	TRUE	igd	7	96776335	0.0460257	5.06353e-06	GCST90199651	Docosahexaenoate DHA; 22:6n3 levels	8279	2	TRUE			0.00250825	8279	2.87985e-05	184305	TRUE	6.79688e-05	0.00226104	18.757	29.788	20.813
rs144230997	T	A	T	A	-0.321529	0.061571	0.0116734	0.014703	FALSE	TRUE	FALSE	ieu-a-7	13	71237104	0.0704462	184305	0.382111	Coronary heart disease || id:ieu-a-7	Coronary heart disease	Coronary heart disease || ||	TRUE	igd	13	70662972	0.0691608	3.33553e-06	GCST90199651	Docosahexaenoate DHA; 22:6n3 levels	8279	2	TRUE			0.00260444	8279	4.1448e-06	184305	TRUE	1.27369e-05	0.00238544	19.7915	29.788	21.6133
rs145325641	A	G	A	G	-0.229959	-0.078146	0.0247183	0.013786	FALSE	FALSE	FALSE	ieu-a-7	12	95634871	0.0569416	184305	0.169942	Coronary heart disease || id:ieu-a-7	Coronary heart disease	Coronary heart disease || ||	TRUE	igd	12	95241095	0.047234	1.12451e-06	GCST90199651	Docosahexaenoate DHA; 22:6n3 levels	8279	2	TRUE			0.00285546	8279	1.02192e-05	184305	TRUE	7.61657e-06	0.00254964	21.1573	29.788	23.7023
rs148894582	G	A	G	A	-0.292453	0.106718	0.0129169	0.012061	FALSE	FALSE	FALSE	ieu-a-7	10	60380180	0.0594607	184305	0.0726909	Coronary heart disease || id:ieu-a-7	Coronary heart disease	Coronary heart disease || ||	TRUE	igd	10	58620420	0.0652677	7.43554e-06	GCST90199651	Docosahexaenoate DHA; 22:6n3 levels	8279	2	TRUE			0.00241986	8279	1.74773e-05	184305	TRUE	6.08758e-05	0.00218099	18.0915	29.788	20.0778
rs174603	A	G	A	G	-0.0936123	-0.031398	0.318542	0.31015	FALSE	FALSE	FALSE	ieu-a-7	11	61626206	0.0107292	184305	0.00342886	Coronary heart disease || id:ieu-a-7	Coronary heart disease	Coronary heart disease || ||	TRUE	igd	11	61858734	0.015879	3.73866e-09	GCST90199651	Docosahexaenoate DHA; 22:6n3 levels	8279	2	TRUE			0.00418145	8279	4.6464e-05	184305	TRUE	2.5193e-07	0.00380454	31.6104	29.788	34.7552
rs187828726	G	T	G	T	-0.221919	0.002626	0.023446	0.023217	FALSE	FALSE	FALSE	ieu-a-7	6	158927379	0.0371149	184305	0.943594	Coronary heart disease || id:ieu-a-7	Coronary heart disease	Coronary heart disease || ||	TRUE	igd	6	158506347	0.0487912	5.4067e-06	GCST90199651	Docosahexaenoate DHA; 22:6n3 levels	8279	2	TRUE			0.00249315	8279	2.71619e-08	184305	TRUE	9.30396e-06	0.00225519	18.7084	29.788	20.6874
rs1934826	A	G	A	G	-0.065497	0.010407	0.454628	0.446022	FALSE	FALSE	FALSE	ieu-a-7	13	76524545	0.0093431	184305	0.265333	Coronary heart disease || id:ieu-a-7	Coronary heart disease	Coronary heart disease || ||	TRUE	igd	13	75950409	0.0148097	9.75301e-06	GCST90199651	Docosahexaenoate DHA; 22:6n3 levels	8279	2	TRUE			0.0023575	8279	6.73184e-06	184305	TRUE	4.24673e-05	0.00212727	17.6449	29.788	19.5592
rs34736275	A	G	A	G	0.0734802	0.012611	0.327588	0.30854	FALSE	FALSE	FALSE	ieu-a-7	7	80200343	0.0107357	184305	0.240123	Coronary heart disease || id:ieu-a-7	Coronary heart disease	Coronary heart disease || ||	TRUE	igd	7	80571027	0.0160133	4.46044e-06	GCST90199651	Docosahexaenoate DHA; 22:6n3 levels	8279	2	TRUE			0.00253748	8279	7.48691e-06	184305	TRUE	2.20227e-05	0.00237867	19.7352	29.788	21.0562
rs3731644	C	T	C	T	0.110271	0.012077	0.100677	0.154913	FALSE	FALSE	FALSE	ieu-a-7	2	235949877	0.0132776	184305	0.363045	Coronary heart disease || id:ieu-a-7	Coronary heart disease	Coronary heart disease || ||	TRUE	igd	2	235041233	0.0242799	5.58135e-06	GCST90199651	Docosahexaenoate DHA; 22:6n3 levels	8279	2	TRUE			0.00248585	8279	4.48895e-06	184305	TRUE	2.11559e-05	0.00220191	18.2654	29.788	20.6267
rs6564915	G	T	G	T	0.101809	0.016701	0.856833	0.829703	FALSE	FALSE	FALSE	ieu-a-7	16	81808233	0.0156359	184305	0.285466	Coronary heart disease || id:ieu-a-7	Coronary heart disease	Coronary heart disease || ||	TRUE	igd	16	81774628	0.0218657	3.2225e-06	GCST90199651	Docosahexaenoate DHA; 22:6n3 levels	8279	2	TRUE			0.00261238	8279	6.19019e-06	184305	TRUE	1.48249e-05	0.00254297	21.1018	29.788	21.6793
rs73045049	A	G	A	G	-0.182777	-0.071153	0.0352002	0.022355	FALSE	FALSE	FALSE	ieu-a-7	7	2698348	0.0534199	184305	0.182874	Coronary heart disease || id:ieu-a-7	Coronary heart disease	Coronary heart disease || ||	TRUE	igd	7	2658714	0.040097	5.15535e-06	GCST90199651	Docosahexaenoate DHA; 22:6n3 levels	8279	2	TRUE			0.00250413	8279	9.62595e-06	184305	TRUE	2.90107e-05	0.00226911	18.8241	29.788	20.7787
rs73500833	T	C	T	C	-0.271564	0.012081	0.0153501	0.017958	FALSE	FALSE	FALSE	ieu-a-7	13	27330213	0.0374245	184305	0.746839	Coronary heart disease || id:ieu-a-7	Coronary heart disease	Coronary heart disease || ||	TRUE	igd	13	26756076	0.0598372	5.66876e-06	GCST90199651	Docosahexaenoate DHA; 22:6n3 levels	8279	2	TRUE			0.00248227	8279	5.65407e-07	184305	TRUE	1.23812e-05	0.00222929	18.4931	29.788	20.5969
rs77207094	C	T	C	T	-0.248645	0.087102	0.0186215	0.021229	FALSE	FALSE	FALSE	ieu-a-7	5	11520911	0.0400065	184305	0.0294659	Coronary heart disease || id:ieu-a-7	Coronary heart disease	Coronary heart disease || ||	TRUE	igd	5	11520799	0.0546737	5.42114e-06	GCST90199651	Docosahexaenoate DHA; 22:6n3 levels	8279	2	TRUE			0.00249256	8279	2.57189e-05	184305	TRUE	6.45446e-05	0.00225965	18.7455	29.788	20.6825
rs8523	A	G	A	G	-0.0784228	0.002573	0.429891	0.478606	FALSE	FALSE	FALSE	ieu-a-7	6	10981053	0.0095712	184305	0.788063	Coronary heart disease || id:ieu-a-7	Coronary heart disease	Coronary heart disease || ||	TRUE	igd	6	10980820	0.0147676	1.09343e-07	GCST90199651	Docosahexaenoate DHA; 22:6n3 levels	8279	2	TRUE			0.00339559	8279	3.92116e-07	184305	TRUE	2.80477e-07	0.00301461	25.0274	29.788	28.201
rs117022836	T	C	T	C	-0.228706	0.034799	0.0293313	0.013983	FALSE	FALSE	FALSE	ieu-a-7	11	37672585	0.0582701	184305	0.550373	Coronary heart disease || id:ieu-a-7	Coronary heart disease	Coronary heart disease || ||	TRUE	igd	11	37651035	0.0457893	5.89112e-07	GCST90199652	1-stearoyl-2-oleoyl-GPS (18:0/18:1) levels	8055	2	TRUE			0.00308835	8055	1.93512e-06	184305	TRUE	1.89718e-06	0.00297843	24.057	29.788	24.9475
rs118096873	A	G	A	G	-0.330974	-0.021115	0.0110821	0.025799	FALSE	FALSE	FALSE	ieu-a-7	8	49639142	0.0381012	184305	0.579454	Coronary heart disease || id:ieu-a-7	Coronary heart disease	Coronary heart disease || ||	TRUE	igd	8	48726583	0.0743846	8.6072e-06	GCST90199652	1-stearoyl-2-oleoyl-GPS (18:0/18:1) levels	8055	2	TRUE			0.00245244	8055	1.66637e-06	184305	TRUE	2.23585e-05	0.00240104	19.3821	29.788	19.798
rs12652405	A	T	A	T	-0.185696	0.008768	0.0360831	0.046868	FALSE	TRUE	FALSE	ieu-a-7	5	56255552	0.0218755	184305	0.688557	Coronary heart disease || id:ieu-a-7	Coronary heart disease	Coronary heart disease || ||	TRUE	igd	5	56959725	0.041852	9.12308e-06	GCST90199652	1-stearoyl-2-oleoyl-GPS (18:0/18:1) levels	8055	2	TRUE			0.00243868	8055	8.7167e-07	184305	TRUE	2.05282e-05	0.00239871	19.3633	29.788	19.6867
rs12965592	C	G	C	G	-0.109671	0.018356	0.113639	0.102751	FALSE	TRUE	FALSE	ieu-a-7	18	100297	0.0246954	184305	0.457303	Coronary heart disease || id:ieu-a-7	Coronary heart disease	Coronary heart disease || ||	TRUE	igd	18	100297	0.0247405	9.30014e-06	GCST90199652	1-stearoyl-2-oleoyl-GPS (18:0/18:1) levels	8055	2	TRUE			0.00243417	8055	2.99771e-06	184305	TRUE	2.85201e-05	0.00242299	19.5597	29.788	19.6502
rs13234046	A	G	A	G	-0.0842069	0.001521	0.223223	0.209486	FALSE	FALSE	FALSE	ieu-a-7	7	11011612	0.01186	184305	0.897954	Coronary heart disease || id:ieu-a-7	Coronary heart disease	Coronary heart disease || ||	TRUE	igd	7	10971985	0.0189265	8.62088e-06	GCST90199652	1-stearoyl-2-oleoyl-GPS (18:0/18:1) levels	8055	2	TRUE			0.00245206	8055	8.92394e-08	184305	TRUE	1.51329e-05	0.00245901	19.8512	29.788	19.795
rs1354034	C	T	C	T	0.138779	0.004969	0.609726	0.578315	FALSE	FALSE	FALSE	ieu-a-7	3	56849749	0.0095831	184305	0.604099	Coronary heart disease || id:ieu-a-7	Coronary heart disease	Coronary heart disease || ||	TRUE	igd	3	56815721	0.0159732	3.68039e-18	GCST90199652	1-stearoyl-2-oleoyl-GPS (18:0/18:1) levels	8055	2	TRUE			0.00928654	8055	1.45879e-06	184305	TRUE	5.08963e-17	0.00916604	74.497	29.788	75.4855
rs138806707	C	T	C	T	-0.258703	0.035695	0.0200426	0.016083	FALSE	FALSE	FALSE	ieu-a-7	8	20856652	0.0430688	184305	0.407223	Coronary heart disease || id:ieu-a-7	Coronary heart disease	Coronary heart disease || ||	TRUE	igd	8	20999141	0.0555882	3.25682e-06	GCST90199652	1-stearoyl-2-oleoyl-GPS (18:0/18:1) levels	8055	2	TRUE			0.00268234	8055	3.72696e-06	184305	TRUE	1.16745e-05	0.00262902	21.2273	29.788	21.659
rs154803	A	T	A	T	0.228935	-0.048284	0.975691	0.958008	FALSE	TRUE	FALSE	ieu-a-7	5	92125200	0.035367	184305	0.172182	Coronary heart disease || id:ieu-a-7	Coronary heart disease	Coronary heart disease || ||	TRUE	igd	5	92789493	0.0506099	6.08206e-06	GCST90199652	1-stearoyl-2-oleoyl-GPS (18:0/18:1) levels	8055	2	TRUE			0.00253451	8055	1.01128e-05	184305	TRUE	3.37799e-05	0.00248619	20.0712	29.788	20.4623
rs17831607	G	A	G	A	-0.106904	-0.002846	0.139338	0.119105	FALSE	FALSE	FALSE	ieu-a-7	6	134684539	0.0150536	184305	0.850048	Coronary heart disease || id:ieu-a-7	Coronary heart disease	Coronary heart disease || ||	TRUE	igd	6	134363401	0.0224635	1.94566e-06	GCST90199652	1-stearoyl-2-oleoyl-GPS (18:0/18:1) levels	8055	2	TRUE			0.0028045	8055	1.93935e-07	184305	TRUE	3.88977e-06	0.00274107	22.1345	29.788	22.6482
rs2055570	G	A	G	A	-0.135106	-0.03481	0.927349	0.930219	FALSE	FALSE	FALSE	ieu-a-7	2	49343909	0.0232268	184305	0.133952	Coronary heart disease || id:ieu-a-7	Coronary heart disease	Coronary heart disease || ||	TRUE	igd	2	49116770	0.0304665	9.22546e-06	GCST90199652	1-stearoyl-2-oleoyl-GPS (18:0/18:1) levels	8055	2	TRUE			0.00243606	8055	1.21869e-05	184305	TRUE	5.52798e-05	0.0024596	19.856	29.788	19.6655
rs55731338	A	G	A	G	-0.21443	0.049135	0.0289729	0.029582	FALSE	FALSE	FALSE	ieu-a-7	6	35140992	0.0335464	184305	0.143007	Coronary heart disease || id:ieu-a-7	Coronary heart disease	Coronary heart disease || ||	TRUE	igd	6	35173215	0.0462655	3.57332e-06	GCST90199652	1-stearoyl-2-oleoyl-GPS (18:0/18:1) levels	8055	2	TRUE			0.00266037	8055	1.164e-05	184305	TRUE	2.28795e-05	0.00258717	20.8885	29.788	21.4811
rs55823223	A	G	A	G	-0.10594	-0.016334	0.150056	0.117036	FALSE	FALSE	FALSE	ieu-a-7	17	73890363	0.0151796	184305	0.281906	Coronary heart disease || id:ieu-a-7	Coronary heart disease	Coronary heart disease || ||	TRUE	igd	17	75894282	0.0217392	1.09794e-06	GCST90199652	1-stearoyl-2-oleoyl-GPS (18:0/18:1) levels	8055	2	TRUE			0.00294033	8055	6.28245e-06	184305	TRUE	5.43275e-06	0.00286282	23.1205	29.788	23.7483
rs56058673	T	C	T	C	-0.155282	-0.002134	0.0591344	0.044676	FALSE	FALSE	FALSE	ieu-a-7	22	36477747	0.0282074	184305	0.939694	Coronary heart disease || id:ieu-a-7	Coronary heart disease	Coronary heart disease || ||	TRUE	igd	22	36081699	0.0336363	3.90287e-06	GCST90199652	1-stearoyl-2-oleoyl-GPS (18:0/18:1) levels	8055	2	TRUE			0.00263949	8055	3.10549e-08	184305	TRUE	6.76047e-06	0.00268312	21.6653	29.788	21.3121
rs6871550	C	T	C	T	0.0882151	0.010495	0.205068	0.203217	FALSE	FALSE	FALSE	ieu-a-7	5	399211	0.0131016	184305	0.423104	Coronary heart disease || id:ieu-a-7	Coronary heart disease	Coronary heart disease || ||	TRUE	igd	5	399096	0.0195516	6.4248e-06	GCST90199652	1-stearoyl-2-oleoyl-GPS (18:0/18:1) levels	8055	2	TRUE			0.00252155	8055	3.48163e-06	184305	TRUE	2.13348e-05	0.00253714	20.4835	29.788	20.3574
rs7161063	G	C	G	C	-0.188363	-0.038391	0.0367098	0.062845	FALSE	TRUE	FALSE	ieu-a-7	14	88746516	0.0191761	184305	0.0452814	Coronary heart disease || id:ieu-a-7	Coronary heart disease	Coronary heart disease || ||	TRUE	igd	14	88280172	0.0410966	4.57413e-06	GCST90199652	1-stearoyl-2-oleoyl-GPS (18:0/18:1) levels	8055	2	TRUE			0.0026019	8055	2.17469e-05	184305	TRUE	4.60877e-05	0.00250934	20.2586	29.788	21.0077
rs72761668	G	A	G	A	-0.173508	-0.045213	0.0422211	0.030876	FALSE	FALSE	FALSE	ieu-a-7	15	102265942	0.0405801	184305	0.265208	Coronary heart disease || id:ieu-a-7	Coronary heart disease	Coronary heart disease || ||	TRUE	igd	15	101725739	0.0382524	5.73656e-06	GCST90199652	1-stearoyl-2-oleoyl-GPS (18:0/18:1) levels	8055	2	TRUE			0.00254833	8055	6.73543e-06	184305	TRUE	2.55595e-05	0.0024348	19.6553	29.788	20.5741
rs78365257	C	G	C	G	-0.294515	0.000658	0.0146308	0.01532	FALSE	TRUE	FALSE	ieu-a-7	3	116249454	0.0448394	184305	0.988292	Coronary heart disease || id:ieu-a-7	Coronary heart disease	Coronary heart disease || ||	TRUE	igd	3	116530607	0.065059	5.98576e-06	GCST90199652	1-stearoyl-2-oleoyl-GPS (18:0/18:1) levels	8055	2	TRUE			0.00253827	8055	1.16842e-09	184305	TRUE	9.60077e-06	0.00250099	20.191	29.788	20.4927
rs78453362	A	G	A	G	0.154741	-0.018687	0.0541305	0.050708	FALSE	FALSE	FALSE	ieu-a-7	3	78740009	0.024614	184305	0.447731	Coronary heart disease || id:ieu-a-7	Coronary heart disease	Coronary heart disease || ||	TRUE	igd	3	78690859	0.0347262	8.34918e-06	GCST90199652	1-stearoyl-2-oleoyl-GPS (18:0/18:1) levels	8055	2	TRUE			0.00245963	8055	3.12738e-06	184305	TRUE	2.61803e-05	0.00245196	19.7942	29.788	19.8562
rs80312835	G	A	G	A	0.296795	-0.027864	0.0139821	0.022723	FALSE	FALSE	FALSE	ieu-a-7	10	112177595	0.033805	184305	0.409793	Coronary heart disease || id:ieu-a-7	Coronary heart disease	Coronary heart disease || ||	TRUE	igd	10	110417837	0.0661347	7.19855e-06	GCST90199652	1-stearoyl-2-oleoyl-GPS (18:0/18:1) levels	8055	2	TRUE			0.00249466	8055	3.6863e-06	184305	TRUE	2.4208e-05	0.00242885	19.6071	29.788	20.1398
rs10868484	C	T	C	T	0.0967565	-0.000255	0.160135	0.176819	FALSE	FALSE	FALSE	ieu-a-7	9	89391655	0.0122043	184305	0.98333	Coronary heart disease || id:ieu-a-7	Coronary heart disease	Coronary heart disease || ||	TRUE	igd	9	86776740	0.0211482	4.75862e-06	GCST90199653	1-myristoyl-2-palmitoyl-gpc (14:0/16:0) levels	8271	2	TRUE			0.00252501	8271	2.36877e-09	184305	TRUE	7.84453e-06	0.00251818	20.8754	29.788	20.9321
rs114128846	A	G	A	G	0.147692	-0.029896	0.064399	0.062505	FALSE	FALSE	FALSE	ieu-a-7	2	119038035	0.020472	184305	0.144198	Coronary heart disease || id:ieu-a-7	Coronary heart disease	Coronary heart disease || ||	TRUE	igd	2	118280459	0.031243	2.27645e-06	GCST90199653	1-myristoyl-2-palmitoyl-gpc (14:0/16:0) levels	8271	2	TRUE			0.00269515	8271	1.15709e-05	184305	TRUE	1.56272e-05	0.00262853	21.7926	29.788	22.3464
rs116926922	T	G	T	G	0.200887	0.027304	0.0329258	0.028418	FALSE	FALSE	FALSE	ieu-a-7	6	160379710	0.0319692	184305	0.393065	Coronary heart disease || id:ieu-a-7	Coronary heart disease	Coronary heart disease || ||	TRUE	igd	6	159958678	0.0425847	2.3894e-06	GCST90199653	1-myristoyl-2-palmitoyl-gpc (14:0/16:0) levels	8271	2	TRUE			0.00268396	8271	3.95781e-06	184305	TRUE	9.17929e-06	0.00256998	21.3059	29.788	22.2534
rs12331085	A	G	A	G	-0.0932487	-0.000163	0.264501	0.255062	FALSE	FALSE	FALSE	ieu-a-7	4	172802850	0.0105814	184305	0.98771	Coronary heart disease || id:ieu-a-7	Coronary heart disease	Coronary heart disease || ||	TRUE	igd	4	171881699	0.0176113	1.19123e-07	GCST90199653	1-myristoyl-2-palmitoyl-gpc (14:0/16:0) levels	8271	2	TRUE			0.00337893	8271	1.28753e-09	184305	TRUE	2.29773e-07	0.00338318	28.0705	29.788	28.0351
rs142273297	A	G	A	G	0.275401	-0.007186	0.0154583	0.010723	FALSE	FALSE	FALSE	ieu-a-7	20	3591167	0.0689059	184305	0.916941	Coronary heart disease || id:ieu-a-7	Coronary heart disease	Coronary heart disease || ||	TRUE	igd	20	3610520	0.0618858	8.58129e-06	GCST90199653	1-myristoyl-2-palmitoyl-gpc (14:0/16:0) levels	8271	2	TRUE			0.00238923	8271	5.90105e-08	184305	TRUE	1.49137e-05	0.00230864	19.1343	29.788	19.8038
rs147325198	A	G	A	G	0.312097	0.014964	0.014061	0.025346	FALSE	FALSE	FALSE	ieu-a-7	5	9684823	0.0406724	184305	0.712937	Coronary heart disease || id:ieu-a-7	Coronary heart disease	Coronary heart disease || ||	TRUE	igd	5	9684711	0.065423	1.83812e-06	GCST90199653	1-myristoyl-2-palmitoyl-gpc (14:0/16:0) levels	8271	2	TRUE			0.00274455	8271	7.34451e-07	184305	TRUE	4.46956e-06	0.00270069	22.3925	29.788	22.7572
rs148311684	A	G	A	G	-0.303145	-0.041596	0.0126404	0.012665	FALSE	FALSE	FALSE	ieu-a-7	1	4948740	0.0637265	184305	0.513932	Coronary heart disease || id:ieu-a-7	Coronary heart disease	Coronary heart disease || ||	TRUE	igd	1	4888680	0.0683667	9.24546e-06	GCST90199653	1-myristoyl-2-palmitoyl-gpc (14:0/16:0) levels	8271	2	TRUE			0.00237207	8271	2.31169e-06	184305	TRUE	2.66161e-05	0.00229386	19.0115	29.788	19.6613
rs17583806	A	G	A	G	0.13245	-0.02024	0.0741304	0.057338	FALSE	FALSE	FALSE	ieu-a-7	13	105431517	0.0218809	184305	0.354962	Coronary heart disease || id:ieu-a-7	Coronary heart disease	Coronary heart disease || ||	TRUE	igd	13	104779166	0.0289892	4.90168e-06	GCST90199653	1-myristoyl-2-palmitoyl-gpc (14:0/16:0) levels	8271	2	TRUE			0.00251816	8271	4.64255e-06	184305	TRUE	1.9031e-05	0.00240813	19.9609	29.788	20.8752
rs28704912	A	C	A	C	0.130285	-0.016753	0.0874939	0.102121	FALSE	FALSE	FALSE	ieu-a-7	18	7928034	0.0153936	184305	0.27646	Coronary heart disease || id:ieu-a-7	Coronary heart disease	Coronary heart disease || ||	TRUE	igd	18	7928036	0.0272362	1.72261e-06	GCST90199653	1-myristoyl-2-palmitoyl-gpc (14:0/16:0) levels	8271	2	TRUE			0.00275958	8271	6.42643e-06	184305	TRUE	8.51682e-06	0.00271039	22.4732	29.788	22.8821
rs2996477	C	T	C	T	0.131699	0.02491	0.924975	0.845242	FALSE	FALSE	FALSE	ieu-a-7	1	92386234	0.0142194	184305	0.0798031	Coronary heart disease || id:ieu-a-7	Coronary heart disease	Coronary heart disease || ||	TRUE	igd	1	91920677	0.0294263	7.62133e-06	GCST90199653	1-myristoyl-2-palmitoyl-gpc (14:0/16:0) levels	8271	2	TRUE			0.00241652	8271	1.66512e-05	184305	TRUE	5.98505e-05	0.0024073	19.954	29.788	20.0306
rs4485089	G	A	G	A	-0.080974	-0.012563	0.243905	0.270823	FALSE	FALSE	FALSE	ieu-a-7	11	12431361	0.0106488	184305	0.238096	Coronary heart disease || id:ieu-a-7	Coronary heart disease	Coronary heart disease || ||	TRUE	igd	11	12409814	0.0179663	6.57522e-06	GCST90199653	1-myristoyl-2-palmitoyl-gpc (14:0/16:0) levels	8271	2	TRUE			0.0024505	8271	7.55179e-06	184305	TRUE	3.14569e-05	0.00241834	20.0458	29.788	20.313
rs4698782	C	T	C	T	-0.0728829	-0.009599	0.439682	0.432669	FALSE	FALSE	FALSE	ieu-a-7	4	110655281	0.0094495	184305	0.309716	Coronary heart disease || id:ieu-a-7	Coronary heart disease	Coronary heart disease || ||	TRUE	igd	4	109734125	0.0154847	2.51668e-06	GCST90199653	1-myristoyl-2-palmitoyl-gpc (14:0/16:0) levels	8271	2	TRUE			0.00267196	8271	5.59886e-06	184305	TRUE	1.12416e-05	0.00261731	21.6993	29.788	22.1537
rs4975528	A	G	A	G	0.0782659	-0.000475	0.27399	0.274351	FALSE	FALSE	FALSE	ieu-a-7	5	1017915	0.0119371	184305	0.968259	Coronary heart disease || id:ieu-a-7	Coronary heart disease	Coronary heart disease || ||	TRUE	igd	5	1017800	0.0173632	6.55743e-06	GCST90199653	1-myristoyl-2-palmitoyl-gpc (14:0/16:0) levels	8271	2	TRUE			0.00245113	8271	8.59127e-09	184305	TRUE	1.08536e-05	0.00243698	20.2006	29.788	20.3182
rs79292294	G	T	G	T	0.217589	0.035642	0.0254391	0.02699	FALSE	FALSE	FALSE	ieu-a-7	11	38237522	0.0360655	184305	0.323027	Coronary heart disease || id:ieu-a-7	Coronary heart disease	Coronary heart disease || ||	TRUE	igd	11	38215972	0.0488736	8.50461e-06	GCST90199653	1-myristoyl-2-palmitoyl-gpc (14:0/16:0) levels	8271	2	TRUE			0.00239129	8271	5.29914e-06	184305	TRUE	3.34401e-05	0.00234755	19.4576	29.788	19.821
rs79682447	A	G	A	G	-0.189114	-0.010076	0.0406628	0.037852	FALSE	FALSE	FALSE	ieu-a-7	4	2262104	0.0250713	184305	0.687762	Coronary heart disease || id:ieu-a-7	Coronary heart disease	Coronary heart disease || ||	TRUE	igd	4	2260377	0.0384282	8.59963e-07	GCST90199653	1-myristoyl-2-palmitoyl-gpc (14:0/16:0) levels	8271	2	TRUE			0.00292028	8271	8.76375e-07	184305	TRUE	2.26173e-06	0.00279027	23.1373	29.788	24.2185
rs9349828	C	T	C	T	0.073257	-0.0036	0.312933	0.315153	FALSE	FALSE	FALSE	ieu-a-7	6	56424232	0.0101415	184305	0.722607	Coronary heart disease || id:ieu-a-7	Coronary heart disease	Coronary heart disease || ||	TRUE	igd	6	56559434	0.0164631	8.59628e-06	GCST90199653	1-myristoyl-2-palmitoyl-gpc (14:0/16:0) levels	8271	2	TRUE			0.00238882	8271	6.83704e-07	184305	TRUE	1.88882e-05	0.0023077	19.1265	29.788	19.8004
rs10194878	C	T	C	T	0.0812524	-0.005931	0.283725	0.316653	FALSE	FALSE	FALSE	ieu-a-7	2	139397458	0.0103837	184305	0.567877	Coronary heart disease || id:ieu-a-7	Coronary heart disease	Coronary heart disease || ||	TRUE	igd	2	138639888	0.0177378	4.63326e-06	GCST90199654	Paraxanthine levels in elite athletes	7840	2	TRUE			0.00266997	7840	1.77018e-06	184305	TRUE	1.2498e-05	0.00268337	21.0888	29.788	20.9833
rs10459799	G	C	G	C	-0.103929	0.013386	0.147324	0.173881	FALSE	TRUE	FALSE	ieu-a-7	16	59997062	0.012187	184305	0.272035	Coronary heart disease || id:ieu-a-7	Coronary heart disease	Coronary heart disease || ||	TRUE	igd	16	59963158	0.0224526	3.67743e-06	GCST90199654	Paraxanthine levels in elite athletes	7840	2	TRUE			0.00272615	7840	6.54595e-06	184305	TRUE	1.63807e-05	0.00271369	21.3278	29.788	21.426
rs10509810	G	A	G	A	-0.0767333	0.007499	0.408098	0.409567	FALSE	FALSE	FALSE	ieu-a-7	10	107765356	0.0092975	184305	0.419918	Coronary heart disease || id:ieu-a-7	Coronary heart disease	Coronary heart disease || ||	TRUE	igd	10	106005598	0.0163837	2.82009e-06	GCST90199654	Paraxanthine levels in elite athletes	7840	2	TRUE			0.00279077	7840	3.52972e-06	184305	TRUE	9.79356e-06	0.00284454	22.3591	29.788	21.9353
rs11032948	T	C	T	C	0.0933967	0.001198	0.245032	0.235857	FALSE	FALSE	FALSE	ieu-a-7	11	34972897	0.0116579	184305	0.918151	Coronary heart disease || id:ieu-a-7	Coronary heart disease	Coronary heart disease || ||	TRUE	igd	11	34951350	0.0187015	5.91196e-07	GCST90199654	Paraxanthine levels in elite athletes	7840	2	TRUE			0.00317194	7840	5.72981e-08	184305	TRUE	1.13014e-06	0.00322734	25.3778	29.788	24.9408
rs112492033	A	G	A	G	-0.270033	0.010557	0.0190433	0.019515	FALSE	FALSE	FALSE	ieu-a-7	15	80735234	0.0358722	184305	0.768532	Coronary heart disease || id:ieu-a-7	Coronary heart disease	Coronary heart disease || ||	TRUE	igd	15	80442893	0.0581759	3.45602e-06	GCST90199654	Paraxanthine levels in elite athletes	7840	2	TRUE			0.00274126	7840	4.69929e-07	184305	TRUE	7.31844e-06	0.0027243	21.4114	29.788	21.545
rs115087674	T	A	T	A	-0.308828	0.030028	0.0133803	0.014605	FALSE	TRUE	FALSE	ieu-a-7	4	156691821	0.050261	184305	0.550213	Coronary heart disease || id:ieu-a-7	Coronary heart disease	Coronary heart disease || ||	TRUE	igd	4	155770669	0.0689018	7.38941e-06	GCST90199654	Paraxanthine levels in elite athletes	7840	2	TRUE			0.00255656	7840	1.93668e-06	184305	TRUE	1.98142e-05	0.00251813	19.787	29.788	20.0896
rs115520044	A	G	A	G	0.30686	0.071419	0.0170535	0.031174	FALSE	FALSE	FALSE	ieu-a-7	14	49955007	0.0304223	184305	0.0188956	Coronary heart disease || id:ieu-a-7	Coronary heart disease	Coronary heart disease || ||	TRUE	igd	14	49488289	0.0617075	6.59906e-07	GCST90199654	Paraxanthine levels in elite athletes	7840	2	TRUE			0.00314508	7840	2.99018e-05	184305	TRUE	1.11613e-05	0.00315685	24.8217	29.788	24.7289
rs11599254	T	C	T	C	0.137987	-0.005743	0.0840498	0.087332	FALSE	FALSE	FALSE	ieu-a-7	10	29217961	0.0162877	184305	0.724389	Coronary heart disease || id:ieu-a-7	Coronary heart disease	Coronary heart disease || ||	TRUE	igd	10	28929032	0.0286132	1.41769e-06	GCST90199654	Paraxanthine levels in elite athletes	7840	2	TRUE			0.00295836	7840	6.74567e-07	184305	TRUE	3.33102e-06	0.00293167	23.046	29.788	23.2565
rs13243315	C	T	C	T	-0.0931508	0.001842	0.205073	0.185663	FALSE	FALSE	FALSE	ieu-a-7	7	25514053	0.0120131	184305	0.878136	Coronary heart disease || id:ieu-a-7	Coronary heart disease	Coronary heart disease || ||	TRUE	igd	7	25474434	0.020119	3.6566e-06	GCST90199654	Paraxanthine levels in elite athletes	7840	2	TRUE			0.00272753	7840	1.27566e-07	184305	TRUE	6.75507e-06	0.00282904	22.2369	29.788	21.4368
rs143167061	T	C	T	C	-0.255726	0.032994	0.0194548	0.019176	FALSE	FALSE	FALSE	ieu-a-7	11	13208451	0.0372811	184305	0.376153	Coronary heart disease || id:ieu-a-7	Coronary heart disease	Coronary heart disease || ||	TRUE	igd	11	13186904	0.057744	9.48373e-06	GCST90199654	Paraxanthine levels in elite athletes	7840	2	TRUE			0.002496	7840	4.2497e-06	184305	TRUE	3.23105e-05	0.00249502	19.6049	29.788	19.6126
rs150047778	C	T	C	T	-0.357145	0.034322	0.0108029	0.014774	FALSE	FALSE	FALSE	ieu-a-7	7	115758311	0.0422095	184305	0.416141	Coronary heart disease || id:ieu-a-7	Coronary heart disease	Coronary heart disease || ||	TRUE	igd	7	116118257	0.0775345	4.09938e-06	GCST90199654	Paraxanthine levels in elite athletes	7840	2	TRUE			0.00269973	7840	3.58749e-06	184305	TRUE	1.39395e-05	0.0027261	21.4256	29.788	21.2177
rs1503609	A	G	A	G	0.073513	0.002531	0.352215	0.359604	FALSE	FALSE	FALSE	ieu-a-7	4	127768849	0.009531	184305	0.790582	Coronary heart disease || id:ieu-a-7	Coronary heart disease	Coronary heart disease || ||	TRUE	igd	4	126847694	0.0166079	9.58302e-06	GCST90199654	Paraxanthine levels in elite athletes	7840	2	TRUE			0.0024935	7840	3.82626e-07	184305	TRUE	1.87344e-05	0.00246602	19.3765	29.788	19.5929
rs150604675	T	C	T	C	-0.211642	-0.006651	0.0306812	0.061773	FALSE	FALSE	FALSE	ieu-a-7	6	107436259	0.027258	184305	0.807229	Coronary heart disease || id:ieu-a-7	Coronary heart disease	Coronary heart disease || ||	TRUE	igd	6	107115055	0.0468436	6.24082e-06	GCST90199654	Paraxanthine levels in elite athletes	7840	2	TRUE			0.00259758	7840	3.23038e-07	184305	TRUE	1.22284e-05	0.00266424	20.9381	29.788	20.4128
rs17653722	T	G	T	G	-0.0950999	0.020731	0.170187	0.166053	FALSE	FALSE	FALSE	ieu-a-7	12	52587518	0.0126269	184305	0.100629	Coronary heart disease || id:ieu-a-7	Coronary heart disease	Coronary heart disease || ||	TRUE	igd	12	52193734	0.0212194	7.40329e-06	GCST90199654	Paraxanthine levels in elite athletes	7840	2	TRUE			0.0025561	7840	1.46254e-05	184305	TRUE	4.99934e-05	0.00255445	20.073	29.788	20.086
rs2245730	C	A	C	A	-0.0769941	0.00117	0.434712	0.479761	FALSE	FALSE	FALSE	ieu-a-7	21	44125328	0.0095245	184305	0.902233	Coronary heart disease || id:ieu-a-7	Coronary heart disease	Coronary heart disease || ||	TRUE	igd	21	42705218	0.0162704	2.22152e-06	GCST90199654	Paraxanthine levels in elite athletes	7840	2	TRUE			0.00284888	7840	8.18757e-08	184305	TRUE	4.0786e-06	0.00291351	22.9028	29.788	22.3933
rs2274148	T	C	T	C	0.199304	-0.00591	0.0333248	0.038725	FALSE	FALSE	FALSE	ieu-a-7	13	49853124	0.0248931	184305	0.812335	Coronary heart disease || id:ieu-a-7	Coronary heart disease	Coronary heart disease || ||	TRUE	igd	13	49278988	0.0441846	6.46105e-06	GCST90199654	Paraxanthine levels in elite athletes	7840	2	TRUE			0.00258916	7840	3.05833e-07	184305	TRUE	1.25606e-05	0.00255923	20.1108	29.788	20.3465
rs28491088	C	A	C	A	0.0994323	0.004071	0.15482	0.168714	FALSE	FALSE	FALSE	ieu-a-7	15	25156314	0.0124944	184305	0.744555	Coronary heart disease || id:ieu-a-7	Coronary heart disease	Coronary heart disease || ||	TRUE	igd	15	24911167	0.0223294	8.46886e-06	GCST90199654	Paraxanthine levels in elite athletes	7840	2	TRUE			0.00252347	7840	5.76022e-07	184305	TRUE	1.76038e-05	0.00258739	20.3325	29.788	19.829
rs34563893	C	T	C	T	-0.343882	0.041596	0.012781	0.020612	FALSE	FALSE	FALSE	ieu-a-7	12	98432393	0.0434522	184305	0.338425	Coronary heart disease || id:ieu-a-7	Coronary heart disease	Coronary heart disease || ||	TRUE	igd	12	98038615	0.0708587	1.21566e-06	GCST90199654	Paraxanthine levels in elite athletes	7840	2	TRUE			0.00299588	7840	4.97216e-06	184305	TRUE	5.18772e-06	0.0029842	23.4601	29.788	23.5523
rs56113850	C	T	C	T	-0.111197	-0.005893	0.573947	0.521187	FALSE	FALSE	FALSE	ieu-a-7	19	41353107	0.0113668	184305	0.604152	Coronary heart disease || id:ieu-a-7	Coronary heart disease	Coronary heart disease || ||	TRUE	igd	19	40847202	0.0159364	3.00367e-12	GCST90199654	Paraxanthine levels in elite athletes	7840	2	TRUE			0.00617321	7840	1.45836e-06	184305	TRUE	1.79775e-11	0.00604716	47.686	29.788	48.6862
rs57526497	C	A	C	A	-0.154204	-0.00073	0.940958	0.90565	FALSE	FALSE	FALSE	ieu-a-7	17	77545900	0.0189219	184305	0.969225	Coronary heart disease || id:ieu-a-7	Coronary heart disease	Coronary heart disease || ||	TRUE	igd	17	79549816	0.0338631	5.27008e-06	GCST90199654	Paraxanthine levels in elite athletes	7840	2	TRUE			0.00263867	7840	8.07577e-09	184305	TRUE	8.5922e-06	0.00264212	20.7638	29.788	20.7366
rs62017761	G	T	G	T	-0.0738812	-0.011542	0.4716	0.478076	FALSE	FALSE	FALSE	ieu-a-7	16	6552504	0.0092757	184305	0.213381	Coronary heart disease || id:ieu-a-7	Coronary heart disease	Coronary heart disease || ||	TRUE	igd	16	6502503	0.0158913	3.33291e-06	GCST90199654	Paraxanthine levels in elite athletes	7840	2	TRUE			0.0027501	7840	8.40103e-06	184305	TRUE	1.7105e-05	0.00272041	21.3807	29.788	21.6147
rs643104	C	T	C	T	-0.081713	0.005161	0.336248	0.318276	FALSE	FALSE	FALSE	ieu-a-7	11	118567125	0.0102197	184305	0.613556	Coronary heart disease || id:ieu-a-7	Coronary heart disease	Coronary heart disease || ||	TRUE	igd	11	118696416	0.0174577	2.86002e-06	GCST90199654	Paraxanthine levels in elite athletes	7840	2	TRUE			0.00278735	7840	1.38375e-06	184305	TRUE	7.47267e-06	0.00298042	23.4304	29.788	21.9083
rs72799346	T	G	T	G	-0.243234	-0.002366	0.0217669	0.025441	FALSE	FALSE	FALSE	ieu-a-7	2	22637442	0.0299878	184305	0.937113	Coronary heart disease || id:ieu-a-7	Coronary heart disease	Coronary heart disease || ||	TRUE	igd	2	22414570	0.0539023	6.40691e-06	GCST90199654	Paraxanthine levels in elite athletes	7840	2	TRUE			0.00259121	7840	3.3776e-08	184305	TRUE	1.07563e-05	0.00251952	19.7979	29.788	20.3626
rs7326993	G	A	G	A	-0.0721645	0.000861	0.532382	0.532497	FALSE	FALSE	FALSE	ieu-a-7	13	92849448	0.009418	184305	0.927159	Coronary heart disease || id:ieu-a-7	Coronary heart disease	Coronary heart disease || ||	TRUE	igd	13	92197195	0.0163342	9.96179e-06	GCST90199654	Paraxanthine levels in elite athletes	7840	2	TRUE			0.00248408	7840	4.53478e-08	184305	TRUE	1.65912e-05	0.00259294	20.3763	29.788	19.5187
rs75467050	T	C	T	C	-0.181124	-0.019079	0.0391705	0.044055	FALSE	FALSE	FALSE	ieu-a-7	12	98097206	0.0236581	184305	0.419984	Coronary heart disease || id:ieu-a-7	Coronary heart disease	Coronary heart disease || ||	TRUE	igd	12	97703428	0.0407723	8.89931e-06	GCST90199654	Paraxanthine levels in elite athletes	7840	2	TRUE			0.00251145	7840	3.52872e-06	184305	TRUE	2.84141e-05	0.00246938	19.4029	29.788	19.7343
rs77866717	C	T	C	T	-0.153486	0.000835	0.0564862	0.049106	FALSE	FALSE	FALSE	ieu-a-7	18	40887794	0.0250192	184305	0.973376	Coronary heart disease || id:ieu-a-7	Coronary heart disease	Coronary heart disease || ||	TRUE	igd	18	43307829	0.0346997	9.72234e-06	GCST90199654	Paraxanthine levels in elite athletes	7840	2	TRUE			0.00248999	7840	6.04357e-09	184305	TRUE	1.53711e-05	0.00251107	19.7313	29.788	19.5653
rs7787264	A	T	A	T	-0.112899	-0.006516	0.110708	0.116269	FALSE	TRUE	FALSE	ieu-a-7	7	2707569	0.0154295	184305	0.6728	Coronary heart disease || id:ieu-a-7	Coronary heart disease	Coronary heart disease || ||	TRUE	igd	7	2667935	0.0255469	9.90231e-06	GCST90199654	Paraxanthine levels in elite athletes	7840	2	TRUE			0.00248552	7840	9.67666e-07	184305	TRUE	2.22668e-05	0.00250977	19.7211	29.788	19.5301
rs78574673	G	T	G	T	0.228458	-0.021303	0.0254724	0.021775	FALSE	FALSE	FALSE	ieu-a-7	6	152947906	0.0394884	184305	0.589559	Coronary heart disease || id:ieu-a-7	Coronary heart disease	Coronary heart disease || ||	TRUE	igd	6	152626771	0.0504438	5.92737e-06	GCST90199654	Paraxanthine levels in elite athletes	7840	2	TRUE			0.0026101	7840	1.5791e-06	184305	TRUE	1.52901e-05	0.00259123	20.3629	29.788	20.5115
rs78607630	G	A	G	A	-0.253719	0.026327	0.0241997	0.037861	FALSE	FALSE	FALSE	ieu-a-7	9	110676943	0.0271005	184305	0.33132	Coronary heart disease || id:ieu-a-7	Coronary heart disease	Coronary heart disease || ||	TRUE	igd	9	107914662	0.0518432	9.88221e-07	GCST90199654	Paraxanthine levels in elite athletes	7840	2	TRUE			0.00304644	7840	5.12051e-06	184305	TRUE	4.34449e-06	0.00304023	23.902	29.788	23.9509
rs79361921	A	G	A	G	-0.22819	-0.007453	0.029188	0.026207	FALSE	FALSE	FALSE	ieu-a-7	8	58934563	0.0375396	184305	0.842625	Coronary heart disease || id:ieu-a-7	Coronary heart disease	Coronary heart disease || ||	TRUE	igd	8	58022004	0.0472548	1.37267e-06	GCST90199654	Paraxanthine levels in elite athletes	7840	2	TRUE			0.00296624	7840	2.1387e-07	184305	TRUE	2.77672e-06	0.00295096	23.198	29.788	23.3185
rs9370260	C	T	C	T	0.0811845	-0.014294	0.682724	0.643375	FALSE	FALSE	FALSE	ieu-a-7	6	53921674	0.0096885	184305	0.140117	Coronary heart disease || id:ieu-a-7	Coronary heart disease	Coronary heart disease || ||	TRUE	igd	6	54056876	0.01711	2.08665e-06	GCST90199654	Paraxanthine levels in elite athletes	7840	2	TRUE			0.00286415	7840	1.18102e-05	184305	TRUE	1.38263e-05	0.00285535	22.4443	29.788	22.5137
rs112482875	C	G	C	G	0.183548	-0.02022	0.0370528	0.043676	FALSE	TRUE	FALSE	ieu-a-7	11	20490470	0.0274057	184305	0.460634	Coronary heart disease || id:ieu-a-7	Coronary heart disease	Coronary heart disease || ||	TRUE	igd	11	20468924	0.0390382	2.57958e-06	GCST90199655	4-methyl-2-oxopentanoate levels	8255	2	TRUE			0.00267144	8255	2.95357e-06	184305	TRUE	8.79587e-06	0.0024041	19.8889	29.788	22.1065
rs12894999	A	G	A	G	-0.0850341	-7.1e-05	0.813639	0.764197	FALSE	FALSE	FALSE	ieu-a-7	14	102537609	0.0118002	184305	0.995199	Coronary heart disease || id:ieu-a-7	Coronary heart disease	Coronary heart disease || ||	TRUE	igd	14	102071272	0.019043	7.99266e-06	GCST90199655	4-methyl-2-oxopentanoate levels	8255	2	TRUE			0.00241021	8255	1.96429e-10	184305	TRUE	1.26905e-05	0.00219282	18.1371	29.788	19.9396
rs2291115	T	C	T	C	-0.0877537	0.000185	0.188329	0.242108	FALSE	FALSE	FALSE	ieu-a-7	1	84021429	0.0108986	184305	0.986457	Coronary heart disease || id:ieu-a-7	Coronary heart disease	Coronary heart disease || ||	TRUE	igd	1	83555746	0.0192477	5.13532e-06	GCST90199655	4-methyl-2-oxopentanoate levels	8255	2	TRUE			0.00251228	8255	1.5634e-09	184305	TRUE	8.39865e-06	0.00235428	19.4757	29.788	20.7861
rs56107485	C	A	C	A	-0.152913	0.024733	0.0606982	0.053877	FALSE	FALSE	FALSE	ieu-a-7	6	156838561	0.0219537	184305	0.259912	Coronary heart disease || id:ieu-a-7	Coronary heart disease	Coronary heart disease || ||	TRUE	igd	6	156517427	0.0307105	6.38534e-07	GCST90199655	4-methyl-2-oxopentanoate levels	8255	2	TRUE			0.00299503	8255	6.88657e-06	184305	TRUE	3.56313e-06	0.00266624	22.0633	29.788	24.7922
rs58729469	T	C	T	C	0.0976357	0.000908	0.159237	0.146336	FALSE	FALSE	FALSE	ieu-a-7	11	36071833	0.0136828	184305	0.947091	Coronary heart disease || id:ieu-a-7	Coronary heart disease	Coronary heart disease || ||	TRUE	igd	11	36050283	0.0200177	1.07452e-06	GCST90199655	4-methyl-2-oxopentanoate levels	8255	2	TRUE			0.00287427	8255	2.3894e-08	184305	TRUE	1.97961e-06	0.00255249	21.1196	29.788	23.7897
rs6055350	C	G	C	G	-0.186005	-0.001298	0.96283	0.951988	FALSE	TRUE	FALSE	ieu-a-7	20	839515	0.0271189	184305	0.961825	Coronary heart disease || id:ieu-a-7	Coronary heart disease	Coronary heart disease || ||	TRUE	igd	20	858872	0.0393211	2.24051e-06	GCST90199655	4-methyl-2-oxopentanoate levels	8255	2	TRUE			0.00270402	8255	1.243e-08	184305	TRUE	3.91843e-06	0.0024764	20.4885	29.788	22.3768
rs6754181	C	T	C	T	0.0935486	-0.009468	0.840504	0.812257	FALSE	FALSE	FALSE	ieu-a-7	2	29966380	0.0124683	184305	0.447634	Coronary heart disease || id:ieu-a-7	Coronary heart disease	Coronary heart disease || ||	TRUE	igd	2	29743514	0.0202835	3.98709e-06	GCST90199655	4-methyl-2-oxopentanoate levels	8255	2	TRUE			0.00257075	8255	3.12873e-06	184305	TRUE	1.34449e-05	0.00234636	19.41	29.788	21.271
rs7012455	T	C	T	C	0.0767546	0.02927	0.72081	0.65939	FALSE	FALSE	FALSE	ieu-a-7	8	52688351	0.010098	184305	0.00374852	Coronary heart disease || id:ieu-a-7	Coronary heart disease	Coronary heart disease || ||	TRUE	igd	8	51775791	0.0165318	3.43625e-06	GCST90199655	4-methyl-2-oxopentanoate levels	8255	2	TRUE			0.0026051	8255	4.55851e-05	184305	TRUE	8.1491e-05	0.00237115	19.6156	29.788	21.556
rs73597221	A	G	A	G	-0.17389	-0.023938	0.0466309	0.065414	FALSE	FALSE	FALSE	ieu-a-7	11	132108194	0.0194574	184305	0.218593	Coronary heart disease || id:ieu-a-7	Coronary heart disease	Coronary heart disease || ||	TRUE	igd	11	132238300	0.0348777	6.17385e-07	GCST90199655	4-methyl-2-oxopentanoate levels	8255	2	TRUE			0.00300286	8255	8.2124e-06	184305	TRUE	3.83225e-06	0.00268853	22.2482	29.788	24.8573
rs75090459	A	G	A	G	0.26568	0.003988	0.017058	0.017591	FALSE	FALSE	FALSE	ieu-a-7	13	22701989	0.0411591	184305	0.922812	Coronary heart disease || id:ieu-a-7	Coronary heart disease	Coronary heart disease || ||	TRUE	igd	13	22127850	0.0567147	2.80646e-06	GCST90199655	4-methyl-2-oxopentanoate levels	8255	2	TRUE			0.00265193	8255	5.09385e-08	184305	TRUE	5.09936e-06	0.00236703	19.5814	29.788	21.9445
rs77753167	T	C	T	C	-0.147065	-0.003465	0.0607551	0.067218	FALSE	FALSE	FALSE	ieu-a-7	18	10814500	0.0194053	184305	0.858283	Coronary heart disease || id:ieu-a-7	Coronary heart disease	Coronary heart disease || ||	TRUE	igd	18	10814502	0.0310573	2.18759e-06	GCST90199655	4-methyl-2-oxopentanoate levels	8255	2	TRUE			0.00270957	8255	1.72995e-07	184305	TRUE	4.36162e-06	0.00246837	20.4219	29.788	22.4229
rs893971	G	A	G	A	0.0924746	0.008572	0.399187	0.359842	FALSE	FALSE	FALSE	ieu-a-7	4	89203670	0.009946	184305	0.388766	Coronary heart disease || id:ieu-a-7	Coronary heart disease	Coronary heart disease || ||	TRUE	igd	4	88282518	0.0150638	8.31252e-10	GCST90199655	4-methyl-2-oxopentanoate levels	8255	2	TRUE			0.00454554	8255	4.03026e-06	184305	TRUE	5.79604e-09	0.00410195	33.9929	29.788	37.6856
rs11078452	C	A	C	A	-0.266191	0.028215	0.980903	0.923283	FALSE	FALSE	FALSE	ieu-a-7	17	3406741	0.0211183	184305	0.181535	Coronary heart disease || id:ieu-a-7	Coronary heart disease	Coronary heart disease || ||	TRUE	igd	17	3503447	0.0555632	1.66138e-06	GCST90199656	3-indoxyl sulfate levels	8242	2	TRUE			0.00277765	8242	9.68513e-06	184305	TRUE	1.04172e-05	0.00265465	21.9326	29.788	22.9516
rs114842896	A	G	A	G	0.30447	0.033818	0.013081	0.011299	FALSE	FALSE	FALSE	ieu-a-7	5	99229397	0.0571382	184305	0.553943	Coronary heart disease || id:ieu-a-7	Coronary heart disease	Coronary heart disease || ||	TRUE	igd	5	99893693	0.0669031	5.34158e-06	GCST90199656	3-indoxyl sulfate levels	8242	2	TRUE			0.00250714	8242	1.90068e-06	184305	TRUE	1.5053e-05	0.00239354	19.7701	29.788	20.7108
rs117023050	C	T	C	T	0.16474	-0.004861	0.0449466	0.050345	FALSE	FALSE	FALSE	ieu-a-7	12	132490297	0.0256937	184305	0.849944	Coronary heart disease || id:ieu-a-7	Coronary heart disease	Coronary heart disease || ||	TRUE	igd	12	132005752	0.0370405	8.68438e-06	GCST90199656	3-indoxyl sulfate levels	8242	2	TRUE			0.00239484	8242	1.94207e-07	184305	TRUE	1.63087e-05	0.00232998	19.2439	29.788	19.7808
rs140560919	C	T	C	T	0.292597	0.040451	0.0138957	0.018669	FALSE	FALSE	FALSE	ieu-a-7	1	147036300	0.0405627	184305	0.318645	Coronary heart disease || id:ieu-a-7	Coronary heart disease	Coronary heart disease || ||	TRUE	igd	1	147564521	0.0654917	7.90694e-06	GCST90199656	3-indoxyl sulfate levels	8242	2	TRUE			0.00241651	8242	5.39598e-06	184305	TRUE	3.14444e-05	0.00234624	19.3785	29.788	19.9603
rs146369127	A	G	A	G	0.269587	0.050181	0.0185524	0.017493	FALSE	FALSE	FALSE	ieu-a-7	3	22425473	0.0602841	184305	0.405178	Coronary heart disease || id:ieu-a-7	Coronary heart disease	Coronary heart disease || ||	TRUE	igd	3	22383982	0.0567278	2.0112e-06	GCST90199656	3-indoxyl sulfate levels	8242	2	TRUE			0.00273332	8242	3.75958e-06	184305	TRUE	7.64444e-06	0.00264664	21.8662	29.788	22.5843
rs191105317	G	C	G	C	-0.362577	0.024928	0.0117339	0.009321	FALSE	TRUE	FALSE	ieu-a-7	4	129736514	0.0604459	184305	0.680046	Coronary heart disease || id:ieu-a-7	Coronary heart disease	Coronary heart disease || ||	TRUE	igd	4	128815359	0.0700538	2.27061e-07	GCST90199656	3-indoxyl sulfate levels	8242	2	TRUE			0.00324041	8242	9.22802e-07	184305	TRUE	6.51161e-07	0.00304893	25.2	29.788	26.7878
rs1971157	C	G	C	G	0.0712004	0.027815	0.381295	0.384425	FALSE	TRUE	FALSE	ieu-a-7	17	27925343	0.0100883	184305	0.00583056	Coronary heart disease || id:ieu-a-7	Coronary heart disease	Coronary heart disease || ||	TRUE	igd	17	29598325	0.0160318	8.94547e-06	GCST90199656	3-indoxyl sulfate levels	8242	2	TRUE			0.002388	8242	4.1245e-05	184305	TRUE	0.000161423	0.00239188	19.7564	29.788	19.7242
rs198542	A	G	A	G	0.0702721	0.010297	0.454857	0.475737	FALSE	FALSE	FALSE	ieu-a-7	17	48644537	0.0098471	184305	0.295705	Coronary heart disease || id:ieu-a-7	Coronary heart disease	Coronary heart disease || ||	TRUE	igd	17	50567176	0.0153512	4.70302e-06	GCST90199656	3-indoxyl sulfate levels	8242	2	TRUE			0.00253659	8242	5.93294e-06	184305	TRUE	2.04299e-05	0.00244896	20.2289	29.788	20.9547
rs2016346	C	T	C	T	-0.0742048	0.00535	0.307059	0.293125	FALSE	FALSE	FALSE	ieu-a-7	8	136437975	0.0103479	184305	0.605147	Coronary heart disease || id:ieu-a-7	Coronary heart disease	Coronary heart disease || ||	TRUE	igd	8	135425732	0.01661	7.9147e-06	GCST90199656	3-indoxyl sulfate levels	8242	2	TRUE			0.00241628	8242	1.45034e-06	184305	TRUE	2.02721e-05	0.00234321	19.3534	29.788	19.9584
rs2496679	C	T	C	T	0.213632	-0.01497	0.974437	0.91953	FALSE	FALSE	FALSE	ieu-a-7	6	81319092	0.0219178	184305	0.494603	Coronary heart disease || id:ieu-a-7	Coronary heart disease	Coronary heart disease || ||	TRUE	igd	6	80609375	0.0481132	8.98791e-06	GCST90199656	3-indoxyl sulfate levels	8242	2	TRUE			0.00238693	8242	2.53114e-06	184305	TRUE	2.65883e-05	0.00227367	18.7778	29.788	19.7153
rs4649261	G	A	G	A	0.0737226	-0.003159	0.388522	0.418941	FALSE	FALSE	FALSE	ieu-a-7	1	233944248	0.0094115	184305	0.737133	Coronary heart disease || id:ieu-a-7	Coronary heart disease	Coronary heart disease || ||	TRUE	igd	1	233808502	0.0158935	3.50859e-06	GCST90199656	3-indoxyl sulfate levels	8242	2	TRUE			0.00260437	8242	6.11292e-07	184305	TRUE	7.94991e-06	0.00258243	21.3343	29.788	21.516
rs4692540	T	G	T	G	-0.0952962	-0.000473	0.837001	0.804948	FALSE	FALSE	FALSE	ieu-a-7	4	26530798	0.0129213	184305	0.970799	Coronary heart disease || id:ieu-a-7	Coronary heart disease	Coronary heart disease || ||	TRUE	igd	4	26529176	0.0204074	3.01657e-06	GCST90199656	3-indoxyl sulfate levels	8242	2	TRUE			0.00263937	8242	7.27072e-09	184305	TRUE	5.14409e-06	0.00247795	20.469	29.788	21.806
rs492467	G	A	G	A	-0.0701385	0.005169	0.400124	0.380468	FALSE	FALSE	FALSE	ieu-a-7	1	165881479	0.0095625	184305	0.588819	Coronary heart disease || id:ieu-a-7	Coronary heart disease	Coronary heart disease || ||	TRUE	igd	1	165912242	0.0156135	7.05018e-06	GCST90199656	3-indoxyl sulfate levels	8242	2	TRUE			0.002443	8242	1.58539e-06	184305	TRUE	1.85945e-05	0.00236156	19.5053	29.788	20.1796
rs55839541	A	G	A	G	0.101358	-0.012309	0.139213	0.122111	FALSE	FALSE	FALSE	ieu-a-7	1	214043710	0.0153263	184305	0.421899	Coronary heart disease || id:ieu-a-7	Coronary heart disease	Coronary heart disease || ||	TRUE	igd	1	213870367	0.0221088	4.55069e-06	GCST90199656	3-indoxyl sulfate levels	8242	2	TRUE			0.00254421	8242	3.49975e-06	184305	TRUE	1.58137e-05	0.00246219	20.3385	29.788	21.0177
rs56113850	C	T	C	T	-0.076687	-0.005893	0.576131	0.521187	FALSE	FALSE	FALSE	ieu-a-7	19	41353107	0.0113668	184305	0.604152	Coronary heart disease || id:ieu-a-7	Coronary heart disease	Coronary heart disease || ||	TRUE	igd	19	40847202	0.0152603	5.02725e-07	GCST90199656	3-indoxyl sulfate levels	8242	2	TRUE			0.00305535	8242	1.45836e-06	184305	TRUE	1.53581e-06	0.00287228	23.7357	29.788	25.2533
rs651578	C	T	C	T	0.0800674	0.013211	0.240034	0.227118	FALSE	FALSE	FALSE	ieu-a-7	6	25873883	0.0110507	184305	0.231896	Coronary heart disease || id:ieu-a-7	Coronary heart disease	Coronary heart disease || ||	TRUE	igd	6	25873655	0.01791	7.80184e-06	GCST90199656	3-indoxyl sulfate levels	8242	2	TRUE			0.00241959	8242	7.75454e-06	184305	TRUE	3.71513e-05	0.00233888	19.3176	29.788	19.9857
rs72987107	T	C	T	C	-0.255879	-0.09409	0.0209548	0.016424	FALSE	FALSE	FALSE	ieu-a-7	19	5335254	0.0545757	184305	0.0847032	Coronary heart disease || id:ieu-a-7	Coronary heart disease	Coronary heart disease || ||	TRUE	igd	19	5335243	0.0532644	1.55571e-06	GCST90199656	3-indoxyl sulfate levels	8242	2	TRUE			0.00279289	8242	1.61268e-05	184305	TRUE	1.41882e-05	0.00268649	22.1963	29.788	23.0778
rs74334677	A	G	A	G	-0.217425	-0.042077	0.0306073	0.018191	FALSE	FALSE	FALSE	ieu-a-7	10	61328330	0.0556305	184305	0.44943	Coronary heart disease || id:ieu-a-7	Coronary heart disease	Coronary heart disease || ||	TRUE	igd	10	59568572	0.0447759	1.19873e-06	GCST90199656	3-indoxyl sulfate levels	8242	2	TRUE			0.0028534	8242	3.10406e-06	184305	TRUE	4.39423e-06	0.00280526	23.1804	29.788	23.5793
rs7651697	C	T	C	T	0.0706641	0.008055	0.496355	0.498848	FALSE	FALSE	FALSE	ieu-a-7	3	72234685	0.0093148	184305	0.387177	Coronary heart disease || id:ieu-a-7	Coronary heart disease	Coronary heart disease || ||	TRUE	igd	3	72185534	0.0155505	5.51533e-06	GCST90199656	3-indoxyl sulfate levels	8242	2	TRUE			0.00249974	8242	4.05742e-06	184305	TRUE	2.00014e-05	0.00249657	20.6233	29.788	20.6495
rs9479849	A	G	A	G	-0.39936	0.056345	0.00753433	0.011626	FALSE	FALSE	FALSE	ieu-a-7	6	154752265	0.0474769	184305	0.235311	Coronary heart disease || id:ieu-a-7	Coronary heart disease	Coronary heart disease || ||	TRUE	igd	6	154431131	0.0884327	6.30262e-06	GCST90199656	3-indoxyl sulfate levels	8242	2	TRUE			0.00246889	8242	7.64206e-06	184305	TRUE	3.03648e-05	0.00238517	19.7008	29.788	20.394
rs1000821	T	C	T	C	0.0955501	0.016509	0.460226	0.406408	FALSE	FALSE	FALSE	ieu-a-7	17	74434003	0.0098927	184305	0.0951568	Coronary heart disease || id:ieu-a-7	Coronary heart disease	Coronary heart disease || ||	TRUE	igd	17	76437921	0.0152708	3.92298e-10	GCST90199657	Sphingosine 1-phosphate levels	8246	2	TRUE			0.00472654	8246	1.51103e-05	184305	TRUE	7.87306e-09	0.00453602	37.5654	29.788	39.1506
rs10502344	G	A	G	A	0.190151	0.004076	0.0362631	0.040879	FALSE	FALSE	FALSE	ieu-a-7	18	6107709	0.0238786	184305	0.864462	Coronary heart disease || id:ieu-a-7	Coronary heart disease	Coronary heart disease || ||	TRUE	igd	18	6107710	0.0413987	4.36607e-06	GCST90199657	Sphingosine 1-phosphate levels	8246	2	TRUE			0.00255256	8246	1.58095e-07	184305	TRUE	8.34002e-06	0.00252726	20.8876	29.788	21.0972
rs10744901	C	T	C	T	-0.0733906	-0.005468	0.317054	0.361721	FALSE	FALSE	FALSE	ieu-a-7	12	118145683	0.0097982	184305	0.576804	Coronary heart disease || id:ieu-a-7	Coronary heart disease	Coronary heart disease || ||	TRUE	igd	12	117707878	0.0164198	7.83555e-06	GCST90199657	Sphingosine 1-phosphate levels	8246	2	TRUE			0.00241744	8246	1.68978e-06	184305	TRUE	2.08654e-05	0.00233255	19.2745	29.788	19.9777
rs10960927	C	T	C	T	0.157515	-0.011227	0.0494112	0.056524	FALSE	FALSE	FALSE	ieu-a-7	9	13072341	0.0234278	184305	0.631783	Coronary heart disease || id:ieu-a-7	Coronary heart disease	Coronary heart disease || ||	TRUE	igd	9	13072342	0.0353441	8.32674e-06	GCST90199657	Sphingosine 1-phosphate levels	8246	2	TRUE			0.0024034	8246	1.24604e-06	184305	TRUE	2.05336e-05	0.00233073	19.2594	29.788	19.8614
rs115939317	T	C	T	C	0.27762	-0.051983	0.0153631	0.017837	FALSE	FALSE	FALSE	ieu-a-7	4	114651674	0.0475127	184305	0.273917	Coronary heart disease || id:ieu-a-7	Coronary heart disease	Coronary heart disease || ||	TRUE	igd	4	113730518	0.0620996	7.80146e-06	GCST90199657	Sphingosine 1-phosphate levels	8246	2	TRUE			0.00241843	8246	6.49483e-06	184305	TRUE	3.39199e-05	0.00233177	19.2681	29.788	19.9859
rs11986857	G	C	G	C	0.147791	-0.002975	0.0606116	0.067596	FALSE	TRUE	FALSE	ieu-a-7	8	21040058	0.0201754	184305	0.882772	Coronary heart disease || id:ieu-a-7	Coronary heart disease	Coronary heart disease || ||	TRUE	igd	8	21182547	0.0320867	4.10483e-06	GCST90199657	Sphingosine 1-phosphate levels	8246	2	TRUE			0.0025668	8246	1.17977e-07	184305	TRUE	7.6912e-06	0.00248729	20.5564	29.788	21.2151
rs138132596	G	A	G	A	0.513535	0.03561	0.00497814	0.029886	FALSE	FALSE	FALSE	ieu-a-7	5	129644806	0.0274079	184305	0.193854	Coronary heart disease || id:ieu-a-7	Coronary heart disease	Coronary heart disease || ||	TRUE	igd	5	130309113	0.109227	2.58227e-06	GCST90199657	Sphingosine 1-phosphate levels	8246	2	TRUE			0.00267411	8246	9.15917e-06	184305	TRUE	1.50031e-05	0.00261258	21.5945	29.788	22.1045
rs140079282	A	C	A	C	-0.261606	-0.009998	0.0184262	0.022514	FALSE	FALSE	FALSE	ieu-a-7	3	99166438	0.0357777	184305	0.7799	Coronary heart disease || id:ieu-a-7	Coronary heart disease	Coronary heart disease || ||	TRUE	igd	3	99447594	0.056463	3.60008e-06	GCST90199657	Sphingosine 1-phosphate levels	8246	2	TRUE			0.00259717	8246	4.2371e-07	184305	TRUE	7.71628e-06	0.00247562	20.4597	29.788	21.4668
rs141116536	C	T	C	T	0.229382	-0.058747	0.0266543	0.021709	FALSE	FALSE	FALSE	ieu-a-7	6	1333169	0.0422019	184305	0.163908	Coronary heart disease || id:ieu-a-7	Coronary heart disease	Coronary heart disease || ||	TRUE	igd	6	1332934	0.0484838	2.233e-06	GCST90199657	Sphingosine 1-phosphate levels	8246	2	TRUE			0.00270776	8246	1.05141e-05	184305	TRUE	1.43569e-05	0.00273013	22.5688	29.788	22.3834
rs1456759	T	C	T	C	-0.0816351	0.016502	0.737365	0.727067	FALSE	FALSE	FALSE	ieu-a-7	4	31549421	0.0105803	184305	0.118835	Coronary heart disease || id:ieu-a-7	Coronary heart disease	Coronary heart disease || ||	TRUE	igd	4	31547799	0.0173502	2.53695e-06	GCST90199657	Sphingosine 1-phosphate levels	8246	2	TRUE			0.0026782	8246	1.31989e-05	184305	TRUE	1.88348e-05	0.00258118	21.3343	29.788	22.1383
rs1488103	A	G	A	G	-0.0723142	0.021678	0.393833	0.388409	FALSE	FALSE	FALSE	ieu-a-7	3	168925594	0.0095451	184305	0.0231404	Coronary heart disease || id:ieu-a-7	Coronary heart disease	Coronary heart disease || ||	TRUE	igd	3	169207806	0.015939	5.70756e-06	GCST90199657	Sphingosine 1-phosphate levels	8246	2	TRUE			0.0024906	8246	2.79855e-05	184305	TRUE	7.28636e-05	0.00249679	20.635	29.788	20.5838
rs41397245	A	G	A	G	-0.0776802	-0.014391	0.378124	0.338297	FALSE	FALSE	FALSE	ieu-a-7	5	77170663	0.0101621	184305	0.156735	Coronary heart disease || id:ieu-a-7	Coronary heart disease	Coronary heart disease || ||	TRUE	igd	5	77874839	0.0161082	1.41834e-06	GCST90199657	Sphingosine 1-phosphate levels	8246	2	TRUE			0.00281297	8246	1.08812e-05	184305	TRUE	9.75494e-06	0.00283785	23.4618	29.788	23.2556
rs6493965	G	A	G	A	-0.0718094	-0.02002	0.644609	0.667412	FALSE	FALSE	FALSE	ieu-a-7	15	58186161	0.0105988	184305	0.0589061	Coronary heart disease || id:ieu-a-7	Coronary heart disease	Coronary heart disease || ||	TRUE	igd	15	57893963	0.0160027	7.21237e-06	GCST90199657	Sphingosine 1-phosphate levels	8246	2	TRUE			0.00243657	8246	1.93586e-05	184305	TRUE	6.40553e-05	0.00236263	19.5236	29.788	20.1361
rs71588370	G	A	G	A	0.184415	-0.003801	0.0394801	0.033116	FALSE	FALSE	FALSE	ieu-a-7	5	104157179	0.0294284	184305	0.89723	Coronary heart disease || id:ieu-a-7	Coronary heart disease	Coronary heart disease || ||	TRUE	igd	5	104821478	0.0392364	2.60043e-06	GCST90199657	Sphingosine 1-phosphate levels	8246	2	TRUE			0.00267248	8246	9.0517e-08	184305	TRUE	4.89268e-06	0.00257933	21.319	29.788	22.0909
rs7200047	A	G	A	G	0.0725737	0.005008	0.49245	0.508915	FALSE	FALSE	FALSE	ieu-a-7	16	83151469	0.0102208	184305	0.624147	Coronary heart disease || id:ieu-a-7	Coronary heart disease	Coronary heart disease || ||	TRUE	igd	16	83117864	0.0157374	3.99671e-06	GCST90199657	Sphingosine 1-phosphate levels	8246	2	TRUE			0.00257298	8246	1.30264e-06	184305	TRUE	1.04253e-05	0.00263287	21.7627	29.788	21.2663
rs9360664	A	G	A	G	-0.0936889	0.005959	0.1805	0.181293	FALSE	FALSE	FALSE	ieu-a-7	6	74041424	0.0122185	184305	0.625759	Coronary heart disease || id:ieu-a-7	Coronary heart disease	Coronary heart disease || ||	TRUE	igd	6	73331701	0.0200697	3.03896e-06	GCST90199657	Sphingosine 1-phosphate levels	8246	2	TRUE			0.00263639	8246	1.29056e-06	184305	TRUE	8.04573e-06	0.00259676	21.4635	29.788	21.7919
rs10414919	A	G	A	G	-0.0797399	0.005842	0.280961	0.321641	FALSE	FALSE	FALSE	ieu-a-7	19	20055286	0.0101328	184305	0.564248	Coronary heart disease || id:ieu-a-7	Coronary heart disease	Coronary heart disease || ||	TRUE	igd	19	19944477	0.0161833	8.33707e-07	GCST90199658	Alpha-hydroxyisocaproate levels	8250	2	TRUE			0.00293489	8250	1.80356e-06	184305	TRUE	2.61889e-06	0.00256909	21.2445	29.788	24.2782
rs10832920	G	A	G	A	-0.0659084	0.000438	0.539011	0.497907	FALSE	FALSE	FALSE	ieu-a-7	11	18341869	0.0092877	184305	0.962386	Coronary heart disease || id:ieu-a-7	Coronary heart disease	Coronary heart disease || ||	TRUE	igd	11	18320322	0.0142595	3.79896e-06	GCST90199658	Alpha-hydroxyisocaproate levels	8250	2	TRUE			0.00258345	8250	1.2067e-08	184305	TRUE	6.48217e-06	0.00215874	17.8438	29.788	21.3635
rs113914810	T	C	T	C	0.195815	0.049961	0.0292252	0.020391	FALSE	FALSE	FALSE	ieu-a-7	12	72649156	0.0425289	184305	0.240093	Coronary heart disease || id:ieu-a-7	Coronary heart disease	Coronary heart disease || ||	TRUE	igd	12	72255376	0.0434709	6.65286e-06	GCST90199658	Alpha-hydroxyisocaproate levels	8250	2	TRUE			0.00245402	8250	7.48787e-06	184305	TRUE	3.15758e-05	0.00217569	17.9843	29.788	20.2906
rs11715398	T	C	T	C	0.116068	-0.007384	0.105338	0.116857	FALSE	FALSE	FALSE	ieu-a-7	3	193834116	0.0163018	184305	0.65058	Coronary heart disease || id:ieu-a-7	Coronary heart disease	Coronary heart disease || ||	TRUE	igd	3	194116327	0.0236777	9.48658e-07	GCST90199658	Alpha-hydroxyisocaproate levels	8250	2	TRUE			0.00290492	8250	1.11322e-06	184305	TRUE	2.60784e-06	0.00253921	20.9967	29.788	24.0296
rs142728688	A	G	A	G	-0.23423	-0.073298	0.0227938	0.018552	FALSE	FALSE	FALSE	ieu-a-7	1	154628059	0.0468338	184305	0.117567	Coronary heart disease || id:ieu-a-7	Coronary heart disease	Coronary heart disease || ||	TRUE	igd	1	154655583	0.0483974	1.30022e-06	GCST90199658	Alpha-hydroxyisocaproate levels	8250	2	TRUE			0.00283179	8250	1.32901e-05	184305	TRUE	1.04079e-05	0.00244409	20.2083	29.788	23.4229
rs142808012	T	A	T	A	0.267776	0.050836	0.0149562	0.022835	FALSE	TRUE	FALSE	ieu-a-7	1	240368526	0.031627	184305	0.107975	Coronary heart disease || id:ieu-a-7	Coronary heart disease	Coronary heart disease || ||	TRUE	igd	1	240205226	0.059366	6.46449e-06	GCST90199658	Alpha-hydroxyisocaproate levels	8250	2	TRUE			0.00246065	8250	1.40181e-05	184305	TRUE	4.53834e-05	0.00211276	17.4629	29.788	20.3455
rs1808859	C	T	C	T	0.0726542	0.003785	0.44434	0.413475	FALSE	FALSE	FALSE	ieu-a-7	4	89234812	0.0096918	184305	0.696139	Coronary heart disease || id:ieu-a-7	Coronary heart disease	Coronary heart disease || ||	TRUE	igd	4	88313660	0.0146613	7.21386e-07	GCST90199658	Alpha-hydroxyisocaproate levels	8250	2	TRUE			0.0029685	8250	8.27542e-07	184305	TRUE	1.89131e-06	0.00260661	21.5555	29.788	24.5571
rs1955284	T	C	T	C	0.0830487	-0.011875	0.807407	0.742653	FALSE	FALSE	FALSE	ieu-a-7	2	8697057	0.0111409	184305	0.286471	Coronary heart disease || id:ieu-a-7	Coronary heart disease	Coronary heart disease || ||	TRUE	igd	2	8556927	0.0184612	6.84165e-06	GCST90199658	Alpha-hydroxyisocaproate levels	8250	2	TRUE			0.00244756	8250	6.16441e-06	184305	TRUE	2.93431e-05	0.00214501	17.73	29.788	20.237
rs1975533	G	A	G	A	-0.119704	-0.000847	0.116319	0.117036	FALSE	FALSE	FALSE	ieu-a-7	5	58702408	0.0144051	184305	0.953113	Coronary heart disease || id:ieu-a-7	Coronary heart disease	Coronary heart disease || ||	TRUE	igd	5	59406582	0.0225894	1.16365e-07	GCST90199658	Alpha-hydroxyisocaproate levels	8250	2	TRUE			0.00339299	8250	1.87587e-08	184305	TRUE	2.35377e-07	0.00294573	24.3682	29.788	28.0807
rs34973031	C	A	C	A	-0.123459	0.009704	0.0853852	0.115137	FALSE	FALSE	FALSE	ieu-a-7	5	73166354	0.0148386	184305	0.51313	Coronary heart disease || id:ieu-a-7	Coronary heart disease	Coronary heart disease || ||	TRUE	igd	5	73870529	0.0259273	1.91937e-06	GCST90199658	Alpha-hydroxyisocaproate levels	8250	2	TRUE			0.00274151	8250	2.3205e-06	184305	TRUE	6.15799e-06	0.00238065	19.6825	29.788	22.6741
rs35783478	A	G	A	G	0.0830143	0.002165	0.231208	0.26714	FALSE	FALSE	FALSE	ieu-a-7	4	109229383	0.011067	184305	0.844902	Coronary heart disease || id:ieu-a-7	Coronary heart disease	Coronary heart disease || ||	TRUE	igd	4	108308227	0.0171179	1.23742e-06	GCST90199658	Alpha-hydroxyisocaproate levels	8250	2	TRUE			0.00284328	8250	2.07646e-07	184305	TRUE	2.58201e-06	0.0024499	20.2564	29.788	23.5182
rs4852728	A	C	A	C	-0.0864222	0.001531	0.178937	0.219007	FALSE	FALSE	FALSE	ieu-a-7	2	71130038	0.0115037	184305	0.894124	Coronary heart disease || id:ieu-a-7	Coronary heart disease	Coronary heart disease || ||	TRUE	igd	2	70902908	0.0188155	4.36647e-06	GCST90199658	Alpha-hydroxyisocaproate levels	8250	2	TRUE			0.0025513	8250	9.61043e-08	184305	TRUE	8.04549e-06	0.00219461	18.141	29.788	21.0969
rs4934976	A	G	A	G	-0.0731137	-0.005488	0.657788	0.630077	FALSE	FALSE	FALSE	ieu-a-7	10	33791122	0.0096396	184305	0.569141	Coronary heart disease || id:ieu-a-7	Coronary heart disease	Coronary heart disease || ||	TRUE	igd	10	33502194	0.0155296	2.50131e-06	GCST90199658	Alpha-hydroxyisocaproate levels	8250	2	TRUE			0.00268017	8250	1.75864e-06	184305	TRUE	7.25959e-06	0.00240663	19.8977	29.788	22.1655
rs620617	T	C	T	C	-0.070098	0.011705	0.599716	0.589713	FALSE	FALSE	FALSE	ieu-a-7	5	19446847	0.0094637	184305	0.216147	Coronary heart disease || id:ieu-a-7	Coronary heart disease	Coronary heart disease || ||	TRUE	igd	5	19446738	0.0147602	2.0429e-06	GCST90199658	Alpha-hydroxyisocaproate levels	8250	2	TRUE			0.00272704	8250	8.30013e-06	184305	TRUE	1.14429e-05	0.00235915	19.5043	29.788	22.5542
rs62485457	C	T	C	T	0.228417	-0.020028	0.0221196	0.022042	FALSE	FALSE	FALSE	ieu-a-7	7	104557522	0.0396035	184305	0.613059	Coronary heart disease || id:ieu-a-7	Coronary heart disease	Coronary heart disease || ||	TRUE	igd	7	104917075	0.0492927	3.58845e-06	GCST90199658	Alpha-hydroxyisocaproate levels	8250	2	TRUE			0.00259665	8250	1.38763e-06	184305	TRUE	9.56992e-06	0.0022571	18.6586	29.788	21.4729
rs72859389	C	A	C	A	0.132036	0.002501	0.0611044	0.064193	FALSE	FALSE	FALSE	ieu-a-7	1	8252684	0.0195161	184305	0.89803	Coronary heart disease || id:ieu-a-7	Coronary heart disease	Coronary heart disease || ||	TRUE	igd	1	8192624	0.029663	8.53929e-06	GCST90199658	Alpha-hydroxyisocaproate levels	8250	2	TRUE			0.00239643	8250	8.91064e-08	184305	TRUE	1.5163e-05	0.00200034	16.5319	29.788	19.8132
rs734860	C	T	C	T	0.0779035	0.003479	0.602667	0.588596	FALSE	FALSE	FALSE	ieu-a-7	5	173399841	0.0098927	184305	0.725083	Coronary heart disease || id:ieu-a-7	Coronary heart disease	Coronary heart disease || ||	TRUE	igd	5	173972838	0.0152545	3.27446e-07	GCST90199658	Alpha-hydroxyisocaproate levels	8250	2	TRUE			0.00315209	8250	6.71037e-07	184305	TRUE	8.62602e-07	0.00290654	24.043	29.788	26.0806
rs76445723	T	G	T	G	-0.227203	0.00045	0.0211627	0.033215	FALSE	FALSE	FALSE	ieu-a-7	8	18953852	0.0262684	184305	0.986332	Coronary heart disease || id:ieu-a-7	Coronary heart disease	Coronary heart disease || ||	TRUE	igd	8	19096342	0.0503536	6.41715e-06	GCST90199658	Alpha-hydroxyisocaproate levels	8250	2	TRUE			0.00246234	8250	1.5923e-09	184305	TRUE	1.03927e-05	0.00213865	17.6774	29.788	20.3595
rs7737487	A	G	A	G	0.0727989	0.005095	0.595653	0.603463	FALSE	FALSE	FALSE	ieu-a-7	5	164483002	0.0097298	184305	0.600522	Coronary heart disease || id:ieu-a-7	Coronary heart disease	Coronary heart disease || ||	TRUE	igd	5	165055996	0.0146176	6.35102e-07	GCST90199658	Alpha-hydroxyisocaproate levels	8250	2	TRUE			0.00299809	8250	1.48781e-06	184305	TRUE	1.92353e-06	0.00255286	21.1099	29.788	24.8026
rs78820411	G	A	G	A	0.170371	-0.036627	0.0386388	0.02649	FALSE	FALSE	FALSE	ieu-a-7	15	26478903	0.0389463	184305	0.346988	Coronary heart disease || id:ieu-a-7	Coronary heart disease	Coronary heart disease || ||	TRUE	igd	15	26233756	0.0373253	5.0068e-06	GCST90199658	Alpha-hydroxyisocaproate levels	8250	2	TRUE			0.00251965	8250	4.79883e-06	184305	TRUE	1.96446e-05	0.00215641	17.8245	29.788	20.8346
rs79376596	G	A	G	A	0.195553	0.056403	0.0291836	0.013353	FALSE	FALSE	FALSE	ieu-a-7	20	2399550	0.0657285	184305	0.390826	Coronary heart disease || id:ieu-a-7	Coronary heart disease	Coronary heart disease || ||	TRUE	igd	20	2418904	0.0432889	6.26065e-06	GCST90199658	Alpha-hydroxyisocaproate levels	8250	2	TRUE			0.00246805	8250	3.99542e-06	184305	TRUE	2.23607e-05	0.00216688	17.9112	29.788	20.4068
rs10789117	C	A	C	A	-0.0805466	-0.012174	0.341811	0.348857	FALSE	FALSE	FALSE	ieu-a-7	1	63072265	0.0096766	184305	0.208359	Coronary heart disease || id:ieu-a-7	Coronary heart disease	Coronary heart disease || ||	TRUE	igd	1	62606594	0.0157387	3.09195e-07	GCST90199659	1-stearoyl-GPI (18:0) levels	8260	2	TRUE			0.0031616	8260	8.58786e-06	184305	TRUE	2.10212e-06	0.00291918	24.1772	29.788	26.1913
rs113735393	A	G	A	G	-0.207519	-0.001909	0.0352927	0.032308	FALSE	FALSE	FALSE	ieu-a-7	16	81558066	0.0310404	184305	0.950961	Coronary heart disease || id:ieu-a-7	Coronary heart disease	Coronary heart disease || ||	TRUE	igd	16	81524461	0.0411356	4.54134e-07	GCST90199659	1-stearoyl-GPI (18:0) levels	8260	2	TRUE			0.00307234	8260	2.05222e-08	184305	TRUE	8.66134e-07	0.00293242	24.2871	29.788	25.4495
rs117400415	G	C	G	C	0.0888842	0.016844	0.186215	0.160671	FALSE	TRUE	FALSE	ieu-a-7	7	89748700	0.0140575	184305	0.230831	Coronary heart disease || id:ieu-a-7	Coronary heart disease	Coronary heart disease || ||	TRUE	igd	7	90119386	0.0195487	5.44662e-06	GCST90199659	1-stearoyl-GPI (18:0) levels	8260	2	TRUE			0.0024972	8260	7.79002e-06	184305	TRUE	2.69269e-05	0.00239444	19.8207	29.788	20.6735
rs13035306	T	C	T	C	-0.156036	-0.0063	0.05619	0.042169	FALSE	FALSE	FALSE	ieu-a-7	2	124719428	0.0273547	184305	0.817852	Coronary heart disease || id:ieu-a-7	Coronary heart disease	Coronary heart disease || ||	TRUE	igd	2	123961851	0.0325815	1.67535e-06	GCST90199659	1-stearoyl-GPI (18:0) levels	8260	2	TRUE			0.00276967	8260	2.87796e-07	184305	TRUE	3.56673e-06	0.0025824	21.3807	29.788	22.9355
rs13265847	G	A	G	A	-0.156331	-0.049213	0.942421	0.854811	FALSE	FALSE	FALSE	ieu-a-7	8	29661804	0.0202298	184305	0.0149865	Coronary heart disease || id:ieu-a-7	Coronary heart disease	Coronary heart disease || ||	TRUE	igd	8	29804288	0.0336519	3.39176e-06	GCST90199659	1-stearoyl-GPI (18:0) levels	8260	2	TRUE			0.00260653	8260	3.21092e-05	184305	TRUE	5.37164e-05	0.00265234	21.9613	29.788	21.581
rs139782415	T	C	T	C	0.126378	0.021708	0.0899487	0.092213	FALSE	FALSE	FALSE	ieu-a-7	4	10516618	0.0169546	184305	0.200419	Coronary heart disease || id:ieu-a-7	Coronary heart disease	Coronary heart disease || ||	TRUE	igd	4	10514994	0.0264791	1.81728e-06	GCST90199659	1-stearoyl-GPI (18:0) levels	8260	2	TRUE			0.00275084	8260	8.89464e-06	184305	TRUE	1.07387e-05	0.00261477	21.6494	29.788	22.7791
rs151115380	T	C	T	C	0.310888	0.002456	0.0130281	0.013174	FALSE	FALSE	FALSE	ieu-a-7	1	164724322	0.0472075	184305	0.958508	Coronary heart disease || id:ieu-a-7	Coronary heart disease	Coronary heart disease || ||	TRUE	igd	1	164755085	0.0661973	2.64817e-06	GCST90199659	1-stearoyl-GPI (18:0) levels	8260	2	TRUE			0.00266375	8260	1.4686e-08	184305	TRUE	4.61661e-06	0.00248556	20.5769	29.788	22.056
rs1555942	A	T	A	T	0.188681	-0.006973	0.965825	0.949562	FALSE	TRUE	FALSE	ieu-a-7	14	68638967	0.0310447	184305	0.822282	Coronary heart disease || id:ieu-a-7	Coronary heart disease	Coronary heart disease || ||	TRUE	igd	14	68172250	0.0418631	6.57211e-06	GCST90199659	1-stearoyl-GPI (18:0) levels	8260	2	TRUE			0.00245387	8260	2.73736e-07	184305	TRUE	1.29576e-05	0.00235014	19.4532	29.788	20.3139
rs1836921	A	G	A	G	-0.0775788	0.007294	0.276299	0.272325	FALSE	FALSE	FALSE	ieu-a-7	9	107754037	0.0106901	184305	0.49504	Coronary heart disease || id:ieu-a-7	Coronary heart disease	Coronary heart disease || ||	TRUE	igd	9	104991756	0.0170992	5.70656e-06	GCST90199659	1-stearoyl-GPI (18:0) levels	8260	2	TRUE			0.00248644	8260	2.52601e-06	184305	TRUE	1.74501e-05	0.00240688	19.924	29.788	20.5842
rs2435583	G	A	G	A	-0.0990229	-0.012767	0.164587	0.152786	FALSE	FALSE	FALSE	ieu-a-7	11	98573845	0.0143454	184305	0.373481	Coronary heart disease || id:ieu-a-7	Coronary heart disease	Coronary heart disease || ||	TRUE	igd	11	98703115	0.0204562	1.29364e-06	GCST90199659	1-stearoyl-GPI (18:0) levels	8260	2	TRUE			0.00282954	8260	4.29752e-06	184305	TRUE	5.39039e-06	0.00269649	22.3278	29.788	23.4326
rs35311550	C	T	C	T	-0.322065	0.004977	0.0141818	0.016198	FALSE	FALSE	FALSE	ieu-a-7	3	584012	0.0415599	184305	0.904677	Coronary heart disease || id:ieu-a-7	Coronary heart disease	Coronary heart disease || ||	TRUE	igd	3	542329	0.0642743	5.42083e-07	GCST90199659	1-stearoyl-GPI (18:0) levels	8260	2	TRUE			0.00303123	8260	7.78133e-08	184305	TRUE	1.09027e-06	0.00290032	24.0205	29.788	25.108
rs4266604	C	T	C	T	0.0745017	0.003881	0.294749	0.282807	FALSE	FALSE	FALSE	ieu-a-7	7	52978724	0.010576	184305	0.713646	Coronary heart disease || id:ieu-a-7	Coronary heart disease	Coronary heart disease || ||	TRUE	igd	7	52911031	0.0166127	7.30464e-06	GCST90199659	1-stearoyl-GPI (18:0) levels	8260	2	TRUE			0.00242952	8260	7.30654e-07	184305	TRUE	1.63709e-05	0.00230759	19.1001	29.788	20.1118
rs6849130	C	T	C	T	-0.108294	0.009638	0.118281	0.105583	FALSE	FALSE	FALSE	ieu-a-7	4	165547240	0.0191772	184305	0.615262	Coronary heart disease || id:ieu-a-7	Coronary heart disease	Coronary heart disease || ||	TRUE	igd	4	164626088	0.0237693	5.21256e-06	GCST90199659	1-stearoyl-GPI (18:0) levels	8260	2	TRUE			0.00250733	8260	1.37047e-06	184305	TRUE	1.35465e-05	0.00244616	20.2499	29.788	20.7575
rs7302336	A	G	A	G	0.113218	0.008255	0.112836	0.107258	FALSE	FALSE	FALSE	ieu-a-7	12	131008165	0.0241328	184305	0.732302	Coronary heart disease || id:ieu-a-7	Coronary heart disease	Coronary heart disease || ||	TRUE	igd	12	130523620	0.0239989	2.38589e-06	GCST90199659	1-stearoyl-GPI (18:0) levels	8260	2	TRUE			0.00268785	8260	6.34872e-07	184305	TRUE	5.56716e-06	0.00256633	21.2473	29.788	22.2561
rs7610125	T	C	T	C	-0.0758416	-0.004987	0.436891	0.409012	FALSE	FALSE	FALSE	ieu-a-7	3	152631117	0.0094832	184305	0.598974	Coronary heart disease || id:ieu-a-7	Coronary heart disease	Coronary heart disease || ||	TRUE	igd	3	152913328	0.0155174	1.02115e-06	GCST90199659	1-stearoyl-GPI (18:0) levels	8260	2	TRUE			0.00288435	8260	1.5005e-06	184305	TRUE	3.01061e-06	0.00283016	23.4378	29.788	23.8878
rs78765237	A	G	A	G	0.24977	0.089064	0.0204739	0.019133	FALSE	FALSE	FALSE	ieu-a-7	9	8396478	0.0372952	184305	0.0169364	Coronary heart disease || id:ieu-a-7	Coronary heart disease	Coronary heart disease || ||	TRUE	igd	9	8396478	0.053264	2.74152e-06	GCST90199659	1-stearoyl-GPI (18:0) levels	8260	2	TRUE			0.00265573	8260	3.09423e-05	184305	TRUE	4.29847e-05	0.00250223	20.7152	29.788	21.9894
rs9436300	G	A	G	A	0.0754039	0.00469	0.68347	0.636665	FALSE	FALSE	FALSE	ieu-a-7	1	65895264	0.0100633	184305	0.641179	Coronary heart disease || id:ieu-a-7	Coronary heart disease	Coronary heart disease || ||	TRUE	igd	1	65429581	0.0169789	8.95281e-06	GCST90199659	1-stearoyl-GPI (18:0) levels	8260	2	TRUE			0.00238264	8260	1.17851e-06	184305	TRUE	2.17351e-05	0.0024601	20.3656	29.788	19.7228
rs102275	C	T	C	T	-0.220549	-0.020886	0.34593	0.337368	FALSE	FALSE	FALSE	ieu-a-7	11	61557803	0.0099579	184305	0.0359559	Coronary heart disease || id:ieu-a-7	Coronary heart disease	Coronary heart disease || ||	TRUE	igd	11	61790331	0.015913	1.11176e-43	GCST90199660	1,2-dipalmitoyl-gpc (16:0/16:0) levels	8264	2	TRUE			0.0227216	8264	2.38689e-05	184305	TRUE	4.76709e-39	0.0220117	185.953	29.788	192.091
rs10778301	A	G	A	G	-0.0693898	0.011314	0.461879	0.456434	FALSE	FALSE	FALSE	ieu-a-7	12	104287077	0.0091725	184305	0.217402	Coronary heart disease || id:ieu-a-7	Coronary heart disease	Coronary heart disease || ||	TRUE	igd	12	103893299	0.0154191	6.78686e-06	GCST90199660	1,2-dipalmitoyl-gpc (16:0/16:0) levels	8264	2	TRUE			0.00244526	8264	8.25507e-06	184305	TRUE	3.39639e-05	0.00239348	19.8224	29.788	20.2522
rs117470433	T	C	T	C	0.26326	0.013322	0.0176685	0.031658	FALSE	FALSE	FALSE	ieu-a-7	16	4884392	0.0287592	184305	0.643203	Coronary heart disease || id:ieu-a-7	Coronary heart disease	Coronary heart disease || ||	TRUE	igd	16	4834391	0.0585744	6.97514e-06	GCST90199660	1,2-dipalmitoyl-gpc (16:0/16:0) levels	8264	2	TRUE			0.00243898	8264	1.16427e-06	184305	TRUE	1.71577e-05	0.00240579	19.9246	29.788	20.2001
rs117752111	G	A	G	A	0.239516	-0.025664	0.0207753	0.022895	FALSE	FALSE	FALSE	ieu-a-7	20	17360322	0.0338202	184305	0.44795	Coronary heart disease || id:ieu-a-7	Coronary heart disease	Coronary heart disease || ||	TRUE	igd	20	17379677	0.0538015	8.51368e-06	GCST90199660	1,2-dipalmitoyl-gpc (16:0/16:0) levels	8264	2	TRUE			0.00239307	8264	3.12437e-06	184305	TRUE	2.71513e-05	0.00233415	19.3299	29.788	19.8189
rs12438714	T	G	T	G	-0.138473	0.011415	0.0645318	0.132921	FALSE	FALSE	FALSE	ieu-a-7	15	93585975	0.0150113	184305	0.446998	Coronary heart disease || id:ieu-a-7	Coronary heart disease	Coronary heart disease || ||	TRUE	igd	15	93042745	0.0307182	6.54901e-06	GCST90199660	1,2-dipalmitoyl-gpc (16:0/16:0) levels	8264	2	TRUE			0.0024535	8264	3.13748e-06	184305	TRUE	2.13274e-05	0.00231506	19.1714	29.788	20.3207
rs12544703	G	A	G	A	-0.106164	-0.012519	0.182667	0.179555	FALSE	FALSE	FALSE	ieu-a-7	8	59310424	0.0121294	184305	0.302015	Coronary heart disease || id:ieu-a-7	Coronary heart disease	Coronary heart disease || ||	TRUE	igd	8	58397865	0.019997	1.1023e-07	GCST90199660	1,2-dipalmitoyl-gpc (16:0/16:0) levels	8264	2	TRUE			0.00339986	8264	5.77997e-06	184305	TRUE	6.46337e-07	0.00336545	27.8993	29.788	28.1854
rs141357957	T	C	T	C	-0.30519	0.017974	0.0127443	0.011849	FALSE	FALSE	FALSE	ieu-a-7	16	9903152	0.0479451	184305	0.707744	Coronary heart disease || id:ieu-a-7	Coronary heart disease	Coronary heart disease || ||	TRUE	igd	16	9809295	0.0679417	7.05785e-06	GCST90199660	1,2-dipalmitoyl-gpc (16:0/16:0) levels	8264	2	TRUE			0.00243626	8264	7.6255e-07	184305	TRUE	1.59726e-05	0.00234378	19.4098	29.788	20.1775
rs145128297	A	G	A	G	-0.298888	-0.027294	0.014713	0.015097	FALSE	FALSE	FALSE	ieu-a-7	5	25233642	0.0451305	184305	0.545326	Coronary heart disease || id:ieu-a-7	Coronary heart disease	Coronary heart disease || ||	TRUE	igd	5	25233533	0.0637577	2.76062e-06	GCST90199660	1,2-dipalmitoyl-gpc (16:0/16:0) levels	8264	2	TRUE			0.00265285	8264	1.98454e-06	184305	TRUE	8.248e-06	0.00259007	21.4547	29.788	21.9762
[truncated: 29,838 more rows]

## Sheet: Sheet3
Supplementary Table S3: Mendelian Randomization Estimates and Sensitivity Analysis Results in Coronary Heart Disease Analysis.
[truncated: 34 more rows]

[truncated: 8 more sheets: Sheet4, Sheet5, Sheet6, Sheet7, Sheet8, Sheet9, Sheet10, Sheet11]
